# Supplementary material for: Genome-wide identification and characterization of SPX-domain-containing protein gene family in Solanum lycopersicum
Source: PeerJ. 2021 Dec 22;9:e12689. doi: 10.7717/peerj.12689 (PMC8710047; doi:10.7717/peerj.12689)
Supplement: Supplemental Information 1 [file peerj-09-12689-s001.xlsx]

## Sheet: Supplementary Table 1
Supplementary Table 1. Normalized expression (RPKM) of tomato genes based on RNA-seq data. Values refer to two replicas
gene ID	normalized expression (RPKM)
	Heinz_bud_rep1	Heinz_bud_rep2	Heinz_flower_rep1	Heinz_flower_rep2	Heinz_leaf_rep1	Heinz_leaf_rep2	Heinz_root_rep1	Heinz_root_rep2	Heinz_1cm_fruit_rep1	Heinz_1cm_fruit_rep2	Heinz_2cm_fruit_rep1	Heinz_2cm_fruit_rep2	Heinz_3cm_fruit_rep1	Heinz_3cm_fruit_rep2	Heinz_MG_fruit_rep1	Heinz_MG_fruit_rep2	Heinz_B_fruit_rep1	Heinz_B_fruit_rep2	Heinz_B+10_fruit_rep1	Heinz_B+10_fruit_rep2
Solyc00g005000	0	0.05	0.12	0.12	0.51	0.58	139.61	134.95	0	0	0	0	0.12	0.06	0.16	0.19	0	0	0	0
Solyc00g005020	0	0	0	0	0	0	0	0	0	0	0	0	0	0	0	0	0	0.2	0.31	0.16
Solyc00g005040	3.27	2.45	3.8	3.13	5.92	7.54	1.31	1.31	6.04	7.95	4.79	2.57	3.75	3.77	6.71	3.05	4.96	5.63	5.62	2.82
Solyc00g005050	52.19	57.74	40.69	41.77	39.76	38.19	53.05	52.98	45.85	47.46	47.19	37.26	43.43	45.4	49.49	52.33	44.19	46.74	49.34	49.51
Solyc00g005060	0	0	0	0	0	0	0	0	0	0	0	0	0	0	0	0	0	0	0	0
Solyc00g005070	0	0	0	0	0	0	0	0	0	0	0	0	0	0	0	0	0	0	0	0
Solyc00g005080	0	0	0	0	0.33	0	0.69	0.69	0	0	0	0.85	0.33	0.66	0	0.37	0	0	0	0.27
Solyc00g005090	0	0	0	0	0	0	0	0	0	0	0	0	0	0	0	0	0	0	0	0
Solyc00g005100	0	0	0	0	0	0	0	0	0	0	0	0	0	0	0	0	0	0	0	0
Solyc00g005110	0	0	0	0	0	0	0	0	0	0	0	0	0	0	0	0	0	0	0	0
Solyc00g005120	0	0	0.53	0	0	0	0	0	0	0	0	0	0	0	0	0	0	0	0	0
Solyc00g005130	0	0.24	0	0	0	0	0	0	0	0	0	0	0.27	0	0	0	0.25	0.26	0	0
Solyc00g005140	0	0	0.19	0	0	0	0	0	0	0	0	0	0	0	0	0	0	0	0	0
Solyc00g005150	0.45	0.23	0.35	0	0.51	0.26	0.45	0	0.31	0	0.25	0	0.17	0	0.46	0.47	0.16	0.25	0.2	0.14
Solyc00g005160	0	0	0	0	0	0	0	0	0	0	0	0	0	0	0	0	0	0	0	0
Solyc00g005170	0	0	0	0	0	0	0	0	0	0	0	0	0	0	0	0	0	0	0	0
Solyc00g005180	0	0	0	0	0	0	0	0	0	0	0	0	0	0	0	0	0	0	0	0
Solyc00g005280	0	0	0	0	0	0	0	0	0	0	0	0	0	0	0	0	0	0	0	0
Solyc00g005420	0	0	0	0	0	0	0	0	0	0	0	0	0	0	0	0	0	0	0	0
Solyc00g005430	0	0	0	0	0	0	0	0	0	0	0	0	0	0	0	0	0	0	0	0
Solyc00g005440	12.72	12.16	12.26	12.22	5.31	6.38	12.66	12.24	35.49	33.15	13.6	8.64	20.54	18.16	16.76	16.38	11.26	12.6	7.74	7.73
Solyc00g005450	0	0	0	0	0	0	0	0	0	0	0	0	0	0	0	0	0	0	0	0
Solyc00g005460	0	0	0	0	0.62	0	0	0	0	0	0	0	0	0	0	0	0	0	0	0
Solyc00g005470	0	0	0	0	0	0	0	0	0	0	0	0	0	0	0	0	0	0	0	0
Solyc00g005480	0	0.24	0	0.28	0	0	0	0	0	0	0	0	0	0	0	0	0	0	0	0
Solyc00g005490	0	0	0	0	0	0	0	0	0	0	0	0	0	0	0	0	0	0	0	0
Solyc00g005840	32.22	31.06	49.21	48.5	92.2	89.78	4.38	3.52	15.28	14.79	17.46	16.68	8.95	7.11	17.98	16.11	8.86	11.59	3.57	2.25
Solyc00g005850	0	0	0	0	0	0	0	0	0	0	0	0	0	0	0	0	0	0	0	0.15
Solyc00g005860	0	0	0	0	0	0	0	0.33	0	0	0.46	0	0	0	0	0	0	0.31	0.49	0
Solyc00g005870	0	0	0	0	0	0	0.1	0	0	0	0	0	0	0.19	0	0	0	0	0	0
Solyc00g005880	0	0	0	0	0	0	0	0	0	0	0	0	0	0	0	0	0	0	0	0
Solyc00g005890	0.98	1	0	0	1.11	0	0	0	0	0	1.66	0	0	0	0	0	0	0	0	0
Solyc00g005900	0	0	0	0	0	0.33	0	0	0	0	0	0	0	0	0	0.37	0	0	0	0
Solyc00g005980	0	0	0	0	0	0	0	0	0	0	0	0	0	0	0	0	0	0	0	0
Solyc00g006010	0	0	0	0	0	0	0	0	0	0	0	0	0	0	0	0	0	0	0	0
Solyc00g006020	0	0	0	0	0	0	0	0	0	0	0	0	0	0	0	0	0	0	0	0
Solyc00g006050	0	0	0	0.19	0	0	0	0	0	0	0	0	0	0	0	0	0	0	0	0
Solyc00g006090	0	0	0	0	0	0	0	0	0	0	0	0	0	0	0	0	0	0	0	0
Solyc00g006170	0	0	0	0	0	0	0	0	0	0	0	0	0	0	0	0	0	0	0	0
Solyc00g006250	0	0	0	0	0	0	0	0	0	0	0	0	0	0	0	0	0	0	0	0
Solyc00g006470	0	0	0	0	0	0	0	0	0	0	0.26	0.45	0	0	0	0	0	0	0	0
Solyc00g006480	0	0	0	0	0	0	0	0	0	0	0	0	0	0	0	0	0	0	0	0
Solyc00g006490	10.35	9.2	13.21	10.87	11	10.31	20.71	18.81	7.15	6.38	10.03	8.87	10.81	10.95	14.43	15.61	15.66	14.6	14.66	16.83
Solyc00g006500	0	0	0	0	0	0	0	0	0	0	0	0	0	0	0	0	0	0	0	0
Solyc00g006510	0	0	0	0	0	0	0	0	0	0	0	0	0	0	0	0	0	0	0	0
Solyc00g006520	0	0	0	0	0	0	0	0	0	0	0	0	0	0	0	0	0	0	0	0
Solyc00g006530	0	0	0	0	0	0	0	0	0	0	0	0	0	0	0	0	0	0	0	0
Solyc00g006540	0	0	0	0	0	0	0	0	0	0	0	0	0	0	0	0	0	0	0	0
Solyc00g006550	0	0	0	0	0	0	0	0	0	0	0	0	0	0	0	0	0	0	0	0
Solyc00g006560	0	0	0	0	0	0	0	0	0	0	0	0	0	0	0	0	0	0	0	0
Solyc00g006570	0	0	0	0	0	0	0	0	0	0	0	0	0	0	0	0	0	0	0	0
Solyc00g006590	0	0.12	0	0	0	0	0	0	0	0	0	0	0	0	0	0	0	0	0.1	0.32
Solyc00g006600	0.3	0.15	0	0.18	0.17	0.09	0.36	0.27	0	0.21	0	0	0.09	0	0.35	0.38	0	0.17	0.33	0.35
Solyc00g006630	0	0	0	0	0	0	0	0	0	0	0	0	0	0	0	0	0	0	0	0
Solyc00g006650	0	0	0	0	0	0	0	0	0	0	0	0	0	0	0	0	0	0	0	0
Solyc00g006660	0	0	0	0	0	0	0	0	0	0	0	0	0	0	0	0	0	0	0	0
Solyc00g006670	0	0	0	0	0	0	0	0	0	0	0	0	0	0	0	0	0	0	0	0
Solyc00g006680	0	0	0	0	0	0	0	0	0	0	0	0	0	0	0	0	0	0	0	0
Solyc00g006690	0	0	0	0	0	0	0	0	0	0	0	0	0	0	0	0	0	0	0	0
Solyc00g006700	0	0	0	0	0	0	0	0	0	0	0	0	0	0	0	0	0	0	0	0
Solyc00g006800	73.55	67.71	118.09	120.91	17.32	16.64	312.69	305.16	123.82	124.16	175.06	156.68	139.19	134.38	131.96	139.39	109.64	110.58	148.59	143.22
Solyc00g006810	18.55	22.16	18.42	17.91	38.63	39.07	6.5	5.06	21.41	21.81	18.33	17.26	17.17	13.33	23.06	17.01	32.57	31.77	33.49	34.88
Solyc00g006820	10.37	10.26	7.34	6.02	18.86	18.09	1.53	1.04	2.81	2.96	5.02	4.54	10	9.84	3.24	4.11	1.1	0.84	0.3	0.31
Solyc00g006830	4.19	4.88	4.89	4.67	3.61	4.8	21.52	22.52	7.44	6.73	18.03	14.19	15.36	15.86	19.02	18.36	17.23	17.17	18.34	16.91
Solyc00g006840	0	0	0	0	0	0	0	0	0	0	0	0	0	0	0	0	0	0	0	0
Solyc00g006850	0	0	0	0	0	0	0	0	0	0	0	0	0	0	0	0	0	0	0	0
Solyc00g006860	0	0	0	0	0	0	0	0	0	0	0	0	0	0	0	0	0	0	0	0
Solyc00g006870	0	0	0	0	0	0	0	0	0	0	0	0	0	0	0	0	0	0	0	0
Solyc00g006880	0	0	0	0	0	0	0	0	0	0	0	0	0	0	0	0	0	0	0	0
Solyc00g006890	0	0	0	0	0	0	0	0	0	0	0	0	0	0	0	0	0	0	0	0
Solyc00g006900	0.88	0.36	0.2	1.26	1.99	1.42	1.48	1.26	1.7	0.99	2.97	2.33	3.22	1.62	1.08	1.56	2.29	3.75	4.22	2.11
Solyc00g007000	0	0	0	0.68	0	0	0	0.68	0	0	0	0	0	0	0	0	0	0	0	0
Solyc00g007010	26.03	24.68	10.2	8.53	6.94	7.28	15.69	15.93	8.43	9.08	11.19	9.63	5.14	5.52	6.15	7.17	8.71	8.06	13.88	13.98
Solyc00g007020	0	0	0	0	0	0	0	0	0	0	0	0	0	0	0	0	0	0	0	0
Solyc00g007030	0	0	0	0	0	0	0.14	0	0	0.33	0.4	0	0.14	0	0	0	0	0	0	0
Solyc00g007040	0	0	0	0	0	0	0	0	0.17	0	0	0	0.28	0	0	0	0	0	0	0
Solyc00g007050	0	0	0	0	0	0	0	0	0	0	0	0	0	0	0	0	0	0	0	0
Solyc00g007060	9.06	8.65	7.4	6.45	10.84	11.15	22.35	21.43	12.94	9.2	9.12	7.6	7.19	6.54	8.16	8.62	5.49	6.73	5.08	6.48
Solyc00g007070	68.61	62.18	65.49	69.14	48.17	45.17	61.98	57.43	67.81	65.25	57.21	53.28	65.95	66.35	50.81	51.98	54.6	54.01	59	59.82
Solyc00g007080	25.82	24.4	2.89	1.99	2	1.2	1.12	1.49	9.49	9.03	3.86	2.75	1.67	1.68	1.92	1.45	0.11	0	0.18	0.19
Solyc00g007090	20.29	19.08	10.84	10.05	11.38	14.43	11.19	10.56	17.04	17.28	11.28	8.01	12.11	11	8.52	7.43	7.12	6.33	9.2	6.53
Solyc00g007100	34.14	34.53	32.43	32.57	8.07	7.49	38.09	37.52	9.46	7.77	11.32	10.57	8.27	9.55	16	15.35	10.28	9.84	9.49	9.73
Solyc00g007110	2.39	2.06	1.85	1.59	1.56	1.84	7.52	7.44	3.09	2.98	5.03	4.93	3.9	3.25	5.72	4.39	1.84	1.67	2.6	3.29
Solyc00g007120	3	2.68	1.87	2.82	2.12	2.68	7.01	8.71	4.78	4.21	6.47	6.85	4.3	4.24	6.58	6.52	2.76	2.69	3.3	3.77
Solyc00g007130	0.97	0.81	1.32	0.75	0.64	1.31	0.34	0.14	0.39	0.32	0.58	0.84	0.39	0.46	0.35	0.51	0.43	0.45	0.61	0.84
Solyc00g007140	0	0	0	0	0	0	0	0.32	0	0	0	0	0	0	0	0	0	0	0	0.24
Solyc00g007150	3.14	2.14	3.85	3.34	1.38	1.61	10.66	8.14	2.17	1.96	5.01	4.62	2.4	3.62	4.03	4.65	4.16	2.74	3.25	3.86
Solyc00g007160	0	0.17	0	0.2	0	0	0	0	0	0	0	0.25	0	0	0	0	0	0	0.15	0
Solyc00g007170	0	0	0	0.73	0	0	0	0.37	0	0	0	0	0	0	0	0	0.33	0	0	0
Solyc00g007180	0	0	0	0	0	0	0	0	0	0	0	0	0	0	0	0	0	0	0	0
Solyc00g007190	4.86	5.44	0.33	0.27	0.32	0.13	0.69	0.41	0.4	0.48	0.87	0.34	0.46	0.26	0.79	0.65	0.43	0.26	0.36	0.58
Solyc00g007200	6.07	6.26	7.17	5.17	3.7	3.5	19.6	18.08	0.64	0.45	0.16	0.2	0.11	0	0.07	0.18	0	0.1	0.04	0
Solyc00g007210	0	0	0	0	0	0	0	0	0	0	0	0	0	0	0	0	0	0	0	0
Solyc00g007220	6.14	6.87	4.01	2.75	1.3	1.33	1.27	1.84	0.66	1.08	0.81	0.42	2.42	1.66	8.13	8.05	16.65	17.89	17.23	21.1
Solyc00g007230	0	0	0	0	0	0	0	0	0	0	0	0	0	0	0	0	0	0	0	0
Solyc00g007240	0	0	0	0	0	0	0	0	0	0	0	0	0	0	0	0	0	0	0	0
Solyc00g007250	0	0	0	0	0	0	0	0	0	0	0	0	0	0	0	0	0	0	0	0
Solyc00g007260	6.74	5.89	5.2	5.54	5.01	4.81	6.17	5.86	8.19	8.09	9.31	6.44	8.79	6.59	4.2	5.16	3.68	4.16	4.02	3.94
Solyc00g007270	148.79	146.11	172.86	175.38	173.68	171.18	187.33	177.43	177.92	175.74	188.93	162.58	281.31	267.68	276.05	274.48	208.2	205.39	130.51	123.34
Solyc00g007290	0.26	0	0	0	0	0	0	0	0	0	0	0	0	0	0	0	0	0	0	0
Solyc00g007300	4.65	4.29	7.63	8.22	3.81	3.81	5.04	5.61	3.7	2.88	6.46	5.32	7.28	8.73	7.06	8.12	4.63	4.45	10.09	8.91
Solyc00g007310	0	0	0	0	0	0	0	0	0	0	0	0	0	0	0	0	0	0	0	0
Solyc00g007320	0	0	0	0	0	0	0	0	0	0	0	0	0	0	0	0	0	0	0	0
Solyc00g007330	0	0	0	0	0	0	0	0	0	0	0	0	0	0	0	0	0	0	0	0
Solyc00g007340	0	0	0	0	0	0	0	0	0	0	0	0	0	0	0	0	0	0	0	0
Solyc00g007350	0	0.1	0	0	0	0	0	0	0	0	0	0	0	0	0	0	0	0	0	0
Solyc00g007450	0	0	0	0	0	0	0	0	0	0	0	0	0	0	0	0	0	0	0	0
Solyc00g007550	0	0	0	0	0	0	0.92	0.92	0	1.08	1.3	4.54	0.88	1.78	1.18	0	0.83	0	0	0.71
Solyc00g007560	0.09	0.09	0	0.11	0	0.11	0	0	0	0	0	0	0.32	0.11	0	0.12	0	0	0	0
Solyc00g007570	0	0	0	0	0	1.71	0	1.33	0	0.52	0	0	0	0	0	0	0	0	0	0
Solyc00g007580	0	0	0	0	0	0	0	0	0	0	0	0	0	0	0	0	0	0	0	0
Solyc00g007590	0	0	0	0	0	0	0	0	0	0	0	0	0	0	0	0	0	0	0	0
Solyc00g007600	0.34	0	0.4	0	0.39	0.2	0.2	0.2	0.24	0	0.58	0.5	0.39	0.2	0.26	0.65	0.18	0	0	0.16
Solyc00g007610	0	0	0	0	0	0	0	0	0	0	0	0	0	0	0	0	0	0	0	0
Solyc00g007910	0	0	0	0	0	0	0	0	0	0	0	0	0	0	0	0	0	0	0	0
Solyc00g007920	0	0	0	0	0	0	0	0	0	0	0	0	0	0	0	0	0	0	0	0
Solyc00g007930	0	0	0	0	0	0	0	0	0	0	0	0	0	0	0	0	0	0	0	0
Solyc00g007940	0	0	0	0	0	0	0	0	0	0	0	0	0	0	0	0	0	0	0	0
Solyc00g007950	0	0	0	0	0	0	0	0	0	0	0	0	0	0	0	0	0	0	0	0
Solyc00g007960	0	0	0	0	0	0	0	0	0	0	0	0	0	0	0	0	0	0	0	0
Solyc00g007970	0	0	0	0	0	0	0	0	0	0	0	0	0	0	0	0	0	0	0	0
Solyc00g007980	0	0	0	0	0	0	0	0	0	0	0	0	0	0	0	0	0	0	0	0
Solyc00g007990	0	0	0	0	0	0	0	0	0	0	0	0	0	0	0	0	0	0	0	0
Solyc00g008000	0	0	0	0	0	0	0	0	0	0	0	0	0	0	0	0	0	0	0	0
Solyc00g008010	0	0	0	0	0	0	0	0	0	0	0	0	0	0	0	0	0	0	0	0
Solyc00g008020	0	0	0	0	0	0	0	0	0	0	0	0	0	0	0	0	0	0	0	0
Solyc00g008030	0	0	0	0	0	0	0	0	0	0	0	0	0	0	0	0	0	0	0	0
Solyc00g008040	0	0	0	0	0	0	0	0	0	0	0	0	0	0	0	0	0	0	0	0
Solyc00g008050	0	0	0	0	0	0	0	0	0	0	0	0	0	0	0	0	0	0	0	0
Solyc00g008060	0	0	0	0	0	0	0	0	0	0	0	0	0	0	0	0	0	0	0	0
Solyc00g008070	0	0	0	0	0	0	0	0	0	0	0	0	0	0	0	0	0	0	0	0
Solyc00g008080	0	0	0	0	0	0	0	0	0	0	0	0	0	0	0	0	0	0	0	0
Solyc00g008090	0	0	0	0	0	0	0	0	0	0	0	0	0	0	0	0	0	0	0	0
Solyc00g008100	0	0	0	0	0	0	0	0	0	0	0	0	0	0	0	0	0	0	0	0
Solyc00g008110	0	0	0	0	0	0	0	0	0	0	0	0	0	0	0	0	0	0	0	0
Solyc00g008120	0	0	0	0	0	0	0	0	0	0	0	0	0	0	0	0	0	0	0	0
Solyc00g008130	0	0	0	0	0	0	0	0	0	0	0	0	0	0	0	0	0	0	0	0
Solyc00g008140	0	0	0	0	0	0	0	0	0	0	0	0	0	0	0	0	0	0	0	0
Solyc00g008150	0	0	0	0	0	0	0	0	0	0	0	0	0	0	0	0	0	0	0	0
Solyc00g008160	0	0	0	0	0	0	0	0	0	0	0	0	0	0	0	0	0	0	0	0
Solyc00g008260	0	0	0	0	0	0	0	0	0	0	0	0	0	0	0	0	0	0	0	0
Solyc00g008270	0	0	0	0	0	0	0	0	0	0	0	0	0	0	0	0	0	0	0	0
Solyc00g008570	0	0	0	0	0	0	0	0	0	0	0	0	0.64	0	0	0	0	0	0	0
Solyc00g008580	0	0	0	0	0	0	0	0	0	0	0	0	0	0	0	0	0	0	0	0
Solyc00g008680	50.27	48.04	51.3	53.24	45.77	47.66	105.15	100.26	79.97	81.3	90.82	80.67	80.98	80.74	62.37	64.19	82.46	80.66	70.77	68.95
Solyc00g008690	0	0	0	0	0	0	0	0	0	0	0	0	0	0	0	0	0	0	0	0
Solyc00g008800	0	0	0	0	0	0	0	0	0	0	0	0	0	0	0	0	0	0	0	0
Solyc00g008900	0	0	0	0	0	0	0	0	0	0	0	0	0	0	0	0	0	0	0	0
Solyc00g008910	0	0	0	0	0	0	0	0	0	0	0	0	0	0	0	0	0	0	0	0
Solyc00g008920	0	0	0	0	0	0	0	0	0	0	0	0	0	0	0	0	0	0	0	0
Solyc00g009020	127.27	122.89	100.65	100.03	59.08	59.23	142.01	133.85	198.98	195.78	168.13	148.94	145.8	144.41	96.12	98.05	71.82	73.27	75.71	70.61
Solyc00g009030	0.36	0.37	0	0.09	0	0	0	0	0	0.1	0	0	0.08	0	0	0	0	0	0	0
Solyc00g009040	8.55	8.22	2.01	1.83	0	0	0.09	0.05	0.16	0.06	0.27	0.23	0.31	0.23	0	0	0	0	0	0
Solyc00g009050	0.78	0.72	0.18	0.09	0.09	0	0.47	0.37	0.97	2.41	0.13	0.57	0.27	0.18	0.12	0.59	0	0.09	0	0
Solyc00g009060	18.85	15.14	12.51	14.05	11.97	12.87	17.77	16.56	12.85	9.7	10.53	10.04	12.56	12.41	25.84	24.84	23.45	20.96	25.89	30
Solyc00g009070	22.72	25.04	0	0	0	0	3.44	3.7	0	0	0	0	0	0	0	0	0	0	0	0
Solyc00g009080	19.2	19.16	8.85	7.99	11.15	13.25	11.66	8.14	26.29	31.09	25.37	24.34	9.4	9.46	12.26	10.12	6.61	7.11	10.41	12.99
Solyc00g009090	0.25	0.1	0.41	0.69	0.14	0.32	3.41	4	0	0	0.04	0	0	0	0	0	0	0	0	0
Solyc00g009100	7.21	7.38	9.81	10.32	32.86	33.63	4.13	3.56	13.13	12.05	9.02	8.76	6.22	6.26	6.61	6.77	7.88	8.79	8.34	8.15
Solyc00g009110	9.47	8.3	18.52	18.29	15.65	16.12	24.19	22.39	2.61	2.97	4.98	4.01	8.22	7.97	9.13	9.98	2.33	1.91	2.38	2.3
Solyc00g009120	20.9	17.7	32.44	39.67	22.99	25.91	28.67	24.56	4.99	4.2	8.19	8.05	8.15	8.67	12.21	10.47	6.14	6.25	7.97	9.99
Solyc00g009130	1.86	2.85	3.53	3.84	1.53	1.46	1.01	1.42	0.7	1.07	1.14	0.75	1.07	0.58	1.17	1.18	0.73	0.38	2.1	2.57
Solyc00g009140	29.35	29.04	32.22	33.16	12.59	13.71	7.07	5.9	10.97	10.72	14.71	13.24	7.09	8.25	16.51	13.75	16.87	13.78	35.38	36.68
Solyc00g009240	0	0	0	0	0	0	0	0	0	0	0	0	0	0	0	0	0	0	0	0
Solyc00g009440	0	0	0	0.56	0	0	0	0	0	0	0	0	0	0	0	0	0	0	0.83	0.86
Solyc00g009540	0	0	0	0	0	0	0	0	0	0	0	0	0	0	0	0	0	0	0	0
Solyc00g009650	0	0	0	0	0	0	0	0	0	0	0	0	0	0	0	0	0	0	0	0
Solyc00g009660	0	0	0	0	0	0	0	0	0	0	0	0	0	0	0	0	0	0	0	0
Solyc00g009760	0	0	0	0.64	0	0	0	0	0	0.25	0	0	0	0	0	0	0	0	0	0
Solyc00g009770	0	0	0	0	0	0	0	0	0	0	0	0	0	0	0	0	0	0	0	0
Solyc00g009780	0	0	0	0	0	0	0	0	0	0	0	0	0	0	0	0	0	0	0	0
Solyc00g009790	0	0	0	0	0	0	0	0	0	0	0	0	0	0	0	0	0	0	0	0
Solyc00g009800	0	0	0	0	0	0	0	0	0	0	0	0	0	0	0	0	0	0	0	0
Solyc00g010100	0	0	0	0	0	0	0	0	0	0	0	0	0	0	0	0	0	0	0	0
Solyc00g010110	0	0	0	0	0	0	0	0	0	0	0	0	0	0	0	0	0	0	0	0
Solyc00g010210	0	0	0	0	0	0	0	0	0	0	0	0	0	0	0	0	0	0	0	0
Solyc00g010410	0	0	0	0	0	0	0	0	0	0	0	0	0	0	0	0	0	0	0	0
Solyc00g010420	0	0	0	0	0	0	0	0	0	0	0	0	0	0	0	0	0	0	0	0
Solyc00g010520	0	0	0	0	0	0	0	0	0	0	0	0	0	0	0	0	0	0	0	0
Solyc00g010530	0	0	0	0	0	0	0	0	0	0	0	0	0	0	0	0	0	0	0	0
Solyc00g010540	0	0	0.1	0	0	0	0.1	0	0	0	0.14	0	0	0	0	0	0.09	0	0	0
Solyc00g010550	0	0	0	0	0	0	0	0	0	0	0	0	0	0	0	0	0	0	0	0
Solyc00g010750	0.77	0.66	0.75	0.15	1.02	0.3	2.15	0.77	0.71	0.72	1.3	1.13	2.21	1.63	1.18	1.3	0.7	1.58	1.03	1.07
Solyc00g010760	0	0	0	0	0	0	0	0	0	0	0	0	0	0	0.19	0	0	0.14	0.11	0
Solyc00g010770	1.8	3.56	1.12	0.72	0.14	0.14	0	0	0	0.17	0	0.18	0	0.28	0.37	0.31	0	0	0.32	0
Solyc00g010780	0	0	0	0	0	0	0	0	0	0	0	0	0	0	0	0	0	0	0	0
Solyc00g010790	0	0	0	0	0	0	0	0	0	0	0	0	0	0	0	0	0	0	0	0
Solyc00g010810	0	0	0	0	0	0	0	0	0	0	0	0	0	0	0	0	0	0	0	0
Solyc00g010930	0	0	0	0	0	0	0	0	0	0	0	0	0	0	0	0	0	0	0	0
Solyc00g011130	0	0	0	0	0	0	0	0	0	0	0	0	0	0	0	0	0	0	0	0
Solyc00g011140	0	0	0	0	0	0	0	0	0	0	0	0	0	0	0	0	0	0	0	0
Solyc00g011150	0	0	0	0	0	0	0	0	0	0	0	0	0	0	0	0	0	0	0	0
Solyc00g011160	0	0	0	0	0	0	0	0	0	0	0	0	0	0	0	0	0	0	0	0
Solyc00g011170	0	0	0	0	0	0	0	0	0	0	0	0	0	0	0	0	0	0	0	0
Solyc00g011180	0	0	0	0	0	0	0	0	0	0	0	0	0	0	0	0	0	0	0	0
Solyc00g011310	0	0	0	0	0	0	0	0	0	0	0	0	0	0	0	0	0	0	0	0
Solyc00g011550	0	0	0	0	0	0	0	0	0	0	0	0	0.17	0	0	0	0	0	0	0
Solyc00g011560	0	0	0	0	0	0	0	0.18	0	0	0	0	0.18	0.35	0	0	0	0.17	0.27	0
Solyc00g011660	0	0	0	0	0	0	0	0	0.13	0	0	0	0.21	0.21	0	0	0	0	0	0
Solyc00g011670	0	0	0	0	0	0	0	0	0	0	0	0	0	0	0	0	0	0	0	0
Solyc00g011870	0	0	0	0	0	0	0	0	0	0	0	0	0	0	0	0	0	0	0	0
Solyc00g011880	12.83	10.89	7.74	7.17	9.48	9.11	9.01	5.47	9.75	10.15	9.01	6.45	6.87	5.7	7.61	9.55	8.46	6.41	4.48	2.72
Solyc00g011890	45.57	43.77	109.89	108.55	13.32	14.62	12.58	11.57	16.54	15.49	19.77	19.48	41.05	42.2	39.26	37.33	79.13	82.72	81.02	86.19
Solyc00g012090	0	0	0	0	0	0	0	0	0	0	0	0	0	0	0	0	0	0	0	0
Solyc00g012310	0	0	0	0	0	0	0	0	0	0	0	0	0	0	0	0	0	0	0	0
Solyc00g012430	0	0	0	0	0	0	0	0	0	0	0	0	0	0	0	0	0	0	0	0
Solyc00g012440	0	0	0	0	0	0	0	0	0	0	0	0	0	0	0	0	0	0	0	0
Solyc00g012540	0	0.08	0	0	0	0	0	0	0	0	0	0	0	0	0	0	0	0	0	0
Solyc00g012640	0	0	0	0	0	0	0	0	0	0	0	0	0	0	0	0	0	0	0	0
Solyc00g012650	0	0	0	0	0	0	0	0	0	0	0	0	0	0	0	0	0	0	0	0
Solyc00g012660	0	0	0	0	0	0	0	0	0	0	0	0	0	0	0	0	0	0	0	0
Solyc00g012670	0	0	0	0	0	0	0	0	0	0	0	0	0	0	0	0	0	0	0	0
Solyc00g012680	0	0	0	0	0	0	0	0	0	0	0	0	0	0	0	0	0	0	0	0
Solyc00g012690	0	0	0	0	0	0	0	0	0	0	0	0	0	0	0	0	0	0	0	0
Solyc00g012700	0	0	0	0	0	0	0	0	0	0	0	0	0	0	0	0	0	0	0	0
Solyc00g012800	0	0	0	0	0	0	0	0	0	0	0	0	0	0	0	0	0	0	0	0
Solyc00g012900	0	0	0	0	0	0	0	0	0	0	0	0	0	0	0	0	0	0	0	0
Solyc00g013000	0	0	0	0	0	0	0	0	0	0	0	0	0	0	0	0	0	0	0	0
Solyc00g013100	0	0	0	0	0	0	0	0	0	0	0	0	0	0	0	0	0	0	0	0
Solyc00g013110	0	0	0	0	0	0	0	0.38	0	0	0	0.47	0.37	0.37	0	0.41	0.35	0	0	0
Solyc00g013120	0.87	1.4	3.04	3.28	3.81	2.3	12.86	14.34	2.42	2.98	4.85	4.59	3.29	2.16	7.68	8.71	8.38	7.56	6.21	4.49
Solyc00g013130	2.19	2.24	5.36	5.34	2.24	2.03	19.14	17.8	5.07	5.14	14.49	13.48	21.56	19.75	17.58	16.92	22.3	21.45	15.87	15.14
Solyc00g013140	1.79	2.08	2.43	2.14	0.56	0.92	3.92	4.65	2.22	2.6	6.26	4.9	8.27	9.31	3.51	2.98	5.81	7.27	4.6	3.36
Solyc00g013150	0	0	0	0	0	0	0	0	0	0.41	0	0.86	0	0	0	0	0	0	0	0
Solyc00g013160	0.67	0.68	1.93	2.59	1.51	2.69	11.18	8.97	1.15	1.17	2.54	4.17	4.01	3.84	8.46	10.15	12.28	9.72	10.8	8.92
Solyc00g013170	0	0	0	0	0	0	0	0	0	0	0	0	0	0	0	0	0	0	0	1.13
Solyc00g013180	0.48	0.33	1.12	1.15	0.18	0.93	1.74	1.35	1.11	0.23	1.63	3.32	9.77	5.19	0	0.41	0.35	0.9	0.86	0.74
Solyc00g013190	0	0.29	0.97	0	0.32	0.97	1	1	0.39	0.39	0.94	0.82	6.08	5.15	0.43	0.35	0.61	0.63	0.5	0.26
Solyc00g013320	0	0	0	0	0	0	0	0	0	0	0	0	0	0	0	0	0	0	0	0
Solyc00g013330	0	0	0	0	0	0	0	0	0	0	0	0	0	0	0	0	0	0	0	0
Solyc00g013770	0	0	0	0	0	0	0	0	0	0	0	0	0	0	0	0	0	0	0	0
Solyc00g014170	0	0	0	0	0	0	0	0	0	0	0	0	0	0	0	0	0	0	0	0
Solyc00g014180	0	0	0	0	0	0	0	0	0	0	0	0	0	0	0	0	0	0	0	0
Solyc00g014190	0	0	0	0	0	0	0	0	0	0	0	0	0	0	0	0	0	0	0	0
Solyc00g014290	0	0	0	0	0	0	0	0	0	0	0	0	0	0	0	0	0	0	0	0
Solyc00g014390	0	0	0	0	0	0	0	0	0	0	0	0	0	0	0	0	0	0	0	0
Solyc00g014790	0.1	0	0.23	0.24	0	0.23	1.33	0.36	0.14	0.14	1.19	0.89	0.81	0.35	0.78	1.28	0.98	1.36	2.51	2.23
Solyc00g014800	0	0.18	0	0.21	0	0.2	0.42	0.21	0	0	0.29	0	0	0.4	0.27	0	0.38	0.58	0.15	0.64
Solyc00g014810	0	0	0	0	0	0	0	0	0	0	0	0	0	0.6	0	0	0	0.58	0	0.48
Solyc00g014820	0	0.12	0.14	0	0	0	0.29	0.15	0	0	0.21	0	0.14	0.42	0	0.31	0.26	0	0.43	0.23
Solyc00g014830	4.92	4.2	9.7	8.19	5.36	5.39	15.32	14.33	8.46	8.4	13.81	12.48	19.5	19.47	9.02	8.55	15.54	16.93	10.96	11.85
Solyc00g014840	0.25	0	0.29	0	0	0	0	0.3	0.35	0	0	0.37	0.57	0	0	0.32	0	0	0.22	0.46
Solyc00g014850	0.55	0.84	0.95	1.31	0.62	1.26	1.31	0.66	0	1.54	4.17	4.03	9.73	8.21	1.26	0	0.3	0.92	1.22	0.76
Solyc00g014860	0	0	0	0	0	0	0	0.43	0	0	0	0	0.41	0	0	0	0	0	0	0
Solyc00g014960	0	0	0	0	0	0	0	0	0	0	0	0	0	0	0	0	0	0	0	0
Solyc00g014970	0	0	0	0	0	0	0	0	0	0	0	0	0	0	0	0	0	0	0	0
Solyc00g014980	0	0	0	0	0	0	0	0	0	0	0	0	0	0	0	0	0	0	0	0
Solyc00g014990	0	0	0	0	0	0	0	0	0	0	0	0	0	0	0	0	0	0	0	0
Solyc00g015000	0	0	0	0	0	0	0	0	0	0	0	0	0	0	0	0	0	0	0	0
Solyc00g015600	0	0	0	0	0	0	0	0	0	0	0	0	0	0	0	0	0	0	0	0
Solyc00g015610	0	0	0	0	0	0	0	0	0	0	0	0	0	0	0	0	0	0	0	0
Solyc00g015720	0	0	0	0	0	0	0	0	0	0	0	0	0	0	0	0	0	0	0	0
Solyc00g015730	0	0	0	0	0	0	0	0	0	0	0	0	0	0	0	0	0	0	0	0
Solyc00g015740	0	0	0	0	0	0	0	0	0	0	0	0	0	0	0	0	0	0	0	0
Solyc00g015750	0	0	0	0	0	0	0	0	0	0	0	0	0	0	0	0	0	0	0	0
Solyc00g015760	0	0	0	0	0	0	0	0	0	0	0	0	0	0	0	0	0	0	0	0
Solyc00g015770	0	0	0	0	0	0	0	0	0	0	0	0	0	0	0	0	0	0	0	0
Solyc00g016470	0	0	0	0	0	0	0	0	0	0	0	0	0	0	0	0	0	0	0	0
Solyc00g016480	0	0	0	0	0	0	0	0	0	0	0	0	0	0	0	0	0	0	0	0
Solyc00g016490	0	0	0	0	0	0	0	0	0	0	0	0	0	0	0	0	0	0	0	0
Solyc00g016590	0	0	0	0	0	0	0	0	0	0	0	0	0	0	0	0	0	0	0	0
Solyc00g016790	0	0	0	0	0	0	0	0	0	0	0	0	0	0	0	0	0	0	0	0
Solyc00g016890	0	0	0	0	0	0	0	0	0	0	0	0	0	0	0	0	0	0	0	0
Solyc00g016900	0	0	0	0	0	0	0	0	0	0	0	0	0	0	0	0	0	0	0	0
Solyc00g016910	0	0	0	0	0	0	0	0	0	0	0	0	0	0	0	0	0	0	0	0
Solyc00g017210	0	0.07	0	0	0	0	0	0	0	0	0	0	0	0	0	0	0	0	0	0
Solyc00g017220	0	0	0	0	0	0	0	0	0	0	0	0	0	0	0	0	0	0	0	0
Solyc00g017230	0	0	0	0	0	0	0	0	0	0	0	0	0	0	0	0	0	0	0	0
Solyc00g017530	0	0	0	0	0	0	0	0	0	0	0	0	0	0	0	0	0	0	0	0
Solyc00g017540	0	0	0	0	0	0	0	0	0	0	0	0	0	0	0	0	0	0	0	0
Solyc00g017550	0	0	0	0	0	0	0	0	0	0	0	0	0	0	0	0	0	0	0	0
Solyc00g017750	0	0	0	0	0	0	0	0	0	0	0	0	0	0	0	0	0	0	0	0
Solyc00g017760	0	0	0	0	0	0	0	0	0	0	0	0	0	0	0	0	0	0	0	0
Solyc00g017860	0	0	0	0	0	0	0	0	0	0	0	0	0	0	0	0	0	0	0	0
Solyc00g017870	0	0	0	0	0	0	0	0	0	0	0	0	0	0	0	0	0	0	0	0
Solyc00g017880	0	0	0	0	0	0	0	0	0	0	0	0	0	0	0	0	0	0	0	0
Solyc00g017890	0	0	0	0	0	0	0	0	0	0	0	0	0	0	0	0	0	0	0	0
Solyc00g017900	0	0	0	0	0	0	0	0	0	0	0	0	0	0	0	0	0	0	0	0
Solyc00g017910	0	0	0	0	0	0	0	0	0	0	0	0	0	0	0	0	0	0	0	0
Solyc00g017920	0	0	0	0	0	0	0	0	0	0	0	0	0	0	0	0	0	0	0	0
Solyc00g017930	0	0	0	0	0	0	0	0	0	0	0	0	0	0	0	0	0	0	0	0
Solyc00g018760	0	0	0	0	0	0	0	0	0	0	0	0	0	0	0	0	0	0	0	0
Solyc00g018770	0	0	0	0	0	0	0	0	0	0	0	0	0	0	0	0	0	0	0	0
Solyc00g018970	0	0	0	0	0	0	0	0	0	0	0	0	0	0	0	0	0	0	0	0
Solyc00g019610	0	0	0	0	0	0	0	0	0	0	0	0	0	0	0	0	0	0	0	0
Solyc00g019620	0	0	0	0	0	0	0	0	0	0	0	0	0	0	0	0	0	0	0	0
Solyc00g019630	0	0	0	0	0	0	0	0	0	0	0	0	0	0	0	0	0	0	0	0
Solyc00g019730	0.39	0.2	1.13	1.85	0	0	1.16	0.23	1.07	1.9	6.23	2.85	9.1	7.82	0	0.98	0.42	0.65	1.38	1.61
Solyc00g019740	1.99	1.85	1.9	1.73	0.21	0.63	3.48	4.13	1.76	2.29	15.65	12.56	16.84	13.39	1.12	2.3	1.18	0.81	2.42	3.01
Solyc00g019750	0.41	1.66	0.47	0.49	0.92	0	1.46	0.97	0.56	2.28	3.44	2.4	6.99	8.91	0.63	0.52	0.44	0.46	1.45	1.5
Solyc00g019950	0.6	0.76	0.69	0.53	0	0	1.97	1.25	0.83	0.42	4.54	2.64	4.78	5.5	0.23	0	0.48	0.33	0.26	0.69
Solyc00g019960	0	0	0	0.88	0	0	0	0.44	0	0.52	0	2.72	0	0.85	0	0	0	0.83	0	0.34
Solyc00g019970	0	0.38	0	0	0	0.22	0	0	0	0.13	0	3.18	0	0.32	0	0	0	0	0.17	0
Solyc00g019980	0	0	0	0	0	0.11	0	0	0.14	0.14	0.33	0.14	0	0.11	0	0	0	0	0.17	0.09
Solyc00g019990	0	0	0	0	0	0	0	0	0	0	0	0	0	0	0	0.5	0.43	0	0.35	0
Solyc00g020000	0	0	0	0	0	0	0	0.59	0	0.69	0	0	0	0	0	0.62	0	0	0	0.45
Solyc00g020010	0.75	0.38	0.87	0.9	0	0	0.45	0.9	0.52	0	1.27	0.55	0.43	0	1.15	1.43	1.62	2.1	1.66	2.42
Solyc00g020020	0	0.1	0.12	0	0	0	0.24	0.12	0	0.28	0.34	0	0.23	0.57	0	0	0	0.11	0.18	0
Solyc00g020030	0	0	0.49	0.51	0	0.49	0.51	1.02	1.77	0.6	2.88	0	0.49	1.96	0.65	1.62	0.92	0	1.13	1.57
Solyc00g020040	0	0	0.16	0.66	0.16	0	0.16	0.16	0.19	0.19	0	0.2	0.16	0.32	0	0	0.3	0.15	0.61	1.02
Solyc00g020440	0	0	0	0	0	0	0	0	0	0	0	0	0	0	0	0	0	0	0	0
Solyc00g020540	0	0	0	0.14	0.05	0	0	0	0.06	0	0	0	0	0	0	0	0	0	0	0
Solyc00g020840	0.11	0.11	0	0.13	0	0	0.26	0	0	0	0.19	0	0	0	0	0	0.12	0	0.1	0.2
Solyc00g020940	0	0	0	0	0	0	0	0	0	0	0	0	0	0	0	0	0	0	0	0
Solyc00g020950	0	0	0	0	0	0	0	0	0	0	0	0	0	0	0	0	0	0	0	0
Solyc00g020960	0	0	0	0	0	0	0	0	0	0	0	0	0	0	0	0	0	0	0	0
Solyc00g020970	0	0	0	0	0	0	0	0	0	0	0	0	0	0	0	0	0	0	0	0
Solyc00g020980	0	0	0	0	0	0	0	0	0	0	0	0	0	0	0	0	0	0	0	0
Solyc00g020990	0	0	0	0	0	0	0	0	0	0	0	0	0	0	0	0	0	0	0	0
Solyc00g021490	0	0	0	0	0	0	0	0	0	0	0	0	0	0	0	0	0	0	0	0
Solyc00g021500	0	0	0	0	0	0	0	0	0	0	0	0	0	0	0	0	0	0	0	0
Solyc00g021510	0	0	0	0	0	0	0	0	0	0	0	0	0	0	0	0	0	0	0	0
Solyc00g021520	0	0	0	0	0	0	0	0	0	0	0	0	0	0	0	0	0	0	0	0
Solyc00g021530	0	0	0	0	0	0	0	0	0	0	0	0	0	0	0	0	0	0	0	0
Solyc00g021630	1.04	1.07	2.12	0.94	0.3	0.45	1.41	0.31	1.81	1.28	4.42	5.39	4.94	4.22	0.4	0.33	0.57	0.29	1.16	1.21
Solyc00g021640	0.51	0.35	0.79	1.02	0.58	0.26	1.29	0.54	1.65	2.23	5.09	5.44	5.92	5.04	1.14	0.94	1.11	0.64	1.72	1.94
Solyc00g021650	0	0	0	0	0	0	0	0	0	0	0	0	0	0.43	0	0	0	0	0	23.9
Solyc00g021660	0	0	0	0	0	0	0	0	0	0	0	0	0	0	0	0	0	0	0	0
Solyc00g022070	0	0	0	0	0	0	0	0	0.77	0	0.94	0	0.64	0.64	0	0.71	0.61	0.63	0	0
Solyc00g022080	0	0	0	0	0	0	0	0	0.56	0	0	0	0	0	0	0	0	0	0	0
Solyc00g022090	0	0	0	0	0	0	0	0	0	0	0	0.36	0.55	0.28	0	0	0	0	0.21	0
Solyc00g022100	1.6	2.18	3.1	3.4	1.81	2.87	5.55	5.97	1.48	1.25	6.92	5.51	6.94	8.41	2.47	1.13	0.96	2.6	3.95	3.78
Solyc00g022110	3.92	4.19	12.96	12.86	4.45	5.06	18.7	18.74	6.38	5.03	13.67	11.99	17.61	16.67	11.83	14.17	34	33.23	65.89	64.96
Solyc00g022920	0	0	0	0	0	0	0	0	0	0	0	0	0	0	0	0	0	0	0	0
Solyc00g023020	0	0	0	0	0	0	0	0	0	0	0	0	0	0	0	0	0	0	0	0
Solyc00g023030	0	0	0	0	0	0	0	0	0	0	0	0	0	0	0	0	0	0	0	0
Solyc00g023040	0	0	0	0	0	0	0	0	0	0	0	0	0	0	0	0	0	0	0	0
Solyc00g023050	0	0	0	0	0	0	0	0	0	0	0	0	0	0	0	0	0	0	0	0
Solyc00g023250	0	0	0	0	0	0	0	0	0	0	0	0	0	0	0	0	0	0	0	0
Solyc00g023260	0	0	0	0	0	0	0	0	0	0	0	0	0	0	0	0	0	0	0	0
Solyc00g023270	0	0	0	0	0	0	0	0	0	0	0	0	0	0	0	0	0	0	0	0
Solyc00g023470	0	0	0	0	0	0	0	0	0	0	0	0	0	0	0	0	0	0	0	0
Solyc00g023570	0	0	0	0	0	0	0	0	0	0	0	0	0	0	0	0	0	0	0	0
Solyc00g023580	0	0	0	0	0	0	0	0	0.46	0	0.56	0	0.38	0.38	0.51	0	0	0	0	0
Solyc00g023590	0.08	0	0	0	0.18	0	0	0.1	0	0.11	0	0.12	0	0	0	0	0	0	0.14	0
Solyc00g023600	0	0	0	0	0	0	0	0	0	0	0	0	0	0	0	0	0	0	0	0
Solyc00g023700	0.14	0	0.33	0.51	0.16	0	0	0	0.4	0.2	0	0	0.16	0.17	0	0.18	0	0	0.38	0
Solyc00g023710	0	0	0	0	0	0	0	0	0	0.17	0.21	0	0	0.14	0	0	0	0	0	0.22
Solyc00g024010	0	0	0	0	0	0	0	0	0	0	0	0	0	0	0	0	0	0	0	0
Solyc00g024020	0	0	0	0	0	0	0	0	0	0	0	0	0	0	0	0	0	0	0	0
Solyc00g024030	0	0	0	0	0	0	0	0	0	0	0	0	0	0	0	0	0	0	0	0
Solyc00g024040	0	0	0	0	0	0	0	0	0	0	0	0	0	0	0	0	0	0	0	0
Solyc00g024050	0	0	0	0	0	0	0	0	0	0	0	0	0	0	0	0	0	0	0	0
Solyc00g024150	73.98	76.98	152.48	149.8	312.01	318.76	6.01	6.01	50.85	47.85	55.79	47.71	31.96	29.01	43.96	41.9	75.11	77.51	54.53	52.9
Solyc00g024160	0	0	0.12	0	0	0	0	0	0	0	0	0	0	0	0	0	0	0	0	0.37
Solyc00g024170	0	0	0.31	0	0	0	0	0	0	0	0	0	0	0	0	0	0	0	0	0
Solyc00g024370	0	0	0	0	0	0	0	0	0	0	0	0	0	0	0	0	0	0	0	0
Solyc00g024570	0	0.05	0	0	0	0	0	0	0	0	0	0	0	0	0	0	0	0	0	0
Solyc00g024670	0	0	0	0	0	0	0	0	0	0	0	0	0	0	0	0	0	0	0	0
Solyc00g024680	0	0	0	0	0	0	0	0	0	0	0	0	0	0	0	0	0	0	0	0
Solyc00g024690	0	0	0	0	0	0	0	0	0	0	0	0	0	0	0	0	0	0	0	0
Solyc00g025290	10.01	8.26	9.8	10.3	9.95	9.73	14.12	13.68	9.01	8.64	9.52	9.58	17.93	12.97	10.55	7.82	26.87	28.62	16.09	13.47
Solyc00g025300	0	0	0	0	0	0	0	0	0	0	0	0	0	0	0	0	0	0	0	0
Solyc00g025400	0	0	0	0	0	0	0	0.14	0	0	0	0	0	0.14	0	0	0.13	0.13	0.32	0
Solyc00g025500	0	0	0	0	0	0	0	0	0	0	0	0	0	0	0	0	0	0	0	0
Solyc00g025510	0	0	0	0	0	0	0	0	0	0	0	0	0	0	0	0	0	0	0	0
Solyc00g025520	0	0	0	0	0	0	0	0	0	0	0	0	0	0	0	0	0	0	0	0
Solyc00g025530	0	0	0	0	0	0	0	0	0	0	0	0	0	0	0	0	0	0	0	0
Solyc00g025540	0	0	0	0	0	0	0	0	0	0	0	0	0	0	0	0	0	0	0	0
Solyc00g025650	0	0	0	0	0	0	0	0	0	0	0	0	0	0	0	0	0	0	0	0
Solyc00g025660	0	0	0	0	0	0	0	0	0	0	0	0	0	0	0	0	0	0	0	0
Solyc00g026160	0.05	0.05	0.18	0.06	0	0	1.21	0.25	0	0	0	0	0	0	0	0	0.06	0	0.05	0
Solyc00g026860	0	0	0	0	0	0	0	0	0	0	0	0	0	0	0	0	0	0	0	0
Solyc00g026870	0	0	0	0	0	0	0	0	0	0	0	0	0	0	0	0	0	0	0	0
Solyc00g026880	0	0	0	0	0	0	0	0	0	0	0	0	0	0	0	0	0	0	0	0
Solyc00g026890	0	0	0	0	0	0	0	0	0	0	0	0	0	0	0	0	0	0	0	0
Solyc00g026900	0	0	0	0	0	0	0	0	0	0	0	0	0	0	0	0	0	0	0	0
Solyc00g027120	0.1	0	0	0	0	0	0	0	0	0	0	0	0	0	0	0	0	0	0	0
Solyc00g027130	0.7	0.72	0.27	0	0	0	0	0	0	0.11	0.13	0	0.09	0	0.12	0	0	0	0.41	0.43
Solyc00g027140	0	0.3	0.06	0	0	0.06	0.12	0.17	0	0	0.08	0	0.06	0.11	0	0	0.05	0.05	0.04	0.31
Solyc00g027640	0	0	0	0	0	0	0	0	0	0	0	0	0	0	0	0	0	0	0	0
Solyc00g027650	0	0	0	0	0	0	0	0	0	0	0	0	0	0	0	0	0	0	0	0
Solyc00g027660	0	0	0	0	0	0	0	0	0	0	0	0	0	0	0	0	0	0	0	0
Solyc00g027670	0	0	0	0	0	0	0	0	0	0	0	0	0	0	0	0	0	0	0	0
Solyc00g027770	18.34	17.75	21.52	22.41	9.64	10.08	22.08	20.07	25.73	23.29	29.84	28.51	46.77	45.27	38.38	34.42	25.66	27.57	31.35	33.09
Solyc00g027870	0	0	0	0	0	0	0	0	0	0	0	0	0	0	0	0	0	0	0	0
Solyc00g027970	0	0	0	0	0	0	0	0	0	0	0	0	0	0	0	0	0	0	0	0
Solyc00g027980	0	0	0	0	0	0	0	0	0	0	0	0	0	0	0	0	0	0	0	0
Solyc00g027990	0	0	0	0	0	0	0	0	0	0	0	0	0	0	0	0	0	0	0	0
Solyc00g028090	0	0	0	0	0	0	0	0	0	0	0	0	0	0	0	0	0	0	0	0
Solyc00g028100	0	0	0	0	0	0	0	0	0	0	0	0	0	0	0	0	0	0	0	0
Solyc00g028110	0	0	0	0	0	0	0	0	0	0	0	0	0	0	0	0	0	0	0	0
Solyc00g028120	0	0	0	0	0	0	0	0	0	0	0	0	0	0	0	0	0	0	0	0
Solyc00g028420	0	0	0	0	0	0	0	0	0	0	0	0	0	0	0	0	0	0	0	0
Solyc00g028520	0	0	0	0	0	0	0	0	0	0	0	0	0	0	0	0	0	0	0	0
Solyc00g028530	0	0	0	0	0	0	0	0	0	0	0	0	0	0	0	0	0	0	0	0
Solyc00g028540	0	0	0	0	0	0	0	0	0	0	0	0	0	0	0	0	0	0	0	0
Solyc00g028550	0	0	0	0	0	0	0	0	0	0	0	0	0	0	0	0	0	0	0	0
Solyc00g028560	0	0	0	0	0	0	0	0	0	0	0	0	0	0	0	0	0	0	0	0
Solyc00g028760	0	0	0	0	0	0	0	0	0	0	0	0	0	0	0	0	0	0	0	0
Solyc00g028960	1.64	2.8	0	0	0.31	0.32	0	0.33	0	0	0	0	0	0	0	0	0	0	0	0
Solyc00g029060	0	0	0	0	0	0	0	0	0	0	0	0	0	0	0	0	0	0	0	0
Solyc00g029070	0	0	0	0	0	0	0	0	0	0	0	0	0	0	0	0	0	0	0	0
Solyc00g029080	0	0	0	0	0	0	0	0	0	0	0	0	0	0	0	0	0	0	0	0
Solyc00g029090	0	0	0	0	0	0	0	0	0	0	0	0	0	0	0	0	0	0	0	0
Solyc00g029190	3.48	3.1	2.07	2.13	1.68	1.28	1.51	1.33	0	0.1	0	0.22	0.08	0.09	0.11	0.09	0	0	0	0
Solyc00g029290	0	0	0	0	0	0	0	0	0	0	0	0	0	0	0	0	0	0	0	0
Solyc00g029300	0	0	0	0	0	0	0	0	0	0	0	0	0	0	0	0	0	0	0	0
Solyc00g029500	0	0	0	0	0	0	0	0	0	0	0	0	0	0	0	0	0	0	0	0
Solyc00g029800	0	0	0	0	0	0	0	0	0	0	0	0	0	0	0	0	0	0	0	0
Solyc00g030000	0.11	0	0.33	0.07	0	0	0.14	0.27	0	0	0	0	0	0	0	0	0	0	0	0
Solyc00g030100	0	0	0	0	0	0	0	0	0	0.69	0	0	0	0	0	0	0	0	0	0
Solyc00g030110	0	0	0	0	0	0	0	0	0	0	0	0	0	0	0	0	0	0	0	0
Solyc00g030210	0	0	0	0	0	0	0	0	0	0	0	0	0	0	0	0	0	0	0	0
Solyc00g030510	909.95	891.42	1025.24	993.06	0.35	0.36	2.15	2	0.77	1.3	0.42	0.64	3.34	4	1.33	1.26	0.6	0.28	0	0
Solyc00g030520	10.12	10.8	9.54	7.94	3.07	3.43	5.55	4.6	12.7	8.58	8.42	5.92	9.11	5.14	5.65	6.44	3.88	3.24	5.28	5.16
Solyc00g030820	0	0.26	0.59	0	0.57	0.29	0.3	0	0	0	0	0.37	0.29	0	0	0.32	0.27	0	0.22	0.23
Solyc00g031020	0	0	0	0	0	0	0	0	0	0	0	0	0	0	0	0	0	0	0	0
Solyc00g031030	0	0	0	0	0	0	0	0	0	0	0	0	0	0	0	0	0	0	0	0
Solyc00g031040	0	0	0	0	0	0	0	0	0	0	0	0	0	0	0	0	0	0	0	0
Solyc00g031050	0	0	0	0	0	0	0	0	0	0	0	0	0	0	0	0	0	0	0	0
Solyc00g031060	0	0	0	0	0	0	0	0	0	0	0	0	0	0	0	0	0	0	0	0
Solyc00g031360	0	0	0	0	0	0	0	0	0	0	0	0	0	0	0	0	0	0	0	0
Solyc00g031370	0	0	0	0	0	0	0	0	0	0	0	0	0	0	0	0	0	0	0	0
Solyc00g031380	0	0	0	0	0	0	0	0	0	0	0	0	0	0	0	0	0	0	0	0
Solyc00g031390	0	0	0	0	0	0	0	0	0	0	0	0	0	0	0	0	0	0	0	0
Solyc00g031490	0	0	0	0	0	0	0	0	0	0	0	0	0	0	0	0	0	0	0	0
Solyc00g031500	0	0	0	0	0	0	0	0	0	0	0	0	0	0	0	0	0	0	0	0
Solyc00g031700	0	0	0	0	0	0	0	0	0	0	0	0	0	0	0	0	0	0	0	0
Solyc00g031710	0	0	0	0	0	0	0	0	0	0	0	0	0	0	0	0	0	0	0	0
Solyc00g031720	0	0	0	0	0	0	0	0	0	0	0	0	0	0	0	0	0	0	0	0
Solyc00g031730	0	0	0	0	0	0	0	0	0	0	0	0	0	0	0	0	0	0	0	0
Solyc00g032030	1.15	0.59	1.56	1.15	0	0	0.92	0.46	0.53	0	0	0.28	1.32	0.67	0.89	2.44	1.25	0.86	1.37	1.42
Solyc00g032230	0	0	0	0	0	0	0	0	0	0	0	0	0	0	0	0	0	0	0	0
Solyc00g032940	0	0	0	0	0	0	0	0	0	0	0	0	0	0	0	0	0	0	0	0
Solyc00g033460	14.51	15.43	4.92	3.28	0.91	1.06	0	0	6.97	3.85	0.77	1.52	0.26	0	0.18	0.15	0	0	0	0
Solyc00g033860	0	0	0	0	0	0	0	0	0	0	0	0	0	0	0	0	0	0	0	0
Solyc00g033870	0	0	0	0	0	0	0	0	0	0	0	0	0	0	0	0	0	0	0	0
Solyc00g033880	0	0	0	0	0	0	0	0	0	0	0	0	0	0	0	0	0	0	0	0
Solyc00g033890	0	0	0	0	0	0	0	0	0	0	0	0	0	0	0	0	0	0	0	0
Solyc00g033990	0	0	0	0	0	0	0	0	0	0	0	0	0	0	0	0	0	0	0	0
Solyc00g034000	0	0	0	0	0	0	0	0	0	0	0	0	0	0	0	0	0	0	0	0
Solyc00g034010	0	0	0	0	0	0	0	0	0	0	0	0	0	0	0	0	0	0	0	0
Solyc00g034810	0	0	0	0	0	0	0.3	0.15	0	0	0	0	0	0	0	0	0	0	0	0
Solyc00g035010	0	0	0	0	0	0	0	0	0	0	0	0	0	0	0	0	0	0	0	0
Solyc00g035020	0	0	0	0	0	0	0	0	0	0	0	0	0	0	0	0	0	0	0	0
Solyc00g036320	0.27	0.28	0.32	0	0	0	0	0	0	0	0	0	0	0	0	0	0	0	0	0
Solyc00g036520	0	0	0.18	0.18	0	0	0	0	0	0	0	0	0	0	0	0.19	0.17	0	0.27	0.85
Solyc00g036530	0	0	0	0	0	0	0	0	0	0	0	0	0	0	0	0	0	0	0	0
Solyc00g036540	4.24	2.79	4.93	5.79	4.8	6.29	1.09	0.73	3.36	2.98	17.42	14.28	21.87	20.61	5.13	6.16	3.94	5.78	12.11	14.55
Solyc00g036740	0	0	0	0	0	0	0	0	0	0	0	0	0	0	0	0	0	0	0	0
Solyc00g036750	0	0	0	0	0	0	0	0	0	0	0	0	0	0	0	0	0	0	0	0
Solyc00g036760	0	0	0	0	0	0	0	0	0	0	0	0	0	0	0	0	0	0	0	0
Solyc00g036960	0	0	0	0	0	0	0	0	0	0	0	0	0.21	0	0	0	0	0	0	0
Solyc00g038390	0	0	0	0	0	0	0	0	0	0	0	0	0	0	0	0	0	0	0	0
Solyc00g039290	0	0.1	0	0	0	0	0	0	0.13	0	0	0	0	0	0	0	0	0	0	0
Solyc00g039990	5.54	4.99	7.67	6.16	4.93	5.64	4.91	5.22	6.4	5.93	5.81	5.84	6.81	6.85	6.71	7.72	4.72	2.82	9.15	8.53
Solyc00g040290	0	0	0	0	0	0	7.35	7.83	0	0	0	0	0	0	0	0	0	0	0	0
Solyc00g040390	0	0	0	0	0	0	4.85	5.29	0	0	0	0	0	0	0	0	0	0	0	0
Solyc00g040490	0	0	0	0	0	0	0	0	0	0	0	0	0	0	0	0	0	0	0	0
Solyc00g041090	0	0.3	0.34	0	0	0	0	0	0	0	0	0	0	0	0	0	0	0	0	0
Solyc00g041190	0	0	0	0	0	0	0	0	0	0	0	0	0	0	0	0	0	0	0	0
Solyc00g041200	0	0	0	0	0	0	0	0	0	0	0	0	0	0	0	0	0	0	0	0
Solyc00g041210	0	0	0	0	0	0	0	0	0	0	0	0	0	0	0	0	0	0	0	0
Solyc00g041220	0	0	0	0	0	0	0	0	0	0	0	0	0	0	0	0	0	0	0	0
Solyc00g042120	0	0	0	0	0	0	0	0	0	0	0	0	0	0	0	0	0	0	0	0
Solyc00g042130	0	0	0	0	0	0	0	0	0	0	0	0	0	0	0	0	0	0	0	0
Solyc00g042140	0	0	0	0	0	0	0	0	0	0	0	0	0	0	0	0	0	0	0	0
Solyc00g042640	0.04	0.08	0.04	0.18	0.09	0	0	0	0	0.11	0	0	0.09	0.04	0	0.05	0	0	0.03	0
Solyc00g042840	0.98	1	0.87	0.36	0.34	0.17	2.52	2.88	2.29	2.11	4.07	3.1	4.31	3.21	1.5	0.95	0.65	1.35	0.13	0.07
Solyc00g042850	0.14	0	0	0.16	0	0	0	0.16	0	0	0	0	0	0	0	0	0	0	0	0.13
Solyc00g044350	15.17	20.64	8.72	7.38	45.92	40.22	0	0	1.62	2.81	0.56	1.23	0.96	0.38	1.28	0.42	0.18	0.19	0	0
Solyc00g044550	0	0	0.57	0	0	0.57	0	0	0	0	0	0	0.56	0	0	0	0	0	0	0
Solyc00g044750	0.85	1.6	0.17	0.34	0.16	0	0	0	0	0.2	0.48	0	0	0	0.22	0.72	0.15	0.16	1.01	1.05
Solyc00g045570	0	0.11	0	0	0	0.12	4.63	7.25	0.58	0.44	0.53	0.31	0.12	0.12	0.48	0.27	0.79	0.47	13.25	13.2
Solyc00g046570	0	0.16	0	0	0.18	0	0.19	0.37	0	0	0.26	0	0	0.72	0	0	0.17	0	0.14	0.14
Solyc00g046580	0.13	0.13	0.08	0.08	0	0	0	0.08	0.09	0	0	0	0	0	0.2	0	0	0	0	0.06
Solyc00g046980	0	0	0	0	0	0	0	0	0	0	0	0	0	0	0	0	0	0	0	0
Solyc00g047180	0	0	1.15	1.98	0	0	0.79	0.4	0	0	0	0.49	0	0	0	0	0	0	0	0
Solyc00g047190	0	0	0	0	0	0	0	0	0	0	0	0	0	0	0	0	0	0	0	0
Solyc00g047200	4.01	0.37	2.54	3.06	0.41	0	3.94	6.12	2.53	4.61	6.79	8.07	10.88	13.05	1.69	1.86	1.58	3.28	3.89	4.05
Solyc00g047700	228.45	231.14	230.8	240.52	146.26	155.73	239.86	242.14	498.92	488.38	275.14	237.9	167.8	169.21	184.34	186.61	203.58	202.77	201.23	192.11
Solyc00g047810	0.24	0.24	0	0	0	0	0	0	0	0	0.4	0	0.54	0.81	0	0	0.51	0.26	0.42	1.09
Solyc00g048410	0	0	0	0.48	0	0	0	0	0	0	0	0	0	0	0	0	0	0	0	0
Solyc00g048510	0	0.3	0.51	0.52	0.33	1.01	2.11	2.98	3.85	2.26	2.47	2.16	0.34	0	0.68	0.37	1.11	1.15	0.65	0.68
Solyc00g049210	0.14	0.15	0.22	0.23	0.22	0	0.46	0.35	0.4	0.34	1.14	1.42	2.32	2.39	0.07	0	0.21	0.05	0.34	0.58
Solyc00g049220	0	0	0	0	0	0	0	0	0	0.58	0	0	0.47	0	0	0	0	0	0	0
Solyc00g049520	23.36	27.58	9.59	10.89	22.97	23	78.33	78.43	17.61	14.96	47.98	40.77	62.85	59.46	116.67	115.29	118.15	103.65	29.94	26.19
Solyc00g049620	0	0	0	0	0	0	0	0	0	0	0	0	0	0	0	0	0	0	0	0
Solyc00g049920	0	0	0	0	0	0	0	0	0	0	0	0	0	0	0	0	0	0	0	0
Solyc00g050020	0	0	0	0	0	0	0	0	0	0	0	0	0	0	0	0	0	0	0	0
Solyc00g050030	0	0	0	0	0	0	0	0	0	0	0	0	0	0	0	0	0	0	0	0
Solyc00g050130	5.12	5.11	4.38	5.61	7.07	6.84	25.33	25	8.81	8.5	7.42	6.55	6.16	5.7	6.85	7.61	2.75	3.12	5.27	5.25
Solyc00g050430	4.44	5.23	5.09	3.1	0.77	1	22.41	22.75	56.28	50.74	43.51	38.89	9.05	9.39	1.23	3.21	0.13	0.28	0	0.11
Solyc00g052430	0.76	0.35	1.2	0.91	1.49	0.72	1.99	2.32	0.57	0.87	0.93	0.81	1.42	1.19	0.74	0.26	0.67	0.54	1.66	1.08
Solyc00g052530	0	0	0.25	0	0	0	0	0.52	0	0	0	0.32	0.5	0	0	0	0	0	0.19	1.01
Solyc00g052540	0	0.27	0	0	0	0	0	0	0	0	0	0	0	0	0	0	0	0	0	0.25
Solyc00g052940	13.45	11.17	6.35	6.44	2.24	1.46	2.18	2.75	0.11	0.11	0.13	0	0	0	0	0	0	0	0	0
Solyc00g053440	17.07	14.45	14.72	12.68	13.34	12.06	27.2	28.93	24.88	21.3	16.94	19.96	22.45	18.85	44.66	48.46	38.8	45.15	124.46	124.31
Solyc00g053740	0.26	0	0	0	0	0	0	0	0	0	0	0	0	0	0	0	0	0	0	0
Solyc00g055940	0	0	0	0	0	0	0	0	0	0	0	0	0	0	0	0	0	0	0	0
Solyc00g055950	0	0	0	0	0	0	0	0	0	0	0	0	0	0	0	0	0	0	0	0
Solyc00g055960	0	0	0	0	0	0	0	0	0	0	0	0	0	0	0	0	0	0	0	0
Solyc00g055970	0	0	0	0	0	0	0	0	0	0	0	0	0	0	0	0	0	0	0	0
Solyc00g055980	0	0	0	0	0	0	0	0	0	0	0	0	0	0	0	0	0	0	0	0
Solyc00g056180	0	0	0	0	0	0	0	0	0	0	0	0	0	0	0	0	0	0	0	0
Solyc00g056680	0.48	0.38	0.55	0.38	0.42	0.55	0.89	1.14	1.39	1.19	1.43	1.4	1.21	1.34	1.06	0.81	1.15	1.37	2.82	2.64
Solyc00g057280	0.18	0	0	0	0	0	0	0	0	0	0	0	0	0	0	0	0	0	0	0
Solyc00g057880	9.41	10.5	9.2	7.17	10.67	9.14	7.45	9.23	17.49	13.83	16.66	11.67	15.95	13.83	14.17	12.78	8.82	8.17	8.18	7.71
Solyc00g058280	0	0	0.83	0.61	0	0	0	0	0	0	0	0	0	0	0	0	0	0	0	0
Solyc00g058480	0	0	0	0	0	0	0	0	0	0	0	0	0	0	0	0	0	0	0	0
Solyc00g058490	0.3	0.2	0.12	0.24	0.11	0.11	0	0	0	0.14	0.67	0	0	0.11	0.15	0.25	0.11	0	0.18	0.09
Solyc00g058890	6.44	6.37	12.8	13.42	49.67	55.14	19.94	21.16	0	0	0	0	0	0	0	0	0	0	0	0
Solyc00g058900	3.39	2.93	0	0	0	0	0	0	0	0	0	0	0	0	0	0	0	0	0	0
Solyc00g059100	3.38	3.23	2.44	1.98	0.68	0.87	7.84	7.56	2.91	2.53	5.08	4.21	4.82	5.11	4.28	3.44	4.07	3.46	4.81	4.37
Solyc00g059500	23.47	28.21	31.38	36.85	15.29	15.58	25.35	30.24	28.46	24.31	21.35	14.71	21.87	29.45	28.01	27.22	22.28	27.69	21.65	24.67
Solyc00g060700	0	0	0	0	0	0	0	0	0	0	0	0	0	0	0	0	0	0	0	0
Solyc00g060710	0	0	0	0	0	0	0	0	0	0	0	0	0	0	0	0	0	0	0	0
Solyc00g060810	0	0	0	0	0	0.12	0	0	0	0	0.17	0	0	0.12	5.39	6.94	18.55	18.4	371.84	377.87
Solyc00g062710	0	0	0	0	0	0	0	0	0.39	0	0	0	0	0	0	0	0	0	0	0
Solyc00g063110	0	0	0	0	0	0	15.18	13.12	0	0	0	0	0	0	0	0	0	0	0	0
Solyc00g063510	0	0	0	0	0	0	0	0	0	0	0	0	0	0	0	0	0	0	0	0
Solyc00g065510	0	0	0	0	0	0	0	0	0	0	0	0	0	0	0	0	0	0	0	0
Solyc00g065610	0	0	0	0	0	0	0	0	0	0	0	0	0	0	0	0	0	0	0	0
Solyc00g065620	0	0	0	0	0	0	0	0	0	0	0	0	0	0	0	0	0	0	0	0
Solyc00g065630	0	0	0	0	0	0	0	0	0	0	0	0	0	0	0	0	0	0	0	0
Solyc00g065930	0	0	0	0	0	0	0	0	0	0	0	0	0	0	0	0	0	0	0	0
Solyc00g065940	0	0	0	0	0	0	0	0	0	0	0	0	0	0	0	0	0	0	0	0
Solyc00g066140	0	0	0	0	0	0	0	0	0	0	0	0	0	0	0	0	0	0	0	0
Solyc00g066150	0	0	0	0	0	0	0	0	0	0	0	0	0	0	0	0	0	0	0	0
Solyc00g066350	3.31	2.26	0	0	0	0	0	0	0	0	0	0	0	0	0	0	0	0	0	0
Solyc00g066360	2.3	3.17	0	0	0	0	0	0	0	0	0	0	0	0	0	0	0	0	0	0
Solyc00g066370	0	0	0	0	0	0	0	0	0	0	0	0	0	0	0	0	0	0	0	0
Solyc00g067470	3.1	3.7	2.41	3.1	1.76	1.79	3.1	5.58	2.87	4.36	2.63	1.53	5.93	5.97	3.19	2.63	3.37	5.23	2.76	0.96
Solyc00g068970	0	0	0	0	0	0	0	0	0	0	0	0	0	0	0	0	0	0	0	0
Solyc00g068980	1.55	1.06	3.01	3.1	3.52	1.19	8.69	4.96	6.45	3.63	48.17	29.75	57.56	34.03	3.98	3.95	4.49	5.23	4.6	3.82
Solyc00g069680	0	0	0	0	0	0	0	0	0	0	0	0	0	0	0	0	0	0	0	0
Solyc00g069880	0.31	0.11	0.12	0.12	0	0	0.12	0	0	0	0.17	0	0.12	0.12	0.16	0	0.22	0.35	0.46	0.48
Solyc00g070680	0	0	0	0	0	0	0	0	0	0	0	0	0	0	0	0	0	0	0	0
Solyc00g071180	674.75	639.68	58.91	54.95	0.61	1.06	214.44	202.34	10.7	11.27	20.7	17.01	0.79	0.26	1.18	0.49	0.5	0.52	0	0
Solyc00g071580	0	0	0	0	0	0	0	0	0	0	0	0	0	0	0	0	0	0	0	0
Solyc00g071590	0	0	0	0	0	0	0	0	0	0	0	0	0	0	0	0	0	0	0	0
Solyc00g071600	0	0	0	0	0	0	0	0	0	0	0	0	0	0	0	0	0	0	0	0
Solyc00g072100	24.34	22.64	21.43	20.05	13.79	14.35	16.19	17.65	54.62	47.32	33.74	25.48	27.61	23.2	26.76	28.7	13.68	14.37	9.25	8.88
Solyc00g072400	0	0	0	0	0.08	0	782.88	750.88	0	0	0	0	0	0	0	0.09	0	0	0	0
Solyc00g072800	0.27	0.14	0.31	0.65	0	0	0.32	0.16	0.56	0	0.23	0.6	0.46	0	0.42	0.34	0.15	0	0.72	0.5
Solyc00g073200	0	0	0	0	0	0	0	0	0	0	0	0	0	0	0	0	0	0	0	0
Solyc00g073900	0	0	0	0	0	0	0	0	0	0	0	0	0	0	0	0	0	0	0	0
Solyc00g073910	0	0	0	0	0	0	0	0	0	0	0	0	0	0	0	0	0	0	0	0
Solyc00g074210	0	0	0.22	0.23	0	0	0	0	0	0	0	0.28	0	0	0.88	0	0	0.21	0.34	0
Solyc00g074810	0	0	0	0	0	0	0	0	0	0	0	0	0	0	0	0	0	0	0	0
Solyc00g074820	0	0	0	0	0	0	0	0	0	0	0	0	0	0	0	0	0	0	0	0
Solyc00g074830	0	0	0	0	0	0	0	0	0	0	0	0	0	0	0	0	0	0	0	0
Solyc00g075030	10.27	9.11	90.09	87.38	0	0	0.21	0.72	0	0.12	0	0	0	0.1	0	0	0	0	0	0
Solyc00g075040	0.76	0.36	1.96	1.81	0	0	0	0	0	0	0	0	0	0	0	0	0	0	0	0
Solyc00g075440	1.84	1.15	0.36	0.73	0.58	0.71	226.52	228.92	0.71	0	0	0.15	0	0	0.16	0	0	0	0.09	0.09
Solyc00g075450	1.08	0.83	1.88	2.26	0.61	0.62	480.91	461.86	0.75	0.38	0.91	0	0.62	1.86	4.15	3.08	2.05	2.72	1.44	1
Solyc00g076250	0	0	0	0	0	0	0	0	0	0	0	0	0	0	0	0	0	0	0	0
Solyc00g079050	0	0	0	0	0	0	0	0	0	0	0	0	0	0	0	0	0	0	0	0
Solyc00g080550	0	0	0	0	0	0	0	0	0	0	0	0	0	0	0	0	0	0	0	0
Solyc00g080750	4.59	4.36	12.72	12.79	3.6	4.92	0.5	0.1	2.43	1.99	1.13	1.23	1.34	1.25	0.39	0.21	0.45	0.28	0	0
Solyc00g082150	42.37	39	34.26	32.42	36.65	38.54	71.26	68.91	70.42	67.05	76.88	63.21	54.94	55.85	69.87	66.22	51.49	51.9	38.62	36.97
Solyc00g082550	0	0	0	0	0	1.93	0	0.8	0	0	0	2.22	0	0.19	0	0	0	0	0	0
Solyc00g084650	0	0	0	0	0	0	0	0	0	0	0	0	0	0	0	0	0	0	0	0
Solyc00g084750	0.48	0.69	0.45	0.81	0.77	0.67	0.81	1.04	0.67	0.81	1.14	1.28	1.22	0.67	1.04	0.98	1.78	0.98	1.63	1.61
Solyc00g084760	0.87	0.76	1.44	1.64	0	0	0.3	0	0	0.35	0.21	0.73	0.86	0.86	0.38	0.95	0.94	0.28	0.11	0.57
Solyc00g084770	1.15	0.59	1.34	1.72	0	0	0	0.34	0.8	0	0	0	0.33	0.66	0.44	2.19	0.94	0.65	0.26	0.53
Solyc00g084870	2.38	2.28	3.28	1.78	4.88	3.77	1.25	2.31	2.88	2.71	1.26	1.75	2.89	2.4	1.14	2.64	1.45	1	0.4	0.14
Solyc00g085070	96.93	89.91	125.66	118.1	48.56	50.62	42.82	39.84	51.16	51.33	57.97	52.39	43.66	40.73	37.27	39.4	36.48	36.6	55.71	49.14
Solyc00g085370	0	0	0	0	0	0	0	0	0	0	0	0	0	0	0	0	0	0	0	0
Solyc00g085770	0	0	0	0	0	0	0	0	0	0	0	0	0	0	0	0	0	0	0	0
Solyc00g085780	0	0	0	0	0	0	0	0	0	0	0	0	0	0	0	0	0	0	0	0
Solyc00g088080	0	0	0	0	0	0	0	0	0	0	0	0	0	0	0	0	0	0	0	0
Solyc00g088090	0	0	0	0	0	0	0	0	0	0	0	0	0	0	0	0	0	0	0	0
Solyc00g088190	0	0	0	0	0	0	0	0	0	0	0	0	0	0	0	0	0	0	0	0
Solyc00g088200	0	0	0	0	0	0	0	0	0	0	0	0	0	0	0	0	0	0	0	0
Solyc00g088210	0	0	0	0	0	0	0	0	0	0	0	0	0	0	0	0	0	0	0	0
Solyc00g090110	0	0	0	0	0	0	0	0	0	0	0	0	0	0	0	0	0	0	0	0
Solyc00g090120	0	0	0	0	0	0	0	0	0	0	0	0	0	0	0	0	0	0	0	0
Solyc00g090130	0	0	0	0	0	0	0	0	0	0	0	0	0	0	0	0	0	0	0	0
Solyc00g090430	0	0.08	0	0	0	0	0	0.38	0	0	0	0.35	0	0.55	0	0	0	0.09	0	0
Solyc00g090630	0	0	0	0	0	0	0	0	0	0	0	0	0	0	0	0	0	0	0	0
Solyc00g090640	0	0	0	0	0	0	0	0	0	0	0	0	0	0	0	0	0	0	0	0
Solyc00g090650	0	0	0	0	0	0	0	0	0	0	0	0	0	0	0	0	0	0	0	0
Solyc00g090660	0	0	0	0	0	0	0	0	0	0	0	0	0	0	0	0	0	0	0	0
Solyc00g090860	0	0	0	0	0	0	77.07	72.13	0	0	0	0	0	0	0	0	0	0	0	0
Solyc00g090870	22.68	21.95	23.25	22.47	10.64	11.4	15.66	15.79	12.67	14.9	8.05	7.73	4.62	6.19	6.95	4.03	5.16	4.8	5.1	4.62
Solyc00g091170	11.64	9.74	7.18	7.46	18.59	14.86	14.04	13.53	19.39	17.76	11.94	12.74	4.99	4.61	4.17	2.91	1.79	1.72	1.41	1.2
Solyc00g092870	0	0	0	0	0	0	0	0	0	0	0	0	0	0	0	0	0	0	0	0
Solyc00g092880	0	0	0	0	0	0	0	0	0	0	0	0	0	0	0	0	0	0	0	0
Solyc00g092890	0	0	0	0	0	0	0	0	0	0	0	0	0	0	0	0	0	0	0	0
Solyc00g092900	0	0	0	0	0	0	0.29	0.38	0	0.11	0	0.35	0.37	0	0.12	0.1	0	0.09	0.07	0.15
Solyc00g093000	4.74	4.85	5.51	3.24	6.91	7.04	14.64	12.99	3.76	7.61	14.91	14.98	4.66	6.25	4.17	13.78	6.62	6.09	7.23	6.26
Solyc00g093100	0	0	0	0	0	0	0	0	0	0	0	0	0	0	0	0	0	0	0	0
Solyc00g093300	0	0.12	0	0	0.13	0	0	0	0	0	0	0	0	0	0	0	0	0	0	0
Solyc00g093310	1.21	0.62	1.06	2.9	0.69	0.35	0.73	1.09	0.84	1.28	0	0	0.69	0.7	1.4	0.77	0.33	0	0	0.28
Solyc00g094010	0	0	0	0	0	0	0	0	0	0	0	0	0	0	0	0	0	0	0	0
Solyc00g094020	0	0	0	0	0	0	0	0	0	0	0	0	0	0	0	0	0	0	0	0
Solyc00g094520	0.46	1.88	3.2	0	0	0	2.2	0.55	0	2.58	1.55	0	2.11	1.06	0.71	0.58	0.5	1.03	2.45	1.7
Solyc00g094530	0.44	0	0	0.26	0.25	0	0.26	1.31	1.21	0	2.22	3.55	2.26	1.52	0.34	0.28	0	0.49	0.58	1.21
Solyc00g094540	0	0	0	0	0	0	0	0.62	0	1.09	0	0.76	0	0	0	0.66	0	0	0	0
Solyc00g094550	0	0	0	0	0	0	0	0	0	0	0	0	0	0.42	0	0	0	0	0.32	0
Solyc00g094850	0	0	0	0	0	0	0	0	0	0	0	0	0	0	0	0	0	0	0	0
Solyc00g095450	0	0	0	0	0	0	0	0	0	0	0	0	0	0	0	0	0	0	0	0
Solyc00g095460	0	0	0	0	0	0	0	0	0	0	0	0	0	0	0	0	0	0	0	0
Solyc00g095760	0.26	0.7	0.5	0.51	0.48	0.59	15.44	15.83	8.15	8.26	2.02	1.51	0.59	0.59	2.36	1.62	1.02	0.86	1.36	1.57
Solyc00g095860	4.32	3.51	6.94	8.06	8.78	9.24	31.41	29.84	15.67	15.53	9.89	9.18	4.37	4.98	32.87	34.72	30.87	30.83	43.26	42.26
Solyc00g096060	0.84	0.43	0	0	0	0	13.31	10.78	0	0	0	0	0	0	0	0	0	0	0	0
Solyc00g096460	8.07	8.26	4.47	6.9	8.72	6.21	11.08	9.68	14.39	13.5	8.46	11.91	9.26	7.1	10.07	5.38	11.68	6.05	16.07	13.15
Solyc00g097260	0	0	0	0	0	0	0	0	0	0	0	0	0	0	0	0	0	0	0	0
Solyc00g097760	0	0	0	0	0	0	0	0	0	0	0	0	0	0	0	0	0	0	0	0
Solyc00g097960	6.19	4.75	6.53	4.63	8.12	5.81	3.48	3.02	8.85	4.08	4.92	5.99	2	1.34	3.88	2.71	2.31	1.52	0.52	2.5
Solyc00g098560	9.54	9.24	9.21	10.44	6.21	5.98	24	22.14	16.46	17.11	19.93	21.55	46.8	44.98	18.61	25.03	15.53	17.34	5.96	5.82
Solyc00g099160	0	0	0	0	0	0	0.29	0	0	0	0	0	0	0	0	0	0	0	0	0
Solyc00g099460	0	0	0	0	0	0	0	0	0	0	0	0	0	0	0	0	0	0	0	0
Solyc00g099470	0	0	0	0	0	0	0	0	0	0	0	0	0	0	0	0	0	0	0	0
Solyc00g099570	0	0	0	0	0	0	0	0	0	0	0	0	0	0	0	0	0	0	0	0
Solyc00g099580	1.48	1.52	0.72	0.37	2.1	2.28	0	0	1.29	1.13	0.1	0.64	0.07	0.14	0	0	0	0	0	0
Solyc00g099880	0	0	0	0	0	0	0	0	0	0	0	0	0	0	0	0	0	0	0	0
Solyc00g100880	0.1	0.1	0	0	0.11	0	1.37	1.26	0	0	0	0	0	0	0	0	0	0	0	0
Solyc00g101700	0	0	0	0	0	0	0	0	0	0	0	0	0	0	0	0	0	0	0	0
Solyc00g102000	0	0	0	0	0	0	0	0	0	0	0	0	0	0	0	0	0	0	0	0
Solyc00g102400	0.57	0.4	0.33	0.24	0.32	0.39	9.77	10.33	0.39	0.44	1.34	1.12	1.2	1.34	2.52	2.84	1.35	1.11	0.25	0.26
Solyc00g104200	0	0	0	0	0	0	0	0	0	0	0	0	0	0	0	0	0	0	0	0
Solyc00g104210	0	0	0	0	0	0	0	0	0	0	0	0	0	0	0	0	0	0	0	0
Solyc00g104310	0	0	0	0	0	0	0	0	0	0	0	0	0	0	0	0	0	0	0	0
Solyc00g104320	0	0	0	0	0	0	0	0	0	0	0	0	0	0	0	0	0	0	0	0
Solyc00g104330	0	0	0	0	0	0	0	0	0	0	0	0	0	0	0	0	0	0	0	0
Solyc00g104630	0	0	0	0	0	0	0	0	0	0	0	0	0	0	0	0	0	0	0	0
Solyc00g104730	0	0	0	0	0	0	0	0	0	0	0	0	0	0	0	0	0	0	0	0
Solyc00g104740	0	0	0	0	0	0	0	0	0	0	0	0	0	0	0	0	0	0	0	0
Solyc00g104940	0.95	1.56	0	0	0	0	0.23	0	0	0	0	0	0	0	0	0	0	0	0	0
Solyc00g105340	0.09	0	0	0	0.1	0	0.11	0	0	0	0	0	0	0	0.14	0	0	0	0	0
Solyc00g105350	0	0	0	0	0	0	0	0	0	0	0	0	0	0	0	0	0	0	0	0
Solyc00g105750	0.06	0	0	0.07	0	0	0	0	0	0	0	0	0.2	0	0	0	0	0	0	0
Solyc00g106650	9.1	9.7	10.59	13.16	10.32	11.39	25.5	22.74	16.3	20.25	14.77	25.73	18.71	13.14	15.78	10.61	9.88	7.67	11.47	9.12
Solyc00g107050	0	0	0	0	0	0	0	0	0.27	0	0	0	0	0.23	0	0	0	0	0	0
Solyc00g107550	0	0	0	0	0	0	0	0	0	0	0	0	0	0	0	0	0	0	0	0
Solyc00g108550	0	0	0.2	0.42	0	0.2	0	0.21	0	0	0	0.52	0	0.81	0	0.22	0	0	0	0
Solyc00g109450	0	0	0	0	0	0	0	0	0	0	0	0	0	0	0	0	0	0	0	0
Solyc00g109850	0	0	0	0	0	0	0	0	0	0	0	0	0	0	0	0	0	0	0	0
Solyc00g109860	0	0	0	0	0	0	0	0	0	0	0	0	0	0	0	0	0	0	0	0
Solyc00g110060	0	0	0	0	0	0	0	0	0	0	0	0	0	0	0	0	0	0	0	0
Solyc00g110070	0	0	0	0	0	0	0	0	0	0	0	0	0	0	0	0	0	0	0	0
Solyc00g110370	0	0	0	0	0	0	0	0	0	0	0	0	0	0	1.14	1.89	0	0	0	0
Solyc00g110870	8.85	11.51	13.08	12.27	7.77	5.88	64.27	56.95	6.9	7.57	3.87	4.58	3.9	2.64	0.54	0.82	0.19	0.07	0.16	0.11
Solyc00g111170	0	0	0	0	0	0	0	0	0	0	0	0	0	0	0	0	0	0	0	0
Solyc00g111270	0	0	0	0	0	0	0	0	0	0	0	0	0	0	0	0	0	0	0	0
Solyc00g111370	0	0	0	0	0	0	0	0	0	0	0	0	0	0	0	0	0	0	0	0
Solyc00g111770	0	0	0	0	0	0	0	0	0	0	0	0	0	0	0	0	0	0	0	0
Solyc00g111780	0	0	0	0	0	0	0	0	0	0	0	0	0	0	0	0	0	0	0	0
Solyc00g112180	0	0	0	0	0	0	0	0	0	0	0	0	0	0	0	0	0	0	0	0
Solyc00g112190	0.14	0.14	0.32	0.33	0.16	0.16	0.08	0	0.1	0	0.35	0.21	0.08	0.08	0	0.09	0	0	0	0
Solyc00g112490	0	0	0	0	0	0	0	0	0	0	0	0	0	0	0	0	0	0	0	0
Solyc00g112500	0	0	0	0	0	0	0	0	0	0	0	0	0	0	0	0	0	0	0	0
Solyc00g112600	0	0	0	0	0	0	0	0	0	0	0	0	0	0	0	0	0	0	0	0
Solyc00g112700	0	0	0	0	0	0	0	0	0	0	0	0	0	0	0	0	0	0	0	0
Solyc00g112710	0	0	0	0	0	0	0	0	0	0	0	0	0	0	0	0	0	0	0	0
Solyc00g112810	0	0	0	0	0	0	0	0	0	0	0	0	0	0	0	0	0	0	0	0
Solyc00g112820	0	0	0	0	0	0	0	0	0	0	0	0	0	0	0	0	0	0	0	0
Solyc00g112830	0	0	0	0	0	0	1.12	1.3	0.22	0	0	0.46	0	0	0.48	0.4	0	0	0	0
Solyc00g112930	0.79	1.07	0	0.31	0.3	0	12.61	15.11	1.82	0.37	1.33	1.16	1.51	0.61	3.24	3.67	0	0	0	0
Solyc00g113230	0	0	0	0	0	0	0	0	0	0	0	0	0	0	0	0	0	0	0	0
Solyc00g113330	0	0	0	0	0	0	0	0	0	0	0	0	0	0	0	0	0	0	0	0
Solyc00g113730	0	0	0	0	0	0	0	0	0	0	0	0	0	0	0	0	0	0	0	0
Solyc00g113740	0	0	0	0	0	0	0	0	0	0	0	0	0	0	0	0	0	0	0	0
Solyc00g113750	0	0	0	0	0	0	0	0	0	0	0	0	0	0	0	0	0	0	0	0
Solyc00g114550	0	0	0	0	0	0	0	0	0	0	0	0	0	0	0	0	0	0	0	0
Solyc00g116150	0	0	0	0	0	0	0	0	0	0	0	0	0	0	0	0	0	0	0	0
Solyc00g117450	1.18	1.47	1.37	0.63	1.48	1.81	0	0	0.18	0.18	0	0	0	0	0	0	0	0	0	0
Solyc00g117650	0	0	0	0	0	0	0	0	0	0	0	0	0	0	0	0	0	0	0	0
Solyc00g118680	0	0	0	0	0	0	0	0	0	0	0	0.27	0	0.42	0	0	0	0.41	0	0
Solyc00g118690	1.64	0.33	1.52	0.39	0.74	0	2.75	1.96	1.36	2.3	4.43	2.89	2.63	1.51	1.01	2.08	1.77	1.84	2.04	1.51
Solyc00g120120	0	0	0	0	0	0	0	0	0	0	0	0	0	0	0	0	0	0	0	0
Solyc00g120820	0	0	0	0	0	0	0	0	0	0	0	0	0	0	0	0	0	0	0	0
Solyc00g120830	0	0	0	0	0	0	0	0	0	0	0	0	0	0	0	0	0	0	0	0
Solyc00g120930	0	0	0	0	0	0	0	0	0	0	0	0	0	0	0	0	0	0	0	0
Solyc00g121230	0	0	0	0	0	0	0	0	0	0	0	0	0	0	0	0	0	0	0	0
Solyc00g121730	0	0	0	0	0	0	0	0	0	0	0	0	0	0	0	0	0	0	0	0
Solyc00g122530	0	0	0	0	0	0	0	0	0	0	0	0	0	0	0	0	0	0	0	0
Solyc00g123030	0	0	0	0	0	0	0	0	0	0	0	0	0	0	0	0	0	0	0	0
Solyc00g123040	0	0	0	0	0	0	0	0	0	0	0	0	0	0	0	0	0	0	0	0
Solyc00g123240	0	0	0	0	0	0	0	0	0	0	0	0	0	0	0	0	0	0	0	0
Solyc00g124840	0	0	0	0	0	0	0	0	0	0	0	0	0	0	0	0	0	0	0	0
Solyc00g124850	0	0	0	0	0	0	0	0	0	0	0	0	0	0	0	0	0	0	0	0
Solyc00g124860	0	0	0	0	0	0	0	0	0	0	0	0	0	0	0	0	0	0	0	0
Solyc00g125260	0	0	0	0	0	0	0	0	0	0	0	0	0	0	0	0	0	0	0	0
Solyc00g125270	0	0	0	0	0	0	0	0	0	0	0	0	0	0	0	0	0	0	0	0
Solyc00g125580	0	0.13	0	0	0	0.15	0.16	0	0	0	0	0.19	0	0	0.2	0	0	0	0	0
Solyc00g125980	0.84	2.14	0.97	2	0	0.97	13.06	7.52	1.16	1.18	10.63	8.64	10.08	11.11	12.89	6.92	11.35	10.82	9.3	6.96
Solyc00g125990	1.19	0.41	1.23	1.9	0.45	0.61	1.43	1.9	1.28	1.12	3.36	2.54	4.25	4.89	1.02	1.18	1.87	0.89	1.65	1.71
Solyc00g126000	2.23	4.57	6.49	9.35	5.06	5.15	22.77	21.4	14.69	13.32	7.56	6.58	7.68	7.08	12.89	22.7	23	19.44	14.88	15.47
Solyc00g126010	2.45	1.51	6.84	4.7	3.89	5.66	26.5	27.64	6.12	6.89	4.15	9.4	6.75	5.1	17.38	18.09	22.89	18.19	11.34	11.33
Solyc00g126420	0	0	0	0	0	0	0	0	0	0	0	0	0	0	0	0	0	0	0	0
Solyc00g126430	0	0	0	0	0	0	0	0	0	0	0	0	0	0	0	0	0	0	0	0
Solyc00g126440	0	0	0	0	0	0	0	0	0	0	0	0	0	0	0	0	0	0	0	0
Solyc00g127540	0	0	0	0	0	0	0	0	0	0	0	0	0	0	0	0	0	0	0	0
Solyc00g127550	0	0	0	0	0	0	0	0	0	0	0	0	0	0	0	0	0	0	0	0
Solyc00g127560	0	0	0	0	0	0	0	0	0	0	0	0	0	0	0	0	0	0	0	0
Solyc00g127660	47.98	47.79	39.96	36	28	26.87	48.09	42.9	31.38	30.04	30.03	22.65	25.98	23.39	31.71	29.8	32.65	29.9	29.71	30
Solyc00g127670	7.34	9.52	4.16	7.07	12.98	15.49	3.22	4.29	8.43	6.79	5.45	7.12	4.11	3.1	6.06	6.6	4.08	5.03	2.86	0.99
Solyc00g127870	92.4	88.54	29.29	26.14	12.31	13.78	20.35	21.32	17.7	18.45	9.3	11.09	4.11	4.68	9.56	10.17	3.37	2.68	2.23	1.77
Solyc00g128870	44.38	43.66	65.33	56.5	21.23	21.88	52.45	55.37	62.45	60.92	26.33	27.28	42.19	36.03	34.97	33.34	32.51	28.06	20.29	19.09
Solyc00g129670	0	0	0	0	0	0	0	0	0	0	0	0	0	0	0	0	0	0	0	0
Solyc00g129680	0	0	0	0	0	0	0	0	0	0	0	0	0	0	0	0	0	0	0	0
Solyc00g129880	0	0	0	0	0	0	0	0	0	0	0	0	0	0	0	0	0	0	0	0
Solyc00g129980	0	0	0	0	0	0	0	0	0	0	0	0	0	0	0	0	0	0	0	0
Solyc00g130180	0	0	0	0	0	0	0	0	0	0	0	0	0	0	0	0	0	0	0	0
Solyc00g130190	0	0	0	0	0	0	0	0	0	0	0	0	0	0	0	0	0	0	0	0
Solyc00g130290	0	0	0	0	0	0	0	0	0	0	0	0	0	0	0	0	0	0	0	0
Solyc00g130690	0	0	0	0	0	0	0	0	0	0	0	0	0	0	0	0	0	0	0	0
Solyc00g130700	0	0	0	0	0	0	0	0	0	0	0	0	0	0	0	0	0	0	0	0
Solyc00g130800	0	0	0	0	0	0	0	0	0	0	0	0	0	0	0	0	0	0	0	0
Solyc00g130810	0	0	0	0	0	0	0	0	0	0	0	0	0	0	0	0	0	0	0	0
Solyc00g131610	0	0	0	0	0	0	0	0	0	0	0	0	0	0	0	0	0	0	0	0
Solyc00g131710	0	0	0	0	0	0	0	0	0	0	0	0	0	0	0	0	0	0	0	0
Solyc00g133110	0	0	0	0	0	0	0	0	0	0	0	0	0	0	0	0	0	0	0	0
Solyc00g133710	0	0	0	0	0	0	0	0	0	0	0	0	0	0	0	0	0	0	0	0
Solyc00g133720	0	0	0	0	0	0	0	0	0	0	0	0	0	0	0	0	0	0	0	0
Solyc00g134620	0	0	0	0	0	0	10.35	6.89	0	0	0	0	0	0	0	0	0	0	0	0
Solyc00g134820	0	0	0	0	0	0	0	0	0	0	0	0	0	0	0	0	0	0	0	0
Solyc00g134830	0	0	0	0	0	0	0	0	0	0	0	0	0	0	0	0	0	0	0	0
Solyc00g134840	0	0	0	0	0	0	0	0	0	0	0	0	0	0	0	0	0	0	0	0
Solyc00g135040	0	0	0	0	0	0	0	0	0	0	0	0	0	0	0	0	0	0	0	0
Solyc00g135050	0	0	0	0	0	0	0	0	0	0	0	0	0	0	0	0	0	0	0	0
Solyc00g135060	0	0	0	0	0	0	0	0	0	0	0	0	0	0	0	0	0	0	0	0
Solyc00g135260	0	0	0	0	0	0	9.88	7.67	0	0	0	0	0	0	0	0	0	0	0	0
Solyc00g136260	8.1	4.89	10.14	9.19	10.59	9.35	3.24	2.74	14.68	11.09	46.76	41.03	65.75	57.29	30.71	32.21	14.65	17.27	2.4	1.73
Solyc00g136560	11.54	11.94	63.05	61.02	14.3	18.59	0.16	0	0	0.57	1.59	0.99	1.54	0.93	1.03	2.05	9.17	8.9	2.75	3.22
Solyc00g138060	0.45	0.31	0	0	0.42	0.09	1.97	2.15	0	0	0	0	0	0	0	0	0	0	0	0
Solyc00g139760	0	0	0	0	0	0	0	0	0	0	0	0	0	0	0	0	0	0	0	0
Solyc00g140060	20.57	19.46	13.63	14.77	32.64	32.89	52.46	42.16	44.89	40.17	51.89	50.04	81.75	84.98	55.6	52.95	39.61	37.91	39.87	42.2
Solyc00g141360	0	0	0	0	0.14	0	1.48	1.19	0.17	0.35	1.68	0.18	0.28	0.14	0.19	0.16	0	0	0	0
Solyc00g141560	0	0	0	0	0	0.21	0	0	0	0	0	0	0	0	0	0	0	0	0.16	0
Solyc00g142160	0	0	0.31	0.32	0.3	0	0.97	0.64	0	0.38	0	2.37	0	0.31	0	0.34	1.17	1.51	2.15	0.74
Solyc00g142170	0	0	0	0.1	0	0	0.59	0.39	0.45	0.11	1.11	0.24	0.37	0.28	0.63	0.62	1.51	2.11	0.8	0.83
Solyc00g143770	10.58	9.7	7.21	10.48	11.58	8.42	17.95	20.55	12.13	12.3	11.73	9.68	9.21	8.42	18.54	24.58	19.79	26.65	20.44	25.28
Solyc00g144470	0	0	0	0	0	0	1.11	1.22	0.38	0.39	0.47	0.48	0	0.05	0	0	0.05	0.05	3.49	2.65
Solyc00g145170	26.46	25.44	0	0.24	0	0	37.97	39.11	4.41	5.87	34.02	27.28	50.67	53.5	7.05	10.62	0	0	0	0
Solyc00g147570	1.68	1.29	0	0.3	0	0	0	0	0	0	0	0	0.1	0	0	0	0	0	0	0
Solyc00g147770	1.44	1.18	1.09	1.3	1.15	0.75	2.08	2.16	0.8	1.32	0.98	0.75	0.75	1	0.89	1.74	0.86	0.65	1.09	0.87
Solyc00g149970	1.89	2.38	3.04	2.78	1.81	2.18	172.67	163.21	2.21	1.84	4.42	4.71	3.5	3.52	2.01	2.95	0.63	0.33	0.39	0.13
Solyc00g153680	0.6	0.73	0.55	0	0.13	0	0	0	0.49	0.17	0.4	0.18	0.41	1.51	0.55	0.91	0.13	0.54	0.11	0.11
Solyc00g153980	0	0	0	0	0.58	0	0	0	0	0	0	0	0	0	0	0	0	0	0	0
Solyc00g154480	0	0	0	0	0.19	0.19	0	0.07	0	0	0	0	0	0	0	0	0	0	0	0
Solyc00g154980	0	0	0	0	0	0	0	0	0	0	0	0	0	0	0	0	0	0	0	0
Solyc00g156980	12.24	14.59	4.57	4.43	9.93	5.58	0.67	0.67	13.39	15.31	17.3	16.56	9.4	8.56	1.38	1.29	0	0	0.3	0
Solyc00g157080	9.32	7.86	15.21	15.46	1.67	2.45	0	0	0	0	0	0	0.19	0.19	0	0	0	0	0	0
Solyc00g157180	0.15	0.46	1.14	0.81	0	0	0.18	0.18	0.21	0	0	0.22	0.17	0.09	0.23	0.19	0.25	0.25	0.07	0.21
Solyc00g160780	10.48	9.16	0.98	1.01	4.41	3.9	1.01	0.41	5.86	7.36	4.58	1.74	1.36	1.17	0.26	1.07	0	0	0	0
Solyc00g163580	0	0.3	0	0	0.67	0.34	0	0	0	0	0	0	0	0	0	0	0	0	0	0
Solyc00g164580	0	0	0	0	0	0	0	0	0	0	0	0	0	0.18	0	0	0	0.18	0.57	0.59
Solyc00g164680	8.92	9.25	25.67	25.66	9.33	8.36	6.05	6.74	6.1	5.94	10.6	8.46	11.7	11.97	9.37	8.91	21.06	18.63	29.79	27.96
Solyc00g165080	0	0	0	0	0	0	0	0	0	0	0	0	0	0	0	0	0	0	0	0
Solyc00g165090	0	0	0	0	0	0	0	0	0	0	0	0	0	0	0	0	0	0	0	0
Solyc00g165190	0	0	0	0	0	0	0	0	0	0	0	0	0	0	0	0	0	0	0	0
Solyc00g166190	0	0	0	0	0	0	0	0	0	0	0	0	0	0	0	0	0	0	0	0
Solyc00g166490	1.06	1.16	0.35	0.09	0.17	0.09	0	0	0	0.11	0	0	0	0	0.12	0.29	0	0	0.34	0.28
Solyc00g166690	0	0	0	0	0	0	0	0	0	0	0	0	0	0	0	0	0	0	0	0.13
Solyc00g167290	0	0	0	0	0	0	0	0	0	0	0	0	0	0	0	0	0	0	0	0
Solyc00g167300	0	0	0	0	0	0	0	0	0	0	0	0	0	0	0	0	0	0	0	0
Solyc00g167800	0	0	0	0	0	0	0	0	0	0	0	0	0	0	0	0	0	0	0	0
Solyc00g168200	6.19	6.33	5.75	2.96	7.01	10	11.88	2.97	12	3.48	14.66	3.65	15.61	12.85	1.91	1.57	1.34	4.17	3.3	1.14
Solyc00g170200	50.9	47.98	36.96	40.69	227.26	222.74	26.95	22.11	3.39	2.19	0.75	1.97	0.51	0.51	0.34	0.28	0	0.5	0	0
Solyc00g170210	11.49	9.03	6.68	7.86	3.26	5.69	12.81	13.53	13.65	15.57	18.06	15.43	16.48	15.63	14.86	10.96	10.91	11.07	13.69	15.17
Solyc00g170510	0	0	0	0	0	0	0	0	0.41	0.41	0	0	0	0	0	0	0	0	0.09	0
Solyc00g171710	57.92	51.2	4.2	4.21	0.11	0	0	0.22	0	0.13	0	0	0	0	0.14	0.12	0	0	0	0
Solyc00g171810	1.01	1.29	2.71	2.87	0.57	0.07	1.21	1.89	1.4	0.97	6.19	3.81	7.01	6.98	2.43	2.89	2.74	1.77	1.85	1.46
Solyc00g172410	0	0	0	0	0	0	0	0	0	0	0	0	0	0	0	0	0	0	0.07	0.07
Solyc00g173430	0	0	0	0	0	0	0	0	0	0	0	0	0	0	0	0	0	0	0	0
Solyc00g174330	12.48	12.38	79.75	78.2	10.04	11.33	18.87	15.3	37.49	35.74	25	19.81	21.2	24.85	102.72	95.92	5.17	5.25	10.67	10.12
Solyc00g174340	67.93	55.48	376.11	383.43	46.16	43.32	80.68	79.51	145.4	133.66	87.61	70.01	84.86	77.58	593.06	579.68	28.36	32.58	58.83	56.37
Solyc00g175240	0	0	0.21	0	0.2	0	0	0	0	0	0	0	0	0	0	0	0	0	0	0
Solyc00g178340	0	0.29	0	0	0	0	5.52	5.02	0	0	0	0	0	0	0	0	0	0.16	0	0
Solyc00g179240	4.66	5.82	2.41	0	31.08	35.83	23.59	39.07	0.72	0	0	0	0	0	0	0	0	0	0	0
Solyc00g179640	6.32	5.26	8.27	6.15	12.09	10.04	32.73	30.31	23	13.32	18.06	22.14	98.37	99.43	12.17	14.07	15.44	14.66	13.71	16.07
Solyc00g179840	0	0	0	0	0	0	0	0	0	0	0	0	0	0	0	0	0	0	0	0
Solyc00g180440	0	0	0	0.4	0	0	0	0	0	0	0.57	0	0	0	0	0	0	0	0	0
Solyc00g180840	1.22	1.37	0	0.15	0	0	0.29	0.44	0.17	0.17	0	0.36	0.42	0.28	0.19	0.46	0.13	0.14	0.11	0.11
Solyc00g181240	0	0	0	0	0	0	0	0	0	0	0.8	0	0	0	0	0	0	0	0	0.44
Solyc00g181250	0	0	0	0	0	0	0	0	0	0	0	0.16	0	0	0	0	0.12	0	0.1	0
Solyc00g183050	0.71	1.46	0.83	1.7	0.81	0	0.85	0	0	2	0	3.15	4.08	2.46	5.48	0.9	3.86	2.4	1.27	2.63
Solyc00g183550	0	0	0	0	0	0	0	0	0	0	0	0	0	0	0	0	0	0	0	0
Solyc00g184350	5.54	5.04	9.07	7.37	5.58	6.63	15.02	17.71	9.1	9.22	10.77	8.77	11.3	9	12.96	13.04	17.59	17.06	13.69	16.12
Solyc00g185750	0	0	0	0	0	0	0	0	0	0	0	0	0	0	0	0	0	0	0	0
Solyc00g185850	0	0	0	0	0	0	0	0	0	0	0	0	0	0	0	0	0	0	0	0
Solyc00g186050	0	0	0	0	0	0.18	0.57	0.57	0.22	0.22	0	0.47	0	0.18	0.24	0	0.17	0	0	0
Solyc00g187050	1710.02	1654.5	11.06	11.61	6.81	5.36	1.36	1.48	57.01	53.01	106.92	89.49	23.79	22.07	1.53	2.35	0.57	0.48	0	0
Solyc00g188250	0.21	0.65	0.74	1.01	0	0	0.76	0.51	0	0	0.36	0.62	0	0.24	0.32	0.8	0.91	0.24	0.19	0.19
Solyc00g188750	0	0	0	0	0	0	0	0	0	0	0	0	0	0	0	0	0	0	0	0
Solyc00g188850	0.37	0.13	0.29	0	0	0	0	0	0	0	0	0	0	0	0	0	0	0	0	0
Solyc00g192150	0	0.05	0	0	0	0	0	0	0	0	0	0	0	0	0	0	0	0	0	0
Solyc00g195350	0	0	0	0	0	0	0	0	0	0	0	0.4	0	0	0	0	0	0	0	0
Solyc00g195360	0	0	0	0	0	0	0.13	0.38	0	0	0.18	0	0	0	0	0	0	0	0.67	1.09
Solyc00g196060	35.12	31.61	61.21	63.68	17.64	16.54	41.36	37.91	68.21	58.12	72.26	67.54	58.88	54.46	65.63	65.63	52.62	53.11	45.07	45.36
Solyc00g196460	0	0	0	0	0	0	0	0	0	0	0	0	0	0	0	0	0	0	0	0
Solyc00g198360	0	0	0	0	0	0	0	0	0	0	0	0	0	0	0	0	0	0	0	0
Solyc00g199960	0	0	0	0	0	0	0	0	0	0	0	0	0	0	0	0	0	0	0	0
Solyc00g201060	0	0	0	0	0	0	0	0	0	0	0	0	0	1.29	0	0	0	0	0	0
Solyc00g201160	0.31	0.4	0.45	0.74	2.2	1.88	3.16	3.81	0	0.33	0.39	0.34	0	0.45	1.79	1.18	0.34	0.35	0.07	0.07
Solyc00g201460	0	0.13	0	0	0.14	0	0	0	0	0	0	0	0.14	0	0	0	0	0	0	0
Solyc00g201760	0	0	0	0	0	0	0	0	0	0	0	0	0	0	0	0	0	0	0	0
Solyc00g202560	0	0	0	0	0	0	0	0	0	0	0	0	0	0	0	0	0	0	0	0
Solyc00g203660	0.14	0.3	0	0.17	0.98	0.33	0	0	0	0	0.24	0.21	0.33	0.33	0	0	0	0	0.9	0.53
Solyc00g206460	25.24	22.88	39.52	42.39	63.12	65.31	33.62	32.25	66.74	65.79	18.37	17.79	6.98	6.52	105.73	103.73	21.02	22.4	126.02	122.37
Solyc00g207960	0	0	0	0	0	0	0.23	0	0	0	0	7.32	0	1.32	1.76	1.94	0	0	0	0
Solyc00g209460	0.77	1.05	0.3	0.31	0	0.59	0	0	0.36	1.44	0.87	0.38	1.47	0.89	2.37	0.33	1.39	0.86	0.46	0.24
Solyc00g209560	0	0	0	0	0	0	0.13	0	0	0	0	0	0	0	0	0	0	0	0	0
Solyc00g210860	0	0	0	0	0	0	0	0	0	0	0	1.93	0	0	0	0	0	0	0	0
Solyc00g212260	0.16	0.16	0.37	0.19	0.9	1.1	0.9	1	0.05	0	0.2	0.06	0.14	0.09	0.12	0.15	0.22	0.27	0	0
Solyc00g213960	0	0	0	0	0	0	0	0	0	0	0	0	0	0	0	0	0	0	0	0
Solyc00g215560	0	1.47	0.33	0.69	1.3	0.66	0.69	1.72	0	0	0	0	0.33	1	1.33	1.46	0.31	0.32	2.3	0.53
Solyc00g217560	0.16	0.66	0.38	0.39	0.37	1.31	0.39	1.55	0	0	0	0	0	0	0	0	0	0	0	0
Solyc00g217960	19.22	19.47	12.29	14.03	14.6	14.87	15.46	9.22	7.46	7.83	11.39	5.67	24.92	19.3	36.72	35.93	61.95	58.98	25.13	26.47
Solyc00g218560	0	0	0	0	0	0	0	0	0	0	0	0	0	0	0	0	0	0	0	0
Solyc00g220360	0	0	0	0	0	0	0	0	0	0	0	0	0	0	0	0	0	0	0	0
Solyc00g222060	0	0	0	0	0	0	0	0	0	0	0	0	0	0	0	0	0	0	0	0
Solyc00g222460	0	0	0	0	0	0	0.36	0.72	0.42	0	0	0	0	0	0	0	0	0	0.27	0
Solyc00g226760	0	0	0	0	0	0	0	0	0.12	0	0	0.13	0.2	0.1	0	0	0	0	0	0
Solyc00g227860	18.24	16.93	23.81	24.58	40.74	38.15	16.75	12.82	14.15	15.02	8.49	7.75	4.64	4.04	11.26	11.06	3.34	4.07	0.59	0.84
Solyc00g227960	0	0	0	0	0	0	0	0	0.13	0	0	0.14	0.21	0.11	0	0	0	0	0	0
Solyc00g228260	0.55	1.12	0	0	0	0	0	0	0	0	0	0	0	0	0	0	0	0	0	0
Solyc00g229260	0.15	0	0	0	0	0	0	0	0	0	0	0	0	0	0	0	0	0	0	0
Solyc00g230060	0.97	0.4	0.9	1.86	0.33	1.01	0	0	0.94	0.14	1.32	0.29	1.67	1.12	0.3	0.25	0.21	0.22	0.09	0.09
Solyc00g230070	15.84	14.55	21.8	22.83	32.98	35.09	0	0.78	12.55	9.54	31.2	37.19	31.15	36.57	9.96	4.11	3.16	3.63	3.74	2.69
Solyc00g230080	9.09	10.76	18.63	18.88	36.86	35.05	1.15	0	8.95	8.06	21.05	26.09	37.3	33.11	4.05	4.86	2.33	1.61	1.06	0.66
Solyc00g230280	0	0	0	0	0	0	0	0	0	0	0	0	0	0	0	0	0	0	0	0
Solyc00g231680	0	0	0	0.09	0	0	0	0	0	0	0.12	0	0	0	0	0	0	0	0	0
Solyc00g231780	2.37	2.43	0.61	0.32	0.9	1.52	1.26	0.63	0	0.74	1.78	0.78	1.51	1.22	1.22	0.67	0.57	0.89	1.64	1.7
Solyc00g233480	0.46	0	0.9	0.19	1.4	2.68	45.47	45.78	0.64	0.65	2.09	1.82	0.53	0.54	3.81	2.36	0	0.52	0	0
Solyc00g237680	0	0	0	0	0	0	0	0	0	0	0	0	0	0	0	0	0	0	0	0
Solyc00g240580	0	0	0	0	0.63	0	0	0.67	0	0	0	0	0	0.64	0	0	0	0	0.5	0.52
Solyc00g244280	0	0	0	0	0	0	0	0	0	0	0	1.38	0	0.54	0	0	0	0	0	0
Solyc00g244290	1.91	2.66	2.42	3.32	1.97	2.4	3.96	4.99	3.61	4.14	4.11	3.33	5.97	6.21	5.34	3.75	9.6	9.55	9.87	8.5
Solyc00g244300	2.32	2.03	3.46	4.35	1.87	0	13.1	11.1	4.13	1.39	10.08	8.78	19.73	16.8	11.72	16.82	16.15	18.22	8.24	8.87
Solyc00g245200	0	0.47	0.53	1.1	1.56	2.12	0	0	0	0.64	2.33	1.35	2.63	3.71	0.71	0	0	0	0.41	0.42
Solyc00g246800	0	0	0	0	0	0	0	0	0	0	0	0	0	0	0	0	0	0	0	0
Solyc00g247300	0.2	0	10.06	11.42	0.22	0.17	32.35	33.55	0.41	0.49	2.76	1.82	2.27	2.45	26.21	27.98	0.59	0.67	0.04	0.09
Solyc00g249200	0	0	0.15	0	0	0	0	0	0	0	0	0	0	0	0	0	0	0	0	0
Solyc00g249900	15.63	12.61	13.6	15.77	10.72	10.55	18.12	15.54	24.31	22.7	19.98	18.34	35	31.16	25.71	33.11	23.88	19.71	9.17	8.15
Solyc00g249910	15.22	11.17	13.46	13.46	9	7.64	25.41	19.03	23.38	25.56	15.68	11.71	8.73	9.55	17.33	18.09	11.13	13.39	7.94	6.12
Solyc00g254110	0	0	0	0	0	0	0	0	0	0	0	0	0	0	0	0	0	0	0	0
Solyc00g254910	4.45	5	9.85	9.49	23.14	24.2	28.81	30.2	0.45	0.31	0	0	0.37	0.75	2.17	3.31	5.42	5.49	0.48	0.3
Solyc00g255510	0	0.06	0	0	0	0	0	0	0	0	0	0	0	0	0	0	0	0	0	0
Solyc00g256710	29.82	30.16	12.75	15.18	30.7	26.91	51.84	47.25	27.08	25.04	29.6	34.88	27.53	21.76	42.77	40.53	32.73	31.98	22.86	25.03
Solyc00g257110	1194.82	1174.41	1235.02	1233.33	0.1	0.3	2.35	3.34	1.27	0.98	0.22	0.45	4.04	4.72	2.01	2.66	0.33	0.73	0.08	0.08
Solyc00g263210	0	0	0	0	0	0	0	0	0	0	0	0	0	0	0	0	0	0	0	0
Solyc00g265110	7.27	5.82	3.68	0.76	1.79	1.46	0.38	0	6.57	1.33	6.42	6.06	3.26	2.92	3.41	0.8	2.4	1.42	0.84	0.88
Solyc00g265510	0	0	0	0	0	1.97	0	0.68	0	0	0	0	0	0.66	0	0	0	0	0	0
Solyc00g266110	0	0	0	0	0	0	0	0	0	0	0	0	0	0	0	0	0	0	0	0
Solyc00g268310	0	0	0	0	0	0	0	0	0	0	0	0	0	0	0	0	0	0	0	0
Solyc00g269810	0	0	0	0	0	0	0	0	0	0	0	0	0	0	0	0	0	0	0	0
Solyc00g270510	0	0	0	0	0	0	0	0	0	0	0	0	0	0	0	0	0	0	0	0
Solyc00g272810	4.35	4.33	6.97	5.49	149.66	155.95	9.31	9.16	5.05	7.27	3.18	2.95	1.08	0.68	0.72	0.6	0.77	0.79	0.52	0.33
Solyc00g273110	4.06	5.08	2.1	0.54	3.07	4.17	3.25	2.71	0.63	3.17	5.35	7.99	3.11	4.69	11.13	4.02	0.98	3.05	3.21	4.59
Solyc00g275310	0	0	0	0	0	0	0	0	0	0	0	0	0	0	0	0	0	0	0	0
Solyc00g277510	15.29	14.34	21.73	23.37	21.66	20.59	0.51	0.51	20.01	22.07	67.58	69.5	76.48	80.38	5.23	6.48	1.38	2.86	20.39	21.19
Solyc00g278110	2.36	2.95	2.28	2.35	14.39	12.24	0.16	0.16	0.18	0	0	0	0	0	0	0.17	0	0	0	0.24
Solyc00g280110	7.97	6.99	3.97	5.45	0	2.63	0	0	0	0	0	0	0	0	0	0	0	0	0	0
Solyc00g281110	0	0	0	0	0	0	0	0	0	0	0	0	0	0	0	0	0	0	0	0
Solyc00g282510	4.37	4.33	3.52	3.97	1.53	1.11	30.8	31.86	6.46	3.98	6.1	3.05	9.1	7.71	6.96	8.19	4.07	4.21	3.08	2.75
Solyc00g283010	0.13	0.14	0	0	0	0.05	1.85	0.9	0	0.06	0	0	0	0	0	0	0	0	0	0
Solyc00g283110	0	0	0	0	0	0	0	0	0	0	0	0	0	0	0	0	0	0	0	0
Solyc00g284510	0	0	0	0.13	0	0	0	0	0	0	0	0	0	0	0	0	0	0	0	0
Solyc00g286010	0	0	0	0	0	0	0	0	0	0	0	0	0	0	0	0	0	0	0	0
Solyc00g286020	0	0	0	0	0	0	0	0	0	0	0	0	0	0	0	0	0	0	0	0
Solyc00g286030	0	0	0	0	0	0	0	0	0	0	0	0	0	0	0	0	0	0	0	0
Solyc00g287330	0	0	0	0	0	0	0	0	0	0	0	0	0	0	0	0	0	0	0	0
Solyc00g289230	1.39	1.5	6.83	6.83	6.65	7.06	6.36	6.45	0.11	0.11	0.14	0.12	0.09	0	0.25	0.41	0.18	0.37	0	0.15
Solyc00g294230	0.28	0.15	0.17	0	0.16	0.33	0	0	0.99	0.8	0.48	0.63	0.16	0	0.22	0.18	0.15	0	0	0
Solyc00g294630	0	0	0	0	0	0	0	0	0	0	0	0	0	0	0	0	0	0	0	0
Solyc00g297330	0	0	0	0	0	0	0	0	0	0	0	0	0	0	0	0	0	0	0	0
Solyc00g300430	0	0	0	0	0	0	0	0	0	0	0	0	0	0	0	0	0	0	0	0
Solyc00g300730	0	0	0	0	0	0	0	0	0	0	0	0	0	0	0	0	0	0	0	0
Solyc00g303630	0	0	0	0	0	0	0	0	0	0	0	0	0	0	0	0	0	0	0	0
Solyc00g304030	0	0	0	0	0	0	0	0	0	0	0	0	0	0	0	0	0	0	0	0
Solyc00g304630	0	0	0	0	0	0	0	0	0	0	0	0	0	0	0	0	0	0	0	0
Solyc00g306730	0	0	0	0	0	0	0	0	0	0	0	0	0	0	0	0	0	0	0	0
Solyc00g306830	0	0	0	0	0	0	0	0	0	0	0	0	0	0	0	0	0	0	0	0
Solyc00g308530	0	0	0	0	0	0	0	0	0	0	0	0	0	0	0	0	0	0	0	0
Solyc00g308930	0	0	0	0	0	0	0	0	0	0	0	0	0	0	0	0	0	0	0	0
Solyc00g309530	0	0.55	0	0	0	0	0	0	0.74	0	0	0	0	0	0	0	0	0	0	0.5
Solyc00g311230	0.66	0.41	0.62	0.16	1.35	0.77	0.32	0.32	1.1	0.93	0.9	0.59	0.3	0.76	0.82	1.01	0.29	0.15	0	0
Solyc00g313030	0	0	0	0	0	0	0	0	0	0	0	0	0	0	0	0	0	0	0	0
Solyc00g313530	0	0	0	0	0	0	0	0	0	0	0	0	0	0	0	0	0	0	0	0
Solyc00g313930	0	0	0	0	0	0	0	0	0	0	0	0	0	0.66	0	0	0	0	0	0
Solyc00g316030	0.1	0.1	0	0	0	0	0	0	0	0	0	0	0	0	0	0	0	0	0	0
Solyc00g316530	0.36	0	0.84	0.43	0	0.83	0	0	0	2.02	0	0	0.41	0.42	0	0	0	0	0	0
Solyc00g316730	0	0.12	0	0	0	0	0	0	0	0	0	0	0	0	0	0	0	0	0	0
Solyc00g318030	0	0	0	0	0	0	0	0	0	0	0	0	0	0	0	0	0	0	0	0
Solyc00g318130	0	0	0	0	0	0	0	0	0.14	0.42	0.17	0	0.23	0	0	0	0	0	0	0
Solyc00g318830	0.15	1.1	1.25	0.55	0	0	0	0	0	0.43	0.26	0.45	0	0	0	0.39	0.17	0	0.27	0.57
Solyc00g320430	0	0	0	0	0	0	0	0	0	0	0	1.4	0	0	0	0	0	0	0	0
Solyc00g322630	0	0	0	0	0	0	0	0	0	0	0.49	0	0	0	0	0	0	0	0	0
Solyc00g322830	0	0	0	0	0	0	0	0	0	0	0	0	0	0	0	0	0	0	0	0
Solyc00g323130	3.26	2.26	0.67	0.57	33.19	32.37	389.29	378.87	0	0	0	0	0	0	0	0	0.1	0	0	0
Solyc00g324530	0	0.21	0	0	0	0	0	0	0	0	0	0	0	0	0	0	0	0	0	0
Solyc01g005000	29.78	29.55	22.08	23.62	17.98	17.68	9.96	9.65	22.32	20.81	37.62	32.55	33.53	34.31	14.32	15.17	1.35	1.96	1.02	1.24
Solyc01g005010	4.74	4.21	4.52	5.12	7.31	7.18	7.65	6.24	6.36	7.54	7.11	5.39	4.19	4.93	3.11	2.27	1.27	1.22	0.14	0
Solyc01g005020	12.96	12.5	16.18	15.12	11.36	11.12	33.36	30.76	21.76	20.68	32.44	27.8	36	33.38	34.04	34.23	25.32	23.71	16.9	17.34
Solyc01g005030	8.36	8.45	7.44	7.6	7.91	7.22	14.57	12.11	8.9	7.83	9.89	8.97	14.98	15.21	27.25	25.6	38.54	38.53	22.47	23.89
Solyc01g005040	0	0	0	0.3	1.56	0.87	0	0.15	0.17	0	0	0	0.43	0.14	0	0	0	0	0	0
Solyc01g005050	71.45	73.71	37.82	44.99	0	0	0.29	0	0	0	0	0.36	0.14	0.14	0	0	0	0	0	0
Solyc01g005060	3.22	3.5	4.59	2.91	1.79	1.59	1.26	2.68	20.51	21.06	9.24	7.85	4.07	3.42	5.47	5.02	2.43	2.66	2.34	1.15
Solyc01g005070	4.31	3.38	15.28	16.73	0.06	0	0.07	0.13	1.24	0.86	0.19	0.49	0.13	0	0	0.07	0	0.06	0	0
Solyc01g005080	26.76	24.06	61.21	62.2	13.75	14.81	29.7	32.91	23.12	20.55	16.68	14.01	9.7	8.64	26.45	23.89	12.83	13.98	6.35	7.69
Solyc01g005090	0	0	0	0	0	0	20.9	20.34	0.1	0	0	0	0	0	0	0	0	0	0	0
Solyc01g005100	10.31	9.58	12.3	9.43	18.48	21.47	18.68	16.23	12.42	13.25	11.98	11.22	12.21	9.56	13.59	14.99	7.6	7.42	8.57	9.59
Solyc01g005110	43.42	42.45	29.53	25.09	11.55	11.42	25.7	23.9	20.67	19.09	10	8.93	13.04	11.42	15.92	12.39	20.67	18.42	20.36	23.47
Solyc01g005120	28.91	29.28	153.28	155.9	4.59	4.28	48.04	45.31	10.59	10.89	11.1	11.35	3.99	2.96	11.77	13.19	5.07	4.42	4.72	4.16
Solyc01g005130	7.83	6.9	10.17	10.56	31.05	29.9	41.38	42.02	10.5	9.24	10.43	8.96	29.61	30.85	18.22	18.53	12.2	14.88	25.1	24.09
Solyc01g005140	0.08	0.16	2.08	0.93	0.09	0	7.74	6.24	0	0	0	0	0.09	0	5.51	4.65	12.23	10.92	16.18	16.24
Solyc01g005150	1.19	1.32	0.5	0.13	0.86	2.12	4.66	4.65	0.3	0.76	0.18	0.48	0.37	0.12	0.5	0.41	0	0.12	0	0
Solyc01g005160	0.05	0.05	0	0.12	0	0.06	0.36	0.3	0.35	0.21	0.34	0.29	0.06	0	1.85	1.78	0.43	0.39	0.58	0.69
Solyc01g005170	0.21	0.14	0	0	0.16	0.24	0.33	0.41	0.19	0.1	0.81	0.61	0.71	0.32	0.84	0.7	0.97	1	1.52	2.03
Solyc01g005180	0	0	0	0	0	0	0	0	0	0	0	0	0	0	0	0	0	0	0	0
Solyc01g005190	0.1	0	0.23	0.24	0.11	0.11	0.36	0.24	0.14	0.14	0.33	0.29	0.23	0.23	0.46	0	0	0.22	0.61	0.27
Solyc01g005200	0	0	0	0.11	0	0	0	0	0	0.13	0.16	0.42	0	0.11	0.15	0	0.21	0.22	0.09	0
Solyc01g005210	10.31	9.99	18.89	17.64	20.96	20.41	49.67	46.81	14.53	15.25	29.69	22.97	50.71	48.59	25.11	26.43	50.4	47.61	28.22	27.84
Solyc01g005220	1.76	2.22	6.48	6.67	2.67	2.89	4.85	4.98	1.35	1	4.24	3.42	4.68	5.14	19.65	16.5	13.31	13.7	12.07	12.13
Solyc01g005230	1.04	1.87	0.68	0.55	0.81	0.68	6.65	5.94	0.09	0	0.22	0	0.07	0.15	0.5	0.17	0	0.07	0	0
Solyc01g005240	19.2	15.99	20.27	19.07	17.41	16.71	25.76	26.28	31.18	26.92	46.35	37.76	33.69	31.64	39.87	39.25	32.83	32.54	18.2	17.78
Solyc01g005250	23.43	22.35	25.14	25.38	24.44	24.01	34.24	33.5	82.16	81.81	104.84	90.01	112.7	107.24	69.49	72.4	65.79	65.71	112.43	123.55
Solyc01g005260	4.31	4.25	1.88	1.56	4.62	4.88	6.65	5.62	4.26	4.32	5.21	3.97	4.23	6.3	4.26	3.72	4.67	3.37	1.23	1.21
Solyc01g005270	4.47	4.2	5.61	5.52	11.84	9.15	14.61	15.71	3.39	3.64	1.34	1.38	2.07	1.66	2.55	3.3	6.33	7.37	5	3.86
Solyc01g005280	6.17	6.91	4.18	4.48	9.82	7.71	1.15	0.62	3.76	2.58	5.09	4	3.45	2.88	2.49	3.17	9.24	9.82	2.74	1.9
Solyc01g005290	4.97	6.59	3.19	2.91	14.13	12.2	2.03	1.39	1.9	1.78	2.68	1.87	2.42	2.93	3.58	2.95	19.6	17.21	49.23	43.35
Solyc01g005300	1.96	2.8	9.15	9.98	84.78	87.55	63.59	62.57	33.43	35.29	30.46	27.81	109.78	103.98	69.76	74.15	79.32	76.49	56.35	58.56
Solyc01g005310	18.9	16.91	0.23	0.24	0	0	0.14	0	0	0.06	0	0	0	0	0.06	0	0	0	0	0
Solyc01g005320	0.15	0	0	0	0.17	0	27.01	24.27	0.2	0.1	0.12	0.11	0.08	0.08	0.22	0.09	0.08	0	0	0
Solyc01g005330	30.72	28.49	19.95	19.29	38.1	36.31	43.03	41.53	53.84	51.11	36.72	32.82	30.19	31.68	36.7	39.48	18.47	18.31	13.6	13.52
Solyc01g005340	5.05	5.12	7.94	7.97	4.47	5.19	13.95	12.55	6.88	6.55	9.05	8.07	12.94	11.06	15.74	16.66	15.05	14.44	13.01	13.44
Solyc01g005350	4.19	4.29	3.61	2.79	1.41	2.33	0.65	0.74	0.43	0.11	0.13	0.11	0.09	0	0	0.1	0	0	0	0
Solyc01g005360	24.9	26.48	0.57	0.2	0.09	0.09	0.1	0.1	0	0	0	0	0	0	0	0	0	0	0	0
Solyc01g005370	8.93	10.93	6.32	7.05	2.3	1.38	5.42	3.75	5.49	5.56	4.05	4.62	9.08	7.44	11.06	11.36	25.08	23.7	12.12	13.28
Solyc01g005380	3.1	3.55	4.64	4.38	6.23	6.34	5.47	5.46	8.91	8.38	12	10.04	9.53	9.43	8.46	9.73	6.88	8.76	13.53	12.54
Solyc01g005390	2.06	2.11	1.27	3.19	0.55	0.14	13.39	13.66	0.34	0.34	0.82	0.36	0.42	0.28	1.31	2	1.18	1.5	1.51	1.68
Solyc01g005400	10.35	11.11	2.94	4.53	12.21	10.88	4.04	4.14	1.87	1.77	0.86	0.62	0.77	0.58	0.13	0.21	0.18	0.19	0.82	0.54
Solyc01g005410	5.99	3.72	7.99	6.93	16.03	13.72	12.5	11.42	7.76	6.76	10.64	8.4	6.31	5.21	11.35	12.49	0.75	0.77	0.09	0
Solyc01g005420	5.47	3.91	1.44	1.98	20.82	20.14	1.73	1.98	0.72	1.31	1.22	1.07	0.36	0.24	2.23	1.71	0.34	0.12	0	0
Solyc01g005430	13.29	12.69	12.18	11.6	7.21	6.14	11.7	9.81	6.57	6.44	7.41	6.38	8.07	6.44	7.06	8.94	7.58	8.26	10.06	10.6
Solyc01g005440	307.1	308.78	107.12	106.89	98.14	94.5	85.49	81.18	323.32	308.99	255.42	223.39	349.39	337.65	90.3	85.14	37.31	32.22	32.66	34.64
Solyc01g005450	2.54	2.37	1.39	1.34	3.9	3.89	0	0	5.18	4.1	4.69	4.74	4.46	5.18	2.3	3.14	1.62	1.51	0.8	0.48
Solyc01g005460	12.53	15.33	4.9	3.5	3.58	2.84	6.75	7.86	14.93	14.97	4.76	4.49	3.76	3.38	0.36	0.74	0.13	0.13	0	0
Solyc01g005470	13.88	13.27	8.34	10.76	38.96	36.53	14.89	15.42	8.52	8.95	7.71	5.87	2.74	3.81	52.42	47.17	27.41	25.2	1.62	2.1
Solyc01g005480	3.64	3.21	2.59	2.96	3.09	2.45	7.1	6.91	5.25	4.26	7.87	7.15	8.17	8.46	7.63	6.55	4.44	3.63	3.95	4.86
Solyc01g005490	22.29	25.05	24.03	24.58	23	24.15	26.76	26.57	18.4	16.63	16.54	13.76	14.15	12.07	21.61	23.73	28.74	28.43	17.15	15.97
Solyc01g005500	0.18	0.54	0.1	0.11	1.2	2.45	1.7	1.69	0	0.12	0	0	0.1	0	1.36	2.47	0.1	0	0.08	0.16
Solyc01g005510	736.49	713.92	1177.54	1158.57	0.36	0.14	2.13	2.69	1.47	1.27	0.2	0.17	3.3	4.13	1.94	1.95	0.47	0.44	0	0.07
Solyc01g005520	36.36	44.19	74.78	75	213.44	206.63	1.64	1.64	25.65	30.21	28.57	26.61	11.96	17.07	18.97	19.05	13.72	13.25	20.45	19.33
Solyc01g005530	12.14	7.48	8.19	10.62	10.95	11.15	16.14	14.55	7.05	7.7	10.83	7.12	4.79	5.72	7.24	6.97	4.82	5.87	3.95	4.7
Solyc01g005540	7.31	7.1	8.02	7.23	19.55	18.45	6.31	6.7	14.63	14.08	11.75	11.81	10.37	9.67	6.9	6.95	4.95	4.34	12.27	10.21
Solyc01g005550	52.61	54.09	60.87	59.89	57.62	61.69	73.75	70.26	87.26	84.12	62.35	51.1	41.2	36.94	32.22	31.18	15.9	15.05	11.83	10.69
Solyc01g005560	162.54	154.57	184.69	180.92	263.63	262.48	507.87	484.18	69.57	67.89	94.64	84.88	74.36	73.64	123.37	120.68	272.31	262.9	105.93	106.9
Solyc01g005570	42.93	41.98	30.16	30.58	42.24	34.59	38.38	33.35	38.56	33.96	27.5	25.25	20.65	18.02	20.94	22.25	23.09	23.06	11.76	10.82
Solyc01g005580	24.98	23.48	25.25	28.59	27.16	25.91	37.97	34.02	27.39	28.17	28.31	25.62	21.59	22.89	21.64	21.35	37.47	37.59	21.89	23.42
Solyc01g005590	40.23	44.7	127.27	116.31	32.17	31.83	56.13	43.32	25.75	26.11	23.16	27.1	14.52	15.08	40.89	47.77	4.87	4.59	2	1.7
Solyc01g005600	22.73	22.28	47.69	41.98	24.42	23.64	44.53	45.11	17.77	21.6	29.65	26.26	33.09	34.39	37.58	36.9	44.18	42.69	48.83	48.44
Solyc01g005610	0.44	0.15	0.69	0.62	0	0	0	0	0	0	0	0.11	0.08	0	0	0	0	0	0	0
Solyc01g005620	191.01	183.92	144.55	143.29	231.39	234.31	236.1	223.95	300.42	295.76	273.08	240.16	266.12	246.87	188.28	179.41	180.22	175.26	134.92	138.13
Solyc01g005630	0.12	0.25	0	0	0	0.14	15.55	10.01	0	0	0	0	0	0	0	0	0	0	0	0
Solyc01g005640	14.43	14.65	13.4	15.79	9.03	8.14	17.32	17.43	12.69	13.32	14.68	14.05	14.76	13.8	15.68	14.86	19.87	19.37	21.89	22.6
Solyc01g005650	0.11	0.22	0	0	0	0	0	0	0	0	0	0	0	0	0	0	0	0	0	0
Solyc01g005660	0.09	0.09	0.64	0.66	0	0	0	0	0.13	0	0	0	0.11	0.11	0	0	0.1	0	0	0
Solyc01g005670	2.28	2.5	2.78	3.12	2.59	2.7	4.83	4.3	2.94	2.45	3.59	2.89	3.99	3.64	4.36	5.33	3.07	3.42	2.03	2.87
Solyc01g005680	0.98	0.73	0.21	0.21	4.83	7.58	10.01	9.47	0	0.25	0.15	0	0.1	0	0	0	0	0	0	0
Solyc01g005690	14.47	13.01	11.6	13.65	14.56	13.82	34.42	30.04	29.12	24.35	37.05	37.42	30.68	26.19	34.96	38.05	27.94	27.12	19.96	20.11
Solyc01g005700	4.2	4.3	5.47	4.9	3.53	3.36	5.41	4.51	5.4	6.14	6.48	5.84	5.94	5.98	5.43	6.89	3.6	4.8	4.25	4.23
Solyc01g005710	1.84	1.59	0.16	0.17	0.64	0.33	0	0	0	0	0	0	0.16	0.16	1.09	0.18	0.15	0.16	0.25	0
Solyc01g005720	2.29	2.9	1.58	1.3	1.05	1.52	0.74	0.6	0.05	0.11	0.13	0.17	0.18	0.18	2.69	2.71	0.84	1.26	1.66	1.43
Solyc01g005730	3.71	3.15	3.36	2.93	3.53	4.36	1.02	0.49	0	0	0	0.05	0.14	0.07	1.11	1.28	0.38	0.32	0.92	0.9
Solyc01g005740	1.85	1.13	0	0	0.42	0	0	0.89	0.51	0	0	0	0	0	0	0	0.8	1.66	1.97	1.37
Solyc01g005750	33.96	35.99	11.03	15.74	61.38	57.57	0	0	1.27	1.29	0.52	1.35	0.35	0	0	0	0	0	0	0
Solyc01g005760	4.53	4.32	6.42	8.05	3.59	3.94	5.76	4.56	0.21	0.17	1.23	0.76	1.25	1.32	14.6	16.42	8.48	7.87	14.63	13.81
Solyc01g005770	1.52	1.04	2.36	1.52	0.29	0.29	0.91	0.91	1.76	1.07	0.86	1.5	4.95	2.93	0	0.97	0	0.57	0.9	0.7
Solyc01g005780	0.92	0.76	0.22	0.18	0.29	0.56	0.27	0.31	0.1	0.05	0.13	0.33	0.47	0.17	0.11	0.24	0.16	0.12	0.16	0.07
Solyc01g005790	3.1	3.23	2.52	3.56	3.09	3.58	3.05	2.45	2.83	2.79	2.62	3.47	4.62	3.72	3.25	3.55	3.03	2.02	3.09	2.46
Solyc01g005800	1.27	0.98	0.04	0.18	0.26	0.13	2.63	2.08	0.32	0.38	0.59	0.28	0.31	0.13	1.54	1.47	1.13	0.95	0.45	0.57
Solyc01g005810	25.65	23.82	20.99	20.26	13.76	17.11	28.47	27.54	37.19	39.62	33.94	31.67	56.28	51.16	34.14	37.12	37.7	33.1	26.24	23.42
Solyc01g005820	131.83	129.33	150.05	151.18	83.39	78.43	155.07	145.33	169.38	163.59	112.48	97.85	186.35	177.45	139.23	134.58	105.41	106.05	97.67	90.96
Solyc01g005830	17.24	18.85	11.25	10.24	15.29	16.94	22.59	22.25	44.87	39.76	29.19	28.43	19.17	17.7	13.28	13.39	5.28	5.03	0.53	0.73
Solyc01g005840	19.72	21.44	22.45	23.48	35.28	34.39	17.14	16.62	24.2	19.19	15.48	12.72	25.33	26.2	14.56	15.15	23.52	21.82	16.81	16.71
Solyc01g005850	0.19	0.2	0.56	0.34	0.54	0.11	27.6	24.92	0.53	0.27	0.49	0.42	0.66	0.88	0.74	0.37	0.31	0.22	0.6	0.8
Solyc01g005860	0	0	0	0	0	0.29	0	1.21	0	0.35	0	0.37	0	1.17	0	0	0	0	0	0
Solyc01g005870	7.43	7.52	2.16	2.56	2.99	3.09	0.47	0.09	0.05	0.05	0.12	0.11	0.16	0.25	1.54	1.63	0.46	0.8	0.98	0.99
Solyc01g005880	0.25	0.59	0.1	0	0	0	5.79	7.25	0	0	0	0	0	0	0	0	0	0	0	0
Solyc01g005890	0	0	0	0	0	0	0.52	0.65	0	0	0	0	0	0	0	0	0	0	0	0
Solyc01g005900	18.6	17.26	16.31	16.29	13.36	13.84	19.76	19.24	12.96	14.7	15.48	11.54	12.01	9.62	8.61	8.66	6.51	6.74	7.68	7.23
Solyc01g005910	14.55	15.53	12.68	13.05	26.32	24.01	6.05	5.66	12.11	9.5	10.04	8.37	10.03	7.58	8.94	7.95	12.74	12.33	8.45	9.37
Solyc01g005920	1.14	1.12	0.98	1.19	2.31	2.12	5.48	5.77	0.96	1.95	1.35	1.03	1.48	0.97	0.61	0.51	0.43	0.39	0.18	0.14
Solyc01g005930	5.62	6.63	15.44	15.59	16.31	15.9	1.26	1.33	4.88	3.73	5.33	6.28	7.79	7.27	10.85	9.11	17.29	16.24	16.53	14.96
Solyc01g005940	0	0	0	0	0	0	0.17	0.43	0	0	0	0	0	0	0	0	0	0	0	0
Solyc01g005950	41.65	38.17	31.16	33.63	28.62	24.54	39.7	41.16	39.51	39.01	38.59	36.14	33.1	32.31	34.15	37.92	40.11	37.88	23.22	24.55
Solyc01g005960	34.03	33.67	34.2	35.24	19.46	19.12	26.34	30.02	25.93	24.83	21.2	18.06	15.91	16.24	16.07	16.73	19.39	19.18	21.97	22.05
Solyc01g005970	5.56	4.57	2.6	2.73	2.82	3.73	15.03	13.7	2.82	2.65	4.63	2.71	4.05	4.64	5.66	4.11	2.64	2.9	2.21	2.94
Solyc01g005980	12.92	13.39	7.61	10.1	4	3.98	10.86	10.01	8.24	9.08	11.37	8.51	8.89	6.26	4.91	5.91	1.31	1.84	0.31	0.88
Solyc01g005990	59.35	55.88	19.24	18.29	99.05	101.17	40.33	37.85	35.1	39.62	25.44	18.55	9.68	8.96	7.93	10.84	0.37	0.38	0.08	0.31
Solyc01g006000	7.4	7.93	7.32	6.36	4.77	4.86	9.63	9.3	9.34	6.29	9.75	8.1	13.98	13.76	11.06	10.71	7.12	7.67	7.21	8.11
Solyc01g006010	3.17	3.28	4.56	5.06	2.5	3.34	8.93	8.17	3.49	4.37	7.85	5.55	6.89	6.68	9.25	9.34	8.44	8.11	12.9	14.41
Solyc01g006020	22.19	24.04	19.3	20.39	133.19	127.89	13.21	15.29	51.94	54.13	51.92	42.38	76.77	73.51	31.09	33.99	34.79	31.32	22.22	21.32
Solyc01g006030	7.28	7.7	13.46	11.78	4.22	4.97	10.23	9.81	6.76	7.2	5.6	6.83	8.06	8.59	10.07	7.68	10.86	9.02	9.64	9.86
Solyc01g006040	4.67	4.01	6.93	7.72	3.68	4.37	8.49	8.8	5.55	5.19	7.38	6.43	7.15	6.37	8.02	8.37	8.93	9.45	8.79	8.39
Solyc01g006050	2.64	2.89	4.14	3.53	0.07	0.14	0.66	0.37	0	0	0.1	0.09	0.14	0	0	0	0	0.07	0.05	0
Solyc01g006060	1.96	1.3	0.54	1.52	1.05	1.73	47.83	44.03	2.88	3.25	1.17	1.02	0.26	0.4	0	0	0	0.13	0	0
Solyc01g006070	2.76	3.82	0.1	0	0.5	0	2.78	1.39	0	0	0	0	0.1	0	0	0	0	0	0	0
Solyc01g006080	0	0	0	0.13	0	0	0	0	0.15	0	0	0	0	0	0	0	0	0	0	0
Solyc01g006090	7.03	7.68	8.83	8.12	5.22	5.41	11.34	12.68	14.55	13.84	9.98	8.45	6.21	6.34	8.58	9.86	4.38	4.72	13	11.64
Solyc01g006100	6.46	5.84	1.72	1.93	1.32	1.31	4.74	4.49	12.24	12.7	3.67	3.55	1.97	2.97	0.9	1.22	0.22	0.27	0	0
Solyc01g006110	36.15	36.55	44.79	44.12	32.07	31.42	51.32	45.93	45.59	40.99	37.77	34.42	35.84	39.69	47.33	42.21	48.41	49.68	69.39	67.58
Solyc01g006120	48.14	46.79	79.79	79.47	34.73	33.9	66.94	65.01	45.53	44.04	55.84	50.95	64.31	61.89	62.11	60.07	58.6	60.41	64.33	62.15
Solyc01g006130	28.66	31.74	23.9	27.51	61.58	59	5.67	5.29	31.32	26.44	23.2	23.57	33.24	31.54	36.27	35.44	19.99	18.67	15.97	16.81
Solyc01g006140	1.41	1.44	1.45	1.84	1.33	1.21	0.48	1.16	1.12	1.76	1.02	1.61	0.14	0.56	0.62	1.03	0.13	0.41	0.43	0.45
Solyc01g006150	19.95	20.23	20.2	20.37	28.12	27.62	7.79	7.99	25.38	23.1	19.81	16.65	15.17	16.21	11.54	9.59	3.43	2.7	13.32	12.22
Solyc01g006160	227.35	220.27	187.77	195.47	117.4	110.81	282.69	265.93	525.6	513.31	298.12	265.49	352.81	345.4	273.23	280.43	239.84	245.66	184	172.12
Solyc01g006170	10.47	9.95	14.61	13.34	10.85	10.45	25.41	22.51	31.72	33	21.53	16.77	8.75	10.1	20.74	21.49	11.12	12.78	35.59	34.71
Solyc01g006180	3.59	3.54	4.9	4.4	2.79	2.51	7.56	8.41	8.21	9.73	9.4	7.32	5.03	4.72	8.36	8.07	4.53	3.8	6.53	6.52
Solyc01g006190	44.54	42.37	49.55	49.32	34.44	35.76	46.36	47.65	30.31	32.97	26.79	26.86	39.42	36.37	41.68	40.48	49.77	48.86	46.88	49.03
Solyc01g006200	6.85	6.36	5.66	4.48	6.32	5.22	3.9	4.4	6.07	5.46	4.54	3.33	3.81	3.83	5.33	4.04	7.05	7.06	3.7	3.72
Solyc01g006210	3.26	3.9	1.61	1.74	0.87	0.8	2.25	1.66	6.92	7.02	3.41	3.99	1.83	1.44	1.82	2.03	1.28	0.62	0.43	0.64
Solyc01g006220	2.12	2.99	1.41	1.75	1.31	1.92	3.39	3.02	6.92	5.31	4.27	4.46	4.74	4.77	2.33	2.37	0.88	0.79	0.72	0.89
Solyc01g006230	15.72	15.89	23.3	24.21	17.11	16.75	26.44	22.8	16.27	16.29	15.03	14.95	16.2	14.95	18.61	19.19	35.75	36.59	34.31	31.71
Solyc01g006240	4.05	3.89	0.88	0.76	2.73	1.61	2.74	2.58	2.81	1.6	3.64	3.92	2.03	1.75	0.98	0.64	0	0.14	0	0
Solyc01g006250	3.03	4.27	1.76	3.63	5.59	3.94	2.73	1.36	3.15	1.6	2.57	1.68	2.61	2.63	2.92	1.93	1.65	3.84	1.69	2.45
Solyc01g006260	4.77	4.88	4.27	4.68	2.63	3.39	4.99	6.01	6.61	8.25	7.04	7.21	7.86	8.19	3.96	5.6	1.86	3.02	0.65	0.9
Solyc01g006270	0	0	0	0	0	0	0	0	0	0	0	0	0	0	0	0	0	0	0	0
Solyc01g006280	37.01	37.41	97.83	98.27	69.92	72.19	85.76	83.35	61.34	59.1	86.47	76.42	108.54	104.38	73.65	73.76	87.64	89.68	63.48	63.57
Solyc01g006290	45.76	48.19	15.9	15.88	6.52	6.88	3.66	3.73	1.5	1.43	1.15	0.6	0	0	0.94	0.77	0.37	0.3	0.36	0.25
Solyc01g006300	18.91	16.12	12.74	12.13	27.8	26.49	18.5	17.57	2.28	2.12	1.16	1.62	0.39	0.08	2.43	1.74	0	0	0	0.06
Solyc01g006310	0	0	0	0	0	0	19.46	19.51	0	0	0	0	0	0	0	0	0	0	0	0
Solyc01g006320	17.65	16.63	6.09	5.25	10.55	11.36	2.18	2.82	21.79	21.79	8.33	9.78	3.31	2.1	0.49	0.14	0.12	0.12	0.1	0
Solyc01g006330	4.95	6	4.35	3.51	55.09	58.63	0	0	2.63	2.75	1.66	1.95	1.39	0.8	0.09	0.07	0.12	0.13	0.05	0.11
Solyc01g006340	4.61	4.45	6.58	6.14	3.44	4.29	6.22	5.71	4.21	4.05	3.46	3.71	4.57	4.05	7.66	5.33	5.8	5.65	7.4	6.73
Solyc01g006350	16.85	16.36	16.13	16.35	14.12	13.08	33.24	31.34	23.57	23.5	27.43	22.76	32.61	30.23	36.72	34.33	30.25	30.19	26.88	25.93
Solyc01g006360	7.44	7.68	8.11	7.63	9.41	10.04	25.35	23.54	14.2	16.86	22	22.23	28.1	25.56	29.79	27.02	22.06	23.07	20.7	19.8
Solyc01g006370	22.28	21.84	14.78	15.23	12.93	12.86	34.85	33.26	68.81	65.87	80.79	71.72	78.49	75.62	35.12	36.47	11.88	11.65	12.45	13.3
Solyc01g006380	1.54	1.42	0.62	0.83	4.34	3.99	19.42	17.54	0.37	0.6	0.99	0.31	0.24	0.37	0	0.14	0.06	0	0.05	0
Solyc01g006390	68.2	65.2	5.68	5.01	0	0	0.84	1.17	40.59	41.93	29.99	25.3	1.12	0.8	0	0	0	0	0.12	0
Solyc01g006400	1877.62	1842.84	280.59	284.63	134.02	124.3	136.54	137.94	906.26	880.79	310.52	266.11	136.39	136.89	1.02	0.75	0.96	1.15	0.13	0.14
Solyc01g006410	0	0	0	0	0	0	0	0	0.23	0	0	0	0	0	0	0	0	0	0	0
Solyc01g006420	0	0	0	0	0	0	0	0	0	0	0	0	0	0	0	0	0	0	0	0
Solyc01g006430	330.98	322.49	890.04	898.82	88.9	93.71	504.53	489.61	234.22	225.39	329.53	273.94	439.85	434.49	442.16	436.18	255.83	252.18	206.74	199.5
Solyc01g006440	8.88	9.52	0	0.11	0	0.05	0.11	0.23	0	0	0	0	0	0	0	0	0	0	0	0
Solyc01g006450	36.03	37.33	11.03	10.66	16.32	13.82	5	4.71	78.86	81.17	81.66	72.99	45.44	47.59	27.53	27.06	17.13	17.81	37.54	40.51
Solyc01g006460	0.08	0	0	0	0	0	0	0	0	0	0	0	0	0	0	0	0	0.09	0	0
Solyc01g006470	0	0	0	0	0	0	0	0	0	0	0	0	0	0	0	0	0	0	0	0
Solyc01g006480	8.85	9.13	7.98	8.12	6.57	6.25	9.7	8.59	12.16	11.57	8.39	7.2	6.56	5.72	7.17	7.37	9.52	9.52	10.45	10.08
Solyc01g006490	3.62	3.41	4.4	3.7	2.99	4.04	9.71	9.89	5.97	3.71	8.74	7.13	6.85	7.55	13.59	15.3	15.48	16.72	17.82	19.23
Solyc01g006500	4.48	4.74	5.75	4.87	6.13	6.18	5.19	4.2	3.92	4.56	5.75	4.4	8.98	8.73	4.68	5.56	5.53	5.09	6.04	5.42
Solyc01g006510	35.1	32.1	44.75	43.19	68.99	76.81	30.4	29.56	38.25	34.88	41.75	35.05	65.36	63.26	67.92	67.07	83.76	83.38	33.29	31.36
Solyc01g006520	0.93	0.92	1.86	2.76	4.51	4.66	1.35	1.27	0.4	0.54	1.3	1.13	0.81	0.44	2.47	2.28	0.8	0.58	0.09	0.09
Solyc01g006530	0	0	0	0	0	0	0	0.04	0	0	0	0	0	0	0.16	0.09	0	0	0	0
Solyc01g006540	32.38	31.56	31.8	34.25	17.12	17.69	0.1	0.07	12.93	15.9	34.04	28.53	9.61	10.17	5.11	4.88	90.91	87.06	302.18	295.63
Solyc01g006550	0.43	0.81	1.38	1.22	1.34	2.09	1.74	0.95	0	0	0.11	0.1	0.08	0.04	2.08	1.88	0.43	0.26	0.29	0.52
Solyc01g006560	53.07	51.86	17.15	16.82	117.93	116.37	0.03	0.07	2.55	1.84	2.55	2.14	0.8	0.48	0.09	0.07	0.79	1.19	2.36	2.4
Solyc01g006570	0	0	0	0	0	0	0	0	0	0	0	0	0	0	0	0	0	0	0	0
Solyc01g006580	0	0	0	0	0	0.07	18.85	19.53	0	0.08	0	0	0	0	0	0	0.13	0.13	0.1	0.05
Solyc01g006590	0	0.05	0	0	0	0	0	0	0	0	0	0.08	0	0	0	0.07	0	0	0	0
Solyc01g006600	0	0	0	0	0	0	0	0	0	0	0	0	0	0	0	0	0	0	0	0
Solyc01g006610	0	0	0	0	0	0	1.62	2.26	0	0	0	0	0	0	0	0	0	0.2	0.08	0
Solyc01g006620	0	0	0	0.13	0	0.25	0.74	0.74	0	0	0	0	0	0	0	0	0	0	0	0
Solyc01g006630	18.16	17.59	9.14	9.4	9.1	9.79	18.59	17.75	20.68	23.2	21.21	15.95	12.8	10.98	11.67	14.19	10.32	11.14	7.75	8.31
Solyc01g006640	0	0	0	0	0	0	0.03	0.01	0	0	0	0	0	0	0	0	0	0	0	0
Solyc01g006650	4.56	3.83	6.21	6.59	0.54	0.8	0.98	1.65	0.36	0.18	0.07	0.13	0.25	0.3	0.33	0.6	0.42	0.34	0.46	0.2
Solyc01g006660	0.21	0.22	0.29	0.15	0.57	0.87	4.8	5.85	0.06	0	0	0	0	0.05	0	0	0.05	0.05	0	0
Solyc01g006670	0.41	0.63	0.3	0.49	2.15	1.6	4.56	3.14	1	1.15	2	0.98	3.06	2.43	4.19	5.09	7.3	6.81	6.21	5.89
Solyc01g006680	4.05	4.15	1.62	2.56	12.86	12.64	8.83	8.54	18.14	14.24	15.88	15.03	66.83	60.42	31.04	34.16	42.79	42.89	15.4	14.08
Solyc01g006690	9.53	8.02	11.18	11.61	10.43	9.86	13.28	11.03	3.26	2.67	2.52	2.68	2.51	1.91	3.5	3.67	9.45	9.79	0.22	0.15
Solyc01g006700	7.7	6.83	9.17	10.26	5.42	5.86	21.59	20.03	18.36	19.07	20.88	20.72	16.7	16.93	18.72	15.68	12.2	13.17	18.56	17.47
Solyc01g006710	3.26	3.79	4.52	3.68	3.7	2.77	8.92	9.47	5.04	5.37	7.46	6.97	9.46	7.93	7.86	8.8	6.12	6.6	8.25	8.49
Solyc01g006720	11.66	11.96	25.52	25.5	34.66	34	3.3	3.08	4.25	4.26	7.75	6.7	3.35	4.23	1.03	1.52	0.19	0.2	0.34	0.13
Solyc01g006730	7.95	6.65	12.72	12.41	0.18	0.14	0.05	0.05	0.45	0.23	0.2	0.18	1.16	1.16	0.81	0.72	0.18	0.36	0	0
Solyc01g006740	4	4.73	3.26	2.61	3.35	3.36	5.8	3.8	4.61	4.67	5.01	5.21	4.71	3.42	4.48	4.22	2.37	1.81	0.69	0.96
Solyc01g006750	0	0.16	0	0.94	0	0.36	0	0.57	0	0.66	0	0.93	0	1.09	0	0	0	0.88	0	0
Solyc01g006760	6.26	4.83	25.26	24.3	0	0	0	0	0	0	0	0	0.14	0	0	0	0	0	0	0
Solyc01g006770	0	0	0	0	0	0	0	0	0	0	0	0	0	0	0	0	0	0	0	0
Solyc01g006780	0.28	0.28	0.8	0.33	0	0	0.5	0.66	0.38	0.19	0.7	0.2	0.16	0.64	0	0.35	0	0	0	0
Solyc01g006790	45.66	39.06	61.78	59.24	8.34	7.14	31.25	28.97	5.02	3.77	3.16	3.62	5.76	4.45	3.42	2.82	0.25	0.39	0.31	0
Solyc01g006800	49.73	48.15	60.05	56.77	32.67	30.42	75.65	73.55	54.35	54.49	55.19	47.15	57.33	56.68	61.36	60.16	51.07	48.73	51.98	53.56
Solyc01g006810	29.79	27.37	21.16	22.28	22.82	22.68	17.96	15.04	38.22	33.61	22.53	18.71	11.71	12.17	15.19	14.55	6.06	5.81	6.44	5.8
Solyc01g006820	0	0	0.13	0	0	0.38	0	0.8	0	0.16	0.19	1.64	0	0.64	0	0	0	0.5	0.2	0.21
Solyc01g006830	40.03	38.33	22.32	26.29	139.51	135.99	44.17	44.17	111.68	110.98	90.81	73.18	52.7	56.1	52.5	52.14	37.2	39.11	37.93	40.32
Solyc01g006840	0.43	0.09	0	0	0.05	0	5.87	6.12	0.35	0.3	0	0	0	0	0	0	0	0	0	0
Solyc01g006850	0.18	0.19	0.27	0.5	0.15	0.27	1.06	0.75	0.43	0.58	0.92	0.88	0.59	0.69	1.16	0.86	0.51	0.58	0.65	0.65
Solyc01g006860	17.51	14.29	9.64	8.48	9.09	9.26	8.66	8.25	18.62	18.41	9.73	7.59	8.74	7.71	7.93	7.22	6.24	7.44	4.4	5.81
Solyc01g006870	18.64	19.57	23.03	22.07	12.34	13	14.75	13.64	11.21	9.98	18.56	16.05	16.74	17.06	10.02	9.32	7.38	7.69	4.07	3.49
Solyc01g006880	4.05	4.55	3.41	3.51	3.44	3.75	6.17	6.61	4.11	4.42	6.83	5.9	10.54	9.96	6.9	7.56	9.92	10.68	10.72	10.08
Solyc01g006890	8.39	7.55	5.92	4.68	4.85	4.94	12.79	10.55	12.71	12.5	15.52	11.83	4.83	5.06	4.1	3.99	1.72	1.52	0.78	0.56
Solyc01g006900	321.39	311.99	241.66	233.68	119.55	118.07	314.53	305.32	868.53	848.31	434.25	389.86	290.07	280.97	209.29	211.58	168.43	165.08	131.3	135.29
Solyc01g006910	0	0.12	0	0	0.77	0.26	0.82	0.82	0	0	0	0	0	0	0	0	0	0	0	0
Solyc01g006920	0.26	0.2	0.15	0.27	0.26	0.22	0.58	0.5	0.45	0.32	0.55	0.43	0.74	0.97	0.55	0.86	0.42	0.44	0.29	0.63
Solyc01g006930	3.25	4.21	5.04	4.6	6.38	5.56	57.27	53.62	3.98	3.5	7.52	8.39	7.39	8.63	36.54	34.64	16.16	16.5	8	7.96
Solyc01g006940	45.41	42.18	24.52	24.83	87.43	81.59	5.01	4.2	62.46	55.75	47.45	44.4	45.83	45.72	25.84	27.24	19.01	18.47	16.3	16.62
Solyc01g006950	0.33	0.08	1.62	2.06	1.3	1.14	15.55	17.4	1.02	1.73	1.53	1.21	0.47	0.19	13.14	10.22	0.44	0.55	1.09	1.29
Solyc01g006960	6.81	6.05	5.41	5.01	6.7	5.83	17.32	17.22	10.97	11.32	15.17	12.91	18.32	18.25	16.58	15.9	12.2	12.03	10.87	11.09
Solyc01g006970	6.72	6.2	5.93	7.31	5.34	5.47	11.07	11.73	9.21	7.89	9.47	9.88	17.87	18.6	14.44	13.57	16	14.61	13.55	12.95
Solyc01g006980	30.12	28.47	14.5	12.32	18.52	18.49	20.79	20.7	57.75	55.64	74.05	60	46.55	43.44	26.26	23.96	19.92	17.57	10.8	10.52
Solyc01g006990	17.6	12.7	12.81	12.6	8.46	9.17	13.59	13.94	15.57	15.23	20.14	15.59	18.98	16.87	13.99	13.39	16.05	15.49	19.32	16.99
Solyc01g007000	0.06	0.06	0	0.07	1.34	1	2.24	2.9	1.46	1.31	0.32	0.18	0	0.07	1.15	0.95	0.27	0.07	0.06	0.17
Solyc01g007010	0.06	0.13	0	0.08	6.69	6.88	4.67	5.79	1.39	1.41	0.53	0.56	0.22	0.14	0.87	0.56	0.14	0.21	0.06	0.06
Solyc01g007020	0.17	0.06	0.07	0.07	8.84	9.78	6.78	6.84	0.55	0.56	0.48	0.25	0	0.2	1.48	1.58	0.49	0.32	0.45	0.63
Solyc01g007030	0.06	0.06	0	0.14	1.45	1.35	2.45	2.3	0.73	0.57	0.3	0.17	0	0.07	0.36	0.52	0.25	0.13	0.05	0.16
Solyc01g007040	0	0.08	0	0	3.19	2.14	7.53	8	1.9	1.02	0.68	1.19	0	0.28	2.11	1.74	0.26	0.54	0.14	0.3
Solyc01g007050	0	0	0	0	0.08	0.08	0.08	0	0.37	0.09	0.11	0.4	0.08	0.08	0.31	0	0	0	0	0
Solyc01g007060	5.16	6.45	6.45	5.92	5.79	5.96	10.77	9.51	7.31	5.58	7	4.49	5.8	6.46	5.95	6.01	6.67	7.09	8.36	7.74
Solyc01g007070	30.75	29.13	68.07	65.84	15.62	16.51	48.88	46	65.78	63.48	125.1	110.39	178.52	171.83	132.74	132.67	155.9	152.02	95.23	95.81
Solyc01g007080	0.58	0.59	0.27	0.07	0	0.07	0	0	0	0	0	0	0	0	0	0	0	0	0	0
Solyc01g007090	0	0.05	0.05	0	0	0	0	0	0	0	0	0	0	0	0	0	0	0	0	0
Solyc01g007100	10.75	9.03	19.67	16.31	29.57	28.66	2.73	2.08	6.36	5.64	9.64	8.16	5.8	5.88	5.36	8.24	1.2	1.56	6.5	6.4
Solyc01g007110	63.59	66	94.66	92.87	23.35	20.57	40.63	40.57	52.49	48.53	46.03	41.46	69.3	67.14	86.74	91.88	67.57	71.99	143	138.01
Solyc01g007120	10.5	11.36	13.82	12.9	10.81	10.21	17.31	14.74	14.17	15.08	12.95	10.39	9.83	8.98	15.89	15.52	12.95	13.05	16.8	17.97
Solyc01g007130	3.37	3.37	5.08	4.55	3.59	3.38	28.45	27.01	3.31	2.84	4.87	3.2	3.5	3.57	9.24	8.46	1.67	0.99	0.76	0.61
Solyc01g007140	1.93	1.94	1.79	1.7	1.71	1.77	4.36	4.35	3.1	2.63	3.07	2.84	2.15	2.39	3.36	2.45	1.42	1.22	3.03	3.67
Solyc01g007150	25.49	23.94	18.83	19.14	15.51	15.25	45.48	43.61	47.94	50.25	71.85	61.55	64.7	61.91	65.94	63.22	42.51	43.12	36.9	38.06
Solyc01g007160	1.98	1.65	0.51	0.53	0.42	0.25	1.14	1.41	4.37	3.19	2.23	1.84	0.34	0.34	0.68	0.65	0.32	0	0	0.27
Solyc01g007170	0.53	0.9	0.24	0.07	0.3	0.24	4.54	4.18	1.5	1.44	0.65	0.35	0.13	0.1	0	0.11	0	0.03	0	0
Solyc01g007180	4.53	5.49	4.41	4.53	3.7	4.01	4.67	4.67	3.65	5.18	4.28	4.35	8.21	5.71	5.19	7.89	7.99	8.63	6.55	5.84
Solyc01g007190	2.36	1.85	3.11	2.64	0.71	1.64	4.16	4.62	0.65	0.55	2.53	2.44	6.96	7.18	4.73	3.4	5.13	4.78	8.05	7.71
Solyc01g007200	6.67	6.74	5.42	4.14	0.18	0.46	0.48	0.19	1	0.68	0.41	0.24	0.28	0.56	0	0	0	0.09	0.07	0
Solyc01g007210	43.2	42.92	105.04	102.38	0	0	0.25	0	0.29	0	0	0	0.48	0.24	0	1.06	0	0	0	0
Solyc01g007220	73.83	73.8	101.76	97.92	45.92	48.07	389.43	379.79	37.29	34.65	122.69	117.59	342.6	331.03	502.39	505.24	356.4	375.62	87.16	82.96
Solyc01g007230	14.76	16.3	11.48	10.65	11.19	10.72	17.6	15.82	10.7	9.48	13.57	12.54	6.51	7.9	13.1	12.31	18.99	18.9	11.83	13.1
Solyc01g007240	13.05	13.22	40.45	37.61	0	0	0.15	0	0	0	0	0	0.29	0.29	0	0.16	0	0	0	0
Solyc01g007250	8.13	8.06	9.16	9.43	6.54	6.59	20.33	16.66	14.01	16.82	13.86	11.07	11.95	11.03	14.72	15.14	11.64	11.08	15.72	16.68
Solyc01g007260	1.06	1.18	0.75	0.81	0.77	1.3	10.65	10.94	0.4	0.23	0.54	0.62	0.59	0.48	0.1	0.12	0.1	0.04	0.06	0.12
Solyc01g007270	0	0	0	0	0	0	0	0	0	0	0.68	0	0	0	0	0	0	0	0	0
Solyc01g007280	0.18	0.54	0.41	0.32	1.2	0.41	0.42	0.32	0.85	1.11	2.09	1.43	0.81	1.62	0.14	0.56	0.29	0.49	0.55	0.65
Solyc01g007290	0	0.18	0.62	0.86	4.46	4.34	0.43	0.21	0.74	0.5	2.12	3.69	0.82	1.24	0.83	1.14	0.19	0.2	0.32	1.32
Solyc01g007300	0.88	1.03	1.46	1.05	7.13	8.87	0.3	0.75	1.22	0.35	3.62	3.9	3.18	2.62	2.13	1.44	1.09	0.71	2.24	1.63
Solyc01g007310	1.78	0.91	3.36	2.93	11.09	9.75	0.27	0.53	0.31	1.56	2.26	1.64	1.27	2.05	2.4	1.13	0	0.25	1.98	2.47
Solyc01g007320	30.77	29.3	82.86	77.49	296.71	292.55	48.27	45.81	91.49	89.17	473.85	421.45	472.36	446.32	201.94	191.48	120.39	124.58	114	113.79
Solyc01g007330	18.22	17.88	19.62	17.93	68.45	65.76	2.94	2.94	17.05	15.72	69.91	58.43	72.4	74.98	5.77	6	2.16	2.08	38.49	38.03
Solyc01g007340	0.49	0.32	0.41	0.32	0.25	0.46	0.8	0.85	0.31	0.38	2.19	1.38	1.58	1.54	0.27	0.34	0.29	0	2.89	3.54
Solyc01g007350	1.45	0.89	0.84	0.87	2.63	1.51	0.7	0.7	0.6	0.61	4.67	2.57	3.5	3.52	0.89	0.18	0.63	0.49	1.42	2.15
Solyc01g007360	0.61	0.46	0.18	0.54	1.37	1.05	0.36	0.36	0.63	1.28	4.36	2.45	1.74	1.75	0	0.58	0.66	0.17	2.15	2.8
Solyc01g007370	0.92	0.35	0.54	0.55	2.23	1.6	0.55	0.28	1.28	1.46	4.3	4.09	3.97	4	2.14	1.03	0.63	0.26	1.75	1.71
Solyc01g007380	0.62	0.73	0.41	0.42	1.51	2.35	0.96	0.42	1.11	0.5	4.05	3.53	4.17	4.09	1.09	1.13	0.29	1	1.73	3.19
Solyc01g007390	0	0.97	0	0	1.07	1.09	2.28	3.41	0	0	4.82	2.8	0	0	0	1.21	0	0	0	1.75
Solyc01g007400	14.23	15.94	16.54	11.35	38.39	37.54	7.32	6.5	23.47	19.99	26.38	23.97	21.76	28.15	11.48	17.23	6.62	12.18	18.07	18.78
Solyc01g007410	28.45	38.61	23.63	33.35	72.4	87.14	11.15	10.44	44.26	32.63	43.26	32.53	43.96	38.2	24.15	36.17	13.86	13.05	24.27	22
Solyc01g007420	0.39	0.8	0.91	0.93	3.98	2.7	0	0.47	2.7	1.64	4.62	5.17	1.34	4.5	0	0	0.42	0	0.35	0.36
Solyc01g007430	0	0.31	1.4	1.44	1.71	2.79	0	0.36	1.25	2.12	3.57	3.11	3.11	5.92	0.93	0.38	0.65	0.34	1.61	2.79
Solyc01g007440	19.79	23.41	16.54	30.34	100.96	107.11	5.2	1.48	12.86	9.56	23.04	17.33	34.77	24.27	18.1	18.87	6.71	7.65	14.85	12
Solyc01g007450	0.85	1.3	1.48	1.52	14.92	10.3	1.02	0.51	2.94	5.37	5.75	7.51	1.95	3.92	1.31	0.54	1.84	0.95	2.64	5.1
Solyc01g007460	0.83	0.85	0.32	0.33	7.85	6.4	0.67	0.33	3.46	2.34	2.35	3.68	2.54	4.16	0.85	2.82	1.2	1.25	0.49	1.02
Solyc01g007470	2.21	2.48	2.05	1.06	4.25	3.56	1.32	0.53	2.75	4.03	7.84	5.53	6.07	3.82	1.7	1.4	1.2	0.74	1.57	3.47
Solyc01g007480	0.35	0.36	0.41	0	0	0.41	0	0	0	0.49	0	0.52	0	0.41	0	0	0.38	0.39	0	0
Solyc01g007490	12.18	12.82	23.55	22.14	35.17	40.82	37.24	39.58	19.96	21.22	45.99	40.92	29.55	32.43	29.22	27.39	15.25	16.19	15.41	16.12
Solyc01g007500	5.47	5.22	4.97	6.49	15.62	13.84	0.17	0.17	4.84	4.91	19.91	16.6	24.61	25.98	2.19	1.93	0.7	0.41	1.59	1.87
Solyc01g007510	0	0	0	0	0	0	0	0	0	0	0	0	0	0	0	0	0	0	0	0
Solyc01g007520	0.96	0.49	0.7	0.14	0.95	2.22	0	0.43	0.83	0.67	3.46	5.66	3.17	5.68	0.55	0.31	0	0.27	0.21	0.22
Solyc01g007530	1.69	1.65	1.12	1.16	5.84	5.48	0.19	0.1	2.34	0.79	9.27	7.01	10.62	9.39	0.99	0.92	0.35	0.81	3.65	2.75
Solyc01g007540	1	0.51	0.44	0.75	2.12	2.74	0	0.45	0.35	0.53	6.56	4.61	6.16	6.06	0.39	0	0.14	0.28	0.89	0.92
Solyc01g007550	2.85	2.33	2.65	1.36	10.32	5.26	0	0.68	0	1.6	6.74	5.87	4.57	5.91	0	0.72	0	0	0.51	1.05
Solyc01g007560	0.39	0	0.34	0.12	0.55	0.34	0.23	0.47	0.13	0.27	1.32	1.58	1.34	1.35	0.15	0.62	0.21	0.11	0.35	0.27
Solyc01g007570	0.38	0.17	0.25	0.2	0.62	0.57	0.52	0.59	0.23	0.46	1.48	2.01	1.94	1.7	0.25	0.49	0.24	0.06	0.73	0.91
Solyc01g007580	0.32	0.11	0.06	0.06	0.42	0.31	0.64	0.32	0.22	0.07	2.17	1.57	0.92	1.11	0	0.14	0.17	0	0.47	0.15
Solyc01g007590	0.24	0.57	0.65	0.38	0.72	0.64	0.67	0.19	0.44	0.34	1.89	2.35	2.01	1.75	0.37	0.4	0	0.27	0.99	1.03
Solyc01g007600	1.1	0.84	0.96	1.09	1.14	2.11	1.42	0.88	1.52	2.05	7.73	5.79	5.45	4.21	1.13	1.04	0.99	0.51	2.52	2.87
Solyc01g007610	0.51	0.7	0.8	1.26	1.25	1.54	0.72	0.88	1.65	1.16	5.44	4.87	2.26	3.13	0.99	0.7	0.2	0.72	2	2.16
Solyc01g007620	0.49	3.01	2.28	1.76	0.56	2.83	2.94	2.94	8.16	2.76	18.27	11.57	5.63	3.96	0.76	1.25	0	1.1	4.8	8.16
Solyc01g007630	7.98	6.97	8.53	10.54	16.84	19.75	5.4	5.09	10.96	10.12	33.21	26.08	38.22	38.46	16.55	17.83	12.63	11.57	22.71	25.44
Solyc01g007640	0.07	0.14	0.12	0.13	0.13	0.08	0.3	0.32	0.21	0.21	0.75	0.64	0.56	0.72	0.14	0.1	0.05	0.04	0.5	0.44
Solyc01g007650	0.14	0.14	0.16	0	0.63	0.64	0.33	1	0.38	0.39	1.17	1.23	0.96	1.28	0.21	0	0.6	0.16	0.49	0.77
Solyc01g007660	1.77	1.61	2.86	2.51	10.1	8.19	0.44	0.72	3.24	4.25	8.53	8.68	10.87	9.73	4.41	3.74	2.54	2.72	5.99	5.14
Solyc01g007670	58.92	56.23	72.2	66.69	270.48	262.82	7.24	9.07	60.06	50.56	87.86	75.55	94.77	96.99	55.6	57.19	38.81	35.02	72.69	68.24
Solyc01g007680	0	0	0	0	0	0	0	0	0	0	0	0.64	0	0.25	0	0	0	0	0.19	0
Solyc01g007690	0.25	0.09	0.1	0.71	0.29	0.1	0	0	0.35	0.47	0.43	0.37	0.77	0.49	0	0	0	0	3.83	3.51
Solyc01g007700	0	2.69	0	6.49	0	0	0	0.19	0	6.09	0	0	0	0	0	0	0	0	0	0
Solyc01g007710	0	0	0	0	0	0	0	0	0	0	0	0	0	0	0	0	0	0	0	0
Solyc01g007720	8.48	8.57	15.01	13.72	26.21	24.47	3.24	3.81	17.09	16.38	33.76	27.98	25.97	24.46	2.37	3.06	1.15	1.95	157.81	160.26
Solyc01g007730	0	0	0	0	0	0	0	0	0	0	0	0	0	0	0	0	0	0	0	0
Solyc01g007740	46.22	42.81	39.89	33.38	22.22	24.46	25.79	27.84	62.49	56.68	75.96	66.04	63.66	63.88	61.21	63.85	55.64	54.83	79.8	77.07
Solyc01g007750	5.23	5.09	7.81	5.26	8.74	9.96	2.09	1.79	5.86	6.29	15.03	13.33	14.75	15.61	9.58	9.07	5.31	5.13	6.27	5.9
Solyc01g007760	8.72	6.85	7.54	6.94	6.45	5.83	12.13	11.35	13.56	12.03	11.43	9.88	8.54	9.27	12.29	13.79	15.47	12.73	19.86	19.07
Solyc01g007770	4.58	5.89	9.69	11.38	6.79	6.37	17.62	17.87	10.58	11.38	9.34	8.83	7.81	7.05	16.46	16.87	12.74	12.8	19.21	21.16
Solyc01g007780	2.17	2.89	2.08	1.35	1.82	2.4	16.87	17.07	1.05	0.8	0.32	0.7	0.43	0.54	0.58	0.36	0.1	0.21	0.75	0.52
Solyc01g007790	16.7	14.94	9.9	10.27	6.61	8.17	9.59	8.24	15.25	14.17	16.64	15.07	17.51	15.57	14.53	14.24	9.81	11.78	22.37	21.43
Solyc01g007800	1.15	2.06	1.34	1.83	1.52	0.88	0.92	1.03	0.66	0.27	0.16	0	0	0	0	0	0	0	0	0
Solyc01g007810	5.04	5.35	1.55	2.16	7.12	7.58	0.69	0.23	1.85	2.41	0.48	0.7	0.11	0	0	0	0	0.11	0	0
Solyc01g007820	4.55	5.05	4.85	4.54	3.87	3.94	13.66	9.55	4.73	5.33	8.35	6.71	5.22	6.13	2.92	3.86	5.76	3.84	7.76	5.26
Solyc01g007830	0.52	0	0.3	0	0.59	0	0.31	0.31	0.36	0	0	0.38	0.3	0.6	0	0	0.28	0.29	0.23	0.72
Solyc01g007840	11.66	11.09	9.67	11.61	6.84	6.02	11.06	11.73	12.54	13.74	23.05	14.79	17.3	15.71	15.95	17	18.49	18.78	25.95	26.14
Solyc01g007850	2.86	3.09	2.88	2.9	2.65	3.36	3.2	2.8	2.11	2.29	3.91	3.37	4.31	4.11	3.98	3.32	3.39	4.16	4.57	4.83
Solyc01g007860	95.01	86.48	125.21	118.19	73.36	74.07	151.08	146.29	146.71	144.68	171.27	154.34	224.1	216.35	128.68	127.18	146.58	137.02	90.97	91.06
Solyc01g007870	20.51	18.52	4.08	5.08	4.19	3.84	1.77	1.55	9.22	10.12	5.94	3.54	3.81	3.41	0.85	0.94	0.2	0.62	0.49	0
Solyc01g007880	4.31	4.58	3.52	4.01	6.13	6.58	3.59	3.86	5.66	6.33	6.32	6.79	7.01	6.2	6.25	6.51	3.74	3.36	6.81	6.72
Solyc01g007890	5.86	5.3	4.45	4.13	12.93	16.21	11.62	12.24	3.33	4.54	3.69	4.43	5.25	5.11	0.81	1.05	1.06	1.18	0.13	0.35
Solyc01g007900	16.99	18.85	13.57	13.55	8.35	7.17	18.26	14.64	15.89	16.2	16.29	13.68	12.13	10.24	21.13	19.69	20.29	19.86	27.49	27.49
Solyc01g007910	42.49	39.85	35.23	30.79	21.71	17.84	82.14	82.49	73.36	72.3	65.21	59.04	39.19	40	53.89	51.18	38.49	39.74	50.31	50.13
Solyc01g007920	17.67	14.49	19.59	15.34	21.38	21.77	15.03	14.48	15.5	14.24	17.54	16.82	32.58	35.28	42.37	38.2	45.46	44.32	39.98	38.86
Solyc01g007930	10.23	11.54	9.51	9.72	7.17	6.51	7.51	6.32	10.05	10.28	11.12	9.32	22.9	24.4	13.37	12.22	7.87	8.15	12.51	11.4
Solyc01g007940	0	0	0.07	0	0.07	0.07	0	0	0	0	0	0	0	0	0	0	0	0	0.11	0.06
Solyc01g007950	99.95	98.6	137.26	136.99	0.8	0.56	0.49	0.52	2.25	2.28	2.42	1.99	1.67	2.34	0.79	0.65	0.18	0.03	0.38	0.35
Solyc01g007960	0.13	0.04	0.15	0.2	0.19	0.1	9.52	7.87	0	0.06	0.22	0.19	0.2	0.05	0.39	0.27	0.32	0.1	0.04	0
Solyc01g007970	0.43	0.53	0.4	0.62	0.29	0.3	1.61	1.92	0.42	0.67	0.29	0.26	0.75	0.55	0.53	0.61	0.52	0.44	0.12	0.04
Solyc01g007980	5.51	6.09	6.21	7.46	7.02	6.12	1.41	1.65	4.49	6.14	9.25	8.84	11.61	10.84	11.04	12.1	6.11	6.37	1.55	1.68
Solyc01g007990	4.09	3.05	2.93	4.25	2.42	3.09	7.88	5.95	5.5	6.22	6.01	4.62	6.75	5.55	4.59	4.95	3.56	2.83	4.14	3.64
Solyc01g008000	575.75	571.54	627.58	620.49	254.31	265.76	390.03	368.6	525.74	533.12	443.27	385.06	752.76	734.37	1068.86	1042.57	921.19	920.74	421.45	433.12
Solyc01g008010	44.45	46.21	94.52	99.07	15.7	14.93	7.8	6.61	15.01	13.38	9.89	8.42	5.42	4.47	5.87	5.59	1.78	2.95	2.1	2.31
Solyc01g008020	27.38	24.98	27.58	25.21	52.92	59.14	70.35	69.19	39.08	36.34	21.04	18.14	34.01	31.53	5.44	6.82	0.55	0.43	0.11	0
Solyc01g008030	0.5	0.51	0	0	0	0.29	40.38	43.03	0.7	0	0	0	0.58	0	0	0.32	0	0	0	0
Solyc01g008040	3.62	2.24	0.7	0.81	0	0	0.09	0.09	0	0	0	0	0	0	0	0	0.08	0.08	0	0
Solyc01g008050	21.71	22.99	7.5	5.66	0.13	0	5.04	5.03	0.08	0	0.1	0.09	0	0.07	0	0	0	0	0	0
Solyc01g008060	35.7	32.92	32.75	29.38	23.79	26.84	31.7	32.38	33.12	30.69	30.18	26.8	29.49	27.58	23.05	20.36	18.09	14.56	15.09	14.9
Solyc01g008070	37.43	34.36	48.38	45.8	34.94	37.6	15.79	13.33	25.43	21.97	26.86	23.06	50.12	46.85	52.7	49.31	108.54	106.9	154.78	157.09
Solyc01g008080	106.71	107.53	105.88	106.98	53.38	52.42	121.6	122.5	259.29	251.78	228.35	210.05	339.49	324.72	280.27	283.24	221.26	219.37	65.67	65.02
Solyc01g008090	460.66	466.56	440.51	434.56	252.86	242.34	566.94	561.21	1154.02	1107.55	896.13	844.15	852.03	821.74	794.16	784.84	634.52	617.63	359.41	338.65
Solyc01g008100	32.45	31.01	20.71	19.99	13.85	14.36	22.34	19.85	32.94	29.88	41.48	30.81	29.54	25.39	28.34	24.04	19.72	21.01	5.43	4.22
Solyc01g008110	241.21	235.42	155.84	154.32	141.8	144.64	335.79	326.46	590.27	565.38	384.29	326.23	156.81	152.15	137.23	135.42	200.99	202.43	164.64	164.35
Solyc01g008120	8.69	8.44	12.85	13.01	11.28	11.63	30.02	29.07	12.87	11.12	17.13	14.16	19.25	17.15	17.65	17.01	16.4	15.53	20.39	19.17
Solyc01g008130	6.37	5.27	39.09	35.03	1.88	2.9	17.22	16.28	0.81	1.13	2.73	2.78	7.97	8.9	14.78	15.62	5.45	4.58	1.32	1.16
Solyc01g008140	3.65	3.56	7.68	8.56	3.16	2.68	27.85	26.04	3.72	3.15	7.47	6.4	9.62	8.37	6.8	7.21	8.99	8.12	4.6	4.19
Solyc01g008150	1.14	0	0	0	4.51	1.31	0.68	0	0	0	0	0	0	0.66	0	0	0	0	0.51	0
Solyc01g008160	13.84	12.28	11.63	11.22	8.04	7.72	4.8	5.14	24.17	21.77	20.33	17.03	16.26	13.53	14.62	14.76	23.26	23.2	31.42	31.33
Solyc01g008170	11.49	11.61	18.88	19.3	9.79	11.29	20.47	17.41	19.93	16.85	22.53	18.84	23.5	22.98	23.58	22.14	16.38	16.96	15.17	12.27
Solyc01g008180	15.34	15.82	11.12	10.93	14.3	15.99	13.41	14.11	14.66	14.03	7.34	7.33	8.29	8.43	8.84	11.67	7.93	7.93	3.1	3.06
Solyc01g008190	8.52	7.2	12.21	13.6	6.02	7.84	13.64	13.03	8.22	7.81	6.27	5.83	10.06	10.26	6.85	7.54	10.72	10.41	12.52	13.7
Solyc01g008200	6.06	8.7	9.56	12.25	4.09	4.33	9.69	8.12	6.39	6.89	6.35	7.02	9.59	6.82	6.22	8.98	6.57	9.07	9.74	10.39
Solyc01g008210	7.53	7.93	4.19	5.09	2.1	1.89	8.25	9.68	4.99	5.21	4.99	6.44	10.64	8.94	10.76	10.27	3.32	2.09	3.3	3.13
Solyc01g008220	1.42	2.37	2.25	1.54	0.88	0.74	4.17	2.78	1.61	1.45	4.36	2.66	3.84	5.35	4.76	6.55	1.26	0.87	1.37	1.43
Solyc01g008230	55.87	51.77	47.29	44.96	43.41	38.98	30.17	30.21	108.17	105.22	89.25	78.12	140.87	139.45	102.09	96.05	58.41	60.28	79.54	72.32
Solyc01g008240	583.17	566.87	616.39	615.58	0.24	0.3	1.49	0.72	0.71	0.48	0.22	0.19	1.87	2.13	0.93	0.76	0.37	0.14	0.04	0.12
Solyc01g008250	29.47	26.07	32.98	27.54	108.69	109.33	4.79	3.66	20.95	17.78	22.29	20.29	21.43	17.45	14.39	15.44	9.49	11.45	12.61	12.01
Solyc01g008260	14.57	16.59	13.12	15.08	6.83	6.2	10.39	10.77	12	12.01	8.16	7.11	11.56	9.74	20.25	16.86	15.58	13.42	15.69	13.77
Solyc01g008270	39.24	44.65	29.13	28.83	27.62	30.36	72.71	66.83	87.77	92.26	66.2	61.51	69.17	66.26	55.14	55.31	36.9	37.91	51.18	48.09
Solyc01g008280	12.45	11.66	17.43	19.46	7.52	9.07	27.82	27.25	20.09	19.27	31.28	28.39	33.25	31.54	43.2	39.39	41.54	39.48	40.63	37.73
Solyc01g008290	7.69	6.55	6.41	3.74	5.46	4.76	10.48	10.77	6.74	7.25	5.97	6	5.41	3.84	5.12	4.92	1.78	1.56	7.11	6.1
Solyc01g008300	2.28	1.8	2.53	3.22	2.35	2.75	14.9	15.13	1.43	1.45	2.28	1.53	1.66	2.15	5.1	4.21	5.73	5.81	1.93	1.72
Solyc01g008310	28.37	27.33	33.37	30.64	18.98	22.56	52.12	50.96	45.72	41.02	49.92	43.17	57.09	52.49	56.53	56.57	48.14	51.39	49.21	49.77
Solyc01g008320	10.11	8.73	15.45	14.46	9.43	9.54	21.44	20.51	9.41	10.52	16.39	13.8	21.96	20.12	25.13	24.75	34.3	32.91	61.31	61.09
Solyc01g008330	65.4	60.45	39.46	31.53	50.15	49.27	43.94	43.33	120.46	112.1	114.07	86.8	78.5	74.04	44.49	40.58	50.25	49	70.96	73.53
Solyc01g008340	13.02	13.45	9.54	9.35	9.89	10.3	21.8	20.99	24.09	21.22	27.01	19.68	12.55	11.35	17.25	22.02	16.39	16.39	25.24	23.83
Solyc01g008350	0.08	0.08	0	0	0	0	0	0.03	0	0.07	0.22	0.15	0.5	0.59	0.04	0.23	0.03	0.09	0.09	0.1
Solyc01g008360	88.07	88.01	72.04	73.73	38.06	38.63	41.52	46.62	77.56	76.56	44.98	39.84	44.74	47.76	49.63	44.56	44.65	51.97	51.38	51.51
Solyc01g008370	65.06	63.3	69.69	69.07	48.96	49.64	120.51	114.36	106.25	103.43	112.67	94.87	126.93	120	66.14	67.21	78.61	79.16	102.84	105.5
Solyc01g008380	0.2	0.61	0.93	0.24	1.58	0	2.15	1.43	3.03	1.12	0.67	2.35	3.65	2.3	2.45	2.02	0	1.34	3.01	1.84
Solyc01g008390	0	0	0	0	0	0	0	0	0	0	0	0	0	0	0	0	0	0	0	0
Solyc01g008400	1.42	0.72	0.82	0	0	0	0	0.42	1.47	0.5	0.6	0.52	2.44	1.23	1.64	0.45	1.15	1.59	0.63	0.33
Solyc01g008410	0	0	0	0	0	0	0.05	0	0	0	0	0	0	0	0	0	0	0	0	0
Solyc01g008420	5.68	4.28	3.75	3.97	0	0.31	0.55	0.27	3.15	4.66	7.62	7.71	8.24	8.92	6.16	7.63	4.89	5.88	0.57	0.71
Solyc01g008430	0	0	0.09	0	0	0	0	0	0	0	0	0.11	0	0	0	0	0	0	0	0
Solyc01g008440	22.88	24.07	34.01	32.42	7.73	6.29	6.15	6.09	2.85	3.34	5.11	4.66	5.57	4.65	7.4	6.98	2.14	1.8	10.54	9.81
Solyc01g008450	0.1	0	0	0	0	0	0.25	0.25	0	0.14	0	0	0	0	0	0	0	0	0	0
Solyc01g008460	15.6	13.76	13.82	11.66	8.8	6.67	14.27	10.19	14.07	15.31	12.44	10.83	12.88	11.81	14.12	13.96	11.2	10.67	12.11	13.81
Solyc01g008470	12.54	14.6	8.91	7.61	5.95	6.27	9.49	10.66	11.3	12.76	10.35	6.83	5.17	5.92	5.8	5.89	3.69	2.78	3.63	4.11
Solyc01g008480	3.48	2.95	2.76	3.11	5.06	4.18	5.8	5.51	4.7	3.98	5.35	5.41	6.34	6.92	7.59	7.44	5.19	6.01	6.57	5.32
Solyc01g008490	6.61	8.02	6.48	7.68	8.01	7.11	9.41	7.15	8.53	7.56	7.79	7.17	10.41	9.57	11.38	10.05	14.42	14.35	14.24	15.51
Solyc01g008500	0.18	0.43	0.14	0.07	0.34	0.42	1.45	1.02	0.08	0.17	0.1	0.36	0.62	0.42	0.84	0.62	0.13	0	0.05	0.06
Solyc01g008510	0	0.14	0.16	0.33	0	0.32	0.49	0.49	0	0	0.23	0	0.16	0	0.42	0	4.61	2.62	17.42	20.26
Solyc01g008520	1.73	0.84	0.67	1.28	1.3	1.33	1.87	2.26	1.71	2.31	4.17	4	7.16	6.83	5.06	3.97	1.34	1.38	0.88	1.52
Solyc01g008530	32.42	33.03	5.49	5.57	11.92	11.12	8.16	7.47	14.39	13.35	9.38	8.35	7.58	6.1	2.91	2.24	0.61	0.71	0.28	0.17
Solyc01g008540	0.07	0.69	0.78	0.56	0	0	0.08	0	2.51	2.08	0.8	0.79	1	1.71	0	0	2.84	2.49	0	0.12
Solyc01g008550	160.58	154.24	130.28	116.77	128.45	124.06	140.98	146.6	204.1	203.42	128.01	111.02	105.51	104.39	31.3	30.29	11.27	11.81	2.1	2.24
Solyc01g008560	16.71	13.12	16.63	16.31	9.17	8.67	18.02	18.64	11.52	12.18	9.31	8.57	6.87	6.14	18.45	19.09	7.66	8.84	16.14	17.47
Solyc01g008570	0	0.33	0	0	0.12	0.13	0	0.52	0	0	0	0	0	0	0.17	0	0	0	0	0
Solyc01g008580	0	0	0	0	0	0	0	0	0	0	0	0	0	0	0	0	0	0	0	0
Solyc01g008590	0	0	0	0	0	0	0	0	0	0	0	0	0	0	0	0	0	0	0	0
Solyc01g008600	15.36	14.48	8.12	7.39	3.14	3.01	3.71	3.61	58.87	58.33	32.87	29.22	12.79	12.18	7.97	6.94	4.57	5.14	5.89	5.49
Solyc01g008610	3.11	2.94	7.88	5.63	0	0	0.86	0.76	0	0	0	0	0	0	0	0	0	0	0	0
Solyc01g008620	0.84	0.93	1.54	1.75	1.26	1.13	31.47	30.09	0.1	0.1	0.24	0.1	0.4	0.4	0	0.53	0.15	0.08	0.37	0.52
Solyc01g008640	0	0	0.06	0	0	0	4.09	5.43	0	0	0	0	0	0	0	0	0	0	0	0
Solyc01g008650	0.1	0	0.23	0.23	0	0	15.93	15.44	0	0	0	0	0	0	0	0	0	0	0	0
Solyc01g008660	3.02	2.53	3.51	3.06	3.68	3.75	5.39	5.01	6.43	5.98	6.81	5.25	7.72	5.98	7.51	6.79	3.61	2.44	6.61	5.86
Solyc01g008670	14.48	12.9	14.48	14.11	6.2	5.55	0.43	0.36	0.28	0.64	0.17	0.07	0.23	0.29	0.08	0.64	0.05	0.11	0.18	0.14
Solyc01g008680	24.14	24.4	11.5	14.27	0.16	0	0.35	0.7	0.2	0.41	1.23	0.21	0.17	0.5	0.45	0.92	2.05	1.47	4.01	4.43
Solyc01g008690	0	0.08	0	0.1	0.18	0.18	7.62	8.66	0.33	0.56	0.81	0	0	0	0	0.1	0	0	0	0
Solyc01g008700	12.3	10.92	7.48	6.65	11.04	10.6	4.12	3.22	11.94	11.93	10.04	8.19	9.24	11.53	14.24	15.16	85.17	84.21	28.15	30.01
Solyc01g008710	0	0	1.58	1.41	0.07	1.84	0	0	0.08	0.08	0	0	0.07	0	1.55	1.35	804.53	787.54	119.45	120.81
Solyc01g008720	0.07	0	0.16	0.08	0	0.08	0	0	0.1	0.1	0	0	0.08	0	0	0	31.03	31.18	3.84	5.49
Solyc01g008730	11.28	12.62	16.72	13.57	7.62	8.98	17.96	16.89	9.32	6.82	9.7	8.1	14.62	11	13.87	14.57	19.92	19.71	13.41	15.51
Solyc01g008740	5.51	6.01	1.71	2.58	0	0	0	0	0	0	0	0	0.06	0.06	0	0	0	0	0	0
Solyc01g008750	0.03	0	0	0	0.04	0	0.04	0	0	0	0	0	0	0	0	0	0	0.08	0	0
Solyc01g008760	4.94	3.7	2.36	2.64	2.1	2.95	3.28	3.59	6.6	5.7	7.02	4.94	6.07	7.43	5.57	4.37	3.25	4.06	2.82	2.69
Solyc01g008770	20.36	18.74	15.59	16.84	20.79	20.7	24.07	22.16	26.65	26.24	25.78	21.44	21.27	21.33	17.42	18.13	7.78	9.24	9.64	10.91
Solyc01g008780	39.04	41.31	53.03	55.24	67.67	72.03	18.15	15.28	19.09	16.69	21.85	18.68	31.06	26.41	29.4	30.2	29.3	31.68	59.36	61.76
Solyc01g008790	18.01	17.11	5.43	6.53	24.93	26.3	6.38	5.54	59.45	61.93	67.72	58.98	55.36	53.66	41.91	39.84	9.24	9.18	0.53	0.82
Solyc01g008800	1.09	1.13	0.82	1.04	2.34	2.26	4.96	4.82	0.83	0.93	1.33	0.85	0.66	0.54	2.03	1.71	1.43	1.68	1.02	0.75
Solyc01g008810	29.76	30.68	31.59	32.24	20.02	19.28	23.61	20.64	25.82	28.05	17.59	17.84	31.76	25.96	16.58	16.8	13.93	14.51	8.84	9.67
Solyc01g008820	54.3	52.61	33.72	31.89	35.8	36.73	37.27	38.84	38.81	36.29	26.84	25.88	19.33	17.07	27.58	23.14	38.35	39.12	42.97	41.4
Solyc01g008830	2.38	2.49	4.85	3.8	8.61	8.2	0.06	0	0.41	0.35	0.34	0.22	0.51	0.57	0.46	0.95	0.54	0.78	0.13	0.18
Solyc01g008840	34.61	33.51	40.79	41.28	23.33	24.44	30.49	31.08	37.04	37.92	35.12	27.86	24.34	26.14	38.56	41.78	40.08	40.74	45.88	47.34
Solyc01g008850	68.09	66.49	134.29	133.65	62.72	55.79	10.3	9.83	42.29	46.23	44.4	36.51	45.28	46.44	87.24	83.12	96.62	94.65	117.34	116.07
Solyc01g008860	0	0	0	0	0	0	0	0	0	0	0	0	0	0	0	0	0	0	0	0
Solyc01g008870	0	0	0	0	0	0	0	0	0	0	0	0	0	0	0.23	0.1	0	0	0	0
Solyc01g008880	0	0.29	0.17	0.17	0	0.33	0	0	0	0	0	0	0	0.16	0.22	0	0.15	0	0	0
Solyc01g008890	12.16	13.47	17.32	15.67	11.67	14.04	11.58	11.99	10.77	10.11	10.24	8.49	13.13	12.38	7.43	8.69	6.95	4.69	8.26	8.85
Solyc01g008900	3.12	3.52	2.65	2.03	3.3	4.1	4	3.55	5.36	5.36	5.47	4.68	3.04	3.06	4.24	4.11	3.1	2.92	3.3	4.01
Solyc01g008910	2.35	1.75	6.29	6.59	1.18	1.56	3.68	2.92	1.69	1.77	0.61	0.73	1.4	1.09	1.6	1.72	4.45	5.48	9.99	10.22
Solyc01g008920	5.2	5.2	13.84	13.81	43.46	40.88	0.43	0.43	2.82	2.27	3.65	2.82	3.5	4	4.61	3.8	3.5	2.55	2.39	1.44
Solyc01g008930	11.71	13.85	12.39	9.56	6.73	6.54	2.4	1.73	13	12.24	10.99	7.04	6.81	6.09	6.24	6.14	3.43	3.18	2.81	1.74
Solyc01g008940	3.41	3.03	0.79	1.36	14.96	12.35	1.37	1.36	0.32	0	0	0	0	0	0	0	0	0	0	0
Solyc01g008950	272.18	278.63	270.38	262.09	133.26	136.17	259.54	253.41	302.08	282.52	201.83	187.15	230.23	226.97	221.82	214.96	220.61	218.96	138.52	144.85
Solyc01g008960	121.96	120.18	98.81	101.85	50.34	48.7	154.85	146.74	171.77	164.53	212.11	183.27	239.6	227.82	151.98	145.34	108.83	108.22	56.95	57.94
Solyc01g008970	132.88	126.98	174.04	172.31	136.7	131.41	207.68	207.46	218.04	207.27	224.51	203.81	352.74	331.2	219.88	227.61	241.64	241.99	118.22	114
Solyc01g008980	8.87	8.75	8.48	8.09	6.11	6.83	7.99	6.08	7.61	6.38	6.44	5.3	8.72	9.27	9.44	9.67	11.35	11.87	13.25	12.01
Solyc01g008990	20.08	20.63	17.51	17.82	11.77	10.02	14.61	13.97	21.94	21.52	19.45	12.55	18.16	20.13	14.55	15.69	13.76	11.38	15.89	14.55
Solyc01g009000	20.2	21.65	25.2	23.4	22.53	21.32	34.64	32.67	36.71	35.59	37.13	33.38	55.98	53.81	35.27	34.9	31.1	26.67	24.81	21.81
Solyc01g009010	48.56	49.31	42.37	35.57	26.71	24.39	7.27	7.5	40.28	39.9	26.11	21.69	20.49	19.68	16.31	16.7	35.73	39.18	55.76	53.11
Solyc01g009020	159.82	158.56	170.92	174.74	115.97	104.43	114.7	92.56	155.37	157.5	138.21	113.05	159.6	159.31	169.72	180.4	163.84	162.57	75.17	72
Solyc01g009030	6.44	7.17	4.8	4.62	4.34	3.89	19.32	16.89	13.91	12.24	15.52	12.9	14.6	13.16	14.64	15.12	15.04	13.02	19.77	19.56
Solyc01g009040	4.51	4.76	1.14	0.7	1.39	1.13	10.12	8.29	6.59	6.2	1.25	0.72	0.73	0.62	0.15	0.19	0	0	0	0
Solyc01g009050	20.3	18.91	22.62	20.5	21.79	20.67	25.49	24.85	22.14	23.42	22.13	20.13	27.06	25.8	25.56	23.7	26.4	24.91	44.68	43.64
Solyc01g009060	12.81	12.76	21.13	19.82	7.68	8.61	20.88	17.4	14.72	14.65	18.97	16.74	17.83	14.9	16.81	18.02	15.97	17.3	21.49	21.07
Solyc01g009070	20.77	17.96	18.56	14.73	5.4	4.89	9.35	8.82	4.6	5	8.96	6.74	9.27	10.43	8.15	8.5	5.95	5.51	3.89	4.18
Solyc01g009080	95.19	95.41	71.65	65.41	190.24	195.83	0	0.14	28.08	28.8	23.34	22.8	8.53	7.61	14.22	14.17	19.77	18.05	1.81	1.55
Solyc01g009090	25.6	23.51	33.52	31.56	18.61	17.57	31.93	35.29	35.56	33.65	27.47	25.73	46.71	44.17	36.05	35.21	35.63	34.91	38.08	39.4
Solyc01g009100	92.5	84.98	69.94	64.49	47.47	44.57	94.47	90.06	179.36	171.65	177.11	148.1	79.01	81.33	81.19	81.39	56.54	59.68	70.17	70.35
Solyc01g009110	6.58	5.68	7.19	8.06	11.41	10.16	3.71	2.94	4.83	5.34	6.17	4.91	9.45	7.41	8.18	8.06	9.63	10.42	16.56	18.53
Solyc01g009120	3.99	4.6	5.23	5.54	11.37	11.72	4.32	3.85	3.38	4.33	4.57	6.44	8.41	9.5	6.34	10.13	7.25	10.11	15.55	13.54
Solyc01g009130	0	0	0	0	0	0	0	0	0	0	0	0	0	0	0	0	0	0	0	0
Solyc01g009140	0	0	0	0	0	0	0	0	0	0	0	0	0	0	0	0	0	0	0	0
Solyc01g009150	12.85	12.63	9.24	9.16	7.69	8.92	12.05	9.87	16.31	15.12	16.38	13.74	8.45	10.33	14.13	14.87	7.44	10.55	13.04	12.21
Solyc01g009160	1.63	1.06	1.81	1.51	13.71	15.25	26.64	25.98	9.67	9.28	3.27	3.39	0.68	0.86	32.59	29.54	9.83	10.93	10.56	9.05
Solyc01g009170	23.92	23.11	75.37	77.48	42.98	42.47	108.12	100.8	14.8	16.73	29.2	26.8	54.85	51.63	98.43	98.34	127.64	122.78	62.42	61.84
Solyc01g009180	12.05	11.77	16.8	16.95	10.53	11.17	18.08	17.17	14.88	13.05	18.23	14.98	11.39	9.95	15.94	17.03	20.83	22.22	28.64	28.49
Solyc01g009190	0.26	0.53	0.07	0	0	0.15	0.08	0.08	0	0	0	0	0.07	0	0	0	0	0	0	0
Solyc01g009200	2.74	3.89	1.85	1.8	2.8	3.37	6.79	6.99	1.84	2.23	1.8	1.04	2.53	2.45	0.82	0.45	0.19	0.1	0	0.08
Solyc01g009210	0.46	0	0	0	0	0	0	0	0	0	0	0	0	0	0	0	0	0	0	0
Solyc01g009220	1.36	1.61	0.49	0.88	2.61	1.21	1.51	0.5	1.16	1.62	0.18	0.93	0.96	0.48	0.16	0	0	0	0	0
Solyc01g009230	1.86	1.76	2.8	2.41	7.72	7.79	10.54	10.5	2.9	3.11	5.1	4.79	4.38	4.2	5.39	5.72	3.74	3.54	1.77	1.88
Solyc01g009240	65.35	68.99	15.47	14.57	0.22	0.22	0.09	0.28	0	0.05	0	0	0.13	0.09	0.06	0.2	0	0.09	0	0.04
Solyc01g009250	6.21	4.08	10.36	10.66	1.06	0.68	0.42	0.56	0.65	0.66	1.19	0.35	0.94	1.62	1.26	1.64	1.02	0.92	0.1	0.22
Solyc01g009260	0	0	0	0	0.55	1.18	0.36	0.65	0	0.08	0	0.09	0	0	0	0	0	0	0	0
Solyc01g009270	0	0.06	0	0.14	0.14	0.07	0	0.07	0	0	0	0	0	0	0	0	0	0	0	0
Solyc01g009280	11.78	12.64	14.62	14.47	11.72	11.75	18.59	18.63	12.91	11.3	12.2	11.83	14.28	13.4	17.63	18.6	14.47	14.61	16.29	17.53
Solyc01g009290	12.25	11.92	14.41	13.77	6.26	5.52	13.98	15.08	12.67	11.22	10.61	8.62	10.7	11.68	10.94	10.74	11.28	11.37	15.23	14.67
Solyc01g009300	7.6	7.04	12.18	11.62	7.28	6.9	57.97	58.69	13.39	13.79	39.51	33.87	53.57	50.75	36.25	34.83	15.1	14.54	12.05	11.77
Solyc01g009310	56.34	56.32	41.32	40.87	47.28	44.79	116.75	116.77	98.5	97.56	117.23	96.05	103.81	100.28	133.92	125.23	55.67	54.99	65.58	65
Solyc01g009320	0	0	0.24	0	0	0	0.16	0	0	0	0	0	0	0	0	0	0	0	0	0.06
Solyc01g009330	0	0.27	0.15	0.08	0.15	0.15	0.48	0.48	0	0	0	0	0	0	0	0	0	0	0	0
Solyc01g009340	2.68	2.04	1.09	1.05	1.13	1.01	0.97	0.9	2.68	2.81	0.63	1.29	0.64	0.94	0.87	0.32	0.2	0.21	0.06	0.06
Solyc01g009350	0.66	1.1	0	0	0	0	0	0.1	0	0	0	0	0	0	0	0	0	0	0	0
Solyc01g009360	0	0	0	0	0	0	0	0	0	0	0	0	0	0	0	0	0	0	0	0
Solyc01g009370	0.17	0.34	0.52	1.01	0	0	16.74	17.66	0	0	0	0.17	0	0.06	0.09	0	0	0	0	0
Solyc01g009380	5.99	6.37	5.57	5.31	10.78	7.79	11.7	11.06	7.69	8.7	7.57	7.01	7.42	7.93	8.55	8.13	7.63	7.18	8.7	9.82
Solyc01g009390	5.92	4.98	8.05	8.88	3.39	3.71	12.23	12.27	4.07	3.97	6.56	6.77	9.08	7.6	10.06	7.88	14.42	14.87	15.51	14.22
Solyc01g009400	0	0	0	0	0	0	4.67	5.36	0	0	0	0	0	0	0	0	0	0	0	0
Solyc01g009410	0	0	0	0	0	0	14.38	14.76	0	0	0	0	0	0	0	0	0	0	0	0
Solyc01g009420	109.43	99.15	70.17	72.64	80.51	79.41	137.85	136.79	252.11	242.48	347.16	297.74	343.35	323.81	316.76	315.69	255.12	260.26	158.81	154.69
Solyc01g009430	86.06	82.69	162.39	155.16	23.17	26.93	26.69	26.56	58.28	55.69	118.23	103.08	239.68	229.53	281.12	284.2	605.49	596	209.19	214.95
Solyc01g009440	0.81	0.83	0	0	0	0	0	0	0	0	0	0.2	0	0	0	0	0	0	0	0
Solyc01g009450	75.96	70.67	82.37	80.48	75.36	72.71	107.42	108.53	79.8	83.26	97.49	87.08	158.25	155.1	145.1	149.18	223.59	224.33	104.6	98.46
Solyc01g009460	0	0	0	0	0	0	0	0	0	0	0	0	0	0	0	0	0	0	0	0
Solyc01g009470	0	0.07	0	0	0	0	0.13	0.04	0	0	0	0	0	0	0	0	0	0	0	0
Solyc01g009480	5.06	4.06	17.36	19.78	0.36	0.3	1.54	1.69	0	0.09	0	0	0.07	0.07	0	0.24	0	0.07	0	0
Solyc01g009490	0	0	0	0	0	0	0	0	0	0	0	0	0	0	0	0	0	0	0	0
Solyc01g009500	6.83	7.37	9.13	7.47	9.63	11.3	12.98	11.41	4.99	4.46	4.01	3.33	3.46	3.66	6.71	5.54	2.68	3.51	3.11	3.68
Solyc01g009510	0	0	0	0	0	0	0	0	0	0	0	0	0	0	0	0	0	0	0	0
Solyc01g009520	99.37	93.5	65.19	69.09	58.51	58.14	116.25	103.62	231	223.57	157.87	142.44	188.7	178.62	166.01	162.09	112.47	114.32	92.03	89.2
Solyc01g009530	0	0	0	0	0	0	0.16	0	0	0	0	0	0	0.15	0	0	0	0	0	0
Solyc01g009540	0	0	0	0	0	0	0	0	0	0	0	0	0	0	0	0	0	0	0	0
Solyc01g009550	0	0	0	0	0	0	0	0	0	0.45	0	0.48	0.37	0.37	0	0.41	0	0	0.29	0
Solyc01g009560	0	0	0	0	0	0	0.97	0.78	0	0	0	0	0	0	0	0	0	0	0	0
Solyc01g009570	18.7	17.59	12.8	12.63	36.24	32.03	0	0	2.72	1.69	0.51	0.67	0.17	0	0	0.19	0	0	0	0
Solyc01g009580	0.51	0.52	0	0	0	0	2.45	2.6	0	0.18	0	0	0.15	0	0	0	0	0	0	0
Solyc01g009590	999.89	978.56	0	0	0	0	0	0	0	0	0	0	0	0	0.25	0	0.17	0	0	0
Solyc01g009600	17.17	15.31	13.08	12.78	0.05	0	0.05	0	0	0	0	0	0.09	0.09	0.06	0.1	0	0	0	0
Solyc01g009610	32.76	27.77	23.06	21.46	32.36	29.96	31.5	29.3	62.62	62.35	47.83	39.15	39.19	40.12	36.88	36.56	15.11	16.55	12.12	12.13
Solyc01g009620	16.58	18.85	14.35	11.5	9	9.57	15.66	11.84	36.78	39.27	30.46	26.39	28.12	25.04	22.96	22.09	22.48	18.53	34.5	34.8
Solyc01g009630	22.68	22.61	22.66	21.84	21.92	22.66	27.75	24.23	38.99	40.86	33.11	26.59	30.78	30.21	28.78	25.7	30.29	30.56	48.23	51.2
Solyc01g009640	0	0	0	0	0	0	0	0	0	0	0	0	0	0	0	0	0	0	0	0
Solyc01g009650	0	0	0	0	0	0.36	0.37	0.37	0	0	0	0	0	0	0	0	0	0	0	0
Solyc01g009660	0	0	0	0	0	0	0	0	0	0	0	0	0	0	0	0	0	0	0	0
Solyc01g009670	1.7	1.11	2.16	1.3	9.3	8.69	0.93	1.11	2.72	1.96	2.01	0.76	1.24	0.89	0.72	0.79	0.28	0.17	0.14	0.05
Solyc01g009680	32.5	33.24	11.18	12.22	65.84	62.83	0	0.07	1.42	1.69	1.32	1.68	0.69	0.28	0.09	0.38	2.02	2.23	6.57	6.61
Solyc01g009690	0.79	0.81	0.99	1.02	0.74	1.14	5.99	4.49	0	0	0.44	0.29	0.15	0.08	0.86	1	0.25	0.18	0.38	0.46
Solyc01g009700	0.51	0.39	0.24	0.5	0.95	0.73	0.86	1.31	0.06	0.06	0.07	0.06	0.1	0.15	0.52	0.32	0.23	0.05	0.41	0.16
Solyc01g009710	0	0	0	0	0	0	0	0	0	0	0	0	0	0	0	0	0	0	0	0
Solyc01g009720	0.42	0.26	0.39	0.2	0.76	0.97	3.33	3.83	0	0.47	0	0.12	0	0	0.13	0	0.09	0	0.07	0
Solyc01g009730	0.08	0.09	0	0	0	0	0	0	0	0	0	0	0	0	0	0	0	0	0	0
Solyc01g009740	0	0	0.05	0.11	0	0	0	0	0	0	0	0	0	0	0	0	0	0	0	0
Solyc01g009750	70.83	71.78	89.09	92.59	49.94	49	76.35	73.86	80.53	86.17	81.5	73.64	102.38	100.81	144.21	140.03	137.74	141.17	180.27	177.08
Solyc01g009760	1.89	1.56	2.61	3.98	2.96	2.7	6.48	7.55	0.87	0.63	0.46	0.8	0.21	0.21	1.66	1.83	1.07	1.52	0.48	0.75
Solyc01g009770	8.62	8.72	1.76	1.81	1.5	3.39	18.42	20.44	12.87	10.91	5.13	5.17	3.48	3.61	2.77	2.29	5.14	6.07	3.2	2.45
Solyc01g009780	30.3	35.52	49.18	51.53	21.9	22.2	29.01	32.95	28.42	27.74	20.89	19.95	26.46	23.38	43.52	43.49	30.93	32.71	62.97	62.84
Solyc01g009790	0	0	0	0	0	0	0	0	0	0	0	0	0	0	0	0	0	0	0	0
Solyc01g009800	0	0	0	0	0	0	0	0	0	0	0	0	0	0	0	0	0	0	0	0
Solyc01g009810	0	0.15	0	0.17	0.32	0.49	2.05	0.68	0.39	0	0.96	0.21	0	0	0.66	0.72	0	0	0.51	0.39
Solyc01g009820	6.28	5.93	23.16	20.81	6.28	6.82	13.51	12.12	5.1	5.06	9.06	6.79	9.38	8.58	15.51	16.72	14.68	15.2	17.58	17.55
Solyc01g009830	0.51	0.45	0.34	0.44	0	0.08	6.41	4.56	0	0	0.12	0	0.42	0.51	4.06	3.63	0.16	0.08	0	0.07
Solyc01g009840	0	0	0	0	0	0	0	0.41	0	0	0	0	0.13	0	0	0	0.12	0	0	0
Solyc01g009850	32.11	30.35	20.82	19.61	13.2	12.81	13.92	14.21	31.92	28.99	14.59	12.33	11.04	11.59	10.88	10.1	14.09	11.62	13.87	14.49
Solyc01g009860	23.55	23.84	115.49	114.2	122.79	119.34	89.36	96.17	30.8	30.18	29.8	27.41	18.48	17.36	16.55	16.28	29.68	34.27	3.09	3.05
Solyc01g009870	10.39	11.07	3.38	3.09	0.12	0	0.32	0.39	20.37	17.86	24.34	21.84	43.24	45.43	21.65	18.62	0.53	0.91	2.78	2.94
Solyc01g009880	2.19	1.79	0.69	0.57	0	0	0	0	0	0	0	0	0	0	0	0	0	0	0	0
Solyc01g009890	0.22	0.44	0.25	0	0	0.5	0	0	0	0	0	0	0	0	0	0	0	0	0	0
Solyc01g009900	1.09	1.11	5.27	5.42	0.21	0.84	0	0	0.5	0.25	0	0	0	0	0	0	0	0	0	0
Solyc01g009910	0	0.96	0.55	0	0	0	0	0	0	0	0	0	0	0	0	0	0	0	0	0
Solyc01g009920	0.7	0.56	0.04	0.04	0	0	0	0	0	0	0	0	0	0	0	0	0	0	0	0
Solyc01g009930	0	0	0.06	0.06	0.28	0.11	0.82	1.16	0	0.07	0.08	0.07	0	0.11	0.15	0.25	0.05	0	0	0
Solyc01g009940	0	0	0	0	0	0	0	0	0	0	0	0	0	0	0	0	0	0	0	0
Solyc01g009950	0	0	0	0	0	0.21	0.22	0	0	0	0	0	0	0	0	0	0	0	0	0
Solyc01g009960	0.8	0.24	0.74	0.57	0	0	0	0	0	0	0	0	0	0	0	0	0	0	0	0
Solyc01g009970	13.66	13.61	12.67	11.52	22.45	20.71	9.61	8.37	19.35	18.77	18.34	15.09	17.75	17.44	11.5	9.95	12.28	13.12	20.66	21.7
Solyc01g009980	0	0	0	0	0	0	0	0	0	0	0	0	0	0	0	0	0	0	0	0
Solyc01g009990	125.73	122.98	83.95	81.44	120.96	121.21	31.01	28.41	171.28	175.28	152.91	124.74	82.27	75.77	63.57	59.3	57.56	60.47	97.9	103.65
Solyc01g010000	12.33	10.18	14.93	14.88	12.54	12.6	18.32	16.84	6.37	5.89	5.05	4.92	6.2	5.6	5.06	5.59	9.05	8.35	7.82	8.41
Solyc01g010010	0.11	0.23	0	0	0	0.13	0.14	0.28	0	0	0	0	0.13	0	0	0	0	0	0	0
Solyc01g010020	11.29	11.39	3.71	3.62	6.49	6.71	18.56	17.46	2.84	2.41	2.22	1.93	1.31	1.32	4.54	5.41	2.93	2.12	0.95	0.83
Solyc01g010030	5.03	4.53	5.48	5.94	5.9	6.59	14.76	15.12	5.94	6.32	5.76	3.29	3.62	2.74	2.62	2.16	2.27	2.67	2.87	2.55
Solyc01g010040	0	0	0	0	0	0	0	0	0	0	0	0	0	0	0	0	0	0	0	0
Solyc01g010050	26.45	27.53	28.38	29.65	46.51	45.18	28.41	31.2	25.03	21.93	37.64	30.32	47.81	43.99	28.54	26.79	15.98	14.57	18.37	17.42
Solyc01g010060	1.7	1.49	1.41	0.73	1.52	1.68	2.77	2.04	3.54	2.9	2.06	1.43	1.39	0.7	7.12	11.28	6.33	5.74	39.03	37.2
Solyc01g010070	0	0	0	0	0	0	0	0	0	0	0	0	0	0	0	0	0	0	0	0
Solyc01g010080	0.12	0.12	0.09	0.05	0	0.18	57.3	55.19	0	0	0	0	0	0	0.06	0	0	0	0.04	0.04
Solyc01g010090	0	0	0	0	0	0	0	0	0	0	0	0	0	0.12	0	0	0	0	0	0
Solyc01g010100	0	0	0	0	0	0	0	0	0	0	0	0	0	0	0	0	0	0	0	0
Solyc01g010110	0	0	0	0	0	0	0	0	0	0	0	0	0	0	0.18	0.15	0	0	0.21	0
Solyc01g010120	0	0	0	0	0	0	0	0	0	0	0	0	0	0	0	0	0	0	0	0
Solyc01g010130	19.02	20.23	70.24	66.18	8.41	6.81	8.54	9.16	7.7	6.47	8.18	7.18	8.73	8.39	3.75	3.53	1.32	1.45	1.05	1.69
Solyc01g010140	0	0	0	0	0.07	0	0	0	0	0	0	0	0	0	0	0	0	0	0	0
Solyc01g010150	21.76	23.51	12.92	15.38	3.83	4.06	10.13	11.13	0.45	0.33	0.4	0.41	0.81	0.6	2.82	2.5	2.7	3	5.55	6.07
Solyc01g010160	0.38	0.59	0	0	0	0	0	0	0.27	0	0	0	0	0	0.29	0	2.08	2.58	33.87	31.84
Solyc01g010170	0	0	0	0	0	0	0	0	0	0	0	0	0	0	0	0	2.89	2	34.79	64.92
Solyc01g010180	18.72	17.66	22.81	18.82	63.58	61.3	5.64	4.08	73.58	69.58	64.78	49.36	48.54	42.57	29.34	32.05	2.99	3.28	3.6	2.25
Solyc01g010190	27.68	23.28	18.25	23.01	9.9	9.76	18.73	18.26	43.64	39.8	34.91	26.16	36.76	37.84	21.6	19.25	18.95	13.36	21.39	22.75
Solyc01g010200	111.92	109.86	94.89	89.32	23.1	18.9	50.6	45.73	269.54	265.05	261.6	225.52	259.77	248.8	205.41	196.66	92.05	92.11	51.66	52.8
Solyc01g010210	0	0	0	0.18	0	0	0	0	0	0	0	0	0	0	0	0.19	0	0	0.27	0.57
Solyc01g010220	10.35	11.43	8.34	8.71	4.65	6.39	9.35	8.72	20.17	18.14	14.92	11.94	9.4	10.76	8.68	7.82	4.11	4.49	4.1	5.21
Solyc01g010230	35.4	31.61	32.78	26.5	12.11	12.48	86.84	73.3	62.09	61.86	80.43	67.77	56.86	48.74	61.08	58.27	22.49	21.27	65.03	63.18
Solyc01g010240	1.52	1.24	0	0	0	0	0	0	0	0	0	0	0	0	0	0	0	0	0	0
Solyc01g010250	8.76	10.1	7.42	8.08	7.4	9	0	0	15.22	13.45	8.92	9.63	5.87	6.17	12.58	13.49	22.95	23.77	14.26	13.86
Solyc01g010260	0	0	0	0	0	0	0.11	0	0	0	0	0	0	0	0	0	0	0	0	0
Solyc01g010270	87.96	92.4	61.67	55.95	69.38	72.44	134.71	132.54	187.86	192.44	174.58	153.79	150.2	147.7	223.4	219.6	69.75	68.79	56.22	57.11
Solyc01g010280	1.81	1.44	2.26	2.57	0.15	0	0.08	0.08	0	0	0	0	0	0	0	0	0	0	0	0
Solyc01g010290	10.21	10.52	10.07	9.73	17.6	17.24	52.96	50.31	9.66	6.48	10.19	8.15	8.24	7.23	10.2	8.69	6.42	6.25	4.32	4.17
Solyc01g010300	0	0	0	0	0	0	0	0	0	0	0	0	0	0	0	0	0	0	0	0
Solyc01g010310	36.67	34.47	10.01	9.03	5.54	7.49	44.78	37.46	34.32	33.45	50.57	47.02	39.38	36.31	23.58	21.35	12.92	13.14	0.38	0.2
Solyc01g010320	0	0.15	0	0	0	0	0	0	0	0	0	0	0	0	0	0	0	0	0	0
Solyc01g010330	0	0	0	0	0	0	0	0	0	0	0	0	0	0	0	0	0	0	0	0
Solyc01g010340	0.36	0.06	0.41	0.5	0.2	0.27	0.57	0.14	0.25	0.5	0.1	0.26	0.14	0.48	0.09	0.08	0.13	0.27	0.21	0.44
Solyc01g010350	3.81	2.76	0	0.07	0	0	12.82	13.54	0	0	0	0	0.07	0.14	0.19	0.08	0.2	0	0	0
Solyc01g010360	55.87	61.3	5.31	4.44	0	0	0	0	0	0.12	0	0.13	0.79	0.5	0.8	0.77	0.09	0.1	0.08	0.08
Solyc01g010370	8.05	6.47	1.95	2.29	3.9	3.7	4.41	5.34	3.46	4.67	2.91	2.36	2.2	2.25	1.75	2.19	0.97	0.97	0.28	0.51
Solyc01g010380	0	1.16	0	1.36	0	0	0	0	0	0	0	0	0	0	0	0	0	0	0	0
Solyc01g010390	66.1	61.79	4.16	4.16	8.34	6.93	19.91	16.92	9.43	8.92	8.79	8.03	10.76	8.32	4.58	3.53	0.77	1.19	1.12	1.35
Solyc01g010400	0	0	0	0	0	0	0	0	0	0	0	0	0	0	0	0	0	0	0	0
Solyc01g010410	0.51	0.48	0.29	0.22	0	0	0	0	0.25	0.36	0.49	0.64	0.91	0.58	2	1.84	2.75	3.33	0.51	0.8
Solyc01g010420	0.35	0.24	0.13	0.28	0	0	0.97	0.97	0	0	0	0	0	0	0	0.15	0	0	0	0.11
Solyc01g010430	26.33	29.91	11.88	10.85	4.6	6.17	18.04	18.34	4.88	4.18	7.11	6.49	3.8	3.75	23.98	28.31	24.53	23.28	28.47	29.4
Solyc01g010440	23.55	23.29	26.21	25.11	17.61	17.88	39.7	37.45	43.62	40.42	38.71	34.32	67.11	67.79	44.11	42.99	39.87	39.44	29.3	27.73
Solyc01g010450	0	0	0	0	0	0	0	0	0	0	0	0	0	0	0	0	0	0	0	0
Solyc01g010460	1.32	2.33	1.46	1.72	4.83	4.71	1.51	1.65	3.49	3.12	2.84	2.83	4.95	3.32	3.05	3.36	1.37	1.28	1.81	2.83
Solyc01g010470	3.87	5.44	4.61	4.51	10.96	12.05	3.71	3.94	5.49	5.43	4.91	4.56	6.65	6.92	9.08	6.02	3.78	3.91	4.9	5.27
Solyc01g010480	11.41	10.87	18.62	19.54	173.59	177.33	1.86	1.8	0.38	0.32	1.31	1.41	6.49	6.37	35.28	32.65	81.78	87.21	21.54	21.97
Solyc01g010490	0	0	0	0	0	0	0.17	0.11	0	0	0	0	0.16	0.05	3.71	4.24	18.82	16.88	25.56	23.48
Solyc01g010500	18.09	17.67	0.16	0.16	0.31	0.08	0	0	0	0	0	0	0	0	0.1	0.09	0	0	0	0
Solyc01g010510	1	1.36	0.83	0.97	1.4	1.59	1.42	1.36	0.59	0.8	0.96	0.7	0.65	0.77	0.73	0.78	0.41	0.85	0.89	0.92
Solyc01g010520	16.42	17.13	19.24	20.03	21.43	21.97	1.3	2.21	19.23	19.49	17.57	12.76	15.63	13.44	8.14	7.85	0.69	0.93	0.11	0.12
Solyc01g010530	0.93	1.19	0	0	0	0	0	0	0	0.08	0	0	0	0	0	0	0	0	0	0
Solyc01g010540	219.96	211.96	181.13	177.35	102.32	94.07	219.42	202.25	423.13	416.47	295.91	252.69	366.06	350.09	261.23	259.46	219.8	224.05	168.54	172.19
Solyc01g010550	0	0	0	0	0	0	0	0	0	0	0	0	0	0	0	0	0	0	0	0
Solyc01g010570	12.48	11.71	13.68	13.54	8.28	8.96	10.56	10.7	15.68	17.17	21.13	16.11	33.75	34.18	28.19	31.9	26.24	24.71	15.99	14.58
Solyc01g010580	216.43	205.31	201.23	197.72	103.35	101.55	278.04	259.12	475.94	467.1	384.09	345.79	558.56	538.61	352.28	348.99	290.21	300	184.67	190.3
Solyc01g010590	20.82	20.28	14.37	16.58	12.22	12.26	35.35	35	29.77	33.21	22.47	18.47	22.65	21.92	22.36	21.3	15.57	13.61	17.11	17.1
Solyc01g010600	5	5.21	4.5	3.84	0	0.11	0.11	0.23	0	0	0	0	0	0	0	0	0	0	0	0
Solyc01g010610	0	0	0	0	0	0	0	0	0	0	0	0	0	0	0	0	0	0	0	0
Solyc01g010630	0	0.07	0	0	0	0	0	0	0	0	0	0	0	0	0	0	0	0	0.06	0.06
Solyc01g010640	14.69	13.56	31.14	30.33	56.34	51.6	4.19	4.83	9.19	7.55	16.53	14.26	17.57	15.4	18.63	18.45	34.02	30.7	74.15	69.95
Solyc01g010650	45.14	45.38	31.09	27.33	8.36	7.89	18.92	19.54	22.43	20.46	21.41	18.03	41.39	38.53	35.64	33.23	34.28	36.44	20.52	18.39
Solyc01g010660	8.08	9.22	10.05	10.34	4.74	3.65	7.19	6.63	12.04	14.75	10.38	7.4	8.58	8.58	15.25	15.24	9.58	8.88	25.99	27.78
Solyc01g010670	0	0.28	0	0	0	0	0	0	0	0	0	0	0	0.64	0	0	0	0	0	0
Solyc01g010680	0	0	0	0	0	0	0	0	0	0	0	0	0	0.11	0	0	0	0	0	0
Solyc01g010690	0	0	0	0	0	0	0	0	0	0	0	0	0	0	0	0	0	0	0	0
Solyc01g010700	11.7	11.67	12	11.93	7.03	8.02	1.9	2.2	15.95	14.91	21.24	19.82	26.74	24.96	15.13	13.68	13.02	13.99	19.67	18.88
Solyc01g010710	1.67	1.96	0.28	0.69	3.9	3.26	31.62	29.75	1.39	0.94	0.81	1.27	0.88	1.05	2.36	2.25	0.16	0.05	0	0
Solyc01g010720	0	0	0	0	0	0	10.19	10.25	0	0	0	0	0	0	0	0	0	0	0	0
Solyc01g010730	0	0	0	0	0	0	2.57	2.93	0	0	0	0	0	0	0	0	0	0	0	0
Solyc01g010740	12.14	12.67	3.98	2.64	0	0	0	0	0.07	0	0	0	0.06	0.06	0	0	0	0	0	0
Solyc01g010750	152.14	138.46	245.93	247.33	84.23	78.09	302.69	309.45	225.47	220.94	330.61	292.67	436.75	412.29	321.25	317.48	368.26	373.59	339.96	348.8
Solyc01g010760	125.92	116.45	95.99	91.51	31.66	30.43	89.83	86.76	65.68	60.63	38.73	39.67	41.52	42.01	32.61	32.99	74.91	79.66	100.68	100.72
Solyc01g010770	0.68	0.61	2.08	2.85	10.5	9.13	3.47	4.18	0.94	0.48	2.73	1.63	8.97	5.4	4.71	5.62	3.23	2.87	0.23	0.24
Solyc01g010780	20.89	23.16	26.2	24.32	20.19	19.73	29.45	29.22	26.18	26.18	24.77	20.74	25.85	24.7	21.19	20.82	19.83	21.57	21.09	20.68
Solyc01g010790	0	0.25	0	0	0	0	0	0	0	0	0	0	0	0	0	0	0.09	0	0	0
Solyc01g010800	2.67	0.91	2.07	1.06	0	1.03	2.13	0	0	0	3.01	1.31	3.06	3.08	5.48	3.39	6.75	1	0.79	0.82
Solyc01g010810	7.1	8.04	7.96	9.1	9.48	9.17	9.64	9.93	11.83	12.59	11.59	10.47	9.99	9.95	14.71	14.51	10.45	10.07	13.45	15.31
Solyc01g010820	7.6	6.42	12.34	12.17	5.87	6.02	14.09	15.5	8.74	7.1	15.41	14.49	12.46	10.94	14.17	11.53	14.17	15.38	12.26	11.26
Solyc01g010830	13.24	13	10.58	9.9	10.83	10.24	9.3	9.56	14.9	14.58	14.39	14.53	12.51	13.63	17.84	16.16	20.97	21.05	18.46	20.36
Solyc01g010840	0	0	0	0	0	0	0	0	0	0	0	0	0	0	0	0	0	0	0	0
Solyc01g010850	0	0	0	0	0	0	0	0	0	0	0	0	0	0	0	0	0	0	0	0
Solyc01g010860	9.19	10.62	20.51	19.07	10.35	9.56	14.36	13.87	7.15	5.5	10.27	8.28	13.34	11.91	8.74	9.73	9.42	10.13	11.25	11.95
Solyc01g010870	12.73	11.86	15.73	13.91	11.88	12.22	25.7	25	16.73	15.65	23.09	18.57	25.71	24.43	37.84	36.57	78.61	78.5	90.69	92.8
Solyc01g010880	36.4	34.95	78.96	76.2	7.25	7.94	11.38	10.71	6.86	7.12	8.07	5.16	7.27	8.78	5.3	6.83	4.85	4.55	5.74	6.25
Solyc01g010890	3.58	3.67	3.15	3.53	0	0	0.19	0	0.11	0	0	0	0	0	0	0	0	0	0	0
Solyc01g010900	22.81	22.16	0	0	0	0	0.06	0	0	0	0	0	0.06	0	0	0	0	0	0	0
Solyc01g010910	1.44	1.48	0.2	0.61	1.44	0.59	0.2	0	0	0.12	0	0	0.1	0	0	0	0	0	0	0
Solyc01g010920	2.66	3.57	1.16	1.19	1.32	1.54	3.59	4.39	1.61	1.17	1.69	0.25	0.76	1.73	1.03	2.12	1.08	1.31	0.3	0.62
Solyc01g010930	1.99	2.34	0.46	0.59	1.46	1.49	2.98	3.21	0.96	1.95	1.34	1.02	1.25	1.26	2.14	1.26	0.54	0.56	0.53	0.28
Solyc01g010940	37.06	36.97	35.44	35.06	26.99	26.8	40.23	37.95	27.38	23.37	23.87	19.3	11.04	9.94	19.51	19.54	20.7	20.31	41.67	38.31
Solyc01g010950	32.87	33.62	37.33	39.13	12.11	11.52	3.73	2.81	12.54	11.87	10.7	8.6	11.13	13.71	11.75	13.24	13.96	12.31	15.8	15.36
Solyc01g010960	18.78	16.39	12.21	20.16	6.89	9.25	19.23	18.21	50.53	50.84	23.38	15.89	23.13	26.14	16.17	24.58	13.49	12.73	9.83	13.28
Solyc01g010970	0.97	1.02	1.91	1.93	0.27	0.34	1.71	1.97	0.07	0.11	0.09	0.16	0	0.03	0.5	0.31	0.55	0.63	0.57	0.7
Solyc01g010980	17.88	23.28	31.19	35.99	23.96	17.83	2.93	0.97	18.03	20.56	31.66	29.97	37.3	36.59	20.04	18.6	6.17	6.4	0	0.75
Solyc01g010990	3.74	3.94	2.33	2.27	3.16	3.09	7.49	6.35	5.49	3.92	8.21	5.43	6.08	4.95	8.93	7.37	6.96	7.58	6.59	7.88
Solyc01g011000	242.02	245.47	338.38	316.05	197.75	190.81	306.23	306.04	297.35	284.07	245.08	199.77	203.56	198.76	254.02	251.82	289.14	278.84	254.55	258.04
Solyc01g011010	4.41	5.74	6.06	5.27	5.45	3.93	6.25	10.33	3.61	2.25	1.36	3.84	2.07	3.93	4.63	8.41	3.48	5.4	7.66	8.15
Solyc01g011020	0	0	0	0.64	0	0	0	0.64	0	0	0	0	0	0	0	0	0	0	0	0.5
Solyc01g011030	23.79	23.06	22.93	22.94	7.74	5.89	9.1	9.83	17.77	15.69	18.79	16.37	32.11	29.76	27.93	25.95	26.18	25.8	16.74	17.14
Solyc01g011040	61.58	60	32.46	34.66	29.77	26.63	44.5	44.38	80.37	82.48	69.13	56.14	33.29	31.27	51.51	50.79	35.44	33.73	38.42	33.81
Solyc01g011050	459.76	433.35	694.47	664.31	0.41	0.21	1.29	1	0.41	0.59	0.41	0.62	2.33	2.35	0.92	0.91	0.52	0.27	0	0
Solyc01g011060	0	0	0	0	0	0	0.38	0	0	0	0	0	0	0	0	0	0	0	0	0
Solyc01g011070	0	0	0	0	0	0	0	0	0	0	0	0	0	0	0	0	0	0	0	0
Solyc01g011080	0	0	0	0	0	0	0	0.19	0	0.22	0	0.23	0	0.18	0	0	0	0	0	0
Solyc01g011090	1.14	1.01	1.25	0.88	2.25	2.44	2.64	3.5	1.9	1.83	3.19	1.92	3.17	2.62	3.61	3.92	3.46	2.53	3.13	3.43
Solyc01g011100	12.59	11.43	14.01	13.56	22.05	21.71	27.82	26.52	19.48	19.02	18.01	16.71	18.01	17.56	26.4	25.55	24.03	23.97	23.54	22.73
Solyc01g011110	0	0	0	0	0	0	0	0	0	0	0	0	0	0	0	0	0	0	0	0
Solyc01g011130	0	0	0	0	0	0	0	0	0	0	0	0	0.05	0	0	0	0	0	0	0
Solyc01g011150	0	0	0	0	0	0	0	0	0	0	0	0	0	0	0	0	0	0	0	0
Solyc01g011170	0	0	0	0	0	0	0	0	0	0	0	0	0	0	0	0	0	0	0	0
Solyc01g011180	3.11	6.37	4.14	3.19	1.51	3.59	5.34	4.26	4.31	5.62	5.27	3.28	12.24	13.85	12.33	11.3	5.79	9.49	6.72	5.34
Solyc01g011190	0	1.36	1.55	0.53	0	0.51	1.07	1.07	1.23	0	0.75	0	1.53	1.54	2.05	1.13	1.45	1	1.58	1.64
Solyc01g011200	0.35	0.83	0.4	0.28	0.66	0.94	0.42	0.14	0.64	0.81	1.57	0.86	0.93	1.07	0.71	0.59	0.63	0.52	1.24	1.29
Solyc01g011220	0.39	0.79	0.6	0.62	0.44	0.74	0.31	0.77	0.36	0.36	0.44	0.57	1.62	1.04	0.2	0.82	0.42	0.72	1.72	0.48
Solyc01g011230	0.29	0.59	0.68	1.04	0.33	1.34	0	0.35	0	0	2.95	1.28	2	1.34	0.45	0.74	0.32	0.98	0.26	0.8
Solyc01g011240	0	0	0	0	0	0	0	0	0	0	0	0	0	0	0	0	0	0	0	0
Solyc01g011250	0	0	0	0	0	0	0	0	0	0	0	0	0	0	0	0	0	0	0	0
Solyc01g011260	0	0	0	0	0	0	0	0	0	0	0	0	0	0	0	0	0	0	0	0
Solyc01g011270	0.25	0	0	0.3	0.29	0	0	0	0.35	0	0	0.74	0.29	0.29	0.39	0.32	0.27	0.28	0	0.23
Solyc01g011280	0	0	0	0	0	0	0	0	0	0	0	0	0	0	0	0	0	0	0	0
Solyc01g011290	0	0	0	0	0	0	0	0	0	0	0	0	0	0	0	0	0	0	0	0
Solyc01g011300	0	0	0	0	0	0	0	0	0	0	0	0	0	0	0	0	0	0	0	0
Solyc01g011310	0.1	0	0.12	0	0	0	0	0	0	0	0	0	0	0	0	0	0.11	0	0	0
Solyc01g011320	0.2	0.2	0.23	0	0	0	0	0	0	0	0	0	0	0	0	0	0.22	0	0	0
Solyc01g011330	0	0	0	0	0	0	0	0	0	0.22	0	0	0	0	0	0	0	0.18	0.14	0
Solyc01g011340	42.6	36.52	35.82	35.5	32.15	33.81	49.56	41.81	40.96	43.43	36.89	33.01	21	20.25	38.67	38.34	36.26	33.16	31.12	33.89
Solyc01g011350	26.15	24.82	17.19	16.81	23.62	27.52	41.75	37.85	189.18	173.67	200.11	177.85	332.37	323.11	121.52	119.49	82.28	82.39	77.03	78.5
Solyc01g011370	0.26	0	0	0	0	0	0	0.32	0	0	0	0	0	0	0	0	0	0	0.23	0.24
Solyc01g011390	13.22	16.51	35.9	33.32	0	0	0	0	0	0.14	0	0	0.12	0.23	0	0	0	0.11	0	0
Solyc01g011400	0	0	0	0	0	0	0	0	0	0	0	0	0	0	0	0	0	0	0	0
Solyc01g011410	1.15	0.39	1.34	0	2.18	0.89	0.46	0.46	1.07	1.08	3.91	3.97	2.65	0.89	0.59	1.47	1.25	0.43	3.08	1.42
Solyc01g011420	0	0	0	0	0	0	0	0	0	0	0	0	2.72	1.37	1.83	1.51	0	2.66	2.11	0
Solyc01g011430	0.24	0.45	0.23	0.12	0.11	0.06	6.33	7.85	0	0	0	0.07	0	0.06	0	0	0	0	0	0
Solyc01g011450	0	0	0	0	0.22	0.22	0	0	0	0	0	0	0	0	0	0	0	0	0	0
Solyc01g011460	0	0	0	0	0	0.22	0	0	0	0	0	0	0	0	0	0	0	0	0	0
Solyc01g011470	0	0	0	0	0	0	0	0	0	0	0	0	0	0	0	0	0	0	0	0
Solyc01g011480	0	0	0	0	0	0	0	0	0	0	0	0	0	0	0	0	0	0	0	0
Solyc01g011490	0.4	0.61	0.23	0	0.22	0	0	0	0	0	0	0	0	0	0	0	0	0	0	0
Solyc01g011500	0	0	0	0	0	0	0	0	0	0	0	0	0	0	0	0	0	0	0	0.4
Solyc01g011510	60.45	58.21	72.75	67.29	43.39	42.59	5.8	5.55	17.4	18.65	15.51	13.2	6.96	6.41	13.55	13.28	11.5	13.53	17.2	16.17
Solyc01g011520	0	0	0	0	0	0	0	0	0	0	0	0	0	0	0	0	0	0	0	0
Solyc01g011530	0	0	0	0	0	0	0	0	0	0	0	0	0	0	0	0	0	0	0	0
Solyc01g011540	0	0	0	0	0	0	0	0	0	0	0	0	0	0	0	0	0	0	0	0
Solyc01g012540	0	0	0	0	0	0	0	0	0	0	0	0	0	0	0	0	0	0	0	0
Solyc01g012550	0	0	0	0	0	0	0	0	0	0	0	0	0	0	0	0	0	0	0	0
Solyc01g012560	0	0	0	0	0	0	0	0	0	0	0	0	0	0	0	0	0	0	0	0
Solyc01g012570	0	0	0	0	0	0	0	0	0	0	0	0	0	0	0	0	0	0	0	0
Solyc01g012580	0.33	0.34	0.39	0.8	0	1.55	1.21	0.8	0	0	1.13	0	0.77	0	1.55	1.7	3.27	1.88	3.27	2.47
Solyc01g012590	0	0	0	0	0	0	0	0	0	0	0	0	0	0	0	0	0	0	0	0
Solyc01g012600	0	0	0	0	0	0	0	0	0	0	0	0	0	0	0	0	0	0	0	0
Solyc01g012610	0	0	0	0	0	0	0	0	0	0	0	0	0	0	0	0	0	0	0	0
Solyc01g012620	0	0	0	0.27	0	0	0	0	0	0	0	0	0	0	0	0.29	0	0.26	0.4	0.42
Solyc01g012630	0	0	0	0	0	0	0	0	0	0	0	0	0	0	0	0	0	0	0	0
Solyc01g012640	0	0	0	0	0	0	0	0	0	0	0	0	0	0	0	0	0	0	0	0
Solyc01g012650	0.21	0	0	0.51	0	0.25	0	0	0	0	0	0	0	0	0.65	0	0.23	0	0.94	0
Solyc01g012660	0	0	0	0	0	0	0	0	0	0	0	0	0	0	0	0	0	0	0	0
Solyc01g012670	0	0	0	0	0	0	0	0	0	0	0	0	0	0	0	0	0	0	0	0
Solyc01g012680	0	0	0	0	0	0	0	0	0	0	0	0	0	0	0	0	0	0	0	0
Solyc01g012690	0	0	0	0	0	0	0	0	0	0	0	0	0	0	0	0	0	0	0	0
Solyc01g012700	10.22	10.12	13.53	9.63	5.67	6.03	0.52	0.39	2.41	2.75	2.21	0.96	0.75	0.5	2.34	2.07	1.3	1.71	2.8	2.51
Solyc01g012710	0	0	0	0	0	0	0	0	0	0	0	0	0	0	0	0	0	0	0	0
Solyc01g012720	0	0	0	0	0	0	0	0	0	0	0	0	0	0	0	0	0	0	0	0
Solyc01g012730	0	0	0	0	0	0	0	0	0	0	0	0	0	0	0	0	0	0	0	0
Solyc01g012740	0	0	0	0	0	0	0	0	0	0	0	0	0	0	0	0	0	0	0	0
Solyc01g012750	26.86	27.2	27.83	29.91	23.81	22.1	2.87	2.87	9.21	8.59	2.7	6.27	2.75	3.07	6.55	5.41	5.48	6.57	8.99	6.14
Solyc01g012760	11.49	9.24	10.97	4.91	5.74	8.69	0.99	0.66	0.95	2.5	1.16	1.41	0.31	0	0.84	1.57	1.63	1.38	2.55	1.39
Solyc01g013760	0	0	0	0	0	0	0	0	0	0	0	0	0	0	0	0	0	0	0	0
Solyc01g013770	0	0	0	0	0	0	0	0	0	0	0	0	0	0	0	0	0	0	0	0
Solyc01g013780	0	0	0	0	0	0	0	0	0	0	0	0	0	0	0	0	0	0	0	0
Solyc01g013790	0	0	0	0	0	0	0	0	0	0	0	0	0	0	0	0	0	0	0	0
Solyc01g013800	0	0	0	0	0	0	0	0	0	0	0	0	0	0	0	0	0	0	0	0
Solyc01g013810	0	0	0	0	0	0	0	0	0	0	0	0	0	0	0	0	0	0	0	0
Solyc01g013820	0	0	0	0	0	0	0	0	0	0	0	0	0	0	0	0	0	0	0	0
Solyc01g013830	0	0	0	0	0	0	0	0	0	0	0	0	0	0	0	0	0	0	0	0
Solyc01g013840	0	0	0	0	0	0	0	0	0	0	0	0	0	0	0	0	0	0	0	0
Solyc01g013850	0	0	0	0	0	0	0	0	0	0	0	0	0	0	0	0	0	0	0	0
Solyc01g013860	0	0	0	0	0	0	0	0	0	0	0	0	0	0	0	0	0	0	0	0
Solyc01g013870	0	0	0	0	0	0	0	0	0	0	0	0	0	0	0	0	0	0	0	0
Solyc01g013880	0	0	0	0	0	0	0	0	0	0	0	0	0	0	0	0	0	0	0	0
Solyc01g013890	15.66	15.08	18.33	18.74	13.92	12.76	1.6	1.72	4.96	4.31	2.43	3.62	1.64	2.01	4.41	2.99	3.55	4.03	5.1	4.26
Solyc01g013900	33.12	27.04	42.22	36.2	17.69	15.08	1.91	3.05	10.15	9.4	6.47	6.11	2.92	3.31	3.43	4.86	5.53	6.44	6.51	7.95
Solyc01g013910	0	0	0	0	0	0	0	0	0	0	0	0	0	0	0	0	0	0	0	0
Solyc01g013920	0	0	0	0	0	0	0	0	0	0	0	0	0	0	0	0	0	0	0	0
Solyc01g013930	0	0	0	0	0	0	0	0	0	0	0	0	0	0	0	0	0	0	0	0
Solyc01g013940	0	0	0	0	0	0	0	0	0	0	0	0	0	0	0	0	0	0	0	0
Solyc01g013950	0	0	0	0	0	0	0	0	0	0	0	0	0	0	0	0	0	0	0	0
Solyc01g013960	0	0	0	0	0	0	0	0	0	0	0	0	0	0	0	0	0	0	0	0
Solyc01g013970	0	0	0	0	0	0	0	0	0	0	0	0	0	0	0	0	0	0	0	0
Solyc01g013980	0	0	0	0	0	0	0	0	0	0	0	0	0	0	0	0	0	0	0	0
Solyc01g013990	0	0	0	0	0	0	0	0	0	0	0	0	0	0	0	0	0	0	0	0
Solyc01g014000	0	0	0	0	0	0	0	0	0	0	0	0	0	0	0	0	0	0	0	0
Solyc01g014010	0	0	0	0	0	0	0	0	0	0	0	0	0	0	0	0	0	0	0	0
Solyc01g014020	0	0	0	0	0	0	0	0	0	0	0	0	0	0	0	0	0	0	0	0
Solyc01g014030	0	0	0	0	0	0	0	0	0	0	0	0	0	0	0	0	0	0	0	0
Solyc01g014040	0	0	0	0	0	0	0	0	0	0	0	0	0	0	0	0	0	0	0	0
Solyc01g014050	0	0	0	0	0	0	0	0	0	0	0	0	0	0	0	0	0	0	0	0
Solyc01g014060	0	0	0	0	0	0	0	0	0	0	0	0	0	0	0	0	0	0	0	0
Solyc01g014070	0	0	0	0	0	0	0	0	0	0	0	0	0	0	0	0	0	0	0	0
Solyc01g014080	0	0	0	0	0	0	0	0	0	0	0	0	0	0	0	0	0	0	0	0
Solyc01g014090	0	0	0	0	0	0	0	0	0	0	0	0	0	0	0	0	0	0	0	0
Solyc01g014100	6.89	6.19	5.82	11.24	0	0	0.25	0	25.74	17.01	13.07	10.15	10.05	12.28	0.32	0	0	0	0	0
Solyc01g014110	1.4	1.67	2.72	1.4	1.86	2.16	5.61	5.33	1.62	0.99	3.17	3.79	0.8	0.81	1.8	0.89	0	0.26	0.21	0.43
Solyc01g014120	1.86	1.56	2.16	2.46	3.98	5.74	6.28	6.04	1.29	1.3	2.36	2.05	2.66	3.14	1.84	1.77	0.29	0.37	0.12	0.24
Solyc01g014130	0	0	0	0	0	0	0	0	0	0	0	0	0	0	0	0	0	0	0	0
Solyc01g014140	1.55	2.38	1.35	0.93	4.18	6.49	3.49	3.02	0.54	0.82	0	0.86	0.22	0.22	0	0	0	0	0	0
Solyc01g014150	0.13	0	0	0	0	0	0	0	0	0	0	0	0	0	0	0	0	0	0	0
Solyc01g014160	0	0	0	0	0	0	0	0	0	0	0	0	0	0	0	0	0	0	0	0
Solyc01g014170	0	0	0	0	0	0	0	0	0	0	0	0	0	0	0	0	0	0	0	0
Solyc01g014180	167.83	155.08	158.51	147.56	90.52	95.11	158.81	147.82	154.22	157.44	193.27	170.77	417.08	416.92	481.71	462.49	589.33	576.46	342.51	351.76
Solyc01g014190	0	0	0	0	0	0	0	0	0	0	0	0	0	0	0	0	0	0	0	0
Solyc01g014200	12.26	12.55	10.27	11.74	1.67	4.53	1.77	1.76	11.56	20.68	10.8	10.85	16.32	14.72	12.85	12.47	2.13	2.76	0	0.45
Solyc01g014210	0	0.1	0	0	0	0	0	0	0	0.13	0	0	0	0	0.15	0	0	0	0.08	0
Solyc01g014220	1.85	0.71	0.67	0.69	2.88	2.14	2.64	2.77	3.53	1.95	2.55	1.88	0.53	1.33	3.39	2.06	0.63	0.39	0.21	0.21
Solyc01g014230	3.43	3.64	8.78	7.76	4.24	4.43	13.78	13.95	5.06	5.17	7.51	6.49	9.28	9.04	11.92	10.92	9.52	9.33	11.14	10.29
Solyc01g014240	0	0	0	0	0	0	0	0	0	0	0	0	0	0	0	0	0	0	0	0
Solyc01g014250	7.42	6.81	8.09	7.61	2.92	4.89	2.72	2.18	3.36	4.89	8.71	10.27	18.92	16.24	15.85	17.51	38.26	40.31	32.97	24.76
Solyc01g014260	0	0	0	0	0	0	0	0	0	0	0	0	0	0	0	0	0	0	0	0
Solyc01g014270	10.58	11.42	11.09	14.05	15.29	16.65	0	0.28	13.22	15.19	27.56	29.66	41.62	39.06	25.44	22.03	15.02	14.51	16.44	15.37
Solyc01g014280	0	0	0	0	0	0	0	0.09	0	0	0	0.11	0	0.08	0	0	0	0	0	0
Solyc01g014290	0	0	0	0	0	0	0	0	0	0	0	0	0	0	0	0	0	0	0	0
Solyc01g014300	0	0	0	0	0	0	0	0	0	0	0	0	0	0	0	0	0	0	0	0
Solyc01g014310	0	0	0	0	0	0	0	0	0	0	0	0	0	0	0	0	0	0	0	0
Solyc01g014320	2.57	1.58	0.84	1.23	11.06	10.32	0	0	0	0	0	0	0	0	0	0	0	0.12	0	0
Solyc01g014330	1.1	0.32	0.37	0.19	4.1	3.81	0.19	0	0	0	0	0	0	0	0	0	0	0	0	0
Solyc01g014340	0	0	0	0	0	0	0	0.17	0	0	0	0	0	0	0	0	0	0	0.12	0
Solyc01g014350	0	0	0	0	0	0	0	0	0	0	0	0	0	0	0	0	0	0	0	0
Solyc01g014360	0	0	0	0	0	0	0	0	0	0	0	0	0	0	0	0	0	0	0	0
Solyc01g014370	0	0	0	0	0	0	0	0	0	0	0	0	0	0	0	0	0	0	0	0
Solyc01g014380	1.13	1.61	2.12	2.11	4.21	4.65	4.46	4.53	0.35	1.15	1.6	1.39	2.17	1.53	2.04	2.56	0.34	0.42	0.22	0
Solyc01g014390	0.42	0	0	0	0	0	0	0	0	0	0	0	0	0	0	0	0	0	0	0
Solyc01g014400	0	0	0	0	0	0	0	0	0	0	0	0	0	0	0	0	0	0	0	0
Solyc01g014410	0	0	0	0	0	0	0	0	0	0	0	0	0	0	0	0	0	0	0	0
Solyc01g014420	0	0	0	0	0	0	0	0	0	0	0	0	0	0	0	0	0	0	0	0
Solyc01g014430	0	0	0	0	0	0	0	0	0	0	0	0	0	0	0	0	0	0	0	0
Solyc01g014440	0	0	0	0	0	0	0	0	0	0	0	0	0	0	0	0	0	0	0	0
Solyc01g014450	0	0	0	0	0	0	0	0	0	0	0	0	0	0	0	0	0	0	0	0
Solyc01g014460	0	0	0	0	0	0	0	0	0	0	0	0	0	0	0	0	0	0	0	0
Solyc01g014470	0	0	0	0.24	0	0.23	0	0	0	0.28	0	0.29	0	0	0	0	0	0	0	0
Solyc01g014480	9.91	9.29	11.8	10.34	9.3	8.38	17.51	15.92	8.13	6.8	8.26	7.66	8.91	8.88	9.83	10.03	13.77	12.74	8.81	8.06
Solyc01g014490	8.54	8.24	7.21	7.02	8.24	7.75	11.54	10.5	11.73	11.11	11.44	10.45	11.37	11.09	13.26	13.45	9.75	8.84	11.42	11.59
Solyc01g014500	0	0	0	0	0	0	0	0	0	0	0	0	0	0	0	0	0	0	0	0
Solyc01g014510	0	0	0	0	0	0	0	0	0	0	0	0	0	0	0	0	0	0	0	0
Solyc01g014520	0	0	0	0	0	0	0	0	0	0	0	0	0	0	0	0	0	0	0	0
Solyc01g014530	0	0	0.4	0.31	0	0	0	0	0	0	0	0	0	0	0	0.11	0.47	0.49	0.77	0.8
Solyc01g014540	0	0	0	0	0	0	0	0	0	0	0	0	0	0	0	0	0	0	0	0
Solyc01g014550	0	0	0	0	0	0	0	0	0	0	0	0	0	0	0	0	0	0	0	0
Solyc01g014560	0	0	0	0.08	0.08	0.15	0	0	0	0	0	0	0	0	0.1	0.08	0.43	0.45	1.9	2.22
Solyc01g014570	0	0	0	0	0	0	0	0	0	0	0	0	0	0	0	0	0	0	0	0
Solyc01g014580	0	0	0	0	0	0	0	0	0	0	0	0	0	0	0	0	0	0	0	0
Solyc01g014600	0	0	0	0	0	0	0	0	0	0	0	0	0	0	0	0	0	0	0	0
Solyc01g014610	0	0	0	0	0	0	0	0.49	0	0	0	0	0	0	0	0	0	0	0	0
Solyc01g014620	2.73	3.03	0.53	3.27	2.58	1.31	2.73	5.73	0	0	0	0	0	0	0	0	0	0	0	0
Solyc01g014630	0	0	0	0	0	0	0	0	0	0	0	0	0	0	0	0	0	0	0	0
Solyc01g014640	0	0	0	0	0	0	0	0	0	0	0	0	0	0	0	0	0	0	0	0
Solyc01g014650	0	0	0	0	0	0	0	0	0	0	0	0	0	0	0	0	0	0	0	0
Solyc01g014660	0	0	0	0	0	0	0	0	0	0	0	0	0	0	0	0	0	0	0	0
Solyc01g014670	0	0	0	0	0	0	0	0	0	0	0	0	0	0	0	0	0	0	0	0
Solyc01g014680	0	0	0	0	0	0	0	0	0	0	0	0	0	0	0	0	0	0	0	0
Solyc01g014690	0	0	0	0	0	0	0	0	0	0	0	0	0	0	0	0	0	0	0	0
Solyc01g014700	0.08	0	0	0.09	0.18	0.63	0.37	0.09	0	0	0	0	0.27	0.18	0.72	0.59	0.76	0.61	0.21	0.14
Solyc01g014710	12	15.08	21.13	22.15	3.89	3.96	18.52	18.49	12.35	11.56	9.87	5.56	5.11	7.12	6.86	14.38	23.43	16.18	39.63	32.63
Solyc01g014720	0	0	0	0	0	0	0	0	0	0	0	0	0	0	0	0	0.18	0	0.14	0
Solyc01g014730	6.57	5.6	6.36	3.93	0	0	1.31	3.94	6.07	4.61	0	0	3.77	2.53	1.69	2.78	2.37	0	2.92	0
Solyc01g014740	0	0	0.37	0	0.36	0	0.38	0	0	0	0.54	0.47	0	0	0.49	0	0.35	1.08	0.28	0
Solyc01g014760	0	0	0	0	0	0	0	0	0	0	0	0	0	0	0	0	0	0	0	0
Solyc01g014770	0	0	0	0	0	0	0	0	0	0	0	0	0	0	0	0.27	0.46	0	0	0.39
Solyc01g014780	0	0	0	0	0	0	0	0	0	0	0	0	0	0	0	0	0	0	0	0
Solyc01g014790	0	0	0	0	0	0	0	0	0	0	0	0	0	0	0	0	0	0	0	0
Solyc01g014800	0	0	0	0	0	0	0	0	0	0	0	0	0	0	0	0	0	0	0	0
Solyc01g014820	0	0.12	0	0	0.41	0.28	0.29	0.29	0	0	0	0	0	0	0	0	0	0	0	0
Solyc01g014830	0	0	0	0	0	0	0	0	0	0	0	0	0	0	0	0	0	0	0	0
Solyc01g014840	0.15	0.23	0.22	0.32	0.12	0.1	6.82	6.48	0.2	0.32	0.32	0.31	0.14	0.1	0.74	0.77	0.07	0.05	0.65	0.35
Solyc01g014850	13.99	13.36	15.78	13.89	10.12	9.71	26.26	27.53	18.24	19.58	16.78	14.91	21.78	18.82	19.32	19.81	17.64	16.01	18.91	19.51
Solyc01g014860	3.4	8.23	7.55	5.55	6.31	7.85	17.82	15.2	7.29	13.9	12.57	14.14	17.03	13.92	10.48	13.37	11.75	11.12	12.93	15.72
Solyc01g014870	0	0	0	0	0	0	0	0	0	0	0	0	0	0	0	0	0	0	0	0
Solyc01g014880	5.15	4.19	2.92	3.64	0	0	0	0	0	0	0	0	0	0	0	0	0	0	0	0
Solyc01g014890	0	0	0	0	0	0	0	0	0	0	0	0	0	0	0	0	0	0	0	0
Solyc01g014900	0	0	0	0	0	0	0	0	0	0	0	0	0	0	0	0	0	0	0	0
Solyc01g014910	0	0	0	0	0	0	0	0	0	0	0	0	0	0	0	0	0	0	0	0.08
Solyc01g014920	0	0	0	0	0	0	0	0	0	0	0	0	0	0	0	0	0	0	0	0
Solyc01g014930	0	0	0	0	0	0	0	0	0	0	0	0	0	0	0	0	0	0	0	0
Solyc01g014940	0	0	0	0	0	0	0	0	0	0	0	0	0	0	0	0	0	0	0	0
Solyc01g014950	0	0	0	0	0	0	0	0	0.3	0	0	0	0	0	0	0	0	0.25	0	0
Solyc01g014960	0	0	0	0	0	0	0	0	0	0	0	0	0	0	0	0	0	0	0	0
Solyc01g014970	0	0	0	0	0	0	0	0	0	0	0	0	0	0	0	0	0	0	0	0
Solyc01g014980	0	0	0	0	0	0	0	0	0	0	0	0	0	0	0	0	0	0	0	0
Solyc01g014990	0	0	0	0	0	0	0	0	0	0	0	0	0	0	0	0	0	0	0	0
Solyc01g015000	40.29	41.01	27.36	25.06	20.01	19.69	12.69	10.52	32.34	24.66	51.83	45.14	45.41	45.69	18.74	21.04	31.16	31.49	28.82	32.07
Solyc01g015010	0.49	0	0	0	0	0	0	0	0	0.69	0	0	0	0	0	0	0	0	0	0
Solyc01g015020	31.42	32.01	51.89	52.92	25.46	30.07	57.65	54.8	25.62	21.68	33	29.58	34.79	36.97	40.46	37.84	55.39	55.5	43.06	42.82
Solyc01g015030	0	0	0	0	0	0	0	0	0	0	0	0	0	0	0	0	0	0	0	0
Solyc01g015040	0	0.5	1.14	1.17	1.11	0.57	4.12	3.53	0.68	0	2.49	3.62	10.13	6.79	8.31	6.86	8.52	7.17	6.54	5.89
Solyc01g015050	0.3	0.61	0.7	0.72	1.36	2.07	3.59	3.95	2.49	0.42	4.06	3.53	8.25	7.6	4.61	7.23	9.75	7.41	10.12	7.75
Solyc01g015060	0	0	0	0	0	0	0	0	0	0	0	0	0	0	0	0	0	0	0	0
Solyc01g015070	11.03	11.51	10	9.5	3.25	6.11	7.68	9.25	6.72	5.89	9.34	5.53	15.18	19.6	11.21	14.02	18.67	13.39	18.05	19.77
Solyc01g015080	0	0	0	0	0	0	303.67	291.44	0	0	0	0	0	0	0	0	0	0	0	0
Solyc01g015090	0	0	0	0	0	0	0	0	0	0	0	0	0	0	0	0	0	0	0	0
Solyc01g015100	0	0	0	0	0	0	0	0	0	0	0	0	0	0	0	0	0	0	0	0
Solyc01g015110	0.09	0.18	0.52	0.11	0	0	0.11	0	0	0	0	0	0.21	0.1	0.14	0.11	0.1	0	0.24	0
Solyc01g015120	0	0	0	0	0	0	0	0	0	0	0	0	0	0	0	0	0	0	0	0
Solyc01g015130	0	0	0	0	0	0	0	0	0	0	0	0	0	0	0	0	0	0	0	0
Solyc01g015140	0	0	0	0.77	0	0	0	0.39	0	0	0	0.48	0.74	0.37	0	0	0.35	0	0	0.6
Solyc01g015150	0	0	0	0	0	0	0	0	0	0	0	0	0	0	0	0	0	0	0	0
Solyc01g015160	0	0	0	0	0	0	0	0	0	0	0	0	0	0	0	0	0	0	0	0
Solyc01g015170	0	0	0	0	0	0	0	0	0	0	0	0	0	0	0	0	0	0	0	0
Solyc01g015180	0	0	0	0	0	0	0	0	0	0	0	0	0	0	0	0	0	0	0	0
Solyc01g015190	0	0	0	0	0	0	0	0	0	0	0	0	0	0	0	0	0	0	0	0
Solyc01g015200	0	0	0	0	0	0	0	0	0	0	0	0	0	0	0	0	0	0	0	0
Solyc01g015210	0	0	0	0	0	0	0	0	0	0	0	0	0	0	0	0	0	0	0	0
Solyc01g015220	0	0	0	0	0	0	0	0	0	0	0	0	0	0	0	0	0	0	0	0
Solyc01g015230	0	0	0	0	0	0	0	0	0	0	0	0	0	0	0	0	0	0	0	0
Solyc01g015240	0	0	0	0	0	0	0	0	0	0	0	0	0	0	0	0	0	0	0	0
Solyc01g015250	0	0	0	0	0	0	0	0	0	0	0	0	0	0	0	0	0	0	0	0
Solyc01g015260	0	0	0	0	0	0	0	0	0	0	0	0	0	0	0	0	0	0	0	0
Solyc01g015270	0	0	0	0	0	0	0	0	0	0	0	0	0	0	0	0	0	0	0	0
Solyc01g015280	0	0	0	0	0	0	0	0	0	0	0	0	0	0	0	0	0	0	0	0
Solyc01g015290	0	0	0	0	0	0	0	0	0	0	0	0	0	0	0	0	0	0	0	0
Solyc01g015300	0	0	0	0	0	0	0	0	0	0	0	0	0	0	0.77	0	0	0	0	0
Solyc01g016300	0	0	0	0	0	0	0	0	0	0	0	0	0	0	0	0	0	0	0	0
Solyc01g016310	0	0	0	0	0	0	0	0	0	0	0	0	0	0	0	0	0	0	0	0
Solyc01g016320	0	0	0	0	0	0	0	0	0	0	0	0	0	0	0	0	0	0	0	0
Solyc01g016330	0	0	0	0	0	0	0	0	0	0	0	0	0	0	0	0	0	0	0	0
Solyc01g016340	0	0	0	0	0	0	0	0	0	0	0	0	0	0	0	0	0	0	0	0
Solyc01g016350	0	0	0	0	0	0	0	0	0	0	0	0	0	0	0	0	0	0	0	0
Solyc01g016360	0.56	0.57	0.86	0.45	0.42	1.29	0.89	0.22	0	0	0	0	0	0	0	0.24	0.2	0	0	0
Solyc01g016370	0.53	0.38	0.33	0.24	0.32	0.71	0.88	0.78	0	0.06	0.07	0.06	0.05	0.05	0.25	0.47	0.13	0.09	0.36	0.26
Solyc01g016380	3.71	3.34	0.67	0.61	0.07	0	0	0.15	0.09	0	0	0	0	0	0	0	0	0	0	0
Solyc01g016390	1.88	2.71	0.34	0.17	0	0	0.12	0.06	0	0	0	0	0	0	0	0	0	0	0	0
Solyc01g016400	0.7	0	0.41	1.68	0.8	0.41	0	0.84	0	0	0	0.52	0	0	0.54	0.45	1.14	0.39	1.56	0.97
Solyc01g016410	6.05	5.2	6.12	4.83	3.88	3.44	8.74	7.36	8.87	8.63	6.53	7.76	10.67	10.73	16.35	18.07	25.03	26.03	24.34	24.48
Solyc01g016430	0	0	0	0	0	0	0	0	0	0	0	0	0	0	0	0	0	0	0	0
Solyc01g016450	0	0	0	0	0	0	0	0	0	0	0	0	0	0	0	0	0	0	0	0
Solyc01g016460	23.66	15.01	20.2	16.48	20.71	14.87	17.97	18.31	12.04	13.04	19.27	18.55	15.46	15.9	21.68	17.13	6.82	8.75	5.33	8.03
Solyc01g016470	41.86	42.82	37.86	33.69	17.81	19.88	60.81	64.94	80.49	77.36	69.38	57.65	32.88	34.1	44.73	42.99	32.6	33.06	38.23	40.08
Solyc01g016480	0.05	0	0	0	0	0	0	0	0	0	0	0	0	0	0	0	0	0	0	0.09
Solyc01g016510	0	0	0	0	0	0	0	0	0	0	0	0	0	0	0	0	0	0	0	0
Solyc01g016520	0	0	0	0	0	0	0	0	0	0	0	0	0	0	0	0	0	0	0	0.53
Solyc01g016530	0	0	0	0	0	0	0	0	0	0	0	0	0	0	0	0	0	0	0	0
Solyc01g016540	0.2	0	0.23	0	0.23	0.23	0	0	0	0	0	0	0	0	0	0	0	0	0	0
Solyc01g016550	0	0	0	0	0	0	0	0	0	0	0	0	0	0	0	0	0	0	0	0
Solyc01g016560	0	0.7	0	0	0	0.53	0	0	0	0	0	0	0	0.26	0	0	0	0.26	0	0
Solyc01g016570	1.35	0.46	0.7	0.9	0.68	1.39	1.99	2.17	1.46	1.06	3.57	2.66	2.76	2.43	2.78	2.3	1.96	0.85	1.87	1.53
Solyc01g016580	0	0	0	0	0	0	0	0	0	0	0	0	0	0	0	0	0	0	0	0
Solyc01g016590	0	0	0	0	0	0	0	0	0	0	0	0	0	0	0	0	0	0	0	0
Solyc01g016600	0	0	0	0	0	0	0	0	0	0	0	0	0	0	0	0	0	0	0	0
Solyc01g016610	0	0	0	0	0	0	0	0	0	0	0	0	0	0	0	0	0	0	0	0
Solyc01g016620	0	0	0	0	0	0	0	0	0	0	0	0	0	0	0	0	0	0	0	0
Solyc01g016630	0	0	0	0	0	0	0	0	0	0	0	0	0	0	0	0	0	0	0	0
Solyc01g016640	0	0	0	0	0	0	0	0	0	0	0	0	0	0	0	0	0	0	0	0
Solyc01g016650	0.33	0.33	0	0	0	0	0	0	0	0	0	0	0	0	0	0	0	0	0	0
Solyc01g016660	0	0	0	0	0	0	0	0	0	0	0	0	0	0	0	0	0	0	0	0
Solyc01g016670	0	0	0	0	0	0	0	0	0	0	0	0	0	0	0	0	0	0	0	0
Solyc01g016680	0	0	0	0	0	0	0	0	0	0	0	0	0	0	0	0	0	0	0	0
Solyc01g016690	0	0	0.34	0	0	0	0	0	0	0	0	0	0	0	0	0	0	0	0	0
Solyc01g016700	0.91	0	0	0	0	0	0	0	0	0	0.77	2.02	0	0	0.7	0	0	0.51	0.41	1.27
Solyc01g016710	0	0	0	0	0	0	0	0	0	0	0	0	0	0	0	0	0	0	0	0
Solyc01g016720	0.92	1.25	0.71	1.46	0	0	0	0	0.42	0	0	0.9	0	0	0.94	0	0	0	0.27	0
Solyc01g016730	0	0	0	0	0	0	0	0	0	0	0	0	0	0	0	0	0	0	0	0
Solyc01g016740	0	0	0	0	0	0	0	0	0	0	0	0	0	0	0	0	0	0	0	0
Solyc01g016750	0	0	0	0	0	0	0	0	0	0	0	0	0	0	0	0	0	0	0	0
Solyc01g016760	0	0	0	0	0	0	0	0	0	0	0	0	0	0	0	0	0	0	0	0
Solyc01g016770	0	0	0	0	0	0	0	0	0	0	0	0	0	0	0	0	0	0	0	0
Solyc01g016780	0	0	0	0	0	0	0	0	0	0	0	0	0	0	0	0	0	0	0	0
Solyc01g016790	0	0	0	0	0	0	0	0	0	0	0	0	0	0	0	0	0	0	0	0
Solyc01g016800	0	0	0	0	0	0	0	0	0	0	0	0	0	0	0	0	0	0	0	0
Solyc01g016810	0	0	0	0	0	0	0	0	0	0	0	0	0	0	0	0	0	0	0	0
Solyc01g016820	0.13	0	0	0	0	0	0	0	0	0	0	0	0	0	0	0	0	0	0	0
Solyc01g016830	0	0	0	0	0	0	0	0	0	0	0	0	0	0	0	0	0	0	0	0
Solyc01g016840	0	0	0	0	0	0	0	0	0	0	0	0	0	0	0	0	0	0	0	0
Solyc01g016850	0	0	0	0	0	0	0	0	0	0	0	0	0	0	0	0	0	0	0	0
Solyc01g016860	0	0	0	0	0	0	0	0	0	0	0	0	0	0	0	0	0	0	0	0
Solyc01g016870	0	0	0	0	0	0	0	0	0	0	0	0	0	0	0	0	0	0	0	0
Solyc01g016880	0	0	0	0	0	0	0	0	0	0	0	0	0	0	0	0	0	0	0	0
Solyc01g016890	0	0	0	0	0	0	0	0	0	0	0	0	0	0	0	0	0	0	0	0
Solyc01g016900	0	0	0	0	0	0	0	0	0	0	0	0	0	0	0	0	0	0	0	0
Solyc01g016910	0	0	0	0	0	0	0	0	0	0	0	0	0	0	0	0	0	0	0	0
Solyc01g016920	0	0	0	0	0	0	0	0	0	0	0	0	0	0	0	0	0	0	0	0
Solyc01g016930	0	0	0	0	0	0	0	0	0	0	0	0	0	0	0	0	0	0	0	0
Solyc01g016940	0	0	0	0	0	0	0	0	0	0	0	0	0	0	0	0	0	0	0	0
Solyc01g016950	0	0	0	0	0	0	0	0	0	0	0	0	0	0	0	0	0	0	0	0
Solyc01g016960	0	0	0	0	0	0	0	0	0	0	0	0	0	0	0	0	0	0	0	0.16
Solyc01g016970	0.22	0	0	0.26	0	0	0	0.26	0	0	0	0	0	0	0	0.84	0.48	0	0.98	0.41
Solyc01g016980	0	0	0	0	0	0	0	0	0	0	0	0	0	0	0	0	0	0	0	0
Solyc01g016990	0	0	0	0	0	0	0	0	0	0	0	0	0	0	0	0	0	0	0	0
Solyc01g017000	0	0	0	0	0	0	0	0	0	0	0	0	0	0	0	0	0	0	0	0
Solyc01g017010	0	0	0	0	0	0	0	0	0	0	0	0	0	0	0	0	0	0	0	0
Solyc01g017020	0	0	0	0	0	0	0	0	0	0	0	0	0	0	0	0	0	0	0	0
Solyc01g017030	0	0	0	0	0	0	0	0	0	0	0	0	0	0	0	0.23	0	0	0	0
Solyc01g017040	0	0	0	0	0	0	0	0	0	0	0	0	0	0	0	0	0	0	0	0
Solyc01g017050	0	0	0	0	0	0	0	0	0	0	0	0	0	0	0	0	0	0	0	0
Solyc01g017060	0	0.13	0	0	0	0	0	0	0	0	0.21	0	0	0.14	0	0	0	0	0.11	0.23
Solyc01g017070	0	0	0	0	0	0	0	0	0	0	0.48	0	0	0.33	0	0	0	0	0	0
Solyc01g017080	0	0	0	0	0	0	0	0	0	0	0	0	0	0	0	0	0	0	0	0.11
Solyc01g017090	0.13	0.65	0.15	0	0.14	0.15	0	0.61	0	0	0.65	0.75	0	0.44	0	0.16	0	0	0	0.24
Solyc01g017100	0	0	0.27	0.28	0	0	0	0	0	0	0.39	0	0.27	0	0.36	0	0	0.26	0.21	0.21
Solyc01g017110	0.07	0.3	0	0	0	0.08	0	0	0	0	0	0.22	0	0	0	0	0	0.16	0	0
Solyc01g017120	0	0	0	0	0	0	0	0	0	0	0	0	0	0	0	0	0	0	0	0
Solyc01g017130	0	0	0	0	0	0	0.44	0	0	0	0	0	0	0.85	0	0.47	0	0	0	0
Solyc01g017140	0	0	0	0.2	0	0	0	0	0.12	0	0	0	0.29	0	0	0	0	0	0	0
Solyc01g017150	0	0	0	0	0	0	0	0	0	0	0	0	0	0	0	0	0	0	0	0
Solyc01g017160	0	0	0	0	0	0	0	0	0	0	0	0	0	0	0	0	0	0	0	0
Solyc01g017170	0.41	0.21	0.72	0.49	1.4	0.71	0	0.49	0.29	0.29	1.75	1.22	2.6	1.9	0.64	0.52	1.12	0.46	2.02	1.91
Solyc01g017180	0	0	0	0	0	0	0	0	0	0	0	0	0	0	0	0	0	0	0	0
Solyc01g017190	0	0	0	0	0	0	0	0	0	0	0	0	0	0	0	0.33	0	0	0	0
Solyc01g017200	0	0	0	0	0	0	0	0	0	0	0	0	0.29	0	0	0	0	0	0.22	0
Solyc01g017210	0	0	0	0	0	0	0	0	0	0	0	0	0	0	0	0	0	0	0	0
Solyc01g017220	4.69	1.8	11.26	9.83	44.55	45.71	5.28	7.03	18.7	18.54	63.07	51.9	83.44	83.62	32.08	29.09	15.28	16.15	11.22	13.55
Solyc01g017230	0	0.14	0	0	0	0	0	0	0	0	0	0	0.16	0	0	0	0	0.15	0	0
Solyc01g017240	0	0	0	0	0	0	0	0	0	0	0	0.35	0	0	0.37	0	0	0	0	0
Solyc01g017250	0	0	0	0	0	0	0	0	0	0	0	0	0.28	0	0	0.31	0	0	0	0
Solyc01g017260	0	0	0	0	0	0	0	0	0	0	0	0	0	0	0	0	0	0	0	0
Solyc01g017270	0	0	0	0	0	0	0	0	0	0	0	0	0	0	0	0	0.49	0	0	0
Solyc01g017280	0	0	0	0	0	0	0	0	0	0	0	0	0	0	0	0	0	0	0	0
Solyc01g017290	0	0	0	0	0	0	0	0	0	0	0	0	0	0	0	0	0	0	0	0
Solyc01g017300	0.2	0.1	0.12	0.24	0.23	0	0	0	0.14	0.14	1.04	1.05	1.17	0.47	0	0.13	0	0	0.09	0.09
Solyc01g017310	0	0	0	0	0	0	0	0	0	0	0	0	0	0	0	0	0	0	0	0
Solyc01g017320	0.41	0	0	0	0	0.48	0.49	0	0	0	0	0	0.47	0.48	0	0	0	0	0.37	0
Solyc01g017330	0.82	0.21	0.48	0.49	2.09	0.71	0	0.25	0.57	0.29	4.16	4.53	2.35	2.6	0	0.26	0	0	0.36	0.19
Solyc01g017340	0.24	0.5	0.28	0	0.55	0.42	0	0.29	0	0	0	0.18	0.28	0.28	0	0	0	0	0	0.11
Solyc01g017350	0.19	0.79	0.23	0	0	0	0	0	0	0.27	0.33	0	0	0	0	0	0	0	0	0
Solyc01g017360	0.3	0.31	0	0	0	0	0	0	0	0	0.51	0.45	0	0	0	0	0	0	0.27	0
Solyc01g017370	0.17	0	0	0	0.39	0	0.41	0.21	0	0	0.29	0.25	0	0.2	0	0	0.19	0	0.61	0.32
Solyc01g017380	0	0	0	0	0	0	0	0	0	0.46	0	0	1.14	0.76	0	0.42	0	0	0	0
Solyc01g017390	0	0	0	0	0	0	0	0	0	0	0	0	0	0	0	0	0	0	0	0
Solyc01g017400	0.26	0.67	1.06	0.16	1.78	1.66	0	0.16	0.18	0.55	1.33	1.15	1.05	0.9	0.4	0.17	0.57	0.15	1.04	1.69
Solyc01g017410	0	0	0	0	0	0	0	0	0	0	0	0	0.2	0	0	0	0	0	0	0
Solyc01g017420	0	0	0	0	0.07	0	0.07	0	0.08	0.08	0.1	0	0.27	0.14	0.09	0	0	0	0.1	0
Solyc01g017430	0	0	0	0	0	0	0	0	0	0	0	0	0	0	0	0	0	0	0	0
Solyc01g017440	0	0	0	0	0	0	0	0.17	0	0	0	0	0.16	0	0	0	0	0	0	0.13
Solyc01g017450	0	0	0	0	0	0	0	0	0	0	0	0	0	0	0	0	0	0	0	0
Solyc01g017460	1.09	0	0	0	0	0.63	0	0.66	0	0	2.78	1.61	0.63	1.89	0	0	0	0	0.49	0.51
Solyc01g017470	0.2	0.2	0	0	0.23	0	0.24	0	0	0	0.34	1.18	0	0	0	0	0.22	0	0	0
Solyc01g017480	0	0	0	0	0	0	0	0	0	0	0	0	0	0	0	0	0	0	0	0
Solyc01g017490	0	0	0	0	0	0	0	0	0	0	0	0	0	0	0	0	0	0	0	0
Solyc01g017500	0	0	0	0	0	0	0	0	0	0	0	0	0	0	0	0	0	0	0	0
Solyc01g017510	0	0	0.11	0	0	0	0.11	0	0	0	0	0.14	0	0	0	0	0	0	0.09	0.09
Solyc01g017520	0.34	0	0	0	0.39	0	0	0	0	0	0	0	0	0	0.53	0	0	0	0	0
Solyc01g017530	0	0	0.33	0.17	0	0.16	0	0	0	0.4	0.24	0.42	0	0.33	0	0	0	0.16	0	0.26
Solyc01g017540	0	0	0	0	0.34	0.34	1.42	0.36	0	0	0	0	0	0	0	0	0	0	0	0
Solyc01g017550	0	0.11	0.13	0	0	0	0	0	0	0	0	0	0	0	0	0.14	0.12	0	0	0
Solyc01g017560	0.4	0	0	0.48	0	0.23	0	0	0	0	0	0.29	0	0	0	0	0	0	0	0
Solyc01g017570	0	0	0	0	0	0	0	0	0	0	0	0	0	0	0	0	0	0	0	0
Solyc01g017580	0	0	0	0	0	0	0	0	0	0	0	0	0	0	0	0	0	0	0	0
Solyc01g017590	3.88	2.65	1.5	3.1	2.93	1.49	3.1	3.1	1.79	0	2.19	1.91	1.48	0	0	1.64	0	0	0	1.2
Solyc01g017600	31.65	32.25	28.13	25.53	29.26	34.59	6.7	7.39	0.99	1.28	0.33	0.48	0.22	0.22	0	0	0.14	0	0	0
Solyc01g017610	0	0	0	0	0	0	0	0	0	0	0	0	0	0	0	0	0	0	0	0
Solyc01g017620	0	0	0	0	0	0	0	0	0	0	0	0	0	0	0	0	0	0	0	0
Solyc01g017630	0	0	0	0	0	0	0	0	0	0	0	0	0	0.29	0	0	0	0	0	0
Solyc01g017640	0	0	0	0	0	0	0	0	0	0	0	0	0	0	0	0	0	0	0	0
Solyc01g017650	0	0	0	0	0	0	0	0	0	0	0	0	0	0	0	0	0	0	0	0
Solyc01g017660	0	0	0	0	0	0	0	0	0	0	0	0	0	0	0	0	0	0	0	0
Solyc01g017670	0	0	0	0	0	0	0	0	0	0	0	0	0	0	0	0	0	0	0	0
Solyc01g017680	0	0	0	0	0	0	0	0	0	0	0	0	0	0	0	0	0	0	0	0
Solyc01g017690	0	0	0	0	0	0	0	0	0	0	0	0	0	0	0	0	0	0	0	0
Solyc01g017700	0	0	0	0	0	0	0	0	0	0	0	0	0	0	0	0	0	0	0	0
Solyc01g017710	0	0	1.27	5.89	1.86	0.63	1.97	2.62	0.76	0	0	0	0	0	1.69	0	0	0	0.49	0
Solyc01g017720	4	1.82	5.69	4.79	1.51	0.51	3.2	2.13	0	1.25	1.51	0.66	0.51	1.03	1.37	1.7	0	0	0	0.41
Solyc01g017730	0	0	0	0	0	0	0	0	0	0	0	0	0	0	0	0	0	0	0	0
Solyc01g017740	0.29	0.89	0	0.35	2.3	1.01	0	0	0.4	0	4.42	1.28	3.33	3.35	0	0.74	0	0.33	1.81	1.61
Solyc01g017750	0.19	0	0	0	0	0	0	0	0	0	0	0	0	0	0	0	0	0	0	0
Solyc01g017760	0	0	0	0	0	0	0	0	0	0	0	0	0	0	0	0	0	0	0	0
Solyc01g017770	0	0	0	0	0	0	0	0	0	0	0	0	0	0	0	0.1	0	0	0	0
Solyc01g017780	0	0	0	0	0	0	0	0	0	0	0	0	0	0	0	0	0	0	0	0
Solyc01g017790	0	0	0	0	0	0	0	0	0	0	0	0	0	0	0	0	0	0	0	0
Solyc01g017800	0	0	0	0	0	0	0	0	0	0	0	0	0	0	0	0	0	0	0	0
Solyc01g017810	0	0	0	0	0	0	0	0	0	0	0	0	0	0	0	0	0	0	0	0
Solyc01g017820	0	0	0	0	0	0	0	0	0	0	0	0	0	0	0	0	0	0	0	0
Solyc01g017830	0	0	0	0	0	0	0	0	0	0	0	0	0	0	0	0	0	0	0	0
Solyc01g017840	0.29	0.29	0.25	0.26	0.08	0.5	0	0	0.2	0.4	0.61	0.74	0.74	1.08	0.55	0.82	0.08	0	0	0
Solyc01g017850	0	0.04	0	0.04	0.04	0	0	0	0	0	0	0	0	0	0	0	0	0	0	0
Solyc01g017860	4.34	4.44	3.78	2.16	2.46	4.59	3.47	4.77	5.51	6.1	7.96	4.8	12.03	11.27	6.69	4.6	7.46	6.1	10.29	11.03
Solyc01g017870	4.16	3.27	0	0	0	0	0.38	0	0	0.45	0	0	0	0	0	0	0	0	0	0
Solyc01g017880	0	0	0	0	0	0	0	0	0	0	0	0	0	0	0	0	0	0	0	0
Solyc01g017890	0	0	0	0	0	0	0	0	0	0	0	0	0	0	0	0	0	0	0	0
Solyc01g017900	0	0	0	0	0	0	0	0	0	0	0	0	0	0	0	0	0	0	0	0
Solyc01g017910	0	0	0	0	0	0	0	0	0	0	0	0	0	0	0	0	0	0	0	0
Solyc01g017920	0	0	0	0	0	0	0	0	0	0	0	0	0	0	0	0	0	0	0	0
Solyc01g017930	0	0	0	0	0	0	0	0	0	0	0	0	0	0	0	0	0	0	0	0
Solyc01g017940	0	0	0	0	0	0	0	0	0	0	0	0	0	0	0	0	0	0	0	0
Solyc01g017950	0	0	0	0	0	0	0	0	0	0	0	0	0	0	0	0	0	0	0	0
Solyc01g017960	0	0	0	0	0	0	0	0	0	0	0	0	0	0	0	0	0	0	0	0
Solyc01g017970	0	0	0	0	0	0	0	0	0	0	0	0	0	0	0	0	0	0	0	0
Solyc01g017980	0	0	0	0	0	0	0	0	0	0	0	0	0	0	0	0	0	0	0	0
Solyc01g017990	0	0	0	0	0	0	0	0	0	0	0	0	0	0	0	0	0	0	0	0
Solyc01g018000	0	0	0	0	0	0	0	0	0	0	0	0	0	0	0	0	0	0	0	0
Solyc01g018010	0	3.23	1.23	2.52	2.39	4.87	5.06	3.79	4.38	1.48	5.35	4.66	2.42	6.08	1.62	1.34	1.14	1.18	0.94	0
Solyc01g018020	3.18	3.21	6.55	7.22	0	0	0.04	0	0	0	0	0	0	0	0	0	0.08	0	0	0.03
Solyc01g018040	0	0	0	0	0	0	0	0	0	0	0	0	0	0	0	0	0	0	0	0
Solyc01g018050	0	0	0	0	0	0	0	0	0	0	0	0	0	0	0	0	0	0	0	0
Solyc01g018060	2.63	3.77	4.29	0.63	17.92	15.82	0	0	2.19	1.48	0.89	3.88	2.42	3.04	0.81	4.02	0.57	1.18	1.87	3.9
Solyc01g018070	0	0	0	0	0	0	0	0	0	0	0	0	0	0	0	0	0	0	0	0
Solyc01g018080	0	0	0	0	0	0	0	0	0	0	0	0	0	0	0	0	0	0	0	0
Solyc01g018090	0	0.58	0.66	1.36	2.9	3.94	0	0	0	1.2	11.56	7.55	6.2	6.24	0.44	0	0	0	0.76	0.26
Solyc01g018100	0	0	0	0	0	0	0	0	0	0	0	0	0	0	0	0	0	0	0	0
Solyc01g019100	0	0	0	0	0	0	0	0	0	0	0	0	0	0	0	0	0	0	0	0
Solyc01g020100	0	0	0	0	0	0	0	0	0	0	0	0	0	0	0	0	0	0	0	0
Solyc01g020110	0	0	0	0	0	0	0	0	0	0	0	0	0	0	0	0	0	0	0	0
Solyc01g020120	0.38	0	0.22	0	0.43	0.44	0.23	0.91	0.79	0.8	0.32	1.12	0.22	0	1.75	2.41	0	0.64	1.01	0
Solyc01g020130	4.48	3.74	3.83	5.04	5.08	6.97	16.14	13.05	4.56	3.73	4.49	5.8	4.3	4.12	9.58	7.1	7.74	8.64	10.74	8.46
Solyc01g020140	7.27	7.28	5.51	6.05	6.27	8.58	22.96	22.55	7.89	7.55	7.49	7.92	5.26	5.66	9.5	6.83	9.43	11.9	15.18	13.44
Solyc01g020150	15.96	12.42	11.7	11.63	15.34	9.21	40.4	35.77	12.5	12.19	8.81	16.37	7.96	15.22	14.97	15	21.84	26.52	19.44	23.73
Solyc01g020160	1.48	1.13	0.43	0.44	0.84	0.43	1.33	0.89	1.02	0	0	0.54	0	0.43	0	0	0	0.83	0	0
Solyc01g020170	0	0	0	0	0	0.11	0	0	0	0	0	0	0	0	0	0	0	0	0	0
Solyc01g020180	0	0	0	0	0	0	0	0	0	0	0	0	0	0	0	0	0	0	0	0
Solyc01g020190	5.2	6.44	8.06	9.05	5.71	6.91	20.41	16.42	11.13	12.17	17.06	14.63	32.7	28.17	19.89	22.83	13.5	14.87	17.93	15.72
Solyc01g020200	0	0	0	0.22	0	0.21	0	0.44	0	0	2.47	1.34	0.84	0	0.56	0.23	0.4	0.2	0.49	0.34
Solyc01g020210	0	0	0	0	0	0	0	0	0	0	0	0	0	0	0	0	0	0	0	0
Solyc01g020220	6.85	8.17	6.33	5.73	7.45	6.72	12.96	11.71	16.4	7.39	8.58	9.55	13.57	13.11	9.11	10.51	5.2	5.7	9.85	8.68
Solyc01g020230	1.19	1.21	1.38	0.35	1.68	0	3.56	3.55	2.88	2.08	2.01	0	2.04	2.05	2.28	2.26	2.89	1.67	3.69	3.29
Solyc01g020240	14.98	15	11.71	10.53	12.14	10.23	13.62	15.82	22.79	21.23	18.02	14.1	21.5	14.2	15.91	18.32	14.94	15.55	24.38	22.09
Solyc01g020250	0	0	0	0	0	0	0	0	0	0	0	0	0	0	0	0	0	0	0	0
Solyc01g020260	1.24	0	0	0	0	0	0	0	0	0	0	0	0	0	0	0	0	0	0	0
Solyc01g020270	0	0	0	0	0	0	0	0	0	0	0	0	0	0	0	0	0	0	0	0
Solyc01g020280	0	0	0	0	0	0	0	0	0	0	0	0	0	0	0	0	0	0	0	0
Solyc01g020290	4.66	3.18	0	1.24	2.35	0	1.86	1.24	2.87	5.81	2.63	3.05	2.37	2.39	5.58	4.6	5.61	2.91	1.84	0.96
Solyc01g020300	0	0	0	0	0	0	0	0	0	0	0	0	0	0	0	0	0	0	0	0
Solyc01g020310	0	0	0	0	0	0	0	0	0	0	0	0	0	0	0	0	0	0	0	0
Solyc01g020320	17.48	14.34	11.17	13.94	8.57	11.64	6.05	8.49	15.5	15.49	7.73	7.66	13.01	13.09	9.95	12.61	8.54	8.32	5.74	7.71
Solyc01g020330	1.66	3.39	6.75	2.97	1.88	2.87	6.96	5.96	9.19	6.99	18.24	17.11	26.62	17.22	8.94	9.48	11.69	10.24	9.58	7.66
Solyc01g020340	0.56	0.32	0.22	0.37	0.36	0.51	0.75	0.75	0.52	0.35	0.74	1.2	1.37	1.08	0.97	0.56	0.34	0.28	0.56	0.52
Solyc01g020350	0	0	0	0	0	0	0	0	0	0	0	0	0	0	0	0.7	0	0	0	0
Solyc01g020360	0.47	0.49	0	0	0	0	0	0	0	0	0	0	0	0	0	0	0	0	0	0
Solyc01g020370	0	0	0	0	0	0	0	0	0	0	0	0	0	0	0	0	0	0	0	0
Solyc01g020380	0.27	0	0.52	0.11	0.1	0	0	0	0	0	0	0	0	0	0	0.11	0.1	0.1	0.16	0
Solyc01g020390	0	0	0	0	0	0	0	0	0	0	0	0	0	0	0	0	0	0	0	0
Solyc01g020400	0	0	0	0	0	0	0	0	0	0	0	0	0	0	0	0	0	0	0	0
Solyc01g020410	0	0	0	0	0	0	0	0	0	0	0	0	0	0	0	0	0	0	0	0
Solyc01g020430	0	0	0	0	0	0	0	0	0	0	0	0	0	0	0	0	0	0	0	0
Solyc01g020440	12.93	13.95	8.54	7.62	11.71	11.17	24.33	20.79	34.03	29.93	21.56	23.66	19.97	19.72	20.91	20.48	8.95	11.17	12.54	12.13
Solyc01g020450	0	0	0	0	0	0	0	0	0	0	0	0	0	0	0	0	0	0	0	0
Solyc01g020460	0	0	0	0	0	0	0	0	0	0	0	2.71	0	0.12	0	0	0	0	0	0
Solyc01g020470	0	0	0	0	0	0	0	0	0	0	0.43	0.38	0	0.3	0	0	0	0	0	0
Solyc01g020480	0	0	0	0	0	0	0	0	0	0	0	0	0	0	0	0	0	0	0	0
Solyc01g020490	0	0	0	0	0	0	0	0	0	0	0	0	0	0	0	0	0	0	0	0
Solyc01g020500	11.13	4.43	5.03	5.92	3.51	6.43	8.91	5.19	5.14	6.08	11.52	10.03	16.32	24.27	13.34	8.65	8.05	5.56	10.45	12
Solyc01g020510	0	0	0	0	0	0	0	0	0	0	0	0	0	0	0	0	0	0	0	0
Solyc01g020520	2.16	2.47	2.43	2.81	2.59	1.96	5.25	4.93	3.35	3.3	3.32	2.21	2.62	2.79	5.13	3.07	3.47	2.57	3.48	3.08
Solyc01g020530	0	0	0	0.41	0	0.2	0.41	0.2	0	0	0	0	0	0	0.26	0.22	0	0.38	0	0.31
Solyc01g020550	0	0	0	0	0	0	0	0	0	0	0	0	0	0	0	0	0	0	0	0
Solyc01g020560	0.22	0	0	0	0	0	0	0	0	0	0	0	0	0	0	0	0	0	0	0
Solyc01g020570	0	0.22	0	0.25	0	0.49	0.76	1.01	0.58	0.3	0	0	0	0.24	0	0.27	0	0	0	0
Solyc01g020580	0	0	0	0	0	0	0	0	0	0	0	0	0	0	0	0	0	0	0	0
Solyc01g020590	0	0	0	0	0	0	0	0	0	0	0	0	0	0	0	0	0	0	0	0
Solyc01g020600	0	0	0.32	0.33	0	0	0	0	0	0	0	0	0	0	0	0	0	0	0	0
Solyc01g021600	0.67	0.34	0.64	0.8	0.63	1.15	15.17	16.48	1.08	1.09	0.94	0.98	0.38	0.13	0.34	0.14	0	0	0	0
Solyc01g021610	0	0	0	0	0	0	0	0	0	0	0	0	0	0	0	0	0	0	0	0
Solyc01g021620	0	0	0	0	0	0	0	0	0	0	0	0	0	0	0	0	0	0	0	0
Solyc01g021630	0	0	0	0	0	0	0.6	0	0	0	0	0	0	0	0	0	0	0	0	0
Solyc01g021640	4.53	4.91	6.67	7.55	5.39	5.7	13.07	14.92	8.01	5.25	8.58	7.08	10.51	9.65	10.41	11.19	8.54	9.49	12.57	12.7
Solyc01g021650	0	0	0	0	0	0	0	0	0	0	0	0	0	0	0	0	0	0	0	0
Solyc01g021660	0	0	0	0	0	0	0	0	0	0	0	0	0	0	0	0	0	0	0	0
Solyc01g021670	29.14	31.21	31.49	28.48	12.87	14.37	21.18	21.32	30.33	30.75	45.16	34.69	50.37	48.31	77.33	74.43	57.44	60.11	44.04	43.11
Solyc01g021680	0	0	0	0	0	0	0	0	0	0	0	0	0	0	0	0	0	0	0	0
Solyc01g021690	0	0	0	0	0	0	0	0	0	0	0	0	0	0	0	0	0	0	0	0
Solyc01g021700	0	0	0	0	0	0	0	0	0	0	0	0	0	0	0	0	0	0	0	0
Solyc01g021710	0	0	0	0	0	0	0	0	0	0	0	0	0	0	0	0	0	0	0	0
Solyc01g021720	0	0	0	0	0	0	0.39	0	0	0	0	0.96	0	0	0	0	0	0	0	0
Solyc01g021730	1.28	1.06	0	0	0	0	0.1	0	0	0.11	0	0	0.09	0	0	0.41	0.52	0.36	1.78	1.55
Solyc01g021740	4.82	3.45	1.68	0.58	4.92	6.12	3.47	5.78	4.68	3.39	2.04	4.98	2.49	3.34	4.46	2.76	3.92	3.25	3.43	1.56
Solyc01g022740	2.61	2.19	3.43	3.18	2.37	2.52	3.31	2.39	1.98	2.27	3.06	2.59	3.05	3.02	5.42	5.02	2.68	3.04	4.86	4.74
Solyc01g022750	58.36	59.22	55.89	52.41	28.98	30.48	103.87	101.18	57.75	61.71	81.18	66.86	54.05	52.47	71.85	72.7	92.23	92.34	99.7	104.27
Solyc01g022760	0	0	0	0	0	0	0	0	0	0	0	0	0	0	0	0	0	0	0	0
Solyc01g022770	0	0	0	0	0.9	0	0	0	0	0	0	0	0	0	0	0	0	0	0	0
Solyc01g022780	0	0	0	0	0	0	0	0	0	0	0	0	0	0	0	0	0	0	0	0
Solyc01g022790	0	0	0	0	0	0	0	0	0	0	0	0	0	0	0	0	0	0	0	0
Solyc01g028800	1.8	1.61	0.85	0.69	0	0	1.93	2.11	0.69	0.86	4.15	3.22	1.89	1.95	0.95	1.37	0.5	0.22	0.1	0.21
Solyc01g028810	225.41	220.29	211	216.09	164.5	161.99	106.86	103.45	667.16	633.32	581.64	505.89	530.29	491.78	271.84	261.55	352.85	345.98	660.1	655.22
Solyc01g028830	16.08	15.2	15.03	14.68	23.13	22.27	37.88	33.8	17.35	17.59	21.72	15.16	19.5	18.92	23.13	21.81	14.3	13.16	9.41	10.96
Solyc01g028840	0	0	0	0	0	0	0	0	0	0	0	0	0	0	0	0	0	0	0	0
Solyc01g028850	0	0.24	0	0	0	0	0	0	0	0	0	0	0	0	0.18	0	0	0.13	0	0
Solyc01g028860	40.03	40	77.48	77.78	44.4	44.89	148.16	138.85	96.35	88.35	198.62	172.18	343.49	332.13	236.85	229.75	199.39	195.42	202.35	200.66
Solyc01g028870	12.79	13.21	12.33	11.34	23.83	25.3	9.1	7.17	27.83	24.3	30.59	28.47	32.41	27.89	27.56	29.67	15.88	18.11	34.98	32.13
Solyc01g028880	0	0	0	0	0	0	0	0	0	0	0	0	0	0	0	0	0	0	0	0
Solyc01g028890	0	0	0	0	0	0	0	0	0	0	0	0	0	0	0	0	0	0	0	0
Solyc01g028900	120.33	120.23	139.85	133.92	54.9	54.33	86.3	87.49	65.53	66.76	70.08	63.06	77.95	74.2	98.15	94.69	102.56	103.26	99.58	95.87
Solyc01g028910	0	0	0	0	0	0	0	0	0	0	0	0	0	0	0	0	0	0	0	0
Solyc01g028920	0	0	0	0	0	0	0	0	0	0	0	0	0	0	0	0	0	0	0	0
Solyc01g028930	35.44	31.5	27.47	26.9	22.11	22.96	30	26.58	26.4	23.88	25.81	23.6	20.37	18.65	18.55	22.19	16.79	13.7	20.6	18.31
Solyc01g028940	0	0	0	0	0	0	0	0	0	0	0	0	0	0	0	0	0	0	0	0
Solyc01g028950	0	0	0	0	0	0	0	0	0	0	0	0	0	0	0	0	0	0	0	0
Solyc01g028960	0	0	0	0	0	0	0	0	0	0	0	0	0	0	0	0	0	0	0	0
Solyc01g028970	0	0	0	0	0	0	0	0	0	0	0	0	0	0	0	0	0	0	0	0
Solyc01g028980	0	0	0	0	0	0	0	0	0	0	0	0	0	0	0	0	0	0	0	0
Solyc01g033980	2.9	2.44	3.37	4.28	1.35	1.77	5.73	1.43	4.72	4.79	5.19	3.52	7.62	3.15	4.46	6.71	7.21	5.36	10.15	8.82
Solyc01g033990	0	0	0	0	0	0	0	0	0	0	0	0	0	0	0	0	0	0	0	0
Solyc01g034000	0	0	0.05	0	0	0	0	0	0	0	0	0	0	0	0	0	0	0	0	0
Solyc01g034010	0.11	0	0.44	0.26	0.06	0.06	0	0	0.07	0.08	0	0	0.06	0.37	0.17	0	0	0.06	0.24	0.15
Solyc01g034020	42.8	41.47	37.09	38.69	31.3	35.2	45.42	47.41	51.34	51.19	50.8	41.62	40.18	38.87	46.22	46.01	47.9	46.79	36.1	36.67
Solyc01g034030	0	0	0	0	0	0	0	0	0	0	0	0	0	0	0	0	0	0	0	0
Solyc01g034040	0	0	0	0	0	0	0	0	0	0	0	0	0	0	0	0	0	0	0	0
Solyc01g034050	0.38	0	0.22	0	0.22	0	0.23	0.46	0.79	0.54	0	0.28	0.22	0.44	0.88	0	0	0.43	0.34	0.18
Solyc01g034060	0	0	0	0	0	0	0	0	0	0	0	0	0	0	0	0	0	0	0.23	0
Solyc01g034070	0	0	0	0	0	0.23	0	0	0	0	0	0	0	0	0.31	0	0	0	0	0
Solyc01g034080	0.18	0.06	0.49	0.36	0.21	0.14	0.07	0.07	0.33	0.17	0.1	0.18	0.07	0.21	0	0.08	0	0.07	0	0
Solyc01g034090	0	0	0	0	0	0	0	0	0	0	0	0	0	0	0	0	0	0	0	0
Solyc01g034100	0.42	0.49	0.42	0.36	0.07	0.28	0.22	0.14	0.08	0.17	0.2	0.18	0.48	0.28	0.46	0.38	0	0.07	0.27	0.22
Solyc01g034110	0	0	0	0	0	0	0	0	0	0	0	0	0	0	0	0	0	0	0	0
Solyc01g034120	0.19	0	0	0.45	0	0	0	0	0	0.27	0	0	0.87	0	0	0	0	0	0	0.17
Solyc01g034130	0	0.11	0.12	0.12	0	0	0	0.06	0	0	0	0	0.12	0	0.24	0.13	0	0	0.09	0
Solyc01g034140	0	0	0	0	0	0	0	0	0	0	0	0	0	0	0	0	0	0	0	0
Solyc01g034150	5.41	5.42	8.84	7.78	5.4	6.37	14.25	16.14	5.03	4.73	6.47	4.41	7.29	7.42	6.18	9.04	5.21	5.02	9.35	9.12
Solyc01g034160	0	0	0	0	0	0	0	0	0	0	0	0	0	0	0	0	0	0	0	0
Solyc01g034170	0	0	0	0	0	0	0	0	0	0	0	0	0	0	0	0	0	0	0	0
Solyc01g034180	0	0	0	0	0	0	0	0	0	0	0	0	0	0	0	0	0	0	0	0
Solyc01g034190	0	0	0	0	0	0	0	0	0	0	0	0	0	0	0	0	0	0	0	0
Solyc01g034200	0	0	0	0	0	0	0	0	0	0	0	0	0	0	0	0	0	0	0	0
Solyc01g034210	0	0	0	0	0	0	0	0	0	0	0	0	0	0	0	0	0	0	0	0
Solyc01g034220	0	0	0	0	0	0	0	0	0	0	0	0	0	0	0	0	0	0	0	0
[truncated: 32,730 more rows]

## Sheet: Supplementary Table 2
Supplementary Table 2. The average of normalized expression (RPKM) of tomato genes based on RNA-seq data.
gene ID	Heinz_bud	Heinz_flower	Heinz_leaf	Heinz_root	Heinz_1cm_fruit	Heinz_2cm_fruit	Heinz_3cm_fruit	Heinz_MG	Heinz_B	Heinz_B10
Solyc00g005000	0.03	0.12	0.55	137.28	0	0	0.09	0.18	0	0
Solyc00g005020	0	0	0	0	0	0	0	0	0.1	0.24
Solyc00g005040	2.86	3.47	6.73	1.31	7	3.68	3.76	4.88	5.3	4.22
Solyc00g005050	54.97	41.23	38.98	53.02	46.66	42.23	44.42	50.91	45.47	49.43
Solyc00g005060	0	0	0	0	0	0	0	0	0	0
Solyc00g005070	0	0	0	0	0	0	0	0	0	0
Solyc00g005080	0	0	0.17	0.69	0	0.43	0.5	0.19	0	0.14
Solyc00g005090	0	0	0	0	0	0	0	0	0	0
Solyc00g005100	0	0	0	0	0	0	0	0	0	0
Solyc00g005110	0	0	0	0	0	0	0	0	0	0
Solyc00g005120	0	0.27	0	0	0	0	0	0	0	0
Solyc00g005130	0.12	0	0	0	0	0	0.14	0	0.26	0
Solyc00g005140	0	0.1	0	0	0	0	0	0	0	0
Solyc00g005150	0.34	0.18	0.39	0.23	0.16	0.13	0.09	0.47	0.21	0.17
Solyc00g005160	0	0	0	0	0	0	0	0	0	0
Solyc00g005170	0	0	0	0	0	0	0	0	0	0
Solyc00g005180	0	0	0	0	0	0	0	0	0	0
Solyc00g005280	0	0	0	0	0	0	0	0	0	0
Solyc00g005420	0	0	0	0	0	0	0	0	0	0
Solyc00g005430	0	0	0	0	0	0	0	0	0	0
Solyc00g005440	12.44	12.24	5.85	12.45	34.32	11.12	19.35	16.57	11.93	7.74
Solyc00g005450	0	0	0	0	0	0	0	0	0	0
Solyc00g005460	0	0	0.31	0	0	0	0	0	0	0
Solyc00g005470	0	0	0	0	0	0	0	0	0	0
Solyc00g005480	0.12	0.14	0	0	0	0	0	0	0	0
Solyc00g005490	0	0	0	0	0	0	0	0	0	0
Solyc00g005840	31.64	48.86	90.99	3.95	15.04	17.07	8.03	17.05	10.23	2.91
Solyc00g005850	0	0	0	0	0	0	0	0	0	0.08
Solyc00g005860	0	0	0	0.17	0	0.23	0	0	0.16	0.25
Solyc00g005870	0	0	0	0.05	0	0	0.1	0	0	0
Solyc00g005880	0	0	0	0	0	0	0	0	0	0
Solyc00g005890	0.99	0	0.56	0	0	0.83	0	0	0	0
Solyc00g005900	0	0	0.17	0	0	0	0	0.19	0	0
Solyc00g005980	0	0	0	0	0	0	0	0	0	0
Solyc00g006010	0	0	0	0	0	0	0	0	0	0
Solyc00g006020	0	0	0	0	0	0	0	0	0	0
Solyc00g006050	0	0.1	0	0	0	0	0	0	0	0
Solyc00g006090	0	0	0	0	0	0	0	0	0	0
Solyc00g006170	0	0	0	0	0	0	0	0	0	0
Solyc00g006250	0	0	0	0	0	0	0	0	0	0
Solyc00g006470	0	0	0	0	0	0.36	0	0	0	0
Solyc00g006480	0	0	0	0	0	0	0	0	0	0
Solyc00g006490	9.78	12.04	10.66	19.76	6.77	9.45	10.88	15.02	15.13	15.75
Solyc00g006500	0	0	0	0	0	0	0	0	0	0
Solyc00g006510	0	0	0	0	0	0	0	0	0	0
Solyc00g006520	0	0	0	0	0	0	0	0	0	0
Solyc00g006530	0	0	0	0	0	0	0	0	0	0
Solyc00g006540	0	0	0	0	0	0	0	0	0	0
Solyc00g006550	0	0	0	0	0	0	0	0	0	0
Solyc00g006560	0	0	0	0	0	0	0	0	0	0
Solyc00g006570	0	0	0	0	0	0	0	0	0	0
Solyc00g006590	0.06	0	0	0	0	0	0	0	0	0.21
Solyc00g006600	0.23	0.09	0.13	0.32	0.11	0	0.05	0.37	0.09	0.34
Solyc00g006630	0	0	0	0	0	0	0	0	0	0
Solyc00g006650	0	0	0	0	0	0	0	0	0	0
Solyc00g006660	0	0	0	0	0	0	0	0	0	0
Solyc00g006670	0	0	0	0	0	0	0	0	0	0
Solyc00g006680	0	0	0	0	0	0	0	0	0	0
Solyc00g006690	0	0	0	0	0	0	0	0	0	0
Solyc00g006700	0	0	0	0	0	0	0	0	0	0
Solyc00g006800	70.63	119.5	16.98	308.93	123.99	165.87	136.79	135.68	110.11	145.91
Solyc00g006810	20.36	18.17	38.85	5.78	21.61	17.8	15.25	20.04	32.17	34.19
Solyc00g006820	10.32	6.68	18.48	1.29	2.89	4.78	9.92	3.68	0.97	0.31
Solyc00g006830	4.54	4.78	4.21	22.02	7.09	16.11	15.61	18.69	17.2	17.63
Solyc00g006840	0	0	0	0	0	0	0	0	0	0
Solyc00g006850	0	0	0	0	0	0	0	0	0	0
Solyc00g006860	0	0	0	0	0	0	0	0	0	0
Solyc00g006870	0	0	0	0	0	0	0	0	0	0
Solyc00g006880	0	0	0	0	0	0	0	0	0	0
Solyc00g006890	0	0	0	0	0	0	0	0	0	0
Solyc00g006900	0.62	0.73	1.71	1.37	1.35	2.65	2.42	1.32	3.02	3.17
Solyc00g007000	0	0.34	0	0.34	0	0	0	0	0	0
Solyc00g007010	25.36	9.37	7.11	15.81	8.76	10.41	5.33	6.66	8.39	13.93
Solyc00g007020	0	0	0	0	0	0	0	0	0	0
Solyc00g007030	0	0	0	0.07	0.17	0.2	0.07	0	0	0
Solyc00g007040	0	0	0	0	0.09	0	0.14	0	0	0
Solyc00g007050	0	0	0	0	0	0	0	0	0	0
Solyc00g007060	8.86	6.93	11	21.89	11.07	8.36	6.87	8.39	6.11	5.78
Solyc00g007070	65.4	67.32	46.67	59.71	66.53	55.25	66.15	51.4	54.31	59.41
Solyc00g007080	25.11	2.44	1.6	1.31	9.26	3.31	1.68	1.69	0.06	0.19
Solyc00g007090	19.69	10.45	12.91	10.88	17.16	9.65	11.56	7.98	6.73	7.87
Solyc00g007100	34.34	32.5	7.78	37.81	8.62	10.95	8.91	15.68	10.06	9.61
Solyc00g007110	2.23	1.72	1.7	7.48	3.04	4.98	3.58	5.06	1.76	2.95
Solyc00g007120	2.84	2.35	2.4	7.86	4.5	6.66	4.27	6.55	2.73	3.54
Solyc00g007130	0.89	1.04	0.98	0.24	0.36	0.71	0.43	0.43	0.44	0.73
Solyc00g007140	0	0	0	0.16	0	0	0	0	0	0.12
Solyc00g007150	2.64	3.6	1.5	9.4	2.07	4.82	3.01	4.34	3.45	3.56
Solyc00g007160	0.09	0.1	0	0	0	0.13	0	0	0	0.08
Solyc00g007170	0	0.37	0	0.19	0	0	0	0	0.17	0
Solyc00g007180	0	0	0	0	0	0	0	0	0	0
Solyc00g007190	5.15	0.3	0.23	0.55	0.44	0.61	0.36	0.72	0.35	0.47
Solyc00g007200	6.17	6.17	3.6	18.84	0.55	0.18	0.06	0.13	0.05	0.02
Solyc00g007210	0	0	0	0	0	0	0	0	0	0
Solyc00g007220	6.51	3.38	1.32	1.56	0.87	0.62	2.04	8.09	17.27	19.17
Solyc00g007230	0	0	0	0	0	0	0	0	0	0
Solyc00g007240	0	0	0	0	0	0	0	0	0	0
Solyc00g007250	0	0	0	0	0	0	0	0	0	0
Solyc00g007260	6.32	5.37	4.91	6.02	8.14	7.88	7.69	4.68	3.92	3.98
Solyc00g007270	147.45	174.12	172.43	182.38	176.83	175.76	274.5	275.27	206.8	126.93
Solyc00g007290	0.13	0	0	0	0	0	0	0	0	0
Solyc00g007300	4.47	7.93	3.81	5.33	3.29	5.89	8.01	7.59	4.54	9.5
Solyc00g007310	0	0	0	0	0	0	0	0	0	0
Solyc00g007320	0	0	0	0	0	0	0	0	0	0
Solyc00g007330	0	0	0	0	0	0	0	0	0	0
Solyc00g007340	0	0	0	0	0	0	0	0	0	0
Solyc00g007350	0.05	0	0	0	0	0	0	0	0	0
Solyc00g007450	0	0	0	0	0	0	0	0	0	0
Solyc00g007550	0	0	0	0.92	0.54	2.92	1.33	0.59	0.42	0.36
Solyc00g007560	0.09	0.06	0.06	0	0	0	0.22	0.06	0	0
Solyc00g007570	0	0	0.86	0.67	0.26	0	0	0	0	0
Solyc00g007580	0	0	0	0	0	0	0	0	0	0
Solyc00g007590	0	0	0	0	0	0	0	0	0	0
Solyc00g007600	0.17	0.2	0.3	0.2	0.12	0.54	0.3	0.46	0.09	0.08
Solyc00g007610	0	0	0	0	0	0	0	0	0	0
Solyc00g007910	0	0	0	0	0	0	0	0	0	0
Solyc00g007920	0	0	0	0	0	0	0	0	0	0
Solyc00g007930	0	0	0	0	0	0	0	0	0	0
Solyc00g007940	0	0	0	0	0	0	0	0	0	0
Solyc00g007950	0	0	0	0	0	0	0	0	0	0
Solyc00g007960	0	0	0	0	0	0	0	0	0	0
Solyc00g007970	0	0	0	0	0	0	0	0	0	0
Solyc00g007980	0	0	0	0	0	0	0	0	0	0
Solyc00g007990	0	0	0	0	0	0	0	0	0	0
Solyc00g008000	0	0	0	0	0	0	0	0	0	0
Solyc00g008010	0	0	0	0	0	0	0	0	0	0
Solyc00g008020	0	0	0	0	0	0	0	0	0	0
Solyc00g008030	0	0	0	0	0	0	0	0	0	0
Solyc00g008040	0	0	0	0	0	0	0	0	0	0
Solyc00g008050	0	0	0	0	0	0	0	0	0	0
Solyc00g008060	0	0	0	0	0	0	0	0	0	0
Solyc00g008070	0	0	0	0	0	0	0	0	0	0
Solyc00g008080	0	0	0	0	0	0	0	0	0	0
Solyc00g008090	0	0	0	0	0	0	0	0	0	0
Solyc00g008100	0	0	0	0	0	0	0	0	0	0
Solyc00g008110	0	0	0	0	0	0	0	0	0	0
Solyc00g008120	0	0	0	0	0	0	0	0	0	0
Solyc00g008130	0	0	0	0	0	0	0	0	0	0
Solyc00g008140	0	0	0	0	0	0	0	0	0	0
Solyc00g008150	0	0	0	0	0	0	0	0	0	0
Solyc00g008160	0	0	0	0	0	0	0	0	0	0
Solyc00g008260	0	0	0	0	0	0	0	0	0	0
Solyc00g008270	0	0	0	0	0	0	0	0	0	0
Solyc00g008570	0	0	0	0	0	0	0.32	0	0	0
Solyc00g008580	0	0	0	0	0	0	0	0	0	0
Solyc00g008680	49.16	52.27	46.72	102.71	80.64	85.75	80.86	63.28	81.56	69.86
Solyc00g008690	0	0	0	0	0	0	0	0	0	0
Solyc00g008800	0	0	0	0	0	0	0	0	0	0
Solyc00g008900	0	0	0	0	0	0	0	0	0	0
Solyc00g008910	0	0	0	0	0	0	0	0	0	0
Solyc00g008920	0	0	0	0	0	0	0	0	0	0
Solyc00g009020	125.08	100.34	59.16	137.93	197.38	158.54	145.11	97.09	72.55	73.16
Solyc00g009030	0.37	0.05	0	0	0.05	0	0.04	0	0	0
Solyc00g009040	8.39	1.92	0	0.07	0.11	0.25	0.27	0	0	0
Solyc00g009050	0.75	0.14	0.05	0.42	1.69	0.35	0.23	0.36	0.05	0
Solyc00g009060	17	13.28	12.42	17.17	11.28	10.29	12.49	25.34	22.21	27.95
Solyc00g009070	23.88	0	0	3.57	0	0	0	0	0	0
Solyc00g009080	19.18	8.42	12.2	9.9	28.69	24.86	9.43	11.19	6.86	11.7
Solyc00g009090	0.18	0.55	0.23	3.71	0	0.02	0	0	0	0
Solyc00g009100	7.3	10.07	33.25	3.85	12.59	8.89	6.24	6.69	8.34	8.25
Solyc00g009110	8.89	18.41	15.89	23.29	2.79	4.5	8.1	9.56	2.12	2.34
Solyc00g009120	19.3	36.06	24.45	26.62	4.6	8.12	8.41	11.34	6.2	8.98
Solyc00g009130	2.36	3.69	1.5	1.22	0.89	0.95	0.83	1.18	0.56	2.34
Solyc00g009140	29.2	32.69	13.15	6.49	10.85	13.98	7.67	15.13	15.33	36.03
Solyc00g009240	0	0	0	0	0	0	0	0	0	0
Solyc00g009440	0	0.28	0	0	0	0	0	0	0	0.85
Solyc00g009540	0	0	0	0	0	0	0	0	0	0
Solyc00g009650	0	0	0	0	0	0	0	0	0	0
Solyc00g009660	0	0	0	0	0	0	0	0	0	0
Solyc00g009760	0	0.32	0	0	0.13	0	0	0	0	0
Solyc00g009770	0	0	0	0	0	0	0	0	0	0
Solyc00g009780	0	0	0	0	0	0	0	0	0	0
Solyc00g009790	0	0	0	0	0	0	0	0	0	0
Solyc00g009800	0	0	0	0	0	0	0	0	0	0
Solyc00g010100	0	0	0	0	0	0	0	0	0	0
Solyc00g010110	0	0	0	0	0	0	0	0	0	0
Solyc00g010210	0	0	0	0	0	0	0	0	0	0
Solyc00g010410	0	0	0	0	0	0	0	0	0	0
Solyc00g010420	0	0	0	0	0	0	0	0	0	0
Solyc00g010520	0	0	0	0	0	0	0	0	0	0
Solyc00g010530	0	0	0	0	0	0	0	0	0	0
Solyc00g010540	0	0.05	0	0.05	0	0.07	0	0	0.05	0
Solyc00g010550	0	0	0	0	0	0	0	0	0	0
Solyc00g010750	0.72	0.45	0.66	1.46	0.72	1.22	1.92	1.24	1.14	1.05
Solyc00g010760	0	0	0	0	0	0	0	0.1	0.07	0.06
Solyc00g010770	2.68	0.92	0.14	0	0.09	0.09	0.14	0.34	0	0.16
Solyc00g010780	0	0	0	0	0	0	0	0	0	0
Solyc00g010790	0	0	0	0	0	0	0	0	0	0
Solyc00g010810	0	0	0	0	0	0	0	0	0	0
Solyc00g010930	0	0	0	0	0	0	0	0	0	0
Solyc00g011130	0	0	0	0	0	0	0	0	0	0
Solyc00g011140	0	0	0	0	0	0	0	0	0	0
Solyc00g011150	0	0	0	0	0	0	0	0	0	0
Solyc00g011160	0	0	0	0	0	0	0	0	0	0
Solyc00g011170	0	0	0	0	0	0	0	0	0	0
Solyc00g011180	0	0	0	0	0	0	0	0	0	0
Solyc00g011310	0	0	0	0	0	0	0	0	0	0
Solyc00g011550	0	0	0	0	0	0	0.09	0	0	0
Solyc00g011560	0	0	0	0.09	0	0	0.27	0	0.09	0.14
Solyc00g011660	0	0	0	0	0.07	0	0.21	0	0	0
Solyc00g011670	0	0	0	0	0	0	0	0	0	0
Solyc00g011870	0	0	0	0	0	0	0	0	0	0
Solyc00g011880	11.86	7.46	9.3	7.24	9.95	7.73	6.29	8.58	7.44	3.6
Solyc00g011890	44.67	109.22	13.97	12.08	16.02	19.63	41.63	38.3	80.93	83.61
Solyc00g012090	0	0	0	0	0	0	0	0	0	0
Solyc00g012310	0	0	0	0	0	0	0	0	0	0
Solyc00g012430	0	0	0	0	0	0	0	0	0	0
Solyc00g012440	0	0	0	0	0	0	0	0	0	0
Solyc00g012540	0.04	0	0	0	0	0	0	0	0	0
Solyc00g012640	0	0	0	0	0	0	0	0	0	0
Solyc00g012650	0	0	0	0	0	0	0	0	0	0
Solyc00g012660	0	0	0	0	0	0	0	0	0	0
Solyc00g012670	0	0	0	0	0	0	0	0	0	0
Solyc00g012680	0	0	0	0	0	0	0	0	0	0
Solyc00g012690	0	0	0	0	0	0	0	0	0	0
Solyc00g012700	0	0	0	0	0	0	0	0	0	0
Solyc00g012800	0	0	0	0	0	0	0	0	0	0
Solyc00g012900	0	0	0	0	0	0	0	0	0	0
Solyc00g013000	0	0	0	0	0	0	0	0	0	0
Solyc00g013100	0	0	0	0	0	0	0	0	0	0
Solyc00g013110	0	0	0	0.19	0	0.24	0.37	0.21	0.18	0
Solyc00g013120	1.14	3.16	3.06	13.6	2.7	4.72	2.73	8.2	7.97	5.35
Solyc00g013130	2.22	5.35	2.14	18.47	5.11	13.99	20.66	17.25	21.88	15.51
Solyc00g013140	1.94	2.29	0.74	4.29	2.41	5.58	8.79	3.25	6.54	3.98
Solyc00g013150	0	0	0	0	0.21	0.43	0	0	0	0
Solyc00g013160	0.68	2.26	2.1	10.08	1.16	3.36	3.93	9.31	11	9.86
Solyc00g013170	0	0	0	0	0	0	0	0	0	0.57
Solyc00g013180	0.41	1.14	0.56	1.55	0.67	2.48	7.48	0.21	0.63	0.8
Solyc00g013190	0.15	0.49	0.65	1	0.39	0.88	5.62	0.39	0.62	0.38
Solyc00g013320	0	0	0	0	0	0	0	0	0	0
Solyc00g013330	0	0	0	0	0	0	0	0	0	0
Solyc00g013770	0	0	0	0	0	0	0	0	0	0
Solyc00g014170	0	0	0	0	0	0	0	0	0	0
Solyc00g014180	0	0	0	0	0	0	0	0	0	0
Solyc00g014190	0	0	0	0	0	0	0	0	0	0
Solyc00g014290	0	0	0	0	0	0	0	0	0	0
Solyc00g014390	0	0	0	0	0	0	0	0	0	0
Solyc00g014790	0.05	0.24	0.12	0.85	0.14	1.04	0.58	1.03	1.17	2.37
Solyc00g014800	0.09	0.11	0.1	0.32	0	0.15	0.2	0.14	0.48	0.4
Solyc00g014810	0	0	0	0	0	0	0.3	0	0.29	0.24
Solyc00g014820	0.06	0.07	0	0.22	0	0.11	0.28	0.16	0.13	0.33
Solyc00g014830	4.56	8.95	5.38	14.83	8.43	13.15	19.49	8.79	16.24	11.41
Solyc00g014840	0.13	0.15	0	0.15	0.18	0.19	0.29	0.16	0	0.34
Solyc00g014850	0.7	1.13	0.94	0.99	0.77	4.1	8.97	0.63	0.61	0.99
Solyc00g014860	0	0	0	0.22	0	0	0.21	0	0	0
Solyc00g014960	0	0	0	0	0	0	0	0	0	0
Solyc00g014970	0	0	0	0	0	0	0	0	0	0
Solyc00g014980	0	0	0	0	0	0	0	0	0	0
Solyc00g014990	0	0	0	0	0	0	0	0	0	0
Solyc00g015000	0	0	0	0	0	0	0	0	0	0
Solyc00g015600	0	0	0	0	0	0	0	0	0	0
Solyc00g015610	0	0	0	0	0	0	0	0	0	0
Solyc00g015720	0	0	0	0	0	0	0	0	0	0
Solyc00g015730	0	0	0	0	0	0	0	0	0	0
Solyc00g015740	0	0	0	0	0	0	0	0	0	0
Solyc00g015750	0	0	0	0	0	0	0	0	0	0
Solyc00g015760	0	0	0	0	0	0	0	0	0	0
Solyc00g015770	0	0	0	0	0	0	0	0	0	0
Solyc00g016470	0	0	0	0	0	0	0	0	0	0
Solyc00g016480	0	0	0	0	0	0	0	0	0	0
Solyc00g016490	0	0	0	0	0	0	0	0	0	0
Solyc00g016590	0	0	0	0	0	0	0	0	0	0
Solyc00g016790	0	0	0	0	0	0	0	0	0	0
Solyc00g016890	0	0	0	0	0	0	0	0	0	0
Solyc00g016900	0	0	0	0	0	0	0	0	0	0
Solyc00g016910	0	0	0	0	0	0	0	0	0	0
Solyc00g017210	0.04	0	0	0	0	0	0	0	0	0
Solyc00g017220	0	0	0	0	0	0	0	0	0	0
Solyc00g017230	0	0	0	0	0	0	0	0	0	0
Solyc00g017530	0	0	0	0	0	0	0	0	0	0
Solyc00g017540	0	0	0	0	0	0	0	0	0	0
Solyc00g017550	0	0	0	0	0	0	0	0	0	0
Solyc00g017750	0	0	0	0	0	0	0	0	0	0
Solyc00g017760	0	0	0	0	0	0	0	0	0	0
Solyc00g017860	0	0	0	0	0	0	0	0	0	0
Solyc00g017870	0	0	0	0	0	0	0	0	0	0
Solyc00g017880	0	0	0	0	0	0	0	0	0	0
Solyc00g017890	0	0	0	0	0	0	0	0	0	0
Solyc00g017900	0	0	0	0	0	0	0	0	0	0
Solyc00g017910	0	0	0	0	0	0	0	0	0	0
Solyc00g017920	0	0	0	0	0	0	0	0	0	0
Solyc00g017930	0	0	0	0	0	0	0	0	0	0
Solyc00g018760	0	0	0	0	0	0	0	0	0	0
Solyc00g018770	0	0	0	0	0	0	0	0	0	0
Solyc00g018970	0	0	0	0	0	0	0	0	0	0
Solyc00g019610	0	0	0	0	0	0	0	0	0	0
Solyc00g019620	0	0	0	0	0	0	0	0	0	0
Solyc00g019630	0	0	0	0	0	0	0	0	0	0
Solyc00g019730	0.3	1.49	0	0.7	1.49	4.54	8.46	0.49	0.54	1.5
Solyc00g019740	1.92	1.82	0.42	3.81	2.03	14.11	15.12	1.71	1	2.72
Solyc00g019750	1.04	0.48	0.46	1.22	1.42	2.92	7.95	0.58	0.45	1.48
Solyc00g019950	0.68	0.61	0	1.61	0.63	3.59	5.14	0.12	0.41	0.48
Solyc00g019960	0	0.44	0	0.22	0.26	1.36	0.43	0	0.42	0.17
Solyc00g019970	0.19	0	0.11	0	0.07	1.59	0.16	0	0	0.09
Solyc00g019980	0	0	0.06	0	0.14	0.24	0.06	0	0	0.13
Solyc00g019990	0	0	0	0	0	0	0	0.25	0.22	0.18
Solyc00g020000	0	0	0	0.3	0.35	0	0	0.31	0	0.23
Solyc00g020010	0.57	0.89	0	0.68	0.26	0.91	0.22	1.29	1.86	2.04
Solyc00g020020	0.05	0.06	0	0.18	0.14	0.17	0.4	0	0.06	0.09
Solyc00g020030	0	0.5	0.25	0.77	1.19	1.44	1.23	1.14	0.46	1.35
Solyc00g020040	0	0.41	0.08	0.16	0.19	0.1	0.24	0	0.23	0.82
Solyc00g020440	0	0	0	0	0	0	0	0	0	0
Solyc00g020540	0	0.07	0.03	0	0.03	0	0	0	0	0
Solyc00g020840	0.11	0.07	0	0.13	0	0.1	0	0	0.06	0.15
Solyc00g020940	0	0	0	0	0	0	0	0	0	0
Solyc00g020950	0	0	0	0	0	0	0	0	0	0
Solyc00g020960	0	0	0	0	0	0	0	0	0	0
Solyc00g020970	0	0	0	0	0	0	0	0	0	0
Solyc00g020980	0	0	0	0	0	0	0	0	0	0
Solyc00g020990	0	0	0	0	0	0	0	0	0	0
Solyc00g021490	0	0	0	0	0	0	0	0	0	0
Solyc00g021500	0	0	0	0	0	0	0	0	0	0
Solyc00g021510	0	0	0	0	0	0	0	0	0	0
Solyc00g021520	0	0	0	0	0	0	0	0	0	0
Solyc00g021530	0	0	0	0	0	0	0	0	0	0
Solyc00g021630	1.06	1.53	0.38	0.86	1.55	4.91	4.58	0.37	0.43	1.19
Solyc00g021640	0.43	0.91	0.42	0.92	1.94	5.27	5.48	1.04	0.88	1.83
Solyc00g021650	0	0	0	0	0	0	0.22	0	0	11.95
Solyc00g021660	0	0	0	0	0	0	0	0	0	0
Solyc00g022070	0	0	0	0	0.39	0.47	0.64	0.36	0.62	0
Solyc00g022080	0	0	0	0	0.28	0	0	0	0	0
Solyc00g022090	0	0	0	0	0	0.18	0.42	0	0	0.11
Solyc00g022100	1.89	3.25	2.34	5.76	1.37	6.22	7.68	1.8	1.78	3.87
Solyc00g022110	4.06	12.91	4.76	18.72	5.71	12.83	17.14	13	33.62	65.43
Solyc00g022920	0	0	0	0	0	0	0	0	0	0
Solyc00g023020	0	0	0	0	0	0	0	0	0	0
Solyc00g023030	0	0	0	0	0	0	0	0	0	0
Solyc00g023040	0	0	0	0	0	0	0	0	0	0
Solyc00g023050	0	0	0	0	0	0	0	0	0	0
Solyc00g023250	0	0	0	0	0	0	0	0	0	0
Solyc00g023260	0	0	0	0	0	0	0	0	0	0
Solyc00g023270	0	0	0	0	0	0	0	0	0	0
Solyc00g023470	0	0	0	0	0	0	0	0	0	0
Solyc00g023570	0	0	0	0	0	0	0	0	0	0
Solyc00g023580	0	0	0	0	0.23	0.28	0.38	0.26	0	0
Solyc00g023590	0.04	0	0.09	0.05	0.06	0.06	0	0	0	0.07
Solyc00g023600	0	0	0	0	0	0	0	0	0	0
Solyc00g023700	0.07	0.42	0.08	0	0.3	0	0.17	0.09	0	0.19
Solyc00g023710	0	0	0	0	0.09	0.11	0.07	0	0	0.11
Solyc00g024010	0	0	0	0	0	0	0	0	0	0
Solyc00g024020	0	0	0	0	0	0	0	0	0	0
Solyc00g024030	0	0	0	0	0	0	0	0	0	0
Solyc00g024040	0	0	0	0	0	0	0	0	0	0
Solyc00g024050	0	0	0	0	0	0	0	0	0	0
Solyc00g024150	75.48	151.14	315.39	6.01	49.35	51.75	30.49	42.93	76.31	53.72
Solyc00g024160	0	0.06	0	0	0	0	0	0	0	0.19
Solyc00g024170	0	0.16	0	0	0	0	0	0	0	0
Solyc00g024370	0	0	0	0	0	0	0	0	0	0
Solyc00g024570	0.03	0	0	0	0	0	0	0	0	0
Solyc00g024670	0	0	0	0	0	0	0	0	0	0
Solyc00g024680	0	0	0	0	0	0	0	0	0	0
Solyc00g024690	0	0	0	0	0	0	0	0	0	0
Solyc00g025290	9.14	10.05	9.84	13.9	8.83	9.55	15.45	9.19	27.75	14.78
Solyc00g025300	0	0	0	0	0	0	0	0	0	0
Solyc00g025400	0	0	0	0.07	0	0	0.07	0	0.13	0.16
Solyc00g025500	0	0	0	0	0	0	0	0	0	0
Solyc00g025510	0	0	0	0	0	0	0	0	0	0
Solyc00g025520	0	0	0	0	0	0	0	0	0	0
Solyc00g025530	0	0	0	0	0	0	0	0	0	0
Solyc00g025540	0	0	0	0	0	0	0	0	0	0
Solyc00g025650	0	0	0	0	0	0	0	0	0	0
Solyc00g025660	0	0	0	0	0	0	0	0	0	0
Solyc00g026160	0.05	0.12	0	0.73	0	0	0	0	0.03	0.03
Solyc00g026860	0	0	0	0	0	0	0	0	0	0
Solyc00g026870	0	0	0	0	0	0	0	0	0	0
Solyc00g026880	0	0	0	0	0	0	0	0	0	0
Solyc00g026890	0	0	0	0	0	0	0	0	0	0
Solyc00g026900	0	0	0	0	0	0	0	0	0	0
Solyc00g027120	0.05	0	0	0	0	0	0	0	0	0
Solyc00g027130	0.71	0.14	0	0	0.06	0.07	0.05	0.06	0	0.42
Solyc00g027140	0.15	0.03	0.03	0.15	0	0.04	0.09	0	0.05	0.18
Solyc00g027640	0	0	0	0	0	0	0	0	0	0
Solyc00g027650	0	0	0	0	0	0	0	0	0	0
Solyc00g027660	0	0	0	0	0	0	0	0	0	0
Solyc00g027670	0	0	0	0	0	0	0	0	0	0
Solyc00g027770	18.05	21.97	9.86	21.08	24.51	29.18	46.02	36.4	26.62	32.22
Solyc00g027870	0	0	0	0	0	0	0	0	0	0
Solyc00g027970	0	0	0	0	0	0	0	0	0	0
Solyc00g027980	0	0	0	0	0	0	0	0	0	0
Solyc00g027990	0	0	0	0	0	0	0	0	0	0
Solyc00g028090	0	0	0	0	0	0	0	0	0	0
Solyc00g028100	0	0	0	0	0	0	0	0	0	0
Solyc00g028110	0	0	0	0	0	0	0	0	0	0
Solyc00g028120	0	0	0	0	0	0	0	0	0	0
Solyc00g028420	0	0	0	0	0	0	0	0	0	0
Solyc00g028520	0	0	0	0	0	0	0	0	0	0
Solyc00g028530	0	0	0	0	0	0	0	0	0	0
Solyc00g028540	0	0	0	0	0	0	0	0	0	0
Solyc00g028550	0	0	0	0	0	0	0	0	0	0
Solyc00g028560	0	0	0	0	0	0	0	0	0	0
Solyc00g028760	0	0	0	0	0	0	0	0	0	0
Solyc00g028960	2.22	0	0.32	0.17	0	0	0	0	0	0
Solyc00g029060	0	0	0	0	0	0	0	0	0	0
Solyc00g029070	0	0	0	0	0	0	0	0	0	0
Solyc00g029080	0	0	0	0	0	0	0	0	0	0
Solyc00g029090	0	0	0	0	0	0	0	0	0	0
Solyc00g029190	3.29	2.1	1.48	1.42	0.05	0.11	0.09	0.1	0	0
Solyc00g029290	0	0	0	0	0	0	0	0	0	0
Solyc00g029300	0	0	0	0	0	0	0	0	0	0
Solyc00g029500	0	0	0	0	0	0	0	0	0	0
Solyc00g029800	0	0	0	0	0	0	0	0	0	0
Solyc00g030000	0.06	0.2	0	0.21	0	0	0	0	0	0
Solyc00g030100	0	0	0	0	0.35	0	0	0	0	0
Solyc00g030110	0	0	0	0	0	0	0	0	0	0
Solyc00g030210	0	0	0	0	0	0	0	0	0	0
Solyc00g030510	900.69	1009.15	0.36	2.08	1.04	0.53	3.67	1.3	0.44	0
Solyc00g030520	10.46	8.74	3.25	5.08	10.64	7.17	7.13	6.05	3.56	5.22
Solyc00g030820	0.13	0.3	0.43	0.15	0	0.19	0.15	0.16	0.14	0.23
Solyc00g031020	0	0	0	0	0	0	0	0	0	0
Solyc00g031030	0	0	0	0	0	0	0	0	0	0
Solyc00g031040	0	0	0	0	0	0	0	0	0	0
Solyc00g031050	0	0	0	0	0	0	0	0	0	0
Solyc00g031060	0	0	0	0	0	0	0	0	0	0
Solyc00g031360	0	0	0	0	0	0	0	0	0	0
Solyc00g031370	0	0	0	0	0	0	0	0	0	0
Solyc00g031380	0	0	0	0	0	0	0	0	0	0
Solyc00g031390	0	0	0	0	0	0	0	0	0	0
Solyc00g031490	0	0	0	0	0	0	0	0	0	0
Solyc00g031500	0	0	0	0	0	0	0	0	0	0
Solyc00g031700	0	0	0	0	0	0	0	0	0	0
Solyc00g031710	0	0	0	0	0	0	0	0	0	0
Solyc00g031720	0	0	0	0	0	0	0	0	0	0
Solyc00g031730	0	0	0	0	0	0	0	0	0	0
Solyc00g032030	0.87	1.36	0	0.69	0.27	0.14	1	1.67	1.06	1.4
Solyc00g032230	0	0	0	0	0	0	0	0	0	0
Solyc00g032940	0	0	0	0	0	0	0	0	0	0
Solyc00g033460	14.97	4.1	0.99	0	5.41	1.15	0.13	0.17	0	0
Solyc00g033860	0	0	0	0	0	0	0	0	0	0
Solyc00g033870	0	0	0	0	0	0	0	0	0	0
Solyc00g033880	0	0	0	0	0	0	0	0	0	0
Solyc00g033890	0	0	0	0	0	0	0	0	0	0
Solyc00g033990	0	0	0	0	0	0	0	0	0	0
Solyc00g034000	0	0	0	0	0	0	0	0	0	0
Solyc00g034010	0	0	0	0	0	0	0	0	0	0
Solyc00g034810	0	0	0	0.23	0	0	0	0	0	0
Solyc00g035010	0	0	0	0	0	0	0	0	0	0
Solyc00g035020	0	0	0	0	0	0	0	0	0	0
Solyc00g036320	0.28	0.16	0	0	0	0	0	0	0	0
Solyc00g036520	0	0.18	0	0	0	0	0	0.1	0.09	0.56
Solyc00g036530	0	0	0	0	0	0	0	0	0	0
Solyc00g036540	3.52	5.36	5.55	0.91	3.17	15.85	21.24	5.65	4.86	13.33
Solyc00g036740	0	0	0	0	0	0	0	0	0	0
Solyc00g036750	0	0	0	0	0	0	0	0	0	0
Solyc00g036760	0	0	0	0	0	0	0	0	0	0
Solyc00g036960	0	0	0	0	0	0	0.11	0	0	0
Solyc00g038390	0	0	0	0	0	0	0	0	0	0
Solyc00g039290	0.05	0	0	0	0.07	0	0	0	0	0
Solyc00g039990	5.27	6.92	5.29	5.07	6.17	5.83	6.83	7.22	3.77	8.84
Solyc00g040290	0	0	0	7.59	0	0	0	0	0	0
Solyc00g040390	0	0	0	5.07	0	0	0	0	0	0
Solyc00g040490	0	0	0	0	0	0	0	0	0	0
Solyc00g041090	0.15	0.17	0	0	0	0	0	0	0	0
Solyc00g041190	0	0	0	0	0	0	0	0	0	0
Solyc00g041200	0	0	0	0	0	0	0	0	0	0
Solyc00g041210	0	0	0	0	0	0	0	0	0	0
Solyc00g041220	0	0	0	0	0	0	0	0	0	0
Solyc00g042120	0	0	0	0	0	0	0	0	0	0
Solyc00g042130	0	0	0	0	0	0	0	0	0	0
Solyc00g042140	0	0	0	0	0	0	0	0	0	0
Solyc00g042640	0.06	0.11	0.05	0	0.06	0	0.07	0.03	0	0.02
Solyc00g042840	0.99	0.62	0.26	2.7	2.2	3.59	3.76	1.23	1	0.1
Solyc00g042850	0.07	0.08	0	0.08	0	0	0	0	0	0.07
Solyc00g044350	17.91	8.05	43.07	0	2.22	0.9	0.67	0.85	0.19	0
Solyc00g044550	0	0.29	0.29	0	0	0	0.28	0	0	0
Solyc00g044750	1.23	0.26	0.08	0	0.1	0.24	0	0.47	0.16	1.03
Solyc00g045570	0.06	0	0.06	5.94	0.51	0.42	0.12	0.38	0.63	13.23
Solyc00g046570	0.08	0	0.09	0.28	0	0.13	0.36	0	0.09	0.14
Solyc00g046580	0.13	0.08	0	0.04	0.05	0	0	0.1	0	0.03
Solyc00g046980	0	0	0	0	0	0	0	0	0	0
Solyc00g047180	0	1.57	0	0.6	0	0.25	0	0	0	0
Solyc00g047190	0	0	0	0	0	0	0	0	0	0
Solyc00g047200	2.19	2.8	0.21	5.03	3.57	7.43	11.97	1.78	2.43	3.97
Solyc00g047700	229.8	235.66	151	241	493.65	256.52	168.51	185.48	203.18	196.67
Solyc00g047810	0.24	0	0	0	0	0.2	0.68	0	0.39	0.76
Solyc00g048410	0	0.24	0	0	0	0	0	0	0	0
Solyc00g048510	0.15	0.52	0.67	2.55	3.06	2.32	0.17	0.53	1.13	0.67
Solyc00g049210	0.15	0.23	0.11	0.41	0.37	1.28	2.36	0.04	0.13	0.46
Solyc00g049220	0	0	0	0	0.29	0	0.24	0	0	0
Solyc00g049520	25.47	10.24	22.99	78.38	16.29	44.38	61.16	115.98	110.9	28.07
Solyc00g049620	0	0	0	0	0	0	0	0	0	0
Solyc00g049920	0	0	0	0	0	0	0	0	0	0
Solyc00g050020	0	0	0	0	0	0	0	0	0	0
Solyc00g050030	0	0	0	0	0	0	0	0	0	0
Solyc00g050130	5.12	5	6.96	25.17	8.66	6.99	5.93	7.23	2.94	5.26
Solyc00g050430	4.84	4.1	0.89	22.58	53.51	41.2	9.22	2.22	0.21	0.06
Solyc00g052430	0.56	1.06	1.11	2.16	0.72	0.87	1.31	0.5	0.61	1.37
Solyc00g052530	0	0.13	0	0.26	0	0.16	0.25	0	0	0.6
Solyc00g052540	0.14	0	0	0	0	0	0	0	0	0.13
Solyc00g052940	12.31	6.4	1.85	2.47	0.11	0.07	0	0	0	0
Solyc00g053440	15.76	13.7	12.7	28.07	23.09	18.45	20.65	46.56	41.98	124.39
Solyc00g053740	0.13	0	0	0	0	0	0	0	0	0
Solyc00g055940	0	0	0	0	0	0	0	0	0	0
Solyc00g055950	0	0	0	0	0	0	0	0	0	0
Solyc00g055960	0	0	0	0	0	0	0	0	0	0
Solyc00g055970	0	0	0	0	0	0	0	0	0	0
Solyc00g055980	0	0	0	0	0	0	0	0	0	0
Solyc00g056180	0	0	0	0	0	0	0	0	0	0
Solyc00g056680	0.43	0.47	0.49	1.02	1.29	1.42	1.28	0.94	1.26	2.73
Solyc00g057280	0.09	0	0	0	0	0	0	0	0	0
Solyc00g057880	9.96	8.19	9.91	8.34	15.66	14.17	14.89	13.48	8.5	7.95
Solyc00g058280	0	0.72	0	0	0	0	0	0	0	0
Solyc00g058480	0	0	0	0	0	0	0	0	0	0
Solyc00g058490	0.25	0.18	0.11	0	0.07	0.34	0.06	0.2	0.06	0.14
Solyc00g058890	6.41	13.11	52.41	20.55	0	0	0	0	0	0
Solyc00g058900	3.16	0	0	0	0	0	0	0	0	0
Solyc00g059100	3.31	2.21	0.78	7.7	2.72	4.65	4.97	3.86	3.77	4.59
Solyc00g059500	25.84	34.12	15.44	27.8	26.39	18.03	25.66	27.62	24.99	23.16
Solyc00g060700	0	0	0	0	0	0	0	0	0	0
Solyc00g060710	0	0	0	0	0	0	0	0	0	0
Solyc00g060810	0	0	0.06	0	0	0.09	0.06	6.17	18.48	374.86
Solyc00g062710	0	0	0	0	0.2	0	0	0	0	0
Solyc00g063110	0	0	0	14.15	0	0	0	0	0	0
Solyc00g063510	0	0	0	0	0	0	0	0	0	0
Solyc00g065510	0	0	0	0	0	0	0	0	0	0
Solyc00g065610	0	0	0	0	0	0	0	0	0	0
Solyc00g065620	0	0	0	0	0	0	0	0	0	0
Solyc00g065630	0	0	0	0	0	0	0	0	0	0
Solyc00g065930	0	0	0	0	0	0	0	0	0	0
Solyc00g065940	0	0	0	0	0	0	0	0	0	0
Solyc00g066140	0	0	0	0	0	0	0	0	0	0
Solyc00g066150	0	0	0	0	0	0	0	0	0	0
Solyc00g066350	2.79	0	0	0	0	0	0	0	0	0
Solyc00g066360	2.74	0	0	0	0	0	0	0	0	0
Solyc00g066370	0	0	0	0	0	0	0	0	0	0
Solyc00g067470	3.4	2.76	1.78	4.34	3.62	2.08	5.95	2.91	4.3	1.86
Solyc00g068970	0	0	0	0	0	0	0	0	0	0
Solyc00g068980	1.31	3.06	2.36	6.83	5.04	38.96	45.8	3.97	4.86	4.21
Solyc00g069680	0	0	0	0	0	0	0	0	0	0
Solyc00g069880	0.21	0.12	0	0.06	0	0.09	0.12	0.08	0.29	0.47
Solyc00g070680	0	0	0	0	0	0	0	0	0	0
Solyc00g071180	657.22	56.93	0.84	208.39	10.99	18.86	0.53	0.84	0.51	0
Solyc00g071580	0	0	0	0	0	0	0	0	0	0
Solyc00g071590	0	0	0	0	0	0	0	0	0	0
Solyc00g071600	0	0	0	0	0	0	0	0	0	0
Solyc00g072100	23.49	20.74	14.07	16.92	50.97	29.61	25.41	27.73	14.03	9.07
Solyc00g072400	0	0	0.04	766.88	0	0	0	0.05	0	0
Solyc00g072800	0.21	0.48	0	0.24	0.28	0.42	0.23	0.38	0.08	0.61
Solyc00g073200	0	0	0	0	0	0	0	0	0	0
Solyc00g073900	0	0	0	0	0	0	0	0	0	0
Solyc00g073910	0	0	0	0	0	0	0	0	0	0
Solyc00g074210	0	0.23	0	0	0	0.14	0	0.44	0.11	0.17
Solyc00g074810	0	0	0	0	0	0	0	0	0	0
Solyc00g074820	0	0	0	0	0	0	0	0	0	0
Solyc00g074830	0	0	0	0	0	0	0	0	0	0
Solyc00g075030	9.69	88.74	0	0.47	0.06	0	0.05	0	0	0
Solyc00g075040	0.56	1.89	0	0	0	0	0	0	0	0
Solyc00g075440	1.5	0.55	0.65	227.72	0.36	0.08	0	0.08	0	0.09
Solyc00g075450	0.96	2.07	0.62	471.39	0.57	0.46	1.24	3.62	2.39	1.22
Solyc00g076250	0	0	0	0	0	0	0	0	0	0
Solyc00g079050	0	0	0	0	0	0	0	0	0	0
Solyc00g080550	0	0	0	0	0	0	0	0	0	0
Solyc00g080750	4.48	12.76	4.26	0.3	2.21	1.18	1.3	0.3	0.37	0
Solyc00g082150	40.69	33.34	37.6	70.09	68.74	70.05	55.4	68.05	51.7	37.8
Solyc00g082550	0	0	0.97	0.4	0	1.11	0.1	0	0	0
Solyc00g084650	0	0	0	0	0	0	0	0	0	0
Solyc00g084750	0.59	0.63	0.72	0.93	0.74	1.21	0.95	1.01	1.38	1.62
Solyc00g084760	0.82	1.54	0	0.15	0.18	0.47	0.86	0.67	0.61	0.34
Solyc00g084770	0.87	1.53	0	0.17	0.4	0	0.5	1.32	0.8	0.4
Solyc00g084870	2.33	2.53	4.33	1.78	2.8	1.51	2.65	1.89	1.23	0.27
Solyc00g085070	93.42	121.88	49.59	41.33	51.25	55.18	42.2	38.34	36.54	52.43
Solyc00g085370	0	0	0	0	0	0	0	0	0	0
Solyc00g085770	0	0	0	0	0	0	0	0	0	0
Solyc00g085780	0	0	0	0	0	0	0	0	0	0
Solyc00g088080	0	0	0	0	0	0	0	0	0	0
Solyc00g088090	0	0	0	0	0	0	0	0	0	0
Solyc00g088190	0	0	0	0	0	0	0	0	0	0
Solyc00g088200	0	0	0	0	0	0	0	0	0	0
Solyc00g088210	0	0	0	0	0	0	0	0	0	0
Solyc00g090110	0	0	0	0	0	0	0	0	0	0
Solyc00g090120	0	0	0	0	0	0	0	0	0	0
Solyc00g090130	0	0	0	0	0	0	0	0	0	0
Solyc00g090430	0.04	0	0	0.19	0	0.18	0.28	0	0.05	0
Solyc00g090630	0	0	0	0	0	0	0	0	0	0
Solyc00g090640	0	0	0	0	0	0	0	0	0	0
Solyc00g090650	0	0	0	0	0	0	0	0	0	0
Solyc00g090660	0	0	0	0	0	0	0	0	0	0
Solyc00g090860	0	0	0	74.6	0	0	0	0	0	0
Solyc00g090870	22.32	22.86	11.02	15.73	13.79	7.89	5.41	5.49	4.98	4.86
Solyc00g091170	10.69	7.32	16.73	13.79	18.58	12.34	4.8	3.54	1.76	1.31
Solyc00g092870	0	0	0	0	0	0	0	0	0	0
Solyc00g092880	0	0	0	0	0	0	0	0	0	0
Solyc00g092890	0	0	0	0	0	0	0	0	0	0
Solyc00g092900	0	0	0	0.34	0.06	0.18	0.19	0.11	0.05	0.11
Solyc00g093000	4.8	4.38	6.98	13.82	5.69	14.95	5.46	8.98	6.36	6.75
Solyc00g093100	0	0	0	0	0	0	0	0	0	0
Solyc00g093300	0.06	0	0.07	0	0	0	0	0	0	0
Solyc00g093310	0.92	1.98	0.52	0.91	1.06	0	0.7	1.09	0.17	0.14
Solyc00g094010	0	0	0	0	0	0	0	0	0	0
Solyc00g094020	0	0	0	0	0	0	0	0	0	0
Solyc00g094520	1.17	1.6	0	1.38	1.29	0.78	1.59	0.65	0.77	2.08
Solyc00g094530	0.22	0.13	0.13	0.79	0.61	2.89	1.89	0.31	0.25	0.9
Solyc00g094540	0	0	0	0.31	0.55	0.38	0	0.33	0	0
Solyc00g094550	0	0	0	0	0	0	0.21	0	0	0.16
Solyc00g094850	0	0	0	0	0	0	0	0	0	0
Solyc00g095450	0	0	0	0	0	0	0	0	0	0
Solyc00g095460	0	0	0	0	0	0	0	0	0	0
Solyc00g095760	0.48	0.51	0.54	15.64	8.21	1.77	0.59	1.99	0.94	1.47
Solyc00g095860	3.92	7.5	9.01	30.63	15.6	9.54	4.68	33.8	30.85	42.76
Solyc00g096060	0.64	0	0	12.05	0	0	0	0	0	0
Solyc00g096460	8.17	5.69	7.47	10.38	13.95	10.19	8.18	7.73	8.87	14.61
Solyc00g097260	0	0	0	0	0	0	0	0	0	0
Solyc00g097760	0	0	0	0	0	0	0	0	0	0
Solyc00g097960	5.47	5.58	6.97	3.25	6.47	5.46	1.67	3.3	1.92	1.51
Solyc00g098560	9.39	9.83	6.1	23.07	16.79	20.74	45.89	21.82	16.44	5.89
Solyc00g099160	0	0	0	0.15	0	0	0	0	0	0
Solyc00g099460	0	0	0	0	0	0	0	0	0	0
Solyc00g099470	0	0	0	0	0	0	0	0	0	0
Solyc00g099570	0	0	0	0	0	0	0	0	0	0
Solyc00g099580	1.5	0.55	2.19	0	1.21	0.37	0.11	0	0	0
Solyc00g099880	0	0	0	0	0	0	0	0	0	0
Solyc00g100880	0.1	0	0.06	1.32	0	0	0	0	0	0
Solyc00g101700	0	0	0	0	0	0	0	0	0	0
Solyc00g102000	0	0	0	0	0	0	0	0	0	0
Solyc00g102400	0.49	0.29	0.36	10.05	0.42	1.23	1.27	2.68	1.23	0.26
Solyc00g104200	0	0	0	0	0	0	0	0	0	0
Solyc00g104210	0	0	0	0	0	0	0	0	0	0
Solyc00g104310	0	0	0	0	0	0	0	0	0	0
Solyc00g104320	0	0	0	0	0	0	0	0	0	0
Solyc00g104330	0	0	0	0	0	0	0	0	0	0
Solyc00g104630	0	0	0	0	0	0	0	0	0	0
Solyc00g104730	0	0	0	0	0	0	0	0	0	0
Solyc00g104740	0	0	0	0	0	0	0	0	0	0
Solyc00g104940	1.26	0	0	0.12	0	0	0	0	0	0
Solyc00g105340	0.05	0	0.05	0.06	0	0	0	0.07	0	0
Solyc00g105350	0	0	0	0	0	0	0	0	0	0
Solyc00g105750	0.03	0.04	0	0	0	0	0.1	0	0	0
Solyc00g106650	9.4	11.88	10.86	24.12	18.28	20.25	15.93	13.2	8.78	10.3
Solyc00g107050	0	0	0	0	0.14	0	0.12	0	0	0
Solyc00g107550	0	0	0	0	0	0	0	0	0	0
Solyc00g108550	0	0.31	0.1	0.11	0	0.26	0.41	0.11	0	0
Solyc00g109450	0	0	0	0	0	0	0	0	0	0
Solyc00g109850	0	0	0	0	0	0	0	0	0	0
Solyc00g109860	0	0	0	0	0	0	0	0	0	0
Solyc00g110060	0	0	0	0	0	0	0	0	0	0
Solyc00g110070	0	0	0	0	0	0	0	0	0	0
Solyc00g110370	0	0	0	0	0	0	0	1.52	0	0
Solyc00g110870	10.18	12.68	6.83	60.61	7.24	4.23	3.27	0.68	0.13	0.14
Solyc00g111170	0	0	0	0	0	0	0	0	0	0
Solyc00g111270	0	0	0	0	0	0	0	0	0	0
Solyc00g111370	0	0	0	0	0	0	0	0	0	0
Solyc00g111770	0	0	0	0	0	0	0	0	0	0
Solyc00g111780	0	0	0	0	0	0	0	0	0	0
Solyc00g112180	0	0	0	0	0	0	0	0	0	0
Solyc00g112190	0.14	0.33	0.16	0.04	0.05	0.28	0.08	0.05	0	0
Solyc00g112490	0	0	0	0	0	0	0	0	0	0
Solyc00g112500	0	0	0	0	0	0	0	0	0	0
Solyc00g112600	0	0	0	0	0	0	0	0	0	0
Solyc00g112700	0	0	0	0	0	0	0	0	0	0
Solyc00g112710	0	0	0	0	0	0	0	0	0	0
Solyc00g112810	0	0	0	0	0	0	0	0	0	0
Solyc00g112820	0	0	0	0	0	0	0	0	0	0
Solyc00g112830	0	0	0	1.21	0.11	0.23	0	0.44	0	0
Solyc00g112930	0.93	0.16	0.15	13.86	1.1	1.25	1.06	3.46	0	0
Solyc00g113230	0	0	0	0	0	0	0	0	0	0
Solyc00g113330	0	0	0	0	0	0	0	0	0	0
Solyc00g113730	0	0	0	0	0	0	0	0	0	0
Solyc00g113740	0	0	0	0	0	0	0	0	0	0
Solyc00g113750	0	0	0	0	0	0	0	0	0	0
Solyc00g114550	0	0	0	0	0	0	0	0	0	0
Solyc00g116150	0	0	0	0	0	0	0	0	0	0
Solyc00g117450	1.33	1	1.65	0	0.18	0	0	0	0	0
Solyc00g117650	0	0	0	0	0	0	0	0	0	0
Solyc00g118680	0	0	0	0	0	0.14	0.21	0	0.21	0
Solyc00g118690	0.99	0.96	0.37	2.36	1.83	3.66	2.07	1.55	1.81	1.78
Solyc00g120120	0	0	0	0	0	0	0	0	0	0
Solyc00g120820	0	0	0	0	0	0	0	0	0	0
Solyc00g120830	0	0	0	0	0	0	0	0	0	0
Solyc00g120930	0	0	0	0	0	0	0	0	0	0
Solyc00g121230	0	0	0	0	0	0	0	0	0	0
Solyc00g121730	0	0	0	0	0	0	0	0	0	0
Solyc00g122530	0	0	0	0	0	0	0	0	0	0
Solyc00g123030	0	0	0	0	0	0	0	0	0	0
Solyc00g123040	0	0	0	0	0	0	0	0	0	0
Solyc00g123240	0	0	0	0	0	0	0	0	0	0
Solyc00g124840	0	0	0	0	0	0	0	0	0	0
Solyc00g124850	0	0	0	0	0	0	0	0	0	0
Solyc00g124860	0	0	0	0	0	0	0	0	0	0
Solyc00g125260	0	0	0	0	0	0	0	0	0	0
Solyc00g125270	0	0	0	0	0	0	0	0	0	0
Solyc00g125580	0.07	0	0.08	0.08	0	0.1	0	0.1	0	0
Solyc00g125980	1.49	1.49	0.49	10.29	1.17	9.64	10.6	9.91	11.09	8.13
Solyc00g125990	0.8	1.57	0.53	1.67	1.2	2.95	4.57	1.1	1.38	1.68
Solyc00g126000	3.4	7.92	5.11	22.09	14.01	7.07	7.38	17.8	21.22	15.18
Solyc00g126010	1.98	5.77	4.78	27.07	6.51	6.78	5.93	17.74	20.54	11.34
Solyc00g126420	0	0	0	0	0	0	0	0	0	0
Solyc00g126430	0	0	0	0	0	0	0	0	0	0
Solyc00g126440	0	0	0	0	0	0	0	0	0	0
Solyc00g127540	0	0	0	0	0	0	0	0	0	0
Solyc00g127550	0	0	0	0	0	0	0	0	0	0
Solyc00g127560	0	0	0	0	0	0	0	0	0	0
Solyc00g127660	47.89	37.98	27.44	45.5	30.71	26.34	24.69	30.76	31.28	29.86
Solyc00g127670	8.43	5.62	14.24	3.76	7.61	6.29	3.61	6.33	4.56	1.93
Solyc00g127870	90.47	27.72	13.05	20.84	18.08	10.2	4.4	9.87	3.03	2
Solyc00g128870	44.02	60.92	21.56	53.91	61.69	26.81	39.11	34.16	30.29	19.69
Solyc00g129670	0	0	0	0	0	0	0	0	0	0
Solyc00g129680	0	0	0	0	0	0	0	0	0	0
Solyc00g129880	0	0	0	0	0	0	0	0	0	0
Solyc00g129980	0	0	0	0	0	0	0	0	0	0
Solyc00g130180	0	0	0	0	0	0	0	0	0	0
Solyc00g130190	0	0	0	0	0	0	0	0	0	0
Solyc00g130290	0	0	0	0	0	0	0	0	0	0
Solyc00g130690	0	0	0	0	0	0	0	0	0	0
Solyc00g130700	0	0	0	0	0	0	0	0	0	0
Solyc00g130800	0	0	0	0	0	0	0	0	0	0
Solyc00g130810	0	0	0	0	0	0	0	0	0	0
Solyc00g131610	0	0	0	0	0	0	0	0	0	0
Solyc00g131710	0	0	0	0	0	0	0	0	0	0
Solyc00g133110	0	0	0	0	0	0	0	0	0	0
Solyc00g133710	0	0	0	0	0	0	0	0	0	0
Solyc00g133720	0	0	0	0	0	0	0	0	0	0
Solyc00g134620	0	0	0	8.62	0	0	0	0	0	0
Solyc00g134820	0	0	0	0	0	0	0	0	0	0
Solyc00g134830	0	0	0	0	0	0	0	0	0	0
Solyc00g134840	0	0	0	0	0	0	0	0	0	0
Solyc00g135040	0	0	0	0	0	0	0	0	0	0
Solyc00g135050	0	0	0	0	0	0	0	0	0	0
Solyc00g135060	0	0	0	0	0	0	0	0	0	0
Solyc00g135260	0	0	0	8.78	0	0	0	0	0	0
Solyc00g136260	6.5	9.67	9.97	2.99	12.89	43.9	61.52	31.46	15.96	2.07
Solyc00g136560	11.74	62.04	16.45	0.08	0.29	1.29	1.24	1.54	9.04	2.99
Solyc00g138060	0.38	0	0.26	2.06	0	0	0	0	0	0
Solyc00g139760	0	0	0	0	0	0	0	0	0	0
Solyc00g140060	20.02	14.2	32.77	47.31	42.53	50.97	83.37	54.28	38.76	41.04
Solyc00g141360	0	0	0.07	1.34	0.26	0.93	0.21	0.18	0	0
Solyc00g141560	0	0	0.11	0	0	0	0	0	0	0.08
Solyc00g142160	0	0.32	0.15	0.81	0.19	1.19	0.16	0.17	1.34	1.45
Solyc00g142170	0	0.05	0	0.49	0.28	0.68	0.33	0.63	1.81	0.82
Solyc00g143770	10.14	8.85	10	19.25	12.22	10.71	8.82	21.56	23.22	22.86
Solyc00g144470	0	0	0	1.17	0.39	0.48	0.03	0	0.05	3.07
Solyc00g145170	25.95	0.12	0	38.54	5.14	30.65	52.09	8.84	0	0
Solyc00g147570	1.49	0.15	0	0	0	0	0.05	0	0	0
Solyc00g147770	1.31	1.2	0.95	2.12	1.06	0.87	0.88	1.32	0.76	0.98
Solyc00g149970	2.14	2.91	2	167.94	2.03	4.57	3.51	2.48	0.48	0.26
Solyc00g153680	0.67	0.28	0.07	0	0.33	0.29	0.96	0.73	0.34	0.11
Solyc00g153980	0	0	0.29	0	0	0	0	0	0	0
Solyc00g154480	0	0	0.19	0.04	0	0	0	0	0	0
Solyc00g154980	0	0	0	0	0	0	0	0	0	0
Solyc00g156980	13.42	4.5	7.76	0.67	14.35	16.93	8.98	1.34	0	0.15
Solyc00g157080	8.59	15.34	2.06	0	0	0	0.19	0	0	0
Solyc00g157180	0.31	0.98	0	0.18	0.11	0.11	0.13	0.21	0.25	0.14
Solyc00g160780	9.82	1	4.16	0.71	6.61	3.16	1.27	0.67	0	0
Solyc00g163580	0.15	0	0.51	0	0	0	0	0	0	0
Solyc00g164580	0	0	0	0	0	0	0.09	0	0.09	0.58
Solyc00g164680	9.09	25.67	8.85	6.4	6.02	9.53	11.84	9.14	19.85	28.88
Solyc00g165080	0	0	0	0	0	0	0	0	0	0
Solyc00g165090	0	0	0	0	0	0	0	0	0	0
Solyc00g165190	0	0	0	0	0	0	0	0	0	0
Solyc00g166190	0	0	0	0	0	0	0	0	0	0
Solyc00g166490	1.11	0.22	0.13	0	0.06	0	0	0.21	0	0.31
Solyc00g166690	0	0	0	0	0	0	0	0	0	0.07
Solyc00g167290	0	0	0	0	0	0	0	0	0	0
Solyc00g167300	0	0	0	0	0	0	0	0	0	0
Solyc00g167800	0	0	0	0	0	0	0	0	0	0
Solyc00g168200	6.26	4.36	8.51	7.43	7.74	9.16	14.23	1.74	2.76	2.22
Solyc00g170200	49.44	38.83	225	24.53	2.79	1.36	0.51	0.31	0.25	0
Solyc00g170210	10.26	7.27	4.48	13.17	14.61	16.75	16.06	12.91	10.99	14.43
Solyc00g170510	0	0	0	0	0.41	0	0	0	0	0.05
Solyc00g171710	54.56	4.21	0.06	0.11	0.07	0	0	0.13	0	0
Solyc00g171810	1.15	2.79	0.32	1.55	1.19	5	7	2.66	2.26	1.66
Solyc00g172410	0	0	0	0	0	0	0	0	0	0.07
Solyc00g173430	0	0	0	0	0	0	0	0	0	0
Solyc00g174330	12.43	78.98	10.69	17.09	36.62	22.41	23.03	99.32	5.21	10.4
Solyc00g174340	61.71	379.77	44.74	80.1	139.53	78.81	81.22	586.37	30.47	57.6
Solyc00g175240	0	0.11	0.1	0	0	0	0	0	0	0
Solyc00g178340	0.15	0	0	5.27	0	0	0	0	0.08	0
Solyc00g179240	5.24	1.21	33.46	31.33	0.36	0	0	0	0	0
Solyc00g179640	5.79	7.21	11.07	31.52	18.16	20.1	98.9	13.12	15.05	14.89
Solyc00g179840	0	0	0	0	0	0	0	0	0	0
Solyc00g180440	0	0.2	0	0	0	0.29	0	0	0	0
Solyc00g180840	1.3	0.08	0	0.37	0.17	0.18	0.35	0.33	0.14	0.11
Solyc00g181240	0	0	0	0	0	0.4	0	0	0	0.22
Solyc00g181250	0	0	0	0	0	0.08	0	0	0.06	0.05
Solyc00g183050	1.09	1.27	0.41	0.43	1	1.58	3.27	3.19	3.13	1.95
Solyc00g183550	0	0	0	0	0	0	0	0	0	0
Solyc00g184350	5.29	8.22	6.11	16.37	9.16	9.77	10.15	13	17.33	14.91
Solyc00g185750	0	0	0	0	0	0	0	0	0	0
Solyc00g185850	0	0	0	0	0	0	0	0	0	0
Solyc00g186050	0	0	0.09	0.57	0.22	0.24	0.09	0.12	0.09	0
Solyc00g187050	1682.26	11.34	6.09	1.42	55.01	98.21	22.93	1.94	0.53	0
Solyc00g188250	0.43	0.88	0	0.64	0	0.49	0.12	0.56	0.58	0.19
Solyc00g188750	0	0	0	0	0	0	0	0	0	0
Solyc00g188850	0.25	0.15	0	0	0	0	0	0	0	0
Solyc00g192150	0.03	0	0	0	0	0	0	0	0	0
Solyc00g195350	0	0	0	0	0	0.2	0	0	0	0
Solyc00g195360	0	0	0	0.26	0	0.09	0	0	0	0.88
Solyc00g196060	33.37	62.45	17.09	39.64	63.17	69.9	56.67	65.63	52.87	45.22
Solyc00g196460	0	0	0	0	0	0	0	0	0	0
Solyc00g198360	0	0	0	0	0	0	0	0	0	0
Solyc00g199960	0	0	0	0	0	0	0	0	0	0
Solyc00g201060	0	0	0	0	0	0	0.65	0	0	0
Solyc00g201160	0.36	0.6	2.04	3.49	0.17	0.37	0.23	1.49	0.35	0.07
Solyc00g201460	0.07	0	0.07	0	0	0	0.07	0	0	0
Solyc00g201760	0	0	0	0	0	0	0	0	0	0
Solyc00g202560	0	0	0	0	0	0	0	0	0	0
Solyc00g203660	0.22	0.09	0.66	0	0	0.23	0.33	0	0	0.72
Solyc00g206460	24.06	40.96	64.22	32.94	66.27	18.08	6.75	104.73	21.71	124.2
Solyc00g207960	0	0	0	0.12	0	3.66	0.66	1.85	0	0
Solyc00g209460	0.91	0.31	0.3	0	0.9	0.63	1.18	1.35	1.13	0.35
Solyc00g209560	0	0	0	0.07	0	0	0	0	0	0
Solyc00g210860	0	0	0	0	0	0.97	0	0	0	0
Solyc00g212260	0.16	0.28	1	0.95	0.03	0.13	0.12	0.14	0.25	0
Solyc00g213960	0	0	0	0	0	0	0	0	0	0
Solyc00g215560	0.74	0.51	0.98	1.21	0	0	0.67	1.4	0.32	1.42
Solyc00g217560	0.41	0.39	0.84	0.97	0	0	0	0	0	0
Solyc00g217960	19.35	13.16	14.74	12.34	7.65	8.53	22.11	36.33	60.47	25.8
Solyc00g218560	0	0	0	0	0	0	0	0	0	0
Solyc00g220360	0	0	0	0	0	0	0	0	0	0
Solyc00g222060	0	0	0	0	0	0	0	0	0	0
Solyc00g222460	0	0	0	0.54	0.21	0	0	0	0	0.14
Solyc00g226760	0	0	0	0	0.06	0.07	0.15	0	0	0
Solyc00g227860	17.59	24.2	39.45	14.79	14.59	8.12	4.34	11.16	3.71	0.72
Solyc00g227960	0	0	0	0	0.07	0.07	0.16	0	0	0
Solyc00g228260	0.84	0	0	0	0	0	0	0	0	0
Solyc00g229260	0.08	0	0	0	0	0	0	0	0	0
Solyc00g230060	0.69	1.38	0.67	0	0.54	0.81	1.4	0.28	0.22	0.09
Solyc00g230070	15.2	22.32	34.04	0.39	11.05	34.2	33.86	7.04	3.4	3.22
Solyc00g230080	9.93	18.76	35.96	0.58	8.51	23.57	35.21	4.46	1.97	0.86
Solyc00g230280	0	0	0	0	0	0	0	0	0	0
Solyc00g231680	0	0.05	0	0	0	0.06	0	0	0	0
Solyc00g231780	2.4	0.47	1.21	0.95	0.37	1.28	1.37	0.95	0.73	1.67
Solyc00g233480	0.23	0.55	2.04	45.63	0.65	1.96	0.54	3.09	0.26	0
Solyc00g237680	0	0	0	0	0	0	0	0	0	0
Solyc00g240580	0	0	0.32	0.34	0	0	0.32	0	0	0.51
Solyc00g244280	0	0	0	0	0	0.69	0.27	0	0	0
Solyc00g244290	2.29	2.87	2.19	4.48	3.88	3.72	6.09	4.55	9.58	9.19
Solyc00g244300	2.18	3.91	0.94	12.1	2.76	9.43	18.27	14.27	17.19	8.56
Solyc00g245200	0.24	0.82	1.84	0	0.32	1.84	3.17	0.36	0	0.42
Solyc00g246800	0	0	0	0	0	0	0	0	0	0
Solyc00g247300	0.1	10.74	0.2	32.95	0.45	2.29	2.36	27.1	0.63	0.07
Solyc00g249200	0	0.08	0	0	0	0	0	0	0	0
Solyc00g249900	14.12	14.69	10.64	16.83	23.51	19.16	33.08	29.41	21.8	8.66
Solyc00g249910	13.2	13.46	8.32	22.22	24.47	13.7	9.14	17.71	12.26	7.03
Solyc00g254110	0	0	0	0	0	0	0	0	0	0
Solyc00g254910	4.73	9.67	23.67	29.51	0.38	0	0.56	2.74	5.46	0.39
Solyc00g255510	0.03	0	0	0	0	0	0	0	0	0
Solyc00g256710	29.99	13.97	28.81	49.55	26.06	32.24	24.65	41.65	32.36	23.95
Solyc00g257110	1184.62	1234.18	0.2	2.85	1.13	0.34	4.38	2.34	0.53	0.08
Solyc00g263210	0	0	0	0	0	0	0	0	0	0
Solyc00g265110	6.55	2.22	1.63	0.19	3.95	6.24	3.09	2.11	1.91	0.86
Solyc00g265510	0	0	0.99	0.34	0	0	0.33	0	0	0
Solyc00g266110	0	0	0	0	0	0	0	0	0	0
Solyc00g268310	0	0	0	0	0	0	0	0	0	0
Solyc00g269810	0	0	0	0	0	0	0	0	0	0
Solyc00g270510	0	0	0	0	0	0	0	0	0	0
Solyc00g272810	4.34	6.23	152.81	9.24	6.16	3.07	0.88	0.66	0.78	0.43
Solyc00g273110	4.57	1.32	3.62	2.98	1.9	6.67	3.9	7.58	2.02	3.9
Solyc00g275310	0	0	0	0	0	0	0	0	0	0
Solyc00g277510	14.82	22.55	21.13	0.51	21.04	68.54	78.43	5.86	2.12	20.79
Solyc00g278110	2.66	2.32	13.32	0.16	0.09	0	0	0.09	0	0.12
Solyc00g280110	7.48	4.71	1.32	0	0	0	0	0	0	0
Solyc00g281110	0	0	0	0	0	0	0	0	0	0
Solyc00g282510	4.35	3.75	1.32	31.33	5.22	4.58	8.41	7.58	4.14	2.92
Solyc00g283010	0.14	0	0.03	1.38	0.03	0	0	0	0	0
Solyc00g283110	0	0	0	0	0	0	0	0	0	0
Solyc00g284510	0	0.07	0	0	0	0	0	0	0	0
Solyc00g286010	0	0	0	0	0	0	0	0	0	0
Solyc00g286020	0	0	0	0	0	0	0	0	0	0
Solyc00g286030	0	0	0	0	0	0	0	0	0	0
Solyc00g287330	0	0	0	0	0	0	0	0	0	0
Solyc00g289230	1.45	6.83	6.86	6.41	0.11	0.13	0.05	0.33	0.28	0.08
Solyc00g294230	0.22	0.09	0.25	0	0.9	0.56	0.08	0.2	0.08	0
Solyc00g294630	0	0	0	0	0	0	0	0	0	0
Solyc00g297330	0	0	0	0	0	0	0	0	0	0
Solyc00g300430	0	0	0	0	0	0	0	0	0	0
Solyc00g300730	0	0	0	0	0	0	0	0	0	0
Solyc00g303630	0	0	0	0	0	0	0	0	0	0
Solyc00g304030	0	0	0	0	0	0	0	0	0	0
Solyc00g304630	0	0	0	0	0	0	0	0	0	0
Solyc00g306730	0	0	0	0	0	0	0	0	0	0
Solyc00g306830	0	0	0	0	0	0	0	0	0	0
Solyc00g308530	0	0	0	0	0	0	0	0	0	0
Solyc00g308930	0	0	0	0	0	0	0	0	0	0
Solyc00g309530	0.28	0	0	0	0.37	0	0	0	0	0.25
Solyc00g311230	0.54	0.39	1.06	0.32	1.02	0.75	0.53	0.92	0.22	0
Solyc00g313030	0	0	0	0	0	0	0	0	0	0
Solyc00g313530	0	0	0	0	0	0	0	0	0	0
Solyc00g313930	0	0	0	0	0	0	0.33	0	0	0
Solyc00g316030	0.1	0	0	0	0	0	0	0	0	0
Solyc00g316530	0.18	0.64	0.42	0	1.01	0	0.42	0	0	0
Solyc00g316730	0.06	0	0	0	0	0	0	0	0	0
Solyc00g318030	0	0	0	0	0	0	0	0	0	0
Solyc00g318130	0	0	0	0	0.28	0.09	0.12	0	0	0
Solyc00g318830	0.63	0.9	0	0	0.22	0.36	0	0.2	0.09	0.42
Solyc00g320430	0	0	0	0	0	0.7	0	0	0	0
Solyc00g322630	0	0	0	0	0	0.25	0	0	0	0
Solyc00g322830	0	0	0	0	0	0	0	0	0	0
Solyc00g323130	2.76	0.62	32.78	384.08	0	0	0	0	0.05	0
Solyc00g324530	0.11	0	0	0	0	0	0	0	0	0
Solyc01g005000	29.67	22.85	17.83	9.81	21.57	35.09	33.92	14.75	1.66	1.13
Solyc01g005010	4.48	4.82	7.25	6.95	6.95	6.25	4.56	2.69	1.25	0.07
Solyc01g005020	12.73	15.65	11.24	32.06	21.22	30.12	34.69	34.14	24.52	17.12
Solyc01g005030	8.41	7.52	7.57	13.34	8.37	9.43	15.1	26.43	38.54	23.18
Solyc01g005040	0	0.15	1.22	0.08	0.09	0	0.29	0	0	0
Solyc01g005050	72.58	41.41	0	0.15	0	0.18	0.14	0	0	0
Solyc01g005060	3.36	3.75	1.69	1.97	20.79	8.55	3.75	5.25	2.55	1.75
Solyc01g005070	3.85	16.01	0.03	0.1	1.05	0.34	0.07	0.04	0.03	0
Solyc01g005080	25.41	61.71	14.28	31.31	21.84	15.35	9.17	25.17	13.41	7.02
Solyc01g005090	0	0	0	20.62	0.05	0	0	0	0	0
Solyc01g005100	9.95	10.87	19.98	17.46	12.84	11.6	10.89	14.29	7.51	9.08
Solyc01g005110	42.94	27.31	11.49	24.8	19.88	9.47	12.23	14.16	19.55	21.92
Solyc01g005120	29.1	154.59	4.44	46.68	10.74	11.23	3.48	12.48	4.75	4.44
Solyc01g005130	7.37	10.37	30.48	41.7	9.87	9.7	30.23	18.38	13.54	24.6
Solyc01g005140	0.12	1.51	0.05	6.99	0	0	0.05	5.08	11.58	16.21
Solyc01g005150	1.26	0.32	1.49	4.66	0.53	0.33	0.25	0.46	0.06	0
Solyc01g005160	0.05	0.06	0.03	0.33	0.28	0.32	0.03	1.82	0.41	0.64
Solyc01g005170	0.18	0	0.2	0.37	0.15	0.71	0.52	0.77	0.99	1.78
Solyc01g005180	0	0	0	0	0	0	0	0	0	0
Solyc01g005190	0.05	0.24	0.11	0.3	0.14	0.31	0.23	0.23	0.11	0.44
Solyc01g005200	0	0.06	0	0	0.07	0.29	0.06	0.08	0.22	0.05
Solyc01g005210	10.15	18.27	20.69	48.24	14.89	26.33	49.65	25.77	49.01	28.03
Solyc01g005220	1.99	6.58	2.78	4.92	1.18	3.83	4.91	18.08	13.51	12.1
Solyc01g005230	1.46	0.62	0.75	6.3	0.05	0.11	0.11	0.34	0.04	0
Solyc01g005240	17.6	19.67	17.06	26.02	29.05	42.06	32.67	39.56	32.69	17.99
Solyc01g005250	22.89	25.26	24.23	33.87	81.99	97.43	109.97	70.95	65.75	117.99
Solyc01g005260	4.28	1.72	4.75	6.14	4.29	4.59	5.27	3.99	4.02	1.22
Solyc01g005270	4.34	5.57	10.5	15.16	3.52	1.36	1.87	2.93	6.85	4.43
Solyc01g005280	6.54	4.33	8.77	0.89	3.17	4.55	3.17	2.83	9.53	2.32
Solyc01g005290	5.78	3.05	13.17	1.71	1.84	2.28	2.68	3.27	18.41	46.29
Solyc01g005300	2.38	9.57	86.17	63.08	34.36	29.14	106.88	71.96	77.91	57.46
Solyc01g005310	17.91	0.24	0	0.07	0.03	0	0	0.03	0	0
Solyc01g005320	0.08	0	0.09	25.64	0.15	0.12	0.08	0.16	0.04	0
Solyc01g005330	29.61	19.62	37.21	42.28	52.48	34.77	30.94	38.09	18.39	13.56
Solyc01g005340	5.09	7.96	4.83	13.25	6.72	8.56	12	16.2	14.75	13.23
Solyc01g005350	4.24	3.2	1.87	0.7	0.27	0.12	0.05	0.05	0	0
Solyc01g005360	25.69	0.39	0.09	0.1	0	0	0	0	0	0
Solyc01g005370	9.93	6.69	1.84	4.59	5.53	4.34	8.26	11.21	24.39	12.7
Solyc01g005380	3.33	4.51	6.29	5.47	8.65	11.02	9.48	9.1	7.82	13.04
Solyc01g005390	2.09	2.23	0.35	13.53	0.34	0.59	0.35	1.66	1.34	1.6
Solyc01g005400	10.73	3.74	11.55	4.09	1.82	0.74	0.68	0.17	0.19	0.68
Solyc01g005410	4.86	7.46	14.88	11.96	7.26	9.52	5.76	11.92	0.76	0.05
Solyc01g005420	4.69	1.71	20.48	1.86	1.02	1.15	0.3	1.97	0.23	0
Solyc01g005430	12.99	11.89	6.68	10.76	6.51	6.9	7.26	8	7.92	10.33
Solyc01g005440	307.94	107.01	96.32	83.34	316.16	239.41	343.52	87.72	34.77	33.65
Solyc01g005450	2.46	1.37	3.9	0	4.64	4.72	4.82	2.72	1.57	0.64
Solyc01g005460	13.93	4.2	3.21	7.31	14.95	4.63	3.57	0.55	0.13	0
Solyc01g005470	13.58	9.55	37.75	15.16	8.74	6.79	3.28	49.8	26.31	1.86
Solyc01g005480	3.43	2.78	2.77	7.01	4.76	7.51	8.32	7.09	4.04	4.41
Solyc01g005490	23.67	24.31	23.58	26.67	17.52	15.15	13.11	22.67	28.59	16.56
Solyc01g005500	0.36	0.11	1.83	1.7	0.06	0	0.05	1.92	0.05	0.12
Solyc01g005510	725.21	1168.06	0.25	2.41	1.37	0.19	3.72	1.95	0.46	0.04
Solyc01g005520	40.28	74.89	210.04	1.64	27.93	27.59	14.52	19.01	13.49	19.89
Solyc01g005530	9.81	9.41	11.05	15.35	7.38	8.98	5.26	7.11	5.35	4.33
Solyc01g005540	7.21	7.63	19	6.51	14.36	11.78	10.02	6.93	4.65	11.24
Solyc01g005550	53.35	60.38	59.66	72.01	85.69	56.73	39.07	31.7	15.48	11.26
Solyc01g005560	158.56	182.81	263.06	496.03	68.73	89.76	74	122.03	267.61	106.42
Solyc01g005570	42.46	30.37	38.42	35.87	36.26	26.38	19.34	21.6	23.08	11.29
Solyc01g005580	24.23	26.92	26.54	36	27.78	26.97	22.24	21.5	37.53	22.66
Solyc01g005590	42.47	121.79	32	49.73	25.93	25.13	14.8	44.33	4.73	1.85
Solyc01g005600	22.51	44.84	24.03	44.82	19.69	27.96	33.74	37.24	43.44	48.64
Solyc01g005610	0.3	0.66	0	0	0	0.06	0.04	0	0	0
Solyc01g005620	187.47	143.92	232.85	230.03	298.09	256.62	256.5	183.85	177.74	136.53
Solyc01g005630	0.19	0	0.07	12.78	0	0	0	0	0	0
Solyc01g005640	14.54	14.6	8.59	17.38	13.01	14.37	14.28	15.27	19.62	22.25
Solyc01g005650	0.17	0	0	0	0	0	0	0	0	0
Solyc01g005660	0.09	0.65	0	0	0.07	0	0.11	0	0.05	0
Solyc01g005670	2.39	2.95	2.65	4.57	2.7	3.24	3.82	4.85	3.25	2.45
Solyc01g005680	0.86	0.21	6.21	9.74	0.13	0.08	0.05	0	0	0
Solyc01g005690	13.74	12.63	14.19	32.23	26.74	37.24	28.44	36.51	27.53	20.04
Solyc01g005700	4.25	5.19	3.45	4.96	5.77	6.16	5.96	6.16	4.2	4.24
Solyc01g005710	1.72	0.17	0.49	0	0	0	0.16	0.64	0.16	0.13
Solyc01g005720	2.6	1.44	1.29	0.67	0.08	0.15	0.18	2.7	1.05	1.55
Solyc01g005730	3.43	3.15	3.95	0.76	0	0.03	0.11	1.2	0.35	0.91
Solyc01g005740	1.49	0	0.21	0.45	0.26	0	0	0	1.23	1.67
Solyc01g005750	34.98	13.39	59.48	0	1.28	0.94	0.18	0	0	0
Solyc01g005760	4.43	7.24	3.77	5.16	0.19	1	1.29	15.51	8.18	14.22
Solyc01g005770	1.28	1.94	0.29	0.91	1.42	1.18	3.94	0.49	0.29	0.8
Solyc01g005780	0.84	0.2	0.43	0.29	0.08	0.23	0.32	0.18	0.14	0.12
Solyc01g005790	3.17	3.04	3.34	2.75	2.81	3.05	4.17	3.4	2.53	2.78
Solyc01g005800	1.13	0.11	0.2	2.36	0.35	0.44	0.22	1.51	1.04	0.51
Solyc01g005810	24.74	20.63	15.44	28.01	38.41	32.81	53.72	35.63	35.4	24.83
Solyc01g005820	130.58	150.62	80.91	150.2	166.49	105.17	181.9	136.91	105.73	94.32
Solyc01g005830	18.05	10.75	16.12	22.42	42.32	28.81	18.44	13.34	5.16	0.63
Solyc01g005840	20.58	22.97	34.84	16.88	21.7	14.1	25.77	14.86	22.67	16.76
Solyc01g005850	0.2	0.45	0.33	26.26	0.4	0.46	0.77	0.56	0.27	0.7
Solyc01g005860	0	0	0.15	0.61	0.18	0.19	0.59	0	0	0
Solyc01g005870	7.48	2.36	3.04	0.28	0.05	0.12	0.21	1.59	0.63	0.99
Solyc01g005880	0.42	0.05	0	6.52	0	0	0	0	0	0
Solyc01g005890	0	0	0	0.59	0	0	0	0	0	0
Solyc01g005900	17.93	16.3	13.6	19.5	13.83	13.51	10.82	8.64	6.63	7.46
Solyc01g005910	15.04	12.87	25.17	5.86	10.81	9.21	8.81	8.45	12.54	8.91
Solyc01g005920	1.13	1.09	2.22	5.63	1.46	1.19	1.23	0.56	0.41	0.16
Solyc01g005930	6.13	15.52	16.11	1.3	4.31	5.81	7.53	9.98	16.77	15.75
Solyc01g005940	0	0	0	0.3	0	0	0	0	0	0
Solyc01g005950	39.91	32.4	26.58	40.43	39.26	37.37	32.71	36.04	39	23.89
Solyc01g005960	33.85	34.72	19.29	28.18	25.38	19.63	16.08	16.4	19.29	22.01
Solyc01g005970	5.07	2.67	3.28	14.37	2.74	3.67	4.35	4.89	2.77	2.58
Solyc01g005980	13.16	8.86	3.99	10.44	8.66	9.94	7.58	5.41	1.58	0.6
Solyc01g005990	57.62	18.77	100.11	39.09	37.36	22	9.32	9.39	0.38	0.2
Solyc01g006000	7.67	6.84	4.82	9.47	7.82	8.93	13.87	10.89	7.4	7.66
Solyc01g006010	3.23	4.81	2.92	8.55	3.93	6.7	6.79	9.3	8.28	13.66
Solyc01g006020	23.12	19.85	130.54	14.25	53.04	47.15	75.14	32.54	33.06	21.77
Solyc01g006030	7.49	12.62	4.6	10.02	6.98	6.22	8.33	8.88	9.94	9.75
Solyc01g006040	4.34	7.33	4.03	8.65	5.37	6.91	6.76	8.2	9.19	8.59
Solyc01g006050	2.77	3.84	0.11	0.52	0	0.1	0.07	0	0.04	0.03
Solyc01g006060	1.63	1.03	1.39	45.93	3.07	1.1	0.33	0	0.07	0
Solyc01g006070	3.29	0.05	0.25	2.09	0	0	0.05	0	0	0
Solyc01g006080	0	0.07	0	0	0.08	0	0	0	0	0
Solyc01g006090	7.36	8.48	5.32	12.01	14.2	9.22	6.28	9.22	4.55	12.32
Solyc01g006100	6.15	1.83	1.32	4.62	12.47	3.61	2.47	1.06	0.25	0
Solyc01g006110	36.35	44.46	31.75	48.63	43.29	36.1	37.77	44.77	49.05	68.49
Solyc01g006120	47.47	79.63	34.32	65.98	44.79	53.4	63.1	61.09	59.51	63.24
Solyc01g006130	30.2	25.71	60.29	5.48	28.88	23.39	32.39	35.86	19.33	16.39
Solyc01g006140	1.43	1.65	1.27	0.82	1.44	1.32	0.35	0.83	0.27	0.44
Solyc01g006150	20.09	20.29	27.87	7.89	24.24	18.23	15.69	10.57	3.07	12.77
Solyc01g006160	223.81	191.62	114.11	274.31	519.46	281.81	349.11	276.83	242.75	178.06
Solyc01g006170	10.21	13.98	10.65	23.96	32.36	19.15	9.43	21.12	11.95	35.15
Solyc01g006180	3.57	4.65	2.65	7.99	8.97	8.36	4.88	8.22	4.17	6.53
Solyc01g006190	43.46	49.44	35.1	47.01	31.64	26.83	37.9	41.08	49.32	47.96
Solyc01g006200	6.61	5.07	5.77	4.15	5.77	3.94	3.82	4.69	7.06	3.71
Solyc01g006210	3.58	1.68	0.84	1.96	6.97	3.7	1.64	1.93	0.95	0.54
Solyc01g006220	2.56	1.58	1.62	3.21	6.12	4.37	4.76	2.35	0.84	0.81
Solyc01g006230	15.81	23.76	16.93	24.62	16.28	14.99	15.58	18.9	36.17	33.01
Solyc01g006240	3.97	0.82	2.17	2.66	2.21	3.78	1.89	0.81	0.07	0
Solyc01g006250	3.65	2.7	4.77	2.05	2.38	2.13	2.62	2.43	2.75	2.07
Solyc01g006260	4.83	4.48	3.01	5.5	7.43	7.13	8.03	4.78	2.44	0.78
Solyc01g006270	0	0	0	0	0	0	0	0	0	0
Solyc01g006280	37.21	98.05	71.06	84.56	60.22	81.45	106.46	73.71	88.66	63.53
Solyc01g006290	46.98	15.89	6.7	3.7	1.47	0.88	0	0.86	0.34	0.31
Solyc01g006300	17.52	12.44	27.15	18.04	2.2	1.39	0.24	2.09	0	0.03
Solyc01g006310	0	0	0	19.49	0	0	0	0	0	0
Solyc01g006320	17.14	5.67	10.96	2.5	21.79	9.06	2.71	0.32	0.12	0.05
Solyc01g006330	5.48	3.93	56.86	0	2.69	1.81	1.1	0.08	0.13	0.08
Solyc01g006340	4.53	6.36	3.87	5.97	4.13	3.59	4.31	6.5	5.73	7.07
Solyc01g006350	16.61	16.24	13.6	32.29	23.54	25.1	31.42	35.53	30.22	26.41
Solyc01g006360	7.56	7.87	9.73	24.45	15.53	22.12	26.83	28.41	22.57	20.25
Solyc01g006370	22.06	15.01	12.9	34.06	67.34	76.26	77.06	35.8	11.77	12.88
Solyc01g006380	1.48	0.73	4.17	18.48	0.49	0.65	0.31	0.07	0.03	0.03
Solyc01g006390	66.7	5.35	0	1.01	41.26	27.65	0.96	0	0	0.06
Solyc01g006400	1860.23	282.61	129.16	137.24	893.53	288.32	136.64	0.89	1.06	0.14
Solyc01g006410	0	0	0	0	0.12	0	0	0	0	0
Solyc01g006420	0	0	0	0	0	0	0	0	0	0
Solyc01g006430	326.74	894.43	91.31	497.07	229.81	301.74	437.17	439.17	254.01	203.12
Solyc01g006440	9.2	0.06	0.03	0.17	0	0	0	0	0	0
Solyc01g006450	36.68	10.85	15.07	4.86	80.02	77.33	46.52	27.3	17.47	39.03
Solyc01g006460	0.04	0	0	0	0	0	0	0	0.05	0
Solyc01g006470	0	0	0	0	0	0	0	0	0	0
Solyc01g006480	8.99	8.05	6.41	9.15	11.87	7.8	6.14	7.27	9.52	10.27
Solyc01g006490	3.52	4.05	3.52	9.8	4.84	7.94	7.2	14.45	16.1	18.53
Solyc01g006500	4.61	5.31	6.16	4.7	4.24	5.08	8.86	5.12	5.31	5.73
Solyc01g006510	33.6	43.97	72.9	29.98	36.57	38.4	64.31	67.5	83.57	32.33
Solyc01g006520	0.93	2.31	4.59	1.31	0.47	1.22	0.63	2.38	0.69	0.09
Solyc01g006530	0	0	0	0.02	0	0	0	0.13	0	0
Solyc01g006540	31.97	33.03	17.41	0.09	14.42	31.29	9.89	5	88.99	298.91
Solyc01g006550	0.62	1.3	1.72	1.35	0	0.11	0.06	1.98	0.35	0.41
Solyc01g006560	52.47	16.99	117.15	0.05	2.2	2.35	0.64	0.08	0.99	2.38
Solyc01g006570	0	0	0	0	0	0	0	0	0	0
Solyc01g006580	0	0	0.04	19.19	0.04	0	0	0	0.13	0.08
Solyc01g006590	0.03	0	0	0	0	0.04	0	0.04	0	0
Solyc01g006600	0	0	0	0	0	0	0	0	0	0
Solyc01g006610	0	0	0	1.94	0	0	0	0	0.1	0.04
Solyc01g006620	0	0.07	0.13	0.74	0	0	0	0	0	0
Solyc01g006630	17.88	9.27	9.45	18.17	21.94	18.58	11.89	12.93	10.73	8.03
Solyc01g006640	0	0	0	0.02	0	0	0	0	0	0
Solyc01g006650	4.2	6.4	0.67	1.32	0.27	0.1	0.28	0.47	0.38	0.33
Solyc01g006660	0.22	0.22	0.72	5.33	0.03	0	0.03	0	0.05	0
Solyc01g006670	0.52	0.4	1.88	3.85	1.08	1.49	2.75	4.64	7.06	6.05
Solyc01g006680	4.1	2.09	12.75	8.69	16.19	15.46	63.63	32.6	42.84	14.74
Solyc01g006690	8.78	11.4	10.15	12.16	2.97	2.6	2.21	3.59	9.62	0.19
Solyc01g006700	7.27	9.72	5.64	20.81	18.72	20.8	16.82	17.2	12.69	18.02
Solyc01g006710	3.53	4.1	3.24	9.2	5.21	7.22	8.7	8.33	6.36	8.37
Solyc01g006720	11.81	25.51	34.33	3.19	4.26	7.23	3.79	1.28	0.2	0.24
Solyc01g006730	7.3	12.57	0.16	0.05	0.34	0.19	1.16	0.77	0.27	0
Solyc01g006740	4.37	2.94	3.36	4.8	4.64	5.11	4.07	4.35	2.09	0.83
Solyc01g006750	0.08	0.47	0.18	0.29	0.33	0.47	0.55	0	0.44	0
Solyc01g006760	5.55	24.78	0	0	0	0	0.07	0	0	0
Solyc01g006770	0	0	0	0	0	0	0	0	0	0
Solyc01g006780	0.28	0.57	0	0.58	0.29	0.45	0.4	0.18	0	0
Solyc01g006790	42.36	60.51	7.74	30.11	4.4	3.39	5.11	3.12	0.32	0.16
Solyc01g006800	48.94	58.41	31.55	74.6	54.42	51.17	57.01	60.76	49.9	52.77
Solyc01g006810	28.58	21.72	22.75	16.5	35.92	20.62	11.94	14.87	5.94	6.12
Solyc01g006820	0	0.07	0.19	0.4	0.08	0.92	0.32	0	0.25	0.21
Solyc01g006830	39.18	24.31	137.75	44.17	111.33	82	54.4	52.32	38.16	39.13
Solyc01g006840	0.26	0	0.03	6	0.33	0	0	0	0	0
Solyc01g006850	0.19	0.39	0.21	0.91	0.51	0.9	0.64	1.01	0.55	0.65
Solyc01g006860	15.9	9.06	9.18	8.46	18.52	8.66	8.23	7.58	6.84	5.11
Solyc01g006870	19.11	22.55	12.67	14.2	10.6	17.31	16.9	9.67	7.54	3.78
Solyc01g006880	4.3	3.46	3.6	6.39	4.27	6.37	10.25	7.23	10.3	10.4
Solyc01g006890	7.97	5.3	4.9	11.67	12.61	13.68	4.95	4.05	1.62	0.67
Solyc01g006900	316.69	237.67	118.81	309.93	858.42	412.06	285.52	210.44	166.76	133.3
Solyc01g006910	0.06	0	0.52	0.82	0	0	0	0	0	0
Solyc01g006920	0.23	0.21	0.24	0.54	0.39	0.49	0.86	0.71	0.43	0.46
Solyc01g006930	3.73	4.82	5.97	55.45	3.74	7.96	8.01	35.59	16.33	7.98
Solyc01g006940	43.8	24.68	84.51	4.61	59.11	45.93	45.78	26.54	18.74	16.46
Solyc01g006950	0.21	1.84	1.22	16.48	1.38	1.37	0.33	11.68	0.5	1.19
Solyc01g006960	6.43	5.21	6.27	17.27	11.15	14.04	18.29	16.24	12.12	10.98
Solyc01g006970	6.46	6.62	5.41	11.4	8.55	9.68	18.24	14.01	15.31	13.25
Solyc01g006980	29.3	13.41	18.51	20.75	56.7	67.03	45	25.11	18.75	10.66
Solyc01g006990	15.15	12.71	8.82	13.77	15.4	17.87	17.93	13.69	15.77	18.16
Solyc01g007000	0.06	0.04	1.17	2.57	1.39	0.25	0.04	1.05	0.17	0.12
Solyc01g007010	0.1	0.04	6.79	5.23	1.4	0.55	0.18	0.72	0.18	0.06
Solyc01g007020	0.12	0.07	9.31	6.81	0.56	0.37	0.1	1.53	0.41	0.54
Solyc01g007030	0.06	0.07	1.4	2.38	0.65	0.24	0.04	0.44	0.19	0.11
Solyc01g007040	0.04	0	2.67	7.77	1.46	0.94	0.14	1.93	0.4	0.22
Solyc01g007050	0	0	0.08	0.04	0.23	0.26	0.08	0.16	0	0
Solyc01g007060	5.81	6.19	5.88	10.14	6.45	5.75	6.13	5.98	6.88	8.05
Solyc01g007070	29.94	66.96	16.07	47.44	64.63	117.75	175.18	132.71	153.96	95.52
Solyc01g007080	0.59	0.17	0.04	0	0	0	0	0	0	0
Solyc01g007090	0.03	0.03	0	0	0	0	0	0	0	0
Solyc01g007100	9.89	17.99	29.12	2.41	6	8.9	5.84	6.8	1.38	6.45
Solyc01g007110	64.8	93.77	21.96	40.6	50.51	43.75	68.22	89.31	69.78	140.51
Solyc01g007120	10.93	13.36	10.51	16.03	14.63	11.67	9.41	15.71	13	17.39
Solyc01g007130	3.37	4.82	3.49	27.73	3.08	4.04	3.54	8.85	1.33	0.69
Solyc01g007140	1.94	1.75	1.74	4.36	2.87	2.96	2.27	2.91	1.32	3.35
Solyc01g007150	24.72	18.99	15.38	44.55	49.1	66.7	63.31	64.58	42.82	37.48
Solyc01g007160	1.82	0.52	0.34	1.28	3.78	2.04	0.34	0.67	0.16	0.14
Solyc01g007170	0.72	0.16	0.27	4.36	1.47	0.5	0.12	0.06	0.02	0
Solyc01g007180	5.01	4.47	3.86	4.67	4.42	4.32	6.96	6.54	8.31	6.2
Solyc01g007190	2.11	2.88	1.18	4.39	0.6	2.49	7.07	4.07	4.96	7.88
Solyc01g007200	6.71	4.78	0.32	0.34	0.84	0.33	0.42	0	0.05	0.04
Solyc01g007210	43.06	103.71	0	0.13	0.15	0	0.36	0.53	0	0
Solyc01g007220	73.82	99.84	47	384.61	35.97	120.14	336.82	503.82	366.01	85.06
Solyc01g007230	15.53	11.07	10.96	16.71	10.09	13.06	7.21	12.71	18.95	12.47
Solyc01g007240	13.14	39.03	0	0.08	0	0	0.29	0.08	0	0
Solyc01g007250	8.1	9.3	6.57	18.5	15.42	12.47	11.49	14.93	11.36	16.2
Solyc01g007260	1.12	0.78	1.04	10.8	0.32	0.58	0.54	0.11	0.07	0.09
Solyc01g007270	0	0	0	0	0	0.34	0	0	0	0
Solyc01g007280	0.36	0.37	0.81	0.37	0.98	1.76	1.22	0.35	0.39	0.6
Solyc01g007290	0.09	0.74	4.4	0.32	0.62	2.91	1.03	0.99	0.2	0.82
Solyc01g007300	0.96	1.26	8	0.53	0.79	3.76	2.9	1.79	0.9	1.94
Solyc01g007310	1.35	3.15	10.42	0.4	0.94	1.95	1.66	1.77	0.13	2.23
Solyc01g007320	30.04	80.18	294.63	47.04	90.33	447.65	459.34	196.71	122.49	113.9
Solyc01g007330	18.05	18.78	67.11	2.94	16.39	64.17	73.69	5.89	2.12	38.26
Solyc01g007340	0.41	0.37	0.36	0.83	0.35	1.79	1.56	0.31	0.15	3.22
Solyc01g007350	1.17	0.86	2.07	0.7	0.61	3.62	3.51	0.54	0.56	1.79
Solyc01g007360	0.54	0.36	1.21	0.36	0.96	3.41	1.75	0.29	0.42	2.48
Solyc01g007370	0.64	0.55	1.92	0.42	1.37	4.2	3.99	1.59	0.45	1.73
Solyc01g007380	0.68	0.42	1.93	0.69	0.81	3.79	4.13	1.11	0.65	2.46
Solyc01g007390	0.49	0	1.08	2.85	0	3.81	0	0.61	0	0.88
Solyc01g007400	15.09	13.95	37.97	6.91	21.73	25.18	24.96	14.36	9.4	18.43
Solyc01g007410	33.53	28.49	79.77	10.8	38.45	37.9	41.08	30.16	13.46	23.14
Solyc01g007420	0.6	0.92	3.34	0.24	2.17	4.9	2.92	0	0.21	0.36
Solyc01g007430	0.16	1.42	2.25	0.18	1.69	3.34	4.52	0.66	0.5	2.2
Solyc01g007440	21.6	23.44	104.04	3.34	11.21	20.19	29.52	18.49	7.18	13.43
Solyc01g007450	1.08	1.5	12.61	0.77	4.16	6.63	2.94	0.93	1.4	3.87
Solyc01g007460	0.84	0.33	7.13	0.5	2.9	3.02	3.35	1.84	1.23	0.76
Solyc01g007470	2.35	1.56	3.91	0.93	3.39	6.69	4.95	1.55	0.97	2.52
Solyc01g007480	0.36	0.21	0.21	0	0.25	0.26	0.21	0	0.39	0
Solyc01g007490	12.5	22.85	38	38.41	20.59	43.46	30.99	28.31	15.72	15.77
Solyc01g007500	5.35	5.73	14.73	0.17	4.88	18.26	25.3	2.06	0.56	1.73
Solyc01g007510	0	0	0	0	0	0	0	0	0	0
Solyc01g007520	0.73	0.42	1.59	0.22	0.75	4.56	4.43	0.43	0.14	0.22
Solyc01g007530	1.67	1.14	5.66	0.15	1.57	8.14	10.01	0.96	0.58	3.2
Solyc01g007540	0.76	0.6	2.43	0.23	0.44	5.59	6.11	0.2	0.21	0.91
Solyc01g007550	2.59	2.01	7.79	0.34	0.8	6.31	5.24	0.36	0	0.78
Solyc01g007560	0.2	0.23	0.45	0.35	0.2	1.45	1.35	0.39	0.16	0.31
Solyc01g007570	0.28	0.23	0.6	0.56	0.35	1.75	1.82	0.37	0.15	0.82
Solyc01g007580	0.22	0.06	0.37	0.48	0.15	1.87	1.02	0.07	0.09	0.31
Solyc01g007590	0.41	0.52	0.68	0.43	0.39	2.12	1.88	0.39	0.14	1.01
Solyc01g007600	0.97	1.03	1.63	1.15	1.79	6.76	4.83	1.09	0.75	2.7
Solyc01g007610	0.61	1.03	1.4	0.8	1.41	5.16	2.7	0.85	0.46	2.08
Solyc01g007620	1.75	2.02	1.7	2.94	5.46	14.92	4.8	1.01	0.55	6.48
Solyc01g007630	7.48	9.54	18.3	5.25	10.54	29.65	38.34	17.19	12.1	24.08
Solyc01g007640	0.11	0.13	0.11	0.31	0.21	0.7	0.64	0.12	0.05	0.47
Solyc01g007650	0.14	0.08	0.64	0.67	0.39	1.2	1.12	0.11	0.38	0.63
Solyc01g007660	1.69	2.69	9.15	0.58	3.75	8.61	10.3	4.08	2.63	5.57
Solyc01g007670	57.58	69.45	266.65	8.16	55.31	81.71	95.88	56.4	36.92	70.47
Solyc01g007680	0	0	0	0	0	0.32	0.13	0	0	0.1
Solyc01g007690	0.17	0.41	0.2	0	0.41	0.4	0.63	0	0	3.67
Solyc01g007700	1.35	3.25	0	0.1	3.05	0	0	0	0	0
Solyc01g007710	0	0	0	0	0	0	0	0	0	0
Solyc01g007720	8.53	14.37	25.34	3.53	16.74	30.87	25.22	2.72	1.55	159.04
Solyc01g007730	0	0	0	0	0	0	0	0	0	0
Solyc01g007740	44.52	36.64	23.34	26.82	59.59	71	63.77	62.53	55.24	78.44
Solyc01g007750	5.16	6.54	9.35	1.94	6.08	14.18	15.18	9.33	5.22	6.09
Solyc01g007760	7.79	7.24	6.14	11.74	12.8	10.66	8.91	13.04	14.1	19.47
Solyc01g007770	5.24	10.54	6.58	17.75	10.98	9.09	7.43	16.67	12.77	20.19
Solyc01g007780	2.53	1.72	2.11	16.97	0.93	0.51	0.49	0.47	0.16	0.64
Solyc01g007790	15.82	10.09	7.39	8.92	14.71	15.86	16.54	14.39	10.8	21.9
Solyc01g007800	1.61	1.59	1.2	0.98	0.47	0.08	0	0	0	0
Solyc01g007810	5.2	1.86	7.35	0.46	2.13	0.59	0.06	0	0.06	0
Solyc01g007820	4.8	4.7	3.91	11.61	5.03	7.53	5.68	3.39	4.8	6.51
Solyc01g007830	0.26	0.15	0.3	0.31	0.18	0.19	0.45	0	0.29	0.48
Solyc01g007840	11.38	10.64	6.43	11.4	13.14	18.92	16.51	16.48	18.64	26.05
Solyc01g007850	2.98	2.89	3.01	3	2.2	3.64	4.21	3.65	3.78	4.7
Solyc01g007860	90.75	121.7	73.72	148.69	145.7	162.81	220.23	127.93	141.8	91.02
Solyc01g007870	19.52	4.58	4.02	1.66	9.67	4.74	3.61	0.9	0.41	0.25
Solyc01g007880	4.45	3.77	6.36	3.73	6	6.56	6.61	6.38	3.55	6.77
Solyc01g007890	5.58	4.29	14.57	11.93	3.94	4.06	5.18	0.93	1.12	0.24
Solyc01g007900	17.92	13.56	7.76	16.45	16.05	14.99	11.19	20.41	20.08	27.49
Solyc01g007910	41.17	33.01	19.78	82.32	72.83	62.13	39.6	52.54	39.12	50.22
Solyc01g007920	16.08	17.47	21.58	14.76	14.87	17.18	33.93	40.29	44.89	39.42
Solyc01g007930	10.89	9.62	6.84	6.92	10.17	10.22	23.65	12.8	8.01	11.96
Solyc01g007940	0	0.04	0.07	0	0	0	0	0	0	0.09
Solyc01g007950	99.28	137.13	0.68	0.51	2.27	2.21	2.01	0.72	0.11	0.37
Solyc01g007960	0.09	0.18	0.15	8.7	0.03	0.21	0.13	0.33	0.21	0.02
Solyc01g007970	0.48	0.51	0.3	1.77	0.55	0.28	0.65	0.57	0.48	0.08
Solyc01g007980	5.8	6.84	6.57	1.53	5.32	9.05	11.23	11.57	6.24	1.62
Solyc01g007990	3.57	3.59	2.76	6.92	5.86	5.32	6.15	4.77	3.2	3.89
Solyc01g008000	573.65	624.04	260.04	379.32	529.43	414.17	743.57	1055.72	920.97	427.29
Solyc01g008010	45.33	96.8	15.32	7.21	14.2	9.16	4.95	5.73	2.37	2.21
Solyc01g008020	26.18	26.4	56.03	69.77	37.71	19.59	32.77	6.13	0.49	0.06
Solyc01g008030	0.51	0	0.15	41.71	0.35	0	0.29	0.16	0	0
Solyc01g008040	2.93	0.76	0	0.09	0	0	0	0	0.08	0
Solyc01g008050	22.35	6.58	0.07	5.04	0.04	0.1	0.04	0	0	0
Solyc01g008060	34.31	31.07	25.32	32.04	31.91	28.49	28.54	21.71	16.33	15
Solyc01g008070	35.9	47.09	36.27	14.56	23.7	24.96	48.49	51.01	107.72	155.94
Solyc01g008080	107.12	106.43	52.9	122.05	255.54	219.2	332.11	281.76	220.32	65.35
Solyc01g008090	463.61	437.54	247.6	564.08	1130.79	870.14	836.89	789.5	626.08	349.03
Solyc01g008100	31.73	20.35	14.11	21.1	31.41	36.15	27.47	26.19	20.37	4.83
Solyc01g008110	238.32	155.08	143.22	331.13	577.83	355.26	154.48	136.33	201.71	164.5
Solyc01g008120	8.57	12.93	11.46	29.55	12	15.65	18.2	17.33	15.97	19.78
Solyc01g008130	5.82	37.06	2.39	16.75	0.97	2.76	8.44	15.2	5.02	1.24
Solyc01g008140	3.61	8.12	2.92	26.95	3.44	6.94	9	7.01	8.56	4.4
Solyc01g008150	0.57	0	2.91	0.34	0	0	0.33	0	0	0.26
Solyc01g008160	13.06	11.43	7.88	4.97	22.97	18.68	14.9	14.69	23.23	31.38
Solyc01g008170	11.55	19.09	10.54	18.94	18.39	20.69	23.24	22.86	16.67	13.72
Solyc01g008180	15.58	11.03	15.15	13.76	14.35	7.34	8.36	10.26	7.93	3.08
Solyc01g008190	7.86	12.91	6.93	13.34	8.02	6.05	10.16	7.2	10.57	13.11
Solyc01g008200	7.38	10.91	4.21	8.91	6.64	6.69	8.21	7.6	7.82	10.07
Solyc01g008210	7.73	4.64	2	8.97	5.1	5.72	9.79	10.52	2.71	3.22
Solyc01g008220	1.9	1.9	0.81	3.48	1.53	3.51	4.6	5.66	1.07	1.4
Solyc01g008230	53.82	46.13	41.2	30.19	106.7	83.69	140.16	99.07	59.35	75.93
Solyc01g008240	575.02	615.99	0.27	1.11	0.6	0.21	2	0.85	0.26	0.08
Solyc01g008250	27.77	30.26	109.01	4.23	19.37	21.29	19.44	14.92	10.47	12.31
Solyc01g008260	15.58	14.1	6.52	10.58	12.01	7.64	10.65	18.56	14.5	14.73
Solyc01g008270	41.95	28.98	28.99	69.77	90.02	63.86	67.72	55.23	37.41	49.64
Solyc01g008280	12.06	18.45	8.3	27.54	19.68	29.84	32.4	41.3	40.51	39.18
Solyc01g008290	7.12	5.08	5.11	10.63	7	5.99	4.63	5.02	1.67	6.61
Solyc01g008300	2.04	2.88	2.55	15.02	1.44	1.91	1.91	4.66	5.77	1.83
Solyc01g008310	27.85	32.01	20.77	51.54	43.37	46.55	54.79	56.55	49.77	49.49
Solyc01g008320	9.42	14.96	9.49	20.98	9.97	15.1	21.04	24.94	33.61	61.2
Solyc01g008330	62.93	35.5	49.71	43.64	116.28	100.44	76.27	42.54	49.63	72.25
Solyc01g008340	13.24	9.45	10.1	21.4	22.66	23.35	11.95	19.64	16.39	24.54
Solyc01g008350	0.08	0	0	0.02	0.04	0.19	0.55	0.14	0.06	0.1
Solyc01g008360	88.04	72.89	38.35	44.07	77.06	42.41	46.25	47.1	48.31	51.45
Solyc01g008370	64.18	69.38	49.3	117.44	104.84	103.77	123.47	66.68	78.89	104.17
Solyc01g008380	0.41	0.59	0.79	1.79	2.08	1.51	2.98	2.24	0.67	2.43
Solyc01g008390	0	0	0	0	0	0	0	0	0	0
Solyc01g008400	1.07	0.41	0	0.21	0.99	0.56	1.84	1.05	1.37	0.48
Solyc01g008410	0	0	0	0.03	0	0	0	0	0	0
Solyc01g008420	4.98	3.86	0.16	0.41	3.91	7.67	8.58	6.9	5.39	0.64
Solyc01g008430	0	0.05	0	0	0	0.06	0	0	0	0
Solyc01g008440	23.48	33.22	7.01	6.12	3.1	4.89	5.11	7.19	1.97	10.18
Solyc01g008450	0.05	0	0	0.25	0.07	0	0	0	0	0
Solyc01g008460	14.68	12.74	7.74	12.23	14.69	11.64	12.35	14.04	10.94	12.96
Solyc01g008470	13.57	8.26	6.11	10.08	12.03	8.59	5.55	5.85	3.24	3.87
Solyc01g008480	3.22	2.94	4.62	5.66	4.34	5.38	6.63	7.52	5.6	5.95
Solyc01g008490	7.32	7.08	7.56	8.28	8.05	7.48	9.99	10.72	14.39	14.88
Solyc01g008500	0.31	0.11	0.38	1.24	0.13	0.23	0.52	0.73	0.07	0.06
Solyc01g008510	0.07	0.25	0.16	0.49	0	0.12	0.08	0.21	3.62	18.84
Solyc01g008520	1.29	0.98	1.32	2.07	2.01	4.09	7	4.52	1.36	1.2
Solyc01g008530	32.73	5.53	11.52	7.82	13.87	8.87	6.84	2.58	0.66	0.23
Solyc01g008540	0.38	0.67	0	0.04	2.3	0.8	1.36	0	2.67	0.06
Solyc01g008550	157.41	123.53	126.26	143.79	203.76	119.52	104.95	30.8	11.54	2.17
Solyc01g008560	14.92	16.47	8.92	18.33	11.85	8.94	6.51	18.77	8.25	16.81
Solyc01g008570	0.17	0	0.13	0.26	0	0	0	0.09	0	0
Solyc01g008580	0	0	0	0	0	0	0	0	0	0
Solyc01g008590	0	0	0	0	0	0	0	0	0	0
Solyc01g008600	14.92	7.76	3.08	3.66	58.6	31.05	12.49	7.46	4.86	5.69
Solyc01g008610	3.03	6.76	0	0.81	0	0	0	0	0	0
Solyc01g008620	0.89	1.65	1.2	30.78	0.1	0.17	0.4	0.27	0.12	0.45
Solyc01g008640	0	0.03	0	4.76	0	0	0	0	0	0
Solyc01g008650	0.05	0.23	0	15.69	0	0	0	0	0	0
Solyc01g008660	2.78	3.29	3.72	5.2	6.21	6.03	6.85	7.15	3.03	6.24
Solyc01g008670	13.69	14.3	5.88	0.4	0.46	0.12	0.26	0.36	0.08	0.16
Solyc01g008680	24.27	12.89	0.08	0.53	0.31	0.72	0.34	0.69	1.76	4.22
Solyc01g008690	0.04	0.05	0.18	8.14	0.45	0.41	0	0.05	0	0
Solyc01g008700	11.61	7.07	10.82	3.67	11.94	9.12	10.39	14.7	84.69	29.08
Solyc01g008710	0	1.5	0.96	0	0.08	0	0.04	1.45	796.04	120.13
Solyc01g008720	0.04	0.12	0.04	0	0.1	0	0.04	0	31.11	4.67
Solyc01g008730	11.95	15.15	8.3	17.43	8.07	8.9	12.81	14.22	19.82	14.46
Solyc01g008740	5.76	2.15	0	0	0	0	0.06	0	0	0
Solyc01g008750	0.02	0	0.02	0.02	0	0	0	0	0.04	0
Solyc01g008760	4.32	2.5	2.53	3.44	6.15	5.98	6.75	4.97	3.66	2.76
Solyc01g008770	19.55	16.22	20.75	23.12	26.45	23.61	21.3	17.78	8.51	10.28
Solyc01g008780	40.18	54.14	69.85	16.72	17.89	20.27	28.74	29.8	30.49	60.56
Solyc01g008790	17.56	5.98	25.62	5.96	60.69	63.35	54.51	40.88	9.21	0.68
Solyc01g008800	1.11	0.93	2.3	4.89	0.88	1.09	0.6	1.87	1.56	0.89
Solyc01g008810	30.22	31.92	19.65	22.13	26.94	17.72	28.86	16.69	14.22	9.26
Solyc01g008820	53.46	32.81	36.27	38.06	37.55	26.36	18.2	25.36	38.74	42.19
Solyc01g008830	2.44	4.33	8.41	0.03	0.38	0.28	0.54	0.71	0.66	0.16
Solyc01g008840	34.06	41.04	23.89	30.79	37.48	31.49	25.24	40.17	40.41	46.61
Solyc01g008850	67.29	133.97	59.26	10.07	44.26	40.46	45.86	85.18	95.64	116.71
Solyc01g008860	0	0	0	0	0	0	0	0	0	0
Solyc01g008870	0	0	0	0	0	0	0	0.17	0	0
Solyc01g008880	0.15	0.17	0.17	0	0	0	0.08	0.11	0.08	0
Solyc01g008890	12.82	16.5	12.86	11.79	10.44	9.37	12.76	8.06	5.82	8.56
Solyc01g008900	3.32	2.34	3.7	3.78	5.36	5.08	3.05	4.18	3.01	3.66
Solyc01g008910	2.05	6.44	1.37	3.3	1.73	0.67	1.25	1.66	4.97	10.11
Solyc01g008920	5.2	13.83	42.17	0.43	2.55	3.24	3.75	4.21	3.03	1.92
Solyc01g008930	12.78	10.98	6.64	2.07	12.62	9.02	6.45	6.19	3.31	2.28
Solyc01g008940	3.22	1.08	13.66	1.37	0.16	0	0	0	0	0
Solyc01g008950	275.41	266.24	134.72	256.48	292.3	194.49	228.6	218.39	219.79	141.69
Solyc01g008960	121.07	100.33	49.52	150.8	168.15	197.69	233.71	148.66	108.53	57.45
Solyc01g008970	129.93	173.18	134.06	207.57	212.66	214.16	341.97	223.75	241.82	116.11
Solyc01g008980	8.81	8.29	6.47	7.04	7	5.87	9	9.56	11.61	12.63
Solyc01g008990	20.36	17.67	10.9	14.29	21.73	16	19.15	15.12	12.57	15.22
Solyc01g009000	20.93	24.3	21.93	33.66	36.15	35.26	54.9	35.09	28.89	23.31
Solyc01g009010	48.94	38.97	25.55	7.39	40.09	23.9	20.09	16.51	37.46	54.44
Solyc01g009020	159.19	172.83	110.2	103.63	156.44	125.63	159.46	175.06	163.21	73.59
Solyc01g009030	6.81	4.71	4.12	18.11	13.08	14.21	13.88	14.88	14.03	19.67
Solyc01g009040	4.64	0.92	1.26	9.21	6.4	0.99	0.68	0.17	0	0
Solyc01g009050	19.61	21.56	21.23	25.17	22.78	21.13	26.43	24.63	25.66	44.16
Solyc01g009060	12.79	20.48	8.15	19.14	14.69	17.86	16.37	17.42	16.64	21.28
Solyc01g009070	19.37	16.65	5.15	9.09	4.8	7.85	9.85	8.33	5.73	4.04
Solyc01g009080	95.3	68.53	193.04	0.07	28.44	23.07	8.07	14.2	18.91	1.68
Solyc01g009090	24.56	32.54	18.09	33.61	34.61	26.6	45.44	35.63	35.27	38.74
Solyc01g009100	88.74	67.22	46.02	92.27	175.51	162.61	80.17	81.29	58.11	70.26
Solyc01g009110	6.13	7.63	10.79	3.33	5.09	5.54	8.43	8.12	10.03	17.55
Solyc01g009120	4.3	5.39	11.55	4.09	3.86	5.51	8.96	8.24	8.68	14.55
Solyc01g009130	0	0	0	0	0	0	0	0	0	0
Solyc01g009140	0	0	0	0	0	0	0	0	0	0
Solyc01g009150	12.74	9.2	8.31	10.96	15.72	15.06	9.39	14.5	9	12.63
Solyc01g009160	1.35	1.66	14.48	26.31	9.48	3.33	0.77	31.07	10.38	9.81
Solyc01g009170	23.52	76.43	42.73	104.46	15.77	28	53.24	98.39	125.21	62.13
Solyc01g009180	11.91	16.88	10.85	17.63	13.97	16.61	10.67	16.49	21.53	28.57
Solyc01g009190	0.4	0.04	0.08	0.08	0	0	0.04	0	0	0
Solyc01g009200	3.32	1.83	3.09	6.89	2.04	1.42	2.49	0.64	0.15	0.04
Solyc01g009210	0.23	0	0	0	0	0	0	0	0	0
Solyc01g009220	1.49	0.69	1.91	1.01	1.39	0.56	0.72	0.08	0	0
Solyc01g009230	1.81	2.61	7.76	10.52	3.01	4.95	4.29	5.56	3.64	1.83
Solyc01g009240	67.17	15.02	0.22	0.19	0.03	0	0.11	0.13	0.05	0.02
Solyc01g009250	5.15	10.51	0.87	0.49	0.66	0.77	1.28	1.45	0.97	0.16
Solyc01g009260	0	0	0.87	0.51	0.04	0.05	0	0	0	0
Solyc01g009270	0.03	0.07	0.11	0.04	0	0	0	0	0	0
Solyc01g009280	12.21	14.55	11.74	18.61	12.11	12.02	13.84	18.12	14.54	16.91
Solyc01g009290	12.09	14.09	5.89	14.53	11.95	9.62	11.19	10.84	11.33	14.95
Solyc01g009300	7.32	11.9	7.09	58.33	13.59	36.69	52.16	35.54	14.82	11.91
Solyc01g009310	56.33	41.1	46.04	116.76	98.03	106.64	102.05	129.58	55.33	65.29
Solyc01g009320	0	0.12	0	0.08	0	0	0	0	0	0.03
Solyc01g009330	0.14	0.12	0.15	0.48	0	0	0	0	0	0
Solyc01g009340	2.36	1.07	1.07	0.94	2.75	0.96	0.79	0.6	0.21	0.06
Solyc01g009350	0.88	0	0	0.05	0	0	0	0	0	0
Solyc01g009360	0	0	0	0	0	0	0	0	0	0
Solyc01g009370	0.26	0.77	0	17.2	0	0.09	0.03	0.05	0	0
Solyc01g009380	6.18	5.44	9.29	11.38	8.2	7.29	7.68	8.34	7.41	9.26
Solyc01g009390	5.45	8.47	3.55	12.25	4.02	6.67	8.34	8.97	14.65	14.87
Solyc01g009400	0	0	0	5.02	0	0	0	0	0	0
Solyc01g009410	0	0	0	14.57	0	0	0	0	0	0
Solyc01g009420	104.29	71.41	79.96	137.32	247.3	322.45	333.58	316.23	257.69	156.75
Solyc01g009430	84.38	158.78	25.05	26.63	56.99	110.66	234.61	282.66	600.75	212.07
Solyc01g009440	0.82	0	0	0	0	0.1	0	0	0	0
Solyc01g009450	73.32	81.43	74.04	107.98	81.53	92.29	156.68	147.14	223.96	101.53
Solyc01g009460	0	0	0	0	0	0	0	0	0	0
Solyc01g009470	0.04	0	0	0.09	0	0	0	0	0	0
Solyc01g009480	4.56	18.57	0.33	1.62	0.05	0	0.07	0.12	0.04	0
Solyc01g009490	0	0	0	0	0	0	0	0	0	0
Solyc01g009500	7.1	8.3	10.47	12.2	4.73	3.67	3.56	6.13	3.1	3.4
Solyc01g009510	0	0	0	0	0	0	0	0	0	0
Solyc01g009520	96.44	67.14	58.33	109.94	227.29	150.16	183.66	164.05	113.4	90.62
Solyc01g009530	0	0	0	0.08	0	0	0.08	0	0	0
Solyc01g009540	0	0	0	0	0	0	0	0	0	0
Solyc01g009550	0	0	0	0	0.23	0.24	0.37	0.21	0	0.15
Solyc01g009560	0	0	0	0.88	0	0	0	0	0	0
Solyc01g009570	18.15	12.72	34.14	0	2.21	0.59	0.09	0.1	0	0
Solyc01g009580	0.52	0	0	2.53	0.09	0	0.08	0	0	0
Solyc01g009590	989.23	0	0	0	0	0	0	0.13	0.09	0
Solyc01g009600	16.24	12.93	0.03	0.03	0	0	0.09	0.08	0	0
Solyc01g009610	30.27	22.26	31.16	30.4	62.49	43.49	39.66	36.72	15.83	12.13
Solyc01g009620	17.72	12.93	9.29	13.75	38.03	28.43	26.58	22.53	20.51	34.65
Solyc01g009630	22.65	22.25	22.29	25.99	39.93	29.85	30.5	27.24	30.43	49.72
Solyc01g009640	0	0	0	0	0	0	0	0	0	0
Solyc01g009650	0	0	0.18	0.37	0	0	0	0	0	0
Solyc01g009660	0	0	0	0	0	0	0	0	0	0
Solyc01g009670	1.41	1.73	9	1.02	2.34	1.39	1.07	0.76	0.23	0.1
Solyc01g009680	32.87	11.7	64.34	0.04	1.56	1.5	0.49	0.24	2.13	6.59
Solyc01g009690	0.8	1.01	0.94	5.24	0	0.37	0.12	0.93	0.22	0.42
Solyc01g009700	0.45	0.37	0.84	1.09	0.06	0.07	0.13	0.42	0.14	0.29
Solyc01g009710	0	0	0	0	0	0	0	0	0	0
Solyc01g009720	0.34	0.3	0.87	3.58	0.24	0.06	0	0.07	0.05	0.04
Solyc01g009730	0.09	0	0	0	0	0	0	0	0	0
Solyc01g009740	0	0.08	0	0	0	0	0	0	0	0
Solyc01g009750	71.31	90.84	49.47	75.11	83.35	77.57	101.6	142.12	139.46	178.68
Solyc01g009760	1.73	3.3	2.83	7.02	0.75	0.63	0.21	1.75	1.3	0.62
Solyc01g009770	8.67	1.79	2.45	19.43	11.89	5.15	3.55	2.53	5.61	2.83
Solyc01g009780	32.91	50.36	22.05	30.98	28.08	20.42	24.92	43.51	31.82	62.91
Solyc01g009790	0	0	0	0	0	0	0	0	0	0
Solyc01g009800	0	0	0	0	0	0	0	0	0	0
Solyc01g009810	0.08	0.09	0.41	1.37	0.2	0.59	0	0.69	0	0.45
Solyc01g009820	6.11	21.99	6.55	12.82	5.08	7.93	8.98	16.12	14.94	17.57
Solyc01g009830	0.48	0.39	0.04	5.49	0	0.06	0.47	3.85	0.12	0.04
Solyc01g009840	0	0	0	0.21	0	0	0.07	0	0.06	0
Solyc01g009850	31.23	20.22	13.01	14.07	30.46	13.46	11.32	10.49	12.86	14.18
Solyc01g009860	23.7	114.85	121.07	92.77	30.49	28.61	17.92	16.42	31.98	3.07
Solyc01g009870	10.73	3.24	0.06	0.36	19.12	23.09	44.34	20.14	0.72	2.86
Solyc01g009880	1.99	0.63	0	0	0	0	0	0	0	0
Solyc01g009890	0.33	0.13	0.25	0	0	0	0	0	0	0
Solyc01g009900	1.1	5.35	0.53	0	0.38	0	0	0	0	0
Solyc01g009910	0.48	0.28	0	0	0	0	0	0	0	0
Solyc01g009920	0.63	0.04	0	0	0	0	0	0	0	0
Solyc01g009930	0	0.06	0.2	0.99	0.04	0.08	0.06	0.2	0.03	0
Solyc01g009940	0	0	0	0	0	0	0	0	0	0
Solyc01g009950	0	0	0.11	0.11	0	0	0	0	0	0
Solyc01g009960	0.52	0.66	0	0	0	0	0	0	0	0
Solyc01g009970	13.64	12.1	21.58	8.99	19.06	16.72	17.6	10.73	12.7	21.18
Solyc01g009980	0	0	0	0	0	0	0	0	0	0
Solyc01g009990	124.36	82.7	121.09	29.71	173.28	138.83	79.02	61.44	59.02	100.78
Solyc01g010000	11.26	14.91	12.57	17.58	6.13	4.99	5.9	5.33	8.7	8.12
Solyc01g010010	0.17	0	0.07	0.21	0	0	0.07	0	0	0
Solyc01g010020	11.34	3.67	6.6	18.01	2.63	2.08	1.32	4.98	2.53	0.89
Solyc01g010030	4.78	5.71	6.25	14.94	6.13	4.53	3.18	2.39	2.47	2.71
Solyc01g010040	0	0	0	0	0	0	0	0	0	0
Solyc01g010050	26.99	29.02	45.85	29.81	23.48	33.98	45.9	27.67	15.28	17.9
Solyc01g010060	1.6	1.07	1.6	2.41	3.22	1.75	1.05	9.2	6.04	38.12
Solyc01g010070	0	0	0	0	0	0	0	0	0	0
Solyc01g010080	0.12	0.07	0.09	56.25	0	0	0	0.03	0	0.04
Solyc01g010090	0	0	0	0	0	0	0.06	0	0	0
Solyc01g010100	0	0	0	0	0	0	0	0	0	0
Solyc01g010110	0	0	0	0	0	0	0	0.17	0	0.11
Solyc01g010120	0	0	0	0	0	0	0	0	0	0
Solyc01g010130	19.63	68.21	7.61	8.85	7.09	7.68	8.56	3.64	1.39	1.37
Solyc01g010140	0	0	0.04	0	0	0	0	0	0	0
Solyc01g010150	22.64	14.15	3.95	10.63	0.39	0.41	0.71	2.66	2.85	5.81
Solyc01g010160	0.49	0	0	0	0.14	0	0	0.15	2.33	32.86
Solyc01g010170	0	0	0	0	0	0	0	0	2.45	49.86
Solyc01g010180	18.19	20.82	62.44	4.86	71.58	57.07	45.56	30.7	3.14	2.93
Solyc01g010190	25.48	20.63	9.83	18.5	41.72	30.54	37.3	20.43	16.16	22.07
Solyc01g010200	110.89	92.11	21	48.17	267.3	243.56	254.29	201.04	92.08	52.23
Solyc01g010210	0	0.09	0	0	0	0	0	0.1	0	0.42
Solyc01g010220	10.89	8.53	5.52	9.04	19.16	13.43	10.08	8.25	4.3	4.66
Solyc01g010230	33.51	29.64	12.3	80.07	61.98	74.1	52.8	59.68	21.88	64.11
Solyc01g010240	1.38	0	0	0	0	0	0	0	0	0
Solyc01g010250	9.43	7.75	8.2	0	14.34	9.28	6.02	13.04	23.36	14.06
Solyc01g010260	0	0	0	0.06	0	0	0	0	0	0
Solyc01g010270	90.18	58.81	70.91	133.63	190.15	164.19	148.95	221.5	69.27	56.67
Solyc01g010280	1.63	2.42	0.08	0.08	0	0	0	0	0	0
Solyc01g010290	10.37	9.9	17.42	51.64	8.07	9.17	7.74	9.45	6.34	4.25
Solyc01g010300	0	0	0	0	0	0	0	0	0	0
Solyc01g010310	35.57	9.52	6.52	41.12	33.89	48.8	37.85	22.47	13.03	0.29
Solyc01g010320	0.08	0	0	0	0	0	0	0	0	0
Solyc01g010330	0	0	0	0	0	0	0	0	0	0
Solyc01g010340	0.21	0.46	0.24	0.36	0.38	0.18	0.31	0.09	0.2	0.33
Solyc01g010350	3.29	0.04	0	13.18	0	0	0.11	0.14	0.1	0
Solyc01g010360	58.59	4.88	0	0	0.06	0.07	0.65	0.79	0.1	0.08
Solyc01g010370	7.26	2.12	3.8	4.88	4.07	2.64	2.23	1.97	0.97	0.4
Solyc01g010380	0.58	0.68	0	0	0	0	0	0	0	0
Solyc01g010390	63.95	4.16	7.64	18.42	9.18	8.41	9.54	4.06	0.98	1.24
Solyc01g010400	0	0	0	0	0	0	0	0	0	0
Solyc01g010410	0.5	0.26	0	0	0.31	0.57	0.75	1.92	3.04	0.66
Solyc01g010420	0.3	0.21	0	0.97	0	0	0	0.08	0	0.06
Solyc01g010430	28.12	11.37	5.39	18.19	4.53	6.8	3.78	26.15	23.91	28.94
Solyc01g010440	23.42	25.66	17.75	38.58	42.02	36.52	67.45	43.55	39.66	28.52
Solyc01g010450	0	0	0	0	0	0	0	0	0	0
Solyc01g010460	1.83	1.59	4.77	1.58	3.31	2.84	4.14	3.21	1.33	2.32
Solyc01g010470	4.66	4.56	11.51	3.83	5.46	4.74	6.79	7.55	3.85	5.09
Solyc01g010480	11.14	19.08	175.46	1.83	0.35	1.36	6.43	33.97	84.5	21.76
Solyc01g010490	0	0	0	0.14	0	0	0.11	3.98	17.85	24.52
Solyc01g010500	17.88	0.16	0.2	0	0	0	0	0.1	0	0
Solyc01g010510	1.18	0.9	1.5	1.39	0.7	0.83	0.71	0.76	0.63	0.91
Solyc01g010520	16.78	19.64	21.7	1.76	19.36	15.17	14.54	8	0.81	0.12
Solyc01g010530	1.06	0	0	0	0.04	0	0	0	0	0
Solyc01g010540	215.96	179.24	98.2	210.84	419.8	274.3	358.08	260.35	221.93	170.37
Solyc01g010550	0	0	0	0	0	0	0	0	0	0
Solyc01g010570	12.1	13.61	8.62	10.63	16.43	18.62	33.97	30.05	25.48	15.29
Solyc01g010580	210.87	199.48	102.45	268.58	471.52	364.94	548.59	350.64	295.11	187.49
Solyc01g010590	20.55	15.48	12.24	35.18	31.49	20.47	22.29	21.83	14.59	17.11
Solyc01g010600	5.11	4.17	0.06	0.17	0	0	0	0	0	0
Solyc01g010610	0	0	0	0	0	0	0	0	0	0
Solyc01g010630	0.04	0	0	0	0	0	0	0	0	0.06
Solyc01g010640	14.13	30.74	53.97	4.51	8.37	15.4	16.49	18.54	32.36	72.05
Solyc01g010650	45.26	29.21	8.13	19.23	21.45	19.72	39.96	34.44	35.36	19.46
Solyc01g010660	8.65	10.2	4.2	6.91	13.4	8.89	8.58	15.25	9.23	26.89
Solyc01g010670	0.14	0	0	0	0	0	0.32	0	0	0
Solyc01g010680	0	0	0	0	0	0	0.06	0	0	0
Solyc01g010690	0	0	0	0	0	0	0	0	0	0
Solyc01g010700	11.69	11.97	7.53	2.05	15.43	20.53	25.85	14.41	13.51	19.28
Solyc01g010710	1.82	0.49	3.58	30.69	1.17	1.04	0.97	2.31	0.11	0
Solyc01g010720	0	0	0	10.22	0	0	0	0	0	0
Solyc01g010730	0	0	0	2.75	0	0	0	0	0	0
Solyc01g010740	12.41	3.31	0	0	0.04	0	0.06	0	0	0
Solyc01g010750	145.3	246.63	81.16	306.07	223.21	311.64	424.52	319.37	370.93	344.38
Solyc01g010760	121.19	93.75	31.05	88.3	63.16	39.2	41.77	32.8	77.29	100.7
Solyc01g010770	0.65	2.47	9.82	3.83	0.71	2.18	7.19	5.17	3.05	0.24
Solyc01g010780	22.03	25.26	19.96	29.34	26.18	22.76	25.28	21.01	20.7	20.89
Solyc01g010790	0.13	0	0	0	0	0	0	0	0.05	0
Solyc01g010800	1.79	1.57	0.52	1.07	0	2.16	3.07	4.44	3.88	0.81
Solyc01g010810	7.57	8.53	9.33	9.79	12.21	11.03	9.97	14.61	10.26	14.38
Solyc01g010820	7.01	12.26	5.95	14.8	7.92	14.95	11.7	12.85	14.78	11.76
Solyc01g010830	13.12	10.24	10.54	9.43	14.74	14.46	13.07	17	21.01	19.41
Solyc01g010840	0	0	0	0	0	0	0	0	0	0
Solyc01g010850	0	0	0	0	0	0	0	0	0	0
Solyc01g010860	9.91	19.79	9.96	14.12	6.33	9.28	12.63	9.24	9.78	11.6
Solyc01g010870	12.3	14.82	12.05	25.35	16.19	20.83	25.07	37.21	78.56	91.75
Solyc01g010880	35.68	77.58	7.6	11.05	6.99	6.62	8.03	6.07	4.7	6
Solyc01g010890	3.63	3.34	0	0.1	0.06	0	0	0	0	0
Solyc01g010900	22.49	0	0	0.03	0	0	0.03	0	0	0
Solyc01g010910	1.46	0.41	1.02	0.1	0.06	0	0.05	0	0	0
Solyc01g010920	3.12	1.18	1.43	3.99	1.39	0.97	1.25	1.58	1.2	0.46
Solyc01g010930	2.17	0.53	1.48	3.1	1.46	1.18	1.26	1.7	0.55	0.41
Solyc01g010940	37.02	35.25	26.9	39.09	25.38	21.59	10.49	19.53	20.51	39.99
Solyc01g010950	33.25	38.23	11.82	3.27	12.21	9.65	12.42	12.5	13.14	15.58
Solyc01g010960	17.59	16.19	8.07	18.72	50.69	19.64	24.64	20.38	13.11	11.56
Solyc01g010970	1	1.92	0.31	1.84	0.09	0.13	0.02	0.41	0.59	0.64
Solyc01g010980	20.58	33.59	20.9	1.95	19.3	30.82	36.95	19.32	6.29	0.38
Solyc01g010990	3.84	2.3	3.13	6.92	4.71	6.82	5.52	8.15	7.27	7.24
Solyc01g011000	243.75	327.22	194.28	306.14	290.71	222.43	201.16	252.92	283.99	256.3
Solyc01g011010	5.08	5.67	4.69	8.29	2.93	2.6	3	6.52	4.44	7.91
Solyc01g011020	0	0.32	0	0.32	0	0	0	0	0	0.25
Solyc01g011030	23.43	22.94	6.82	9.47	16.73	17.58	30.94	26.94	25.99	16.94
Solyc01g011040	60.79	33.56	28.2	44.44	81.43	62.64	32.28	51.15	34.59	36.12
Solyc01g011050	446.56	679.39	0.31	1.15	0.5	0.52	2.34	0.92	0.4	0
Solyc01g011060	0	0	0	0.19	0	0	0	0	0	0
Solyc01g011070	0	0	0	0	0	0	0	0	0	0
Solyc01g011080	0	0	0	0.1	0.11	0.12	0.09	0	0	0
Solyc01g011090	1.08	1.07	2.35	3.07	1.87	2.56	2.9	3.77	3	3.28
Solyc01g011100	12.01	13.79	21.88	27.17	19.25	17.36	17.79	25.98	24	23.14
Solyc01g011110	0	0	0	0	0	0	0	0	0	0
Solyc01g011130	0	0	0	0	0	0	0.03	0	0	0
Solyc01g011150	0	0	0	0	0	0	0	0	0	0
Solyc01g011170	0	0	0	0	0	0	0	0	0	0
Solyc01g011180	4.74	3.67	2.55	4.8	4.97	4.28	13.05	11.82	7.64	6.03
Solyc01g011190	0.68	1.04	0.26	1.07	0.62	0.38	1.54	1.59	1.23	1.61
Solyc01g011200	0.59	0.34	0.8	0.28	0.73	1.22	1	0.65	0.58	1.27
Solyc01g011220	0.59	0.61	0.59	0.54	0.36	0.51	1.33	0.51	0.57	1.1
Solyc01g011230	0.44	0.86	0.84	0.18	0	2.12	1.67	0.6	0.65	0.53
Solyc01g011240	0	0	0	0	0	0	0	0	0	0
Solyc01g011250	0	0	0	0	0	0	0	0	0	0
Solyc01g011260	0	0	0	0	0	0	0	0	0	0
Solyc01g011270	0.13	0.15	0.15	0	0.18	0.37	0.29	0.36	0.28	0.12
Solyc01g011280	0	0	0	0	0	0	0	0	0	0
Solyc01g011290	0	0	0	0	0	0	0	0	0	0
Solyc01g011300	0	0	0	0	0	0	0	0	0	0
Solyc01g011310	0.05	0.06	0	0	0	0	0	0	0.06	0
Solyc01g011320	0.2	0.12	0	0	0	0	0	0	0.11	0
Solyc01g011330	0	0	0	0	0.11	0	0	0	0.09	0.07
Solyc01g011340	39.56	35.66	32.98	45.69	42.2	34.95	20.63	38.51	34.71	32.51
Solyc01g011350	25.49	17	25.57	39.8	181.43	188.98	327.74	120.51	82.34	77.77
Solyc01g011370	0.13	0	0	0.16	0	0	0	0	0	0.24
Solyc01g011390	14.87	34.61	0	0	0.07	0	0.18	0	0.06	0
Solyc01g011400	0	0	0	0	0	0	0	0	0	0
Solyc01g011410	0.77	0.67	1.54	0.46	1.08	3.94	1.77	1.03	0.84	2.25
Solyc01g011420	0	0	0	0	0	0	2.05	1.67	1.33	1.06
Solyc01g011430	0.35	0.18	0.09	7.09	0	0.04	0.03	0	0	0
Solyc01g011450	0	0	0.22	0	0	0	0	0	0	0
Solyc01g011460	0	0	0.11	0	0	0	0	0	0	0
Solyc01g011470	0	0	0	0	0	0	0	0	0	0
Solyc01g011480	0	0	0	0	0	0	0	0	0	0
Solyc01g011490	0.51	0.12	0.11	0	0	0	0	0	0	0
Solyc01g011500	0	0	0	0	0	0	0	0	0	0.2
Solyc01g011510	59.33	70.02	42.99	5.68	18.03	14.36	6.69	13.42	12.52	16.69
Solyc01g011520	0	0	0	0	0	0	0	0	0	0
Solyc01g011530	0	0	0	0	0	0	0	0	0	0
Solyc01g011540	0	0	0	0	0	0	0	0	0	0
Solyc01g012540	0	0	0	0	0	0	0	0	0	0
Solyc01g012550	0	0	0	0	0	0	0	0	0	0
Solyc01g012560	0	0	0	0	0	0	0	0	0	0
Solyc01g012570	0	0	0	0	0	0	0	0	0	0
Solyc01g012580	0.34	0.6	0.78	1.01	0	0.57	0.39	1.63	2.58	2.87
Solyc01g012590	0	0	0	0	0	0	0	0	0	0
Solyc01g012600	0	0	0	0	0	0	0	0	0	0
Solyc01g012610	0	0	0	0	0	0	0	0	0	0
Solyc01g012620	0	0.14	0	0	0	0	0	0.15	0.13	0.41
Solyc01g012630	0	0	0	0	0	0	0	0	0	0
Solyc01g012640	0	0	0	0	0	0	0	0	0	0
Solyc01g012650	0.11	0.26	0.13	0	0	0	0	0.33	0.12	0.47
Solyc01g012660	0	0	0	0	0	0	0	0	0	0
Solyc01g012670	0	0	0	0	0	0	0	0	0	0
Solyc01g012680	0	0	0	0	0	0	0	0	0	0
Solyc01g012690	0	0	0	0	0	0	0	0	0	0
Solyc01g012700	10.17	11.58	5.85	0.46	2.58	1.59	0.63	2.21	1.51	2.66
Solyc01g012710	0	0	0	0	0	0	0	0	0	0
Solyc01g012720	0	0	0	0	0	0	0	0	0	0
Solyc01g012730	0	0	0	0	0	0	0	0	0	0
Solyc01g012740	0	0	0	0	0	0	0	0	0	0
Solyc01g012750	27.03	28.87	22.96	2.87	8.9	4.49	2.91	5.98	6.03	7.57
Solyc01g012760	10.37	7.94	7.22	0.83	1.73	1.29	0.16	1.21	1.51	1.97
Solyc01g013760	0	0	0	0	0	0	0	0	0	0
Solyc01g013770	0	0	0	0	0	0	0	0	0	0
Solyc01g013780	0	0	0	0	0	0	0	0	0	0
Solyc01g013790	0	0	0	0	0	0	0	0	0	0
Solyc01g013800	0	0	0	0	0	0	0	0	0	0
Solyc01g013810	0	0	0	0	0	0	0	0	0	0
Solyc01g013820	0	0	0	0	0	0	0	0	0	0
Solyc01g013830	0	0	0	0	0	0	0	0	0	0
Solyc01g013840	0	0	0	0	0	0	0	0	0	0
Solyc01g013850	0	0	0	0	0	0	0	0	0	0
Solyc01g013860	0	0	0	0	0	0	0	0	0	0
Solyc01g013870	0	0	0	0	0	0	0	0	0	0
Solyc01g013880	0	0	0	0	0	0	0	0	0	0
Solyc01g013890	15.37	18.54	13.34	1.66	4.64	3.03	1.83	3.7	3.79	4.68
Solyc01g013900	30.08	39.21	16.39	2.48	9.78	6.29	3.12	4.15	5.99	7.23
Solyc01g013910	0	0	0	0	0	0	0	0	0	0
Solyc01g013920	0	0	0	0	0	0	0	0	0	0
Solyc01g013930	0	0	0	0	0	0	0	0	0	0
Solyc01g013940	0	0	0	0	0	0	0	0	0	0
Solyc01g013950	0	0	0	0	0	0	0	0	0	0
Solyc01g013960	0	0	0	0	0	0	0	0	0	0
Solyc01g013970	0	0	0	0	0	0	0	0	0	0
Solyc01g013980	0	0	0	0	0	0	0	0	0	0
Solyc01g013990	0	0	0	0	0	0	0	0	0	0
Solyc01g014000	0	0	0	0	0	0	0	0	0	0
Solyc01g014010	0	0	0	0	0	0	0	0	0	0
Solyc01g014020	0	0	0	0	0	0	0	0	0	0
Solyc01g014030	0	0	0	0	0	0	0	0	0	0
Solyc01g014040	0	0	0	0	0	0	0	0	0	0
Solyc01g014050	0	0	0	0	0	0	0	0	0	0
Solyc01g014060	0	0	0	0	0	0	0	0	0	0
Solyc01g014070	0	0	0	0	0	0	0	0	0	0
Solyc01g014080	0	0	0	0	0	0	0	0	0	0
Solyc01g014090	0	0	0	0	0	0	0	0	0	0
Solyc01g014100	6.54	8.53	0	0.13	21.38	11.61	11.17	0.16	0	0
Solyc01g014110	1.54	2.06	2.01	5.47	1.31	3.48	0.81	1.35	0.13	0.32
Solyc01g014120	1.71	2.31	4.86	6.16	1.3	2.21	2.9	1.81	0.33	0.18
Solyc01g014130	0	0	0	0	0	0	0	0	0	0
Solyc01g014140	1.97	1.14	5.34	3.26	0.68	0.43	0.22	0	0	0
Solyc01g014150	0.07	0	0	0	0	0	0	0	0	0
Solyc01g014160	0	0	0	0	0	0	0	0	0	0
Solyc01g014170	0	0	0	0	0	0	0	0	0	0
Solyc01g014180	161.46	153.04	92.82	153.32	155.83	182.02	417	472.1	582.9	347.14
Solyc01g014190	0	0	0	0	0	0	0	0	0	0
Solyc01g014200	12.41	11.01	3.1	1.77	16.12	10.83	15.52	12.66	2.45	0.23
Solyc01g014210	0.05	0	0	0	0.07	0	0	0.08	0	0.04
Solyc01g014220	1.28	0.68	2.51	2.71	2.74	2.22	0.93	2.73	0.51	0.21
Solyc01g014230	3.54	8.27	4.34	13.87	5.12	7	9.16	11.42	9.43	10.72
Solyc01g014240	0	0	0	0	0	0	0	0	0	0
Solyc01g014250	7.12	7.85	3.91	2.45	4.13	9.49	17.58	16.68	39.29	28.87
Solyc01g014260	0	0	0	0	0	0	0	0	0	0
Solyc01g014270	11	12.57	15.97	0.14	14.21	28.61	40.34	23.74	14.77	15.91
Solyc01g014280	0	0	0	0.05	0	0.06	0.04	0	0	0
Solyc01g014290	0	0	0	0	0	0	0	0	0	0
Solyc01g014300	0	0	0	0	0	0	0	0	0	0
Solyc01g014310	0	0	0	0	0	0	0	0	0	0
Solyc01g014320	2.08	1.04	10.69	0	0	0	0	0	0.06	0
Solyc01g014330	0.71	0.28	3.96	0.1	0	0	0	0	0	0
Solyc01g014340	0	0	0	0.09	0	0	0	0	0	0.06
Solyc01g014350	0	0	0	0	0	0	0	0	0	0
Solyc01g014360	0	0	0	0	0	0	0	0	0	0
Solyc01g014370	0	0	0	0	0	0	0	0	0	0
Solyc01g014380	1.37	2.12	4.43	4.5	0.75	1.5	1.85	2.3	0.38	0.11
Solyc01g014390	0.21	0	0	0	0	0	0	0	0	0
Solyc01g014400	0	0	0	0	0	0	0	0	0	0
Solyc01g014410	0	0	0	0	0	0	0	0	0	0
Solyc01g014420	0	0	0	0	0	0	0	0	0	0
Solyc01g014430	0	0	0	0	0	0	0	0	0	0
Solyc01g014440	0	0	0	0	0	0	0	0	0	0
Solyc01g014450	0	0	0	0	0	0	0	0	0	0
Solyc01g014460	0	0	0	0	0	0	0	0	0	0
Solyc01g014470	0	0.12	0.12	0	0.14	0.15	0	0	0	0
Solyc01g014480	9.6	11.07	8.84	16.72	7.47	7.96	8.9	9.93	13.26	8.44
Solyc01g014490	8.39	7.12	8	11.02	11.42	10.95	11.23	13.36	9.3	11.51
Solyc01g014500	0	0	0	0	0	0	0	0	0	0
Solyc01g014510	0	0	0	0	0	0	0	0	0	0
Solyc01g014520	0	0	0	0	0	0	0	0	0	0
Solyc01g014530	0	0.36	0	0	0	0	0	0.06	0.48	0.79
Solyc01g014540	0	0	0	0	0	0	0	0	0	0
Solyc01g014550	0	0	0	0	0	0	0	0	0	0
Solyc01g014560	0	0.04	0.12	0	0	0	0	0.09	0.44	2.06
Solyc01g014570	0	0	0	0	0	0	0	0	0	0
Solyc01g014580	0	0	0	0	0	0	0	0	0	0
Solyc01g014600	0	0	0	0	0	0	0	0	0	0
Solyc01g014610	0	0	0	0.25	0	0	0	0	0	0
Solyc01g014620	2.88	1.9	1.95	4.23	0	0	0	0	0	0
Solyc01g014630	0	0	0	0	0	0	0	0	0	0
Solyc01g014640	0	0	0	0	0	0	0	0	0	0
Solyc01g014650	0	0	0	0	0	0	0	0	0	0
Solyc01g014660	0	0	0	0	0	0	0	0	0	0
Solyc01g014670	0	0	0	0	0	0	0	0	0	0
Solyc01g014680	0	0	0	0	0	0	0	0	0	0
Solyc01g014690	0	0	0	0	0	0	0	0	0	0
Solyc01g014700	0.04	0.05	0.41	0.23	0	0	0.23	0.66	0.69	0.18
Solyc01g014710	13.54	21.64	3.93	18.51	11.96	7.72	6.12	10.62	19.81	36.13
Solyc01g014720	0	0	0	0	0	0	0	0	0.09	0.07
Solyc01g014730	6.09	5.15	0	2.63	5.34	0	3.15	2.24	1.19	1.46
Solyc01g014740	0	0.19	0.18	0.19	0	0.51	0	0.25	0.72	0.14
Solyc01g014760	0	0	0	0	0	0	0	0	0	0
Solyc01g014770	0	0	0	0	0	0	0	0.14	0.23	0.2
Solyc01g014780	0	0	0	0	0	0	0	0	0	0
Solyc01g014790	0	0	0	0	0	0	0	0	0	0
Solyc01g014800	0	0	0	0	0	0	0	0	0	0
Solyc01g014820	0.06	0	0.35	0.29	0	0	0	0	0	0
Solyc01g014830	0	0	0	0	0	0	0	0	0	0
Solyc01g014840	0.19	0.27	0.11	6.65	0.26	0.32	0.12	0.76	0.06	0.5
Solyc01g014850	13.68	14.84	9.92	26.9	18.91	15.85	20.3	19.57	16.83	19.21
Solyc01g014860	5.82	6.55	7.08	16.51	10.6	13.36	15.48	11.93	11.44	14.33
Solyc01g014870	0	0	0	0	0	0	0	0	0	0
Solyc01g014880	4.67	3.28	0	0	0	0	0	0	0	0
Solyc01g014890	0	0	0	0	0	0	0	0	0	0
Solyc01g014900	0	0	0	0	0	0	0	0	0	0
Solyc01g014910	0	0	0	0	0	0	0	0	0	0.04
Solyc01g014920	0	0	0	0	0	0	0	0	0	0
Solyc01g014930	0	0	0	0	0	0	0	0	0	0
Solyc01g014940	0	0	0	0	0	0	0	0	0	0
Solyc01g014950	0	0	0	0	0.15	0	0	0	0.13	0
Solyc01g014960	0	0	0	0	0	0	0	0	0	0
Solyc01g014970	0	0	0	0	0	0	0	0	0	0
Solyc01g014980	0	0	0	0	0	0	0	0	0	0
Solyc01g014990	0	0	0	0	0	0	0	0	0	0
Solyc01g015000	40.65	26.21	19.85	11.61	28.5	48.49	45.55	19.89	31.33	30.45
Solyc01g015010	0.25	0	0	0	0.35	0	0	0	0	0
Solyc01g015020	31.72	52.41	27.77	56.23	23.65	31.29	35.88	39.15	55.45	42.94
Solyc01g015030	0	0	0	0	0	0	0	0	0	0
Solyc01g015040	0.25	1.16	0.84	3.83	0.34	3.06	8.46	7.59	7.85	6.22
Solyc01g015050	0.46	0.71	1.72	3.77	1.46	3.8	7.93	5.92	8.58	8.94
Solyc01g015060	0	0	0	0	0	0	0	0	0	0
Solyc01g015070	11.27	9.75	4.68	8.47	6.31	7.44	17.39	12.62	16.03	18.91
Solyc01g015080	0	0	0	297.56	0	0	0	0	0	0
Solyc01g015090	0	0	0	0	0	0	0	0	0	0
Solyc01g015100	0	0	0	0	0	0	0	0	0	0
Solyc01g015110	0.14	0.32	0	0.06	0	0	0.16	0.13	0.05	0.12
Solyc01g015120	0	0	0	0	0	0	0	0	0	0
Solyc01g015130	0	0	0	0	0	0	0	0	0	0
Solyc01g015140	0	0.39	0	0.2	0	0.24	0.56	0	0.18	0.3
Solyc01g015150	0	0	0	0	0	0	0	0	0	0
Solyc01g015160	0	0	0	0	0	0	0	0	0	0
Solyc01g015170	0	0	0	0	0	0	0	0	0	0
Solyc01g015180	0	0	0	0	0	0	0	0	0	0
Solyc01g015190	0	0	0	0	0	0	0	0	0	0
Solyc01g015200	0	0	0	0	0	0	0	0	0	0
Solyc01g015210	0	0	0	0	0	0	0	0	0	0
Solyc01g015220	0	0	0	0	0	0	0	0	0	0
Solyc01g015230	0	0	0	0	0	0	0	0	0	0
Solyc01g015240	0	0	0	0	0	0	0	0	0	0
Solyc01g015250	0	0	0	0	0	0	0	0	0	0
Solyc01g015260	0	0	0	0	0	0	0	0	0	0
Solyc01g015270	0	0	0	0	0	0	0	0	0	0
Solyc01g015280	0	0	0	0	0	0	0	0	0	0
Solyc01g015290	0	0	0	0	0	0	0	0	0	0
Solyc01g015300	0	0	0	0	0	0	0	0.39	0	0
Solyc01g016300	0	0	0	0	0	0	0	0	0	0
Solyc01g016310	0	0	0	0	0	0	0	0	0	0
Solyc01g016320	0	0	0	0	0	0	0	0	0	0
Solyc01g016330	0	0	0	0	0	0	0	0	0	0
Solyc01g016340	0	0	0	0	0	0	0	0	0	0
Solyc01g016350	0	0	0	0	0	0	0	0	0	0
Solyc01g016360	0.57	0.66	0.86	0.56	0	0	0	0.12	0.1	0
Solyc01g016370	0.46	0.29	0.52	0.83	0.03	0.07	0.05	0.36	0.11	0.31
Solyc01g016380	3.53	0.64	0.04	0.08	0.05	0	0	0	0	0
Solyc01g016390	2.3	0.26	0	0.09	0	0	0	0	0	0
Solyc01g016400	0.35	1.05	0.61	0.42	0	0.26	0	0.5	0.77	1.27
Solyc01g016410	5.63	5.48	3.66	8.05	8.75	7.15	10.7	17.21	25.53	24.41
Solyc01g016430	0	0	0	0	0	0	0	0	0	0
Solyc01g016450	0	0	0	0	0	0	0	0	0	0
Solyc01g016460	19.34	18.34	17.79	18.14	12.54	18.91	15.68	19.41	7.79	6.68
Solyc01g016470	42.34	35.78	18.85	62.88	78.93	63.52	33.49	43.86	32.83	39.16
Solyc01g016480	0.03	0	0	0	0	0	0	0	0	0.05
Solyc01g016510	0	0	0	0	0	0	0	0	0	0
Solyc01g016520	0	0	0	0	0	0	0	0	0	0.27
Solyc01g016530	0	0	0	0	0	0	0	0	0	0
Solyc01g016540	0.1	0.12	0.23	0	0	0	0	0	0	0
Solyc01g016550	0	0	0	0	0	0	0	0	0	0
Solyc01g016560	0.35	0	0.27	0	0	0	0.13	0	0.13	0
Solyc01g016570	0.91	0.8	1.04	2.08	1.26	3.12	2.6	2.54	1.41	1.7
Solyc01g016580	0	0	0	0	0	0	0	0	0	0
Solyc01g016590	0	0	0	0	0	0	0	0	0	0
Solyc01g016600	0	0	0	0	0	0	0	0	0	0
Solyc01g016610	0	0	0	0	0	0	0	0	0	0
Solyc01g016620	0	0	0	0	0	0	0	0	0	0
Solyc01g016630	0	0	0	0	0	0	0	0	0	0
Solyc01g016640	0	0	0	0	0	0	0	0	0	0
Solyc01g016650	0.33	0	0	0	0	0	0	0	0	0
Solyc01g016660	0	0	0	0	0	0	0	0	0	0
Solyc01g016670	0	0	0	0	0	0	0	0	0	0
Solyc01g016680	0	0	0	0	0	0	0	0	0	0
Solyc01g016690	0	0.17	0	0	0	0	0	0	0	0
Solyc01g016700	0.46	0	0	0	0	1.4	0	0.35	0.26	0.84
Solyc01g016710	0	0	0	0	0	0	0	0	0	0
Solyc01g016720	1.09	1.09	0	0	0.21	0.45	0	0.47	0	0.14
Solyc01g016730	0	0	0	0	0	0	0	0	0	0
Solyc01g016740	0	0	0	0	0	0	0	0	0	0
Solyc01g016750	0	0	0	0	0	0	0	0	0	0
Solyc01g016760	0	0	0	0	0	0	0	0	0	0
Solyc01g016770	0	0	0	0	0	0	0	0	0	0
Solyc01g016780	0	0	0	0	0	0	0	0	0	0
Solyc01g016790	0	0	0	0	0	0	0	0	0	0
Solyc01g016800	0	0	0	0	0	0	0	0	0	0
Solyc01g016810	0	0	0	0	0	0	0	0	0	0
Solyc01g016820	0.07	0	0	0	0	0	0	0	0	0
Solyc01g016830	0	0	0	0	0	0	0	0	0	0
Solyc01g016840	0	0	0	0	0	0	0	0	0	0
Solyc01g016850	0	0	0	0	0	0	0	0	0	0
Solyc01g016860	0	0	0	0	0	0	0	0	0	0
Solyc01g016870	0	0	0	0	0	0	0	0	0	0
Solyc01g016880	0	0	0	0	0	0	0	0	0	0
Solyc01g016890	0	0	0	0	0	0	0	0	0	0
Solyc01g016900	0	0	0	0	0	0	0	0	0	0
Solyc01g016910	0	0	0	0	0	0	0	0	0	0
Solyc01g016920	0	0	0	0	0	0	0	0	0	0
Solyc01g016930	0	0	0	0	0	0	0	0	0	0
Solyc01g016940	0	0	0	0	0	0	0	0	0	0
Solyc01g016950	0	0	0	0	0	0	0	0	0	0
Solyc01g016960	0	0	0	0	0	0	0	0	0	0.08
Solyc01g016970	0.11	0.13	0	0.13	0	0	0	0.42	0.24	0.7
Solyc01g016980	0	0	0	0	0	0	0	0	0	0
Solyc01g016990	0	0	0	0	0	0	0	0	0	0
Solyc01g017000	0	0	0	0	0	0	0	0	0	0
Solyc01g017010	0	0	0	0	0	0	0	0	0	0
Solyc01g017020	0	0	0	0	0	0	0	0	0	0
Solyc01g017030	0	0	0	0	0	0	0	0.12	0	0
Solyc01g017040	0	0	0	0	0	0	0	0	0	0
Solyc01g017050	0	0	0	0	0	0	0	0	0	0
Solyc01g017060	0.07	0	0	0	0	0.11	0.07	0	0	0.17
Solyc01g017070	0	0	0	0	0	0.24	0.17	0	0	0
Solyc01g017080	0	0	0	0	0	0	0	0	0	0.06
Solyc01g017090	0.39	0.08	0.15	0.31	0	0.7	0.22	0.08	0	0.12
Solyc01g017100	0	0.28	0	0	0	0.2	0.14	0.18	0.13	0.21
Solyc01g017110	0.19	0	0.04	0	0	0.11	0	0	0.08	0
Solyc01g017120	0	0	0	0	0	0	0	0	0	0
Solyc01g017130	0	0	0	0.22	0	0	0.43	0.24	0	0
Solyc01g017140	0	0.1	0	0	0.06	0	0.15	0	0	0
Solyc01g017150	0	0	0	0	0	0	0	0	0	0
Solyc01g017160	0	0	0	0	0	0	0	0	0	0
Solyc01g017170	0.31	0.61	1.06	0.25	0.29	1.49	2.25	0.58	0.79	1.97
Solyc01g017180	0	0	0	0	0	0	0	0	0	0
Solyc01g017190	0	0	0	0	0	0	0	0.17	0	0
Solyc01g017200	0	0	0	0	0	0	0.15	0	0	0.11
Solyc01g017210	0	0	0	0	0	0	0	0	0	0
Solyc01g017220	3.25	10.55	45.13	6.16	18.62	57.49	83.53	30.59	15.72	12.39
Solyc01g017230	0.07	0	0	0	0	0	0.08	0	0.08	0
Solyc01g017240	0	0	0	0	0	0.18	0	0.19	0	0
Solyc01g017250	0	0	0	0	0	0	0.14	0.16	0	0
Solyc01g017260	0	0	0	0	0	0	0	0	0	0
Solyc01g017270	0	0	0	0	0	0	0	0	0.25	0
Solyc01g017280	0	0	0	0	0	0	0	0	0	0
Solyc01g017290	0	0	0	0	0	0	0	0	0	0
Solyc01g017300	0.15	0.18	0.12	0	0.14	1.05	0.82	0.07	0	0.09
Solyc01g017310	0	0	0	0	0	0	0	0	0	0
Solyc01g017320	0.21	0	0.24	0.25	0	0	0.48	0	0	0.19
Solyc01g017330	0.52	0.49	1.4	0.13	0.43	4.35	2.48	0.13	0	0.28
Solyc01g017340	0.37	0.14	0.49	0.15	0	0.09	0.28	0	0	0.06
Solyc01g017350	0.49	0.12	0	0	0.14	0.17	0	0	0	0
Solyc01g017360	0.31	0	0	0	0	0.48	0	0	0	0.14
Solyc01g017370	0.09	0	0.2	0.31	0	0.27	0.1	0	0.1	0.47
Solyc01g017380	0	0	0	0	0.23	0	0.95	0.21	0	0
Solyc01g017390	0	0	0	0	0	0	0	0	0	0
Solyc01g017400	0.47	0.61	1.72	0.08	0.37	1.24	0.98	0.29	0.36	1.37
Solyc01g017410	0	0	0	0	0	0	0.1	0	0	0
Solyc01g017420	0	0	0.04	0.04	0.08	0.05	0.21	0.05	0	0.05
Solyc01g017430	0	0	0	0	0	0	0	0	0	0
Solyc01g017440	0	0	0	0.09	0	0	0.08	0	0	0.07
Solyc01g017450	0	0	0	0	0	0	0	0	0	0
Solyc01g017460	0.55	0	0.32	0.33	0	2.2	1.26	0	0	0.5
Solyc01g017470	0.2	0	0.12	0.12	0	0.76	0	0	0.11	0
Solyc01g017480	0	0	0	0	0	0	0	0	0	0
Solyc01g017490	0	0	0	0	0	0	0	0	0	0
Solyc01g017500	0	0	0	0	0	0	0	0	0	0
Solyc01g017510	0	0.06	0	0.06	0	0.07	0	0	0	0.09
Solyc01g017520	0.17	0	0.2	0	0	0	0	0.27	0	0
Solyc01g017530	0	0.25	0.08	0	0.2	0.33	0.17	0	0.08	0.13
Solyc01g017540	0	0	0.34	0.89	0	0	0	0	0	0
Solyc01g017550	0.06	0.07	0	0	0	0	0	0.07	0.06	0
Solyc01g017560	0.2	0.24	0.12	0	0	0.15	0	0	0	0
Solyc01g017570	0	0	0	0	0	0	0	0	0	0
Solyc01g017580	0	0	0	0	0	0	0	0	0	0
Solyc01g017590	3.27	2.3	2.21	3.1	0.9	2.05	0.74	0.82	0	0.6
Solyc01g017600	31.95	26.83	31.93	7.05	1.14	0.41	0.22	0	0.07	0
Solyc01g017610	0	0	0	0	0	0	0	0	0	0
Solyc01g017620	0	0	0	0	0	0	0	0	0	0
Solyc01g017630	0	0	0	0	0	0	0.15	0	0	0
Solyc01g017640	0	0	0	0	0	0	0	0	0	0
Solyc01g017650	0	0	0	0	0	0	0	0	0	0
Solyc01g017660	0	0	0	0	0	0	0	0	0	0
Solyc01g017670	0	0	0	0	0	0	0	0	0	0
Solyc01g017680	0	0	0	0	0	0	0	0	0	0
Solyc01g017690	0	0	0	0	0	0	0	0	0	0
Solyc01g017700	0	0	0	0	0	0	0	0	0	0
Solyc01g017710	0	3.58	1.25	2.3	0.38	0	0	0.85	0	0.25
Solyc01g017720	2.91	5.24	1.01	2.67	0.63	1.09	0.77	1.54	0	0.21
Solyc01g017730	0	0	0	0	0	0	0	0	0	0
Solyc01g017740	0.59	0.18	1.66	0	0.2	2.85	3.34	0.37	0.17	1.71
Solyc01g017750	0.1	0	0	0	0	0	0	0	0	0
Solyc01g017760	0	0	0	0	0	0	0	0	0	0
Solyc01g017770	0	0	0	0	0	0	0	0.05	0	0
Solyc01g017780	0	0	0	0	0	0	0	0	0	0
Solyc01g017790	0	0	0	0	0	0	0	0	0	0
Solyc01g017800	0	0	0	0	0	0	0	0	0	0
Solyc01g017810	0	0	0	0	0	0	0	0	0	0
Solyc01g017820	0	0	0	0	0	0	0	0	0	0
Solyc01g017830	0	0	0	0	0	0	0	0	0	0
Solyc01g017840	0.29	0.26	0.29	0	0.3	0.68	0.91	0.69	0.04	0
Solyc01g017850	0.02	0.02	0.02	0	0	0	0	0	0	0
Solyc01g017860	4.39	2.97	3.53	4.12	5.81	6.38	11.65	5.65	6.78	10.66
Solyc01g017870	3.72	0	0	0.19	0.23	0	0	0	0	0
Solyc01g017880	0	0	0	0	0	0	0	0	0	0
Solyc01g017890	0	0	0	0	0	0	0	0	0	0
Solyc01g017900	0	0	0	0	0	0	0	0	0	0
Solyc01g017910	0	0	0	0	0	0	0	0	0	0
Solyc01g017920	0	0	0	0	0	0	0	0	0	0
Solyc01g017930	0	0	0	0	0	0	0	0	0	0
Solyc01g017940	0	0	0	0	0	0	0	0	0	0
Solyc01g017950	0	0	0	0	0	0	0	0	0	0
Solyc01g017960	0	0	0	0	0	0	0	0	0	0
Solyc01g017970	0	0	0	0	0	0	0	0	0	0
Solyc01g017980	0	0	0	0	0	0	0	0	0	0
Solyc01g017990	0	0	0	0	0	0	0	0	0	0
Solyc01g018000	0	0	0	0	0	0	0	0	0	0
Solyc01g018010	1.62	1.88	3.63	4.43	2.93	5.01	4.25	1.48	1.16	0.47
Solyc01g018020	3.2	6.89	0	0.02	0	0	0	0	0.04	0.02
Solyc01g018040	0	0	0	0	0	0	0	0	0	0
Solyc01g018050	0	0	0	0	0	0	0	0	0	0
Solyc01g018060	3.2	2.46	16.87	0	1.84	2.39	2.73	2.42	0.88	2.89
Solyc01g018070	0	0	0	0	0	0	0	0	0	0
Solyc01g018080	0	0	0	0	0	0	0	0	0	0
Solyc01g018090	0.29	1.01	3.42	0	0.6	9.56	6.22	0.22	0	0.51
Solyc01g018100	0	0	0	0	0	0	0	0	0	0
Solyc01g019100	0	0	0	0	0	0	0	0	0	0
Solyc01g020100	0	0	0	0	0	0	0	0	0	0
Solyc01g020110	0	0	0	0	0	0	0	0	0	0
Solyc01g020120	0.19	0.11	0.44	0.57	0.8	0.72	0.11	2.08	0.32	0.51
Solyc01g020130	4.11	4.44	6.03	14.6	4.15	5.15	4.21	8.34	8.19	9.6
Solyc01g020140	7.28	5.78	7.43	22.76	7.72	7.71	5.46	8.17	10.67	14.31
Solyc01g020150	14.19	11.67	12.28	38.09	12.35	12.59	11.59	14.99	24.18	21.59
Solyc01g020160	1.31	0.44	0.64	1.11	0.51	0.27	0.22	0	0.42	0
Solyc01g020170	0	0	0.06	0	0	0	0	0	0	0
Solyc01g020180	0	0	0	0	0	0	0	0	0	0
Solyc01g020190	5.82	8.56	6.31	18.42	11.65	15.85	30.44	21.36	14.19	16.83
Solyc01g020200	0	0.11	0.11	0.22	0	1.91	0.42	0.4	0.3	0.42
Solyc01g020210	0	0	0	0	0	0	0	0	0	0
Solyc01g020220	7.51	6.03	7.09	12.34	11.9	9.07	13.34	9.81	5.45	9.27
Solyc01g020230	1.2	0.87	0.84	3.56	2.48	1.01	2.05	2.27	2.28	3.49
Solyc01g020240	14.99	11.12	11.19	14.72	22.01	16.06	17.85	17.12	15.25	23.24
Solyc01g020250	0	0	0	0	0	0	0	0	0	0
Solyc01g020260	0.62	0	0	0	0	0	0	0	0	0
Solyc01g020270	0	0	0	0	0	0	0	0	0	0
Solyc01g020280	0	0	0	0	0	0	0	0	0	0
Solyc01g020290	3.92	0.62	1.18	1.55	4.34	2.84	2.38	5.09	4.26	1.4
Solyc01g020300	0	0	0	0	0	0	0	0	0	0
Solyc01g020310	0	0	0	0	0	0	0	0	0	0
Solyc01g020320	15.91	12.56	10.11	7.27	15.5	7.7	13.05	11.28	8.43	6.73
Solyc01g020330	2.53	4.86	2.38	6.46	8.09	17.68	21.92	9.21	10.97	8.62
Solyc01g020340	0.44	0.3	0.44	0.75	0.44	0.97	1.23	0.77	0.31	0.54
Solyc01g020350	0	0	0	0	0	0	0	0.35	0	0
Solyc01g020360	0.48	0	0	0	0	0	0	0	0	0
Solyc01g020370	0	0	0	0	0	0	0	0	0	0
Solyc01g020380	0.14	0.32	0.05	0	0	0	0	0.06	0.1	0.08
Solyc01g020390	0	0	0	0	0	0	0	0	0	0
Solyc01g020400	0	0	0	0	0	0	0	0	0	0
Solyc01g020410	0	0	0	0	0	0	0	0	0	0
Solyc01g020430	0	0	0	0	0	0	0	0	0	0
Solyc01g020440	13.44	8.08	11.44	22.56	31.98	22.61	19.85	20.7	10.06	12.34
Solyc01g020450	0	0	0	0	0	0	0	0	0	0
Solyc01g020460	0	0	0	0	0	1.36	0.06	0	0	0
Solyc01g020470	0	0	0	0	0	0.41	0.15	0	0	0
Solyc01g020480	0	0	0	0	0	0	0	0	0	0
Solyc01g020490	0	0	0	0	0	0	0	0	0	0
Solyc01g020500	7.78	5.48	4.97	7.05	5.61	10.78	20.3	11	6.81	11.23
Solyc01g020510	0	0	0	0	0	0	0	0	0	0
Solyc01g020520	2.32	2.62	2.28	5.09	3.33	2.77	2.71	4.1	3.02	3.28
Solyc01g020530	0	0.21	0.1	0.31	0	0	0	0.24	0.19	0.16
Solyc01g020550	0	0	0	0	0	0	0	0	0	0
Solyc01g020560	0.11	0	0	0	0	0	0	0	0	0
Solyc01g020570	0.11	0.13	0.25	0.89	0.44	0	0.12	0.14	0	0
Solyc01g020580	0	0	0	0	0	0	0	0	0	0
Solyc01g020590	0	0	0	0	0	0	0	0	0	0
Solyc01g020600	0	0.33	0	0	0	0	0	0	0	0
Solyc01g021600	0.51	0.72	0.89	15.83	1.09	0.96	0.26	0.24	0	0
Solyc01g021610	0	0	0	0	0	0	0	0	0	0
Solyc01g021620	0	0	0	0	0	0	0	0	0	0
Solyc01g021630	0	0	0	0.3	0	0	0	0	0	0
Solyc01g021640	4.72	7.11	5.55	14	6.63	7.83	10.08	10.8	9.02	12.64
Solyc01g021650	0	0	0	0	0	0	0	0	0	0
Solyc01g021660	0	0	0	0	0	0	0	0	0	0
Solyc01g021670	30.18	29.99	13.62	21.25	30.54	39.93	49.34	75.88	58.78	43.58
Solyc01g021680	0	0	0	0	0	0	0	0	0	0
Solyc01g021690	0	0	0	0	0	0	0	0	0	0
Solyc01g021700	0	0	0	0	0	0	0	0	0	0
Solyc01g021710	0	0	0	0	0	0	0	0	0	0
Solyc01g021720	0	0	0	0.2	0	0.48	0	0	0	0
Solyc01g021730	1.17	0	0	0.05	0.06	0	0.05	0.21	0.44	1.67
Solyc01g021740	4.14	1.13	5.52	4.63	4.04	3.51	2.92	3.61	3.59	2.5
Solyc01g022740	2.4	3.31	2.45	2.85	2.13	2.83	3.04	5.22	2.86	4.8
Solyc01g022750	58.79	54.15	29.73	102.53	59.73	74.02	53.26	72.28	92.29	101.99
Solyc01g022760	0	0	0	0	0	0	0	0	0	0
Solyc01g022770	0	0	0.45	0	0	0	0	0	0	0
Solyc01g022780	0	0	0	0	0	0	0	0	0	0
Solyc01g022790	0	0	0	0	0	0	0	0	0	0
Solyc01g028800	1.71	0.77	0	2.02	0.78	3.69	1.92	1.16	0.36	0.16
Solyc01g028810	222.85	213.55	163.25	105.16	650.24	543.77	511.04	266.7	349.42	657.66
Solyc01g028830	15.64	14.86	22.7	35.84	17.47	18.44	19.21	22.47	13.73	10.19
Solyc01g028840	0	0	0	0	0	0	0	0	0	0
Solyc01g028850	0.12	0	0	0	0	0	0	0.09	0.07	0
Solyc01g028860	40.02	77.63	44.65	143.51	92.35	185.4	337.81	233.3	197.41	201.51
Solyc01g028870	13	11.84	24.57	8.14	26.07	29.53	30.15	28.62	17	33.56
Solyc01g028880	0	0	0	0	0	0	0	0	0	0
Solyc01g028890	0	0	0	0	0	0	0	0	0	0
Solyc01g028900	120.28	136.89	54.62	86.9	66.15	66.57	76.08	96.42	102.91	97.73
Solyc01g028910	0	0	0	0	0	0	0	0	0	0
Solyc01g028920	0	0	0	0	0	0	0	0	0	0
Solyc01g028930	33.47	27.19	22.54	28.29	25.14	24.71	19.51	20.37	15.25	19.46
Solyc01g028940	0	0	0	0	0	0	0	0	0	0
Solyc01g028950	0	0	0	0	0	0	0	0	0	0
Solyc01g028960	0	0	0	0	0	0	0	0	0	0
Solyc01g028970	0	0	0	0	0	0	0	0	0	0
Solyc01g028980	0	0	0	0	0	0	0	0	0	0
Solyc01g033980	2.67	3.83	1.56	3.58	4.76	4.36	5.39	5.59	6.29	9.49
Solyc01g033990	0	0	0	0	0	0	0	0	0	0
Solyc01g034000	0	0.03	0	0	0	0	0	0	0	0
Solyc01g034010	0.06	0.35	0.06	0	0.08	0	0.22	0.09	0.03	0.2
Solyc01g034020	42.14	37.89	33.25	46.42	51.27	46.21	39.53	46.12	47.35	36.39
Solyc01g034030	0	0	0	0	0	0	0	0	0	0
Solyc01g034040	0	0	0	0	0	0	0	0	0	0
Solyc01g034050	0.19	0.11	0.11	0.35	0.67	0.14	0.33	0.44	0.22	0.26
Solyc01g034060	0	0	0	0	0	0	0	0	0	0.12
Solyc01g034070	0	0	0.12	0	0	0	0	0.16	0	0
Solyc01g034080	0.12	0.43	0.18	0.07	0.25	0.14	0.14	0.04	0.04	0
Solyc01g034090	0	0	0	0	0	0	0	0	0	0
Solyc01g034100	0.46	0.39	0.18	0.18	0.13	0.19	0.38	0.42	0.04	0.25
Solyc01g034110	0	0	0	0	0	0	0	0	0	0
Solyc01g034120	0.1	0.23	0	0	0.14	0	0.44	0	0	0.09
Solyc01g034130	0.06	0.12	0	0.03	0	0	0.06	0.19	0	0.05
Solyc01g034140	0	0	0	0	0	0	0	0	0	0
Solyc01g034150	5.42	8.31	5.89	15.2	4.88	5.44	7.36	7.61	5.12	9.24
Solyc01g034160	0	0	0	0	0	0	0	0	0	0
Solyc01g034170	0	0	0	0	0	0	0	0	0	0
Solyc01g034180	0	0	0	0	0	0	0	0	0	0
Solyc01g034190	0	0	0	0	0	0	0	0	0	0
Solyc01g034200	0	0	0	0	0	0	0	0	0	0
Solyc01g034210	0	0	0	0	0	0	0	0	0	0
Solyc01g034220	0	0	0	0	0	0	0	0	0	0
Solyc01g035220	0.46	0.28	0.78	0	0.65	0.39	2.91	0.29	1.02	0.63
[truncated: 32,729 more rows]

## Sheet: Supplementary Table 3
Supplementary Table3. Normalized expression (RPKM) of SPX genes per tissue based on RNA-seq data.
gene ID	normalized expression (RPKM)
	Heinz_bud_rep1	Heinz_bud_rep2	Heinz_flower_rep1	Heinz_flower_rep2	Heinz_leaf_rep1	Heinz_leaf_rep2	Heinz_root_rep1	Heinz_root_rep2	Heinz_1cm_fruit_rep1	Heinz_1cm_fruit_rep2	Heinz_2cm_fruit_rep1	Heinz_2cm_fruit_rep2	Heinz_3cm_fruit_rep1	Heinz_3cm_fruit_rep2	Heinz_MG_fruit_rep1	Heinz_MG_fruit_rep2	Heinz_B_fruit_rep1	Heinz_B_fruit_rep2	Heinz_B+10_fruit_rep1	Heinz_B+10_fruit_rep2
Solyc00g149970	1.89	2.38	3.04	2.78	1.81	2.18	172.67	163.21	2.21	1.84	4.42	4.71	3.5	3.52	2.01	2.95	0.63	0.33	0.39	0.13
Solyc01g090890	0.17	0.17	0.2	0.2	0.29	0.49	0.3	0.71	0	0	0.14	0.12	0.1	0.1	0.39	0.21	0	0	0.07	0
Solyc01g091870	0.81	0.55	1.03	0.78	0.83	0.76	3.65	3.93	0	0	0	0	0	0	0	0	0	0	0	0
Solyc02g067160	5.73	4.27	18.03	17.31	3.77	4.36	12.04	11.79	5.6	5.68	8.27	7.69	8.07	9.78	7.43	7.79	8.34	9.01	5.91	5.9
Solyc02g088210	12.69	13.73	8	7.19	3.94	3.62	10.74	11.13	2.59	2.53	2.26	1.87	2.38	2.16	1.44	0.93	1.09	0.6	2.14	1.67
Solyc02g088230	3.3	3.07	3.1	3.01	15.58	13.87	4.65	4.5	12.46	11.14	8.97	8.48	4.1	3.95	7.04	6.66	0.33	0.24	0.83	0.84
Solyc02g088240	1.27	2.08	1.77	1.29	1.95	1.1	72.83	73.88	16.92	16.53	9.8	7.41	4.67	3.74	20.18	15.2	0.83	0.86	8.43	6
Solyc02g088250	0.72	0.68	0.51	0.46	0.25	0.13	38.37	35.21	6.43	6.13	5.89	4.8	2.72	2.49	7.74	7.44	0.36	0.25	3.54	3.88
Solyc05g010060	3.64	3.28	5.13	4.72	0.64	0.69	1.12	1.32	0.42	0.75	0.45	0.54	1.57	2	0.05	0.17	0	0	0	0
Solyc05g013180	4.17	3.67	2.63	2.13	2.09	2.37	0.66	0.86	0	0.14	0.12	0.35	0.08	0.16	0.11	0.17	0.3	0.69	0.43	0.79
Solyc08g007800	9.3	9.78	4.86	4.95	0.75	0.93	0.75	1.05	4.32	3.29	7.13	5.73	2.31	3.3	4.06	4.24	19.6	20.38	13.78	14.69
Solyc08g060920	26.71	28.5	38.38	39.07	15.26	18.93	66.61	64.03	15.48	15.19	12.24	10.03	11.34	11.74	43.13	39.42	32.01	29.86	60.31	57.31
Solyc08g068240	0.07	0.04	0.08	0.09	0	0	0	0.04	0	0	0	0	0	0	0	0	0.04	0	0.03	0
Solyc08g080200	30.53	28.92	29.01	28.24	20.71	21.06	12.87	13.2	32.91	29.26	47.55	40.34	37.78	37.05	34.39	33.67	24.22	24.93	24.62	23.43
Solyc09g075040	3.47	3.17	1.8	1.56	2.25	0.5	4.76	4.68	0.94	1.13	1.78	1.55	1.21	1.07	1.34	1.65	0.74	0.9	0.06	0.34
Solyc09g090360	2.06	1.86	2.97	3.43	1.12	1.24	127.06	120.43	2.73	1.95	2.81	3.45	2.72	2.7	1.52	1.41	0.5	0.17	0.22	0.28
Solyc11g045230	24.3	22.44	25.21	19.66	0.48	0.49	1.73	2.54	0.59	0.36	0.29	0.25	0.1	0.2	0	0.11	0.09	0	0.08	0.08
Solyc12g009480	12.62	10.73	18.18	16.85	12.44	12.33	40.44	39.46	15.75	15.69	11.18	9.88	12.14	10.31	12.42	11.36	3.37	5.35	3.2	3.05
Solyc12g056440	5.42	5.55	4.22	4.34	8.69	9.79	15.31	15.49	5.99	5.21	10.28	6.91	8.32	6.4	7.66	9.64	12.78	13.24	16.71	17.56

## Sheet: Supplementary Table 4
Supplementary Table4. The average of normalized expression (RPKM) of SPX genes per tissue based on RNA-seq data.
gene ID	Heinz_bud	Heinz_flower	Heinz_leaf	Heinz_root	Heinz_1cm_fruit	Heinz_2cm_fruit	Heinz_3cm_fruit	Heinz_MG	Heinz_B	Heinz_B10
Solyc00g149970	2.14	2.91	2	167.94	2.03	4.57	3.51	2.48	0.48	0.26
Solyc01g090890	0.17	0.2	0.39	0.51	0	0.13	0.1	0.3	0	0.04
Solyc01g091870	0.68	0.91	0.8	3.79	0	0	0	0	0	0
Solyc02g067160	5	17.67	4.07	11.92	5.64	7.98	8.93	7.61	8.68	5.91
Solyc02g088210	13.21	7.6	3.78	10.94	2.56	2.07	2.27	1.19	0.85	1.91
Solyc02g088230	3.19	3.06	14.73	4.58	11.8	8.73	4.03	6.85	0.29	0.84
Solyc02g088240	1.68	1.53	1.53	73.36	16.73	8.61	4.21	17.69	0.85	7.22
Solyc02g088250	0.7	0.49	0.19	36.79	6.28	5.35	2.61	7.59	0.31	3.71
Solyc05g010060	3.46	4.93	0.67	1.22	0.59	0.5	1.79	0.11	0	0
Solyc05g013180	3.92	2.38	2.23	0.76	0.07	0.24	0.12	0.14	0.5	0.61
Solyc08g007800	9.54	4.91	0.84	0.9	3.81	6.43	2.81	4.15	19.99	14.24
Solyc08g060920	27.61	38.73	17.1	65.32	15.34	11.14	11.54	41.28	30.94	58.81
Solyc08g068240	0.06	0.09	0	0.02	0	0	0	0	0.02	0.02
Solyc08g080200	29.73	28.63	20.89	13.04	31.09	43.95	37.42	34.03	24.58	24.03
Solyc09g075040	3.32	1.68	1.38	4.72	1.04	1.67	1.14	1.5	0.82	0.2
Solyc09g090360	1.96	3.2	1.18	123.75	2.34	3.13	2.71	1.47	0.34	0.25
Solyc11g045230	23.37	22.44	0.49	2.14	0.48	0.27	0.15	0.06	0.05	0.08
Solyc12g009480	11.68	17.52	12.39	39.95	15.72	10.53	11.23	11.89	4.36	3.13
Solyc12g056440	5.49	4.28	9.24	15.4	5.6	8.6	7.36	8.65	13.01	17.14

## Sheet: Supplementary Table 5
Supplementary Table 5.Differential expression of SPX-domain-containing protein Genes in different tissues. Significant:p<0.05
gene ID	Heinz_bud vs Heinz_root			Heinz_flower vs Heinz_root			Heinz_leaf vs Heinz_root			Heinz_1cm_fruit vs Heinz_root			Heinz_2cm_fruit vs Heinz_root			Heinz_3cm_fruit vs Heinz_root			Heinz_MG_fruit vs Heinz_root			Heinz_B_fruit vs Heinz_root			Heinz_B+10_fruit vs Heinz_root
	log2(fold-changes)	p-value	Significant	log2(fold-changes)	p-value	Significant	log2(fold-changes)	p-value	Significant	log2(fold-changes)	p-value	Significant	log2(fold-changes)	p-value	Significant	log2(fold-changes)	p-value	Significant	log2(fold-changes)	p-value	Significant	log2(fold-changes)	p-value	Significant	log2(fold-changes)	p-value	Significant
Solyc00g149970	-5.7496	0.000815004	TRUE	-5.4332	0.000821087	TRUE	-5.8154	0.000812696	TRUE	-5.80105	0.00081299	TRUE	-4.92269	0.00083794	TRUE	-5.22724	0.000826463	TRUE	-5.60128	0.000824263	TRUE	-6.83477	0.000797658	TRUE	-7.06694	0.00079537	TRUE
Solyc01g090890	-0.36804	0.243842	FALSE	-0.331514	0.275195	FALSE	-0.119464	0.664189	FALSE	-0.594549	0.132752	FALSE	-0.418226	0.209211	FALSE	-0.457045	0.186863	FALSE	-0.216037	0.456512	FALSE	-0.594549	0.132752	FALSE	-0.537965	0.152293	FALSE
Solyc01g091870	-1.51156	0.00375251	TRUE	-1.32645	0.00420546	TRUE	-1.41203	0.00231357	TRUE	-2.26003	0.00136173	TRUE	-2.26003	0.00136173	TRUE	-2.26003	0.00136173	TRUE	-2.26003	0.00136173	TRUE	-2.26003	0.00136173	TRUE	-2.26003	0.00136173	TRUE
Solyc02g067160	-1.10657	0.0112776	TRUE	0.531116	0.00435618	TRUE	-1.34955	0.00166164	TRUE	-0.960351	0.000437167	TRUE	-0.524819	0.00637887	TRUE	-0.37974	0.0743256	FALSE	-0.585521	0.00258129	TRUE	-0.416527	0.0119609	TRUE	-0.902848	0.000432995	TRUE
Solyc02g088210	0.251104	0.0547443	FALSE	-0.473394	0.0176343	TRUE	-1.32072	0.00124051	TRUE	-1.74585	0.000554495	TRUE	-1.95949	0.000965212	TRUE	-1.86844	0.000666934	TRUE	-2.4468	0.00108226	TRUE	-2.69021	0.000961697	TRUE	-2.03671	0.00114164	TRUE
Solyc02g088230	-0.413315	0.00961573	TRUE	-0.458785	0.00329476	TRUE	1.49518	0.00707459	TRUE	1.19781	0.00834681	TRUE	0.802175	0.00379022	TRUE	-0.149707	0.0352362	TRUE	0.492428	0.00796563	TRUE	-2.11289	0.000415409	TRUE	-1.60056	0.000403685	TRUE
Solyc02g088240	-4.79422	8.5557e-05	TRUE	-4.87732	6.45869e-05	TRUE	-4.87732	8.84165e-05	TRUE	-2.06833	9.77887e-05	TRUE	-2.95192	0.000406103	TRUE	-3.83517	0.000102845	TRUE	-1.99226	0.00208336	TRUE	-5.32893	5.24618e-05	TRUE	-3.17732	0.000400228	TRUE
Solyc02g088250	-4.4744	0.00191145	TRUE	-4.66462	0.00188911	TRUE	-4.98897	0.00186108	TRUE	-2.37599	0.00269506	TRUE	-2.57318	0.00281318	TRUE	-3.38793	0.00214063	TRUE	-2.13727	0.00294121	TRUE	-4.85037	0.00187236	TRUE	-3.00421	0.00229976	TRUE
Solyc05g010060	1.00648	0.00834463	TRUE	1.41747	0.00376856	TRUE	-0.410712	0.032806	TRUE	-0.481533	0.0812286	FALSE	-0.565597	0.0221212	TRUE	0.329705	0.140056	FALSE	-1	0.0108586	TRUE	-1.15056	0.00665166	TRUE	-1.15056	0.00665166	TRUE
Solyc05g013180	1.48308	0.00718233	TRUE	0.941448	0.0265309	TRUE	0.875959	0.0134228	TRUE	-0.717965	0.0298994	TRUE	-0.505235	0.0749168	FALSE	-0.652077	0.0271714	TRUE	-0.626542	0.0272041	TRUE	-0.230613	0.350121	FALSE	-0.128515	0.542078	FALSE
Solyc08g007800	2.4718	0.00107129	TRUE	1.63716	0.00152549	TRUE	-0.0462937	0.764298	FALSE	1.34004	0.0324444	TRUE	1.96736	0.016349	TRUE	1.00379	0.066454	FALSE	1.43857	0.00288451	TRUE	3.46563	0.000478763	TRUE	3.00379	0.00128826	TRUE
Solyc08g060920	-1.21292	0.00172856	TRUE	-0.739215	0.00251156	TRUE	-1.87345	0.00215641	TRUE	-2.02104	0.000673773	TRUE	-2.44968	0.000981221	TRUE	-2.40291	0.000588667	TRUE	-0.649469	0.00871466	TRUE	-1.05408	0.00237639	TRUE	-0.149057	0.0812587	FALSE
Solyc08g068240	0.0554951	0.296474	FALSE	0.095759	0.0875789	FALSE	-0.0285692	0.42265	FALSE	-0.0285692	0.42265	FALSE	-0.0285692	0.42265	FALSE	-0.0285692	0.42265	FALSE	-0.0285692	0.42265	FALSE	0	1	FALSE	0	0.859972	FALSE
Solyc08g080200	1.1301	0.00241533	TRUE	1.07752	0.000721093	TRUE	0.640729	0.000937461	TRUE	1.19258	0.0101498	TRUE	1.67878	0.0133583	TRUE	1.45231	0.000269834	TRUE	1.31905	0.000355592	TRUE	0.865473	0.00114879	TRUE	0.834115	0.0031417	TRUE
Solyc09g075040	-0.404984	0.0120737	TRUE	-1.09378	0.00172682	TRUE	-1.26505	0.0622367	FALSE	-1.48745	0.000781528	TRUE	-1.09918	0.00158467	TRUE	-1.4184	0.000506777	TRUE	-1.19409	0.00245473	TRUE	-1.65208	0.000525555	TRUE	-2.25298	0.00103606	TRUE
Solyc09g090360	-5.3973	0.000740784	TRUE	-4.89251	0.000759031	TRUE	-5.83857	0.000730971	TRUE	-5.22305	0.000755043	TRUE	-4.91675	0.000761546	TRUE	-5.07148	0.000749309	TRUE	-5.65838	0.00073434	TRUE	-6.54066	0.000722554	TRUE	-6.64097	0.000719838	TRUE
Solyc11g045230	2.95627	0.00227403	TRUE	2.90014	0.0185553	TRUE	-1.07545	0.0553057	FALSE	-1.08517	0.0587155	FALSE	-1.30594	0.0441646	TRUE	-1.44913	0.0397593	TRUE	-1.5667	0.0365103	TRUE	-1.58038	0.0359754	TRUE	-1.53973	0.0367149	TRUE
Solyc12g009480	-1.69131	0.00141433	TRUE	-1.14478	0.00135287	TRUE	-1.61271	0.00031982	TRUE	-1.29229	0.000410245	TRUE	-1.82847	0.000764659	TRUE	-1.74344	0.0013031	TRUE	-1.66761	0.000661046	TRUE	-2.93356	0.00096194	TRUE	-3.30965	0.000181153	TRUE
Solyc12g056440	-1.33741	0.000125349	TRUE	-1.63509	9.46051e-05	TRUE	-0.67948	0.00808625	TRUE	-1.31316	0.00166389	TRUE	-0.77259	0.0563406	TRUE	-0.972121	0.0140794	TRUE	-0.765095	0.0210079	TRUE	-0.227239	0.010511	TRUE	0.145479	0.057354	TRUE
